# Supplementary material
Source: publisher site journal article supplement (https://www.spandidos-publications.com/682/downloadSupplementary)
Supplement: Supplementary file 1 [file downloadSupplementary]

## Sheet: TopBlastHits
GO function annotation and analysis different expressed proteins of OXA vs. control TopBlastHits
Sequence name	Sequence desc.	Sequence length	Hit desc.	Hit ACC	E-Value	Similarity	Bit-Score	Alignment length	Positives
P62269	RS18_HUMAN40S ribosomal S18 OS=Homo sapiens GN=RPS18 PE=1 SV=3	152	sp|P62269|RS18_HUMAN40S ribosomal protein S18 OS=Homo sapiens GN=RPS18 PE=1 SV=3	P62269	9.29974e-108	100	307.375	152	152
O43678	NDUA2_HUMANNADH dehydrogenase	99	sp|O43678|NDUA2_HUMANNADH dehydrogenase [ubiquinone] 1 alpha subcomplex subunit 2 OS=Homo sapiens GN=NDUFA2 PE=1 SV=3	O43678	3.67863e-69	100	205.297	99	99
P63173	RL38_HUMAN60S ribosomal L38 OS=Homo sapiens GN=RPL38 PE=1 SV=2	70	sp|P63173|RL38_HUMAN60S ribosomal protein L38 OS=Homo sapiens GN=RPL38 PE=1 SV=2	P63173	2.22625e-43	100	137.502	70	70
P62273	RS29_HUMAN40S ribosomal S29 OS=Homo sapiens GN=RPS29 PE=1 SV=2	56	sp|P62273|RS29_HUMAN40S ribosomal protein S29 OS=Homo sapiens GN=RPS29 PE=1 SV=2	P62273	1.87888e-36	100	118.627	56	56
P62857	RS28_HUMAN40S ribosomal S28 OS=Homo sapiens GN=RPS28 PE=1 SV=1	69	sp|P62857|RS28_HUMAN40S ribosomal protein S28 OS=Homo sapiens GN=RPS28 PE=1 SV=1	P62857	2.82376e-43	100	137.117	69	69
B3KS36	RL3_HUMAN60S ribosomal L3 OS=Homo sapiens GN=RPL3 PE=1 SV=2	354	sp|P39023|RL3_HUMAN60S ribosomal protein L3 OS=Homo sapiens GN=RPL3 PE=1 SV=2	P39023	0	87	697.967	403	352
B5BU78	TP4A1_HUMAN tyrosine phosphatase type IVA 1 OS=Homo sapiens GN=PTP4A1 PE=1 SV=2	173	sp|Q93096|TP4A1_HUMANProtein tyrosine phosphatase type IVA 1 OS=Homo sapiens GN=PTP4A1 PE=1 SV=2	Q93096	4.14187e-129	99	363.229	173	172
F8VZJ2	NACA_HUMANNascent polypeptide-associated complex subunit alpha OS=Homo sapiens GN=NACA PE=1 SV=1	136	sp|Q13765|NACA_HUMANNascent polypeptide-associated complex subunit alpha OS=Homo sapiens GN=NACA PE=1 SV=1	Q13765	2.41038e-94	100	275.018	136	136
A0A024RDF4	HNRPD_HUMANHeterogeneous nuclear ribonucleo D0 OS=Homo sapiens GN=HNRNPD PE=1 SV=1	306	sp|Q14103|HNRPD_HUMANHeterogeneous nuclear ribonucleoprotein D0 OS=Homo sapiens GN=HNRNPD PE=1 SV=1	Q14103	0	86	597.045	355	306
P17096	HMGA1_HUMANHigh mobility group HMG-I HMG-Y OS=Homo sapiens GN=HMGA1 PE=1 SV=3	107	sp|P17096|HMGA1_HUMANHigh mobility group protein HMG-I/HMG-Y OS=Homo sapiens GN=HMGA1 PE=1 SV=3	P17096	1.35334e-65	100	196.823	107	107
A0A024R8K7	ITB4_HUMANIntegrin beta-4 OS=Homo sapiens GN=ITGB4 PE=1 SV=5	1752	sp|P16144|ITB4_HUMANIntegrin beta-4 OS=Homo sapiens GN=ITGB4 PE=1 SV=5	P16144	0	94	3517.24	1824	1728
Q5TEC6	H32_HUMANHistone OS=Homo sapiens GN=HIST2H3A PE=1 SV=3	136	sp|Q71DI3|H32_HUMANHistone H3.2 OS=Homo sapiens GN=HIST2H3A PE=1 SV=3	Q71DI3	3.64917e-92	97	266.544	136	133
J3QR09	RL19_HUMAN60S ribosomal L19 OS=Homo sapiens GN=RPL19 PE=1 SV=1	193	sp|P84098|RL19_HUMAN60S ribosomal protein L19 OS=Homo sapiens GN=RPL19 PE=1 SV=1	P84098	2.18956e-135	100	380.948	193	193
A8K7D9	IMA1_HUMANImportin subunit alpha-1 OS=Homo sapiens GN=KPNA2 PE=1 SV=1	529	sp|P52292|IMA1_HUMANImportin subunit alpha-1 OS=Homo sapiens GN=KPNA2 PE=1 SV=1	P52292	0	100	1088.17	529	529
I3L172	F195A_HUMAN FAM195A OS=Homo sapiens GN=FAM195A PE=1 SV=2	65	sp|Q9BUT9|F195A_HUMANProtein FAM195A OS=Homo sapiens GN=FAM195A PE=1 SV=2	Q9BUT9	3.48597e-36	100	121.709	61	61
Q5JR08	RHOC_HUMANRho-related GTP-binding OS=Homo sapiens GN=RHOC PE=1 SV=1	188	sp|P08134|RHOC_HUMANRho-related GTP-binding protein RhoC OS=Homo sapiens GN=RHOC PE=1 SV=1	P08134	5.7485e-139	100	389.808	188	188
O75438	NDUB1_HUMANNADH dehydrogenase	58	sp|O75438|NDUB1_HUMANNADH dehydrogenase [ubiquinone] 1 beta subcomplex subunit 1 OS=Homo sapiens GN=NDUFB1 PE=1 SV=1	O75438	3.88153e-38	100	123.25	58	58
P08581	MET_HUMANHepatocyte growth factor receptor OS=Homo sapiens GN=MET PE=1 SV=4	1390	sp|P08581|MET_HUMANHepatocyte growth factor receptor OS=Homo sapiens GN=MET PE=1 SV=4	P08581	0	100	2894.38	1390	1390
Q9Y3C1	NOP16_HUMANNucleolar 16 OS=Homo sapiens GN=NOP16 PE=1 SV=2	178	sp|Q9Y3C1|NOP16_HUMANNucleolar protein 16 OS=Homo sapiens GN=NOP16 PE=1 SV=2	Q9Y3C1	5.44146e-130	100	365.925	178	178
P84101	SERF2_HUMANSmall EDRK-rich factor 2 OS=Homo sapiens GN=SERF2 PE=1 SV=1	59	sp|P84101|SERF2_HUMANSmall EDRK-rich factor 2 OS=Homo sapiens GN=SERF2 PE=1 SV=1	P84101	1.97317e-34	100	114.005	59	59
P07311	ACYP1_HUMANAcylphosphatase-1 OS=Homo sapiens GN=ACYP1 PE=1 SV=2	99	sp|P07311|ACYP1_HUMANAcylphosphatase-1 OS=Homo sapiens GN=ACYP1 PE=1 SV=2	P07311	3.29848e-69	100	205.297	99	99
Q13895	BYST_HUMANBystin OS=Homo sapiens GN=BYSL PE=1 SV=3	437	sp|Q13895|BYST_HUMANBystin OS=Homo sapiens GN=BYSL PE=1 SV=3	Q13895	0	100	895.19	437	437
B2R4U3	UBE2C_HUMANUbiquitin-conjugating enzyme E2 C OS=Homo sapiens GN=UBE2C PE=1 SV=1	179	sp|O00762|UBE2C_HUMANUbiquitin-conjugating enzyme E2 C OS=Homo sapiens GN=UBE2C PE=1 SV=1	O00762	1.46553e-132	99	372.474	179	178
P62081	RS7_HUMAN40S ribosomal S7 OS=Homo sapiens GN=RPS7 PE=1 SV=1	194	sp|P62081|RS7_HUMAN40S ribosomal protein S7 OS=Homo sapiens GN=RPS7 PE=1 SV=1	P62081	5.19684e-138	100	387.497	194	194
Q6IAM0	EIF3G_HUMANEukaryotic translation initiation factor 3 subunit G OS=Homo sapiens GN=EIF3G PE=1 SV=2	320	sp|O75821|EIF3G_HUMANEukaryotic translation initiation factor 3 subunit G OS=Homo sapiens GN=EIF3G PE=1 SV=2	O75821	0	99	658.677	320	319
Q9BVP2	GNL3_HUMANGuanine nucleotide-binding -like 3 OS=Homo sapiens GN=GNL3 PE=1 SV=2	549	sp|Q9BVP2|GNL3_HUMANGuanine nucleotide-binding protein-like 3 OS=Homo sapiens GN=GNL3 PE=1 SV=2	Q9BVP2	0	100	1126.69	549	549
Q6DKI1	RL7L_HUMAN60S ribosomal L7-like 1 OS=Homo sapiens GN=RPL7L1 PE=1 SV=1	246	sp|Q6DKI1|RL7L_HUMAN60S ribosomal protein L7-like 1 OS=Homo sapiens GN=RPL7L1 PE=1 SV=1	Q6DKI1	5.61844e-180	100	498.434	246	246
Q8N4P8	NOG1_HUMANNucleolar GTP-binding 1 OS=Homo sapiens GN=GTPBP4 PE=1 SV=3	632	sp|Q9BZE4|NOG1_HUMANNucleolar GTP-binding protein 1 OS=Homo sapiens GN=GTPBP4 PE=1 SV=3	Q9BZE4	0	100	1295.8	628	628
Q9BVJ6	UT14A_HUMANU3 small nucleolar RNA-associated 14 homolog A OS=Homo sapiens GN=UTP14A PE=1 SV=1	771	sp|Q9BVJ6|UT14A_HUMANU3 small nucleolar RNA-associated protein 14 homolog A OS=Homo sapiens GN=UTP14A PE=1 SV=1	Q9BVJ6	0	100	1550.03	771	771
P83881	RL36A_HUMAN60S ribosomal L36a OS=Homo sapiens GN=RPL36A PE=1 SV=2	106	sp|P83881|RL36A_HUMAN60S ribosomal protein L36a OS=Homo sapiens GN=RPL36A PE=1 SV=2	P83881	2.04082e-72	100	214.157	106	106
B2R841	PLK1_HUMANSerine threonine- kinase PLK1 OS=Homo sapiens GN=PLK1 PE=1 SV=1	603	sp|P53350|PLK1_HUMANSerine/threonine-protein kinase PLK1 OS=Homo sapiens GN=PLK1 PE=1 SV=1	P53350	0	99	1243.41	603	602
B2R4N3	UBL5_HUMANUbiquitin 5 OS=Homo sapiens GN=UBL5 PE=1 SV=1	73	sp|Q9BZL1|UBL5_HUMANUbiquitin-like protein 5 OS=Homo sapiens GN=UBL5 PE=1 SV=1	Q9BZL1	3.78814e-48	100	149.828	73	73
Q9UJC5	SH3L2_HUMANSH3 domain-binding glutamic acid-rich 2 OS=Homo sapiens GN=SH3BGRL2 PE=1 SV=2	107	sp|Q9UJC5|SH3L2_HUMANSH3 domain-binding glutamic acid-rich-like protein 2 OS=Homo sapiens GN=SH3BGRL2 PE=1 SV=2	Q9UJC5	3.01219e-75	100	221.476	107	107
Q9NSI2	F207A_HUMAN FAM207A OS=Homo sapiens GN=FAM207A PE=1 SV=2	230	sp|Q9NSI2|F207A_HUMANProtein FAM207A OS=Homo sapiens GN=FAM207A PE=1 SV=2	Q9NSI2	5.93522e-162	100	451.44	230	230
B2R823	PNO1_HUMANRNA-binding PNO1 OS=Homo sapiens GN=PNO1 PE=1 SV=1	252	sp|Q9NRX1|PNO1_HUMANRNA-binding protein PNO1 OS=Homo sapiens GN=PNO1 PE=1 SV=1	Q9NRX1	0	99	511.531	252	251
B6CGU5	CASP8_HUMANCaspase-8 OS=Homo sapiens GN=CASP8 PE=1 SV=1	395	sp|Q14790|CASP8_HUMANCaspase-8 OS=Homo sapiens GN=CASP8 PE=1 SV=1	Q14790	2.47822e-158	69	458.759	398	278
Q9NY93	DDX56_HUMANProbable ATP-dependent RNA helicase DDX56 OS=Homo sapiens GN=DDX56 PE=1 SV=1	547	sp|Q9NY93|DDX56_HUMANProbable ATP-dependent RNA helicase DDX56 OS=Homo sapiens GN=DDX56 PE=1 SV=1	Q9NY93	0	100	1112.44	547	547
B3KRC6	CP51A_HUMANLanosterol 14-alpha demethylase OS=Homo sapiens GN=CYP51A1 PE=1 SV=3	449	sp|Q16850|CP51A_HUMANLanosterol 14-alpha demethylase OS=Homo sapiens GN=CYP51A1 PE=1 SV=3	Q16850	0	100	934.865	446	446
A0A097PY54	ATP6_HUMANATP synthase subunit a OS=Homo sapiens GN=MT-ATP6 PE=1 SV=1	226	sp|P00846|ATP6_HUMANATP synthase subunit a OS=Homo sapiens GN=MT-ATP6 PE=1 SV=1	P00846	2.6652e-152	98	426.402	226	222
Q86U90	YRDC_HUMAN domain-containing mitochondrial OS=Homo sapiens GN=YRDC PE=1 SV=1	279	sp|Q86U90|YRDC_HUMANYrdC domain-containing protein, mitochondrial OS=Homo sapiens GN=YRDC PE=1 SV=1	Q86U90	0	100	554.288	279	279
H3BMQ2	RLP24_HUMANProbable ribosome biogenesis RLP24 OS=Homo sapiens GN=RSL24D1 PE=1 SV=1	66	sp|Q9UHA3|RLP24_HUMANProbable ribosome biogenesis protein RLP24 OS=Homo sapiens GN=RSL24D1 PE=1 SV=1	Q9UHA3	4.55318e-34	100	116.316	56	56
A5YRV2	MUC1_HUMANMucin-1 OS=Homo sapiens GN=MUC1 PE=1 SV=3	217	sp|P15941|MUC1_HUMANMucin-1 OS=Homo sapiens GN=MUC1 PE=1 SV=3	P15941	5.43197e-128	100	393.66	176	176
P82914	RT15_HUMAN28S ribosomal mitochondrial OS=Homo sapiens GN=MRPS15 PE=1 SV=1	257	sp|P82914|RT15_HUMAN28S ribosomal protein S15, mitochondrial OS=Homo sapiens GN=MRPS15 PE=1 SV=1	P82914	0	100	525.783	257	257
Q5JXX1	MO4L2_HUMANMortality factor 4 2 OS=Homo sapiens GN=MORF4L2 PE=1 SV=1	158	sp|Q15014|MO4L2_HUMANMortality factor 4-like protein 2 OS=Homo sapiens GN=MORF4L2 PE=1 SV=1	Q15014	1.92204e-111	100	322.013	158	158
A8K201	RRP15_HUMANRRP15 OS=Homo sapiens GN=RRP15 PE=1 SV=2	259	sp|Q9Y3B9|RRP15_HUMANRRP15-like protein OS=Homo sapiens GN=RRP15 PE=1 SV=2	Q9Y3B9	0	99	522.316	259	258
P62861	RS30_HUMAN40S ribosomal S30 OS=Homo sapiens GN=FAU PE=1 SV=1	59	sp|P62861|RS30_HUMAN40S ribosomal protein S30 OS=Homo sapiens GN=FAU PE=1 SV=1	P62861	4.65962e-35	100	115.546	59	59
Q9Y6H1	CHCH2_HUMANCoiled-coil-helix-coiled-coil-helix domain-containing 2 OS=Homo sapiens GN=CHCHD2 PE=1 SV=1	151	sp|Q9Y6H1|CHCH2_HUMANCoiled-coil-helix-coiled-coil-helix domain-containing protein 2 OS=Homo sapiens GN=CHCHD2 PE=1 SV=1	Q9Y6H1	8.33636e-105	100	300.056	151	151
Q13823	NOG2_HUMANNucleolar GTP-binding 2 OS=Homo sapiens GN=GNL2 PE=1 SV=1	731	sp|Q13823|NOG2_HUMANNucleolar GTP-binding protein 2 OS=Homo sapiens GN=GNL2 PE=1 SV=1	Q13823	0	100	1509.2	731	731
A6NLH6	CNIH4_HUMAN cornichon homolog 4 OS=Homo sapiens GN=CNIH4 PE=1 SV=1	137	sp|Q9P003|CNIH4_HUMANProtein cornichon homolog 4 OS=Homo sapiens GN=CNIH4 PE=1 SV=1	Q9P003	6.84529e-93	100	268.47	131	131
Q9HBR0	S38AA_HUMAN sodium-coupled neutral amino acid transporter 10 OS=Homo sapiens GN=SLC38A10 PE=1 SV=2	1119	sp|Q9HBR0|S38AA_HUMANPutative sodium-coupled neutral amino acid transporter 10 OS=Homo sapiens GN=SLC38A10 PE=1 SV=2	Q9HBR0	0	100	2247.63	1119	1119
Q8N5I2	ARRD1_HUMANArrestin domain-containing 1 OS=Homo sapiens GN=ARRDC1 PE=1 SV=1	433	sp|Q8N5I2|ARRD1_HUMANArrestin domain-containing protein 1 OS=Homo sapiens GN=ARRDC1 PE=1 SV=1	Q8N5I2	0	100	872.078	433	433
B4DE67	LICH_HUMANLysosomal acid lipase cholesteryl ester hydrolase OS=Homo sapiens GN=LIPA PE=1 SV=2	204	sp|P38571|LICH_HUMANLysosomal acid lipase/cholesteryl ester hydrolase OS=Homo sapiens GN=LIPA PE=1 SV=2	P38571	1.79401e-152	100	432.565	204	204
E9PLD3	CK098_HUMANUncharacterized protein C11orf98 OS=Homo sapiens GN=C11orf98 PE=4 SV=1	99	sp|E9PRG8|CK098_HUMANUncharacterized protein C11orf98 OS=Homo sapiens GN=C11orf98 PE=4 SV=1	E9PRG8	1.03218e-54	100	169.088	87	87
Q8NEF9	SRFB1_HUMANSerum response factor-binding 1 OS=Homo sapiens GN=SRFBP1 PE=1 SV=1	429	sp|Q8NEF9|SRFB1_HUMANSerum response factor-binding protein 1 OS=Homo sapiens GN=SRFBP1 PE=1 SV=1	Q8NEF9	0	100	871.307	429	429
F6TR53	H1BP3_HUMANHCLS1-binding 3 OS=Homo sapiens GN=HS1BP3 PE=1 SV=1	213	sp|Q53T59|H1BP3_HUMANHCLS1-binding protein 3 OS=Homo sapiens GN=HS1BP3 PE=1 SV=1	Q53T59	4.1092e-148	100	421.779	208	208
Q96GA3	LTV1_HUMAN LTV1 homolog OS=Homo sapiens GN=LTV1 PE=1 SV=1	475	sp|Q96GA3|LTV1_HUMANProtein LTV1 homolog OS=Homo sapiens GN=LTV1 PE=1 SV=1	Q96GA3	0	100	971.459	475	475
A0A024R7S3	CLCB_HUMANClathrin light chain B OS=Homo sapiens GN=CLTB PE=1 SV=1	211	sp|P09497|CLCB_HUMANClathrin light chain B OS=Homo sapiens GN=CLTB PE=1 SV=1	P09497	1.74732e-148	92	416.387	229	211
D6RBD9	TXD15_HUMANThioredoxin domain-containing 15 OS=Homo sapiens GN=TXNDC15 PE=1 SV=1	155	sp|Q96J42|TXD15_HUMANThioredoxin domain-containing protein 15 OS=Homo sapiens GN=TXNDC15 PE=1 SV=1	Q96J42	3.01363e-107	98	313.923	157	155
Q96T88	UHRF1_HUMANE3 ubiquitin- ligase UHRF1 OS=Homo sapiens GN=UHRF1 PE=1 SV=1	793	sp|Q96T88|UHRF1_HUMANE3 ubiquitin-protein ligase UHRF1 OS=Homo sapiens GN=UHRF1 PE=1 SV=1	Q96T88	0	100	1654.03	793	793
Q9H9Y2	RPF1_HUMANRibosome production factor 1 OS=Homo sapiens GN=RPF1 PE=1 SV=2	349	sp|Q9H9Y2|RPF1_HUMANRibosome production factor 1 OS=Homo sapiens GN=RPF1 PE=1 SV=2	Q9H9Y2	0	100	724.931	349	349
O95478	NSA2_HUMANRibosome biogenesis NSA2 homolog OS=Homo sapiens GN=NSA2 PE=1 SV=1	260	sp|O95478|NSA2_HUMANRibosome biogenesis protein NSA2 homolog OS=Homo sapiens GN=NSA2 PE=1 SV=1	O95478	0	100	531.176	260	260
A0A0S2Z5K6	SIL1_HUMANNucleotide exchange factor SIL1 OS=Homo sapiens GN=SIL1 PE=1 SV=1	397	sp|Q9H173|SIL1_HUMANNucleotide exchange factor SIL1 OS=Homo sapiens GN=SIL1 PE=1 SV=1	Q9H173	0	83	713.375	461	386
H0YNP9	MESH1_HUMANGuanosine-3 ,5 -bis(diphosphate) 3 -pyrophosphohydrolase MESH1 OS=Homo sapiens GN=HDDC3 PE=1 SV=3	143	sp|Q8N4P3|MESH1_HUMANGuanosine-3',5'-bis(diphosphate) 3'-pyrophosphohydrolase MESH1 OS=Homo sapiens GN=HDDC3 PE=1 SV=3	Q8N4P3	8.77108e-97	100	280.411	137	137
O43805	SSNA1_HUMANSjoegren syndrome nuclear autoantigen 1 OS=Homo sapiens GN=SSNA1 PE=1 SV=2	119	sp|O43805|SSNA1_HUMANSjoegren syndrome nuclear autoantigen 1 OS=Homo sapiens GN=SSNA1 PE=1 SV=2	O43805	9.18542e-81	100	236.498	119	119
B3KNS8	SURF6_HUMANSurfeit locus 6 OS=Homo sapiens GN=SURF6 PE=1 SV=3	361	sp|O75683|SURF6_HUMANSurfeit locus protein 6 OS=Homo sapiens GN=SURF6 PE=1 SV=3	O75683	0	99	695.271	361	360
Q92604	LGAT1_HUMANAcyl- :lysophosphatidylglycerol acyltransferase 1 OS=Homo sapiens GN=LPGAT1 PE=1 SV=1	370	sp|Q92604|LGAT1_HUMANAcyl-CoA:lysophosphatidylglycerol acyltransferase 1 OS=Homo sapiens GN=LPGAT1 PE=1 SV=1	Q92604	0	100	771.155	370	370
Q75MX0	SEM3C_HUMANSemaphorin-3C OS=Homo sapiens GN=SEMA3C PE=2 SV=2	88	sp|Q99985|SEM3C_HUMANSemaphorin-3C OS=Homo sapiens GN=SEMA3C PE=2 SV=2	Q99985	1.0366e-55	100	184.496	88	88
C9JCN8	FOSL2_HUMANFos-related antigen 2 OS=Homo sapiens GN=FOSL2 PE=1 SV=1	202	sp|P15408|FOSL2_HUMANFos-related antigen 2 OS=Homo sapiens GN=FOSL2 PE=1 SV=1	P15408	6.29983e-144	100	408.297	202	202
Q6FHK1	RM28_HUMAN39S ribosomal mitochondrial OS=Homo sapiens GN=MRPL28 PE=1 SV=4	128	sp|Q13084|RM28_HUMAN39S ribosomal protein L28, mitochondrial OS=Homo sapiens GN=MRPL28 PE=1 SV=4	Q13084	6.84714e-85	99	252.292	128	127
B4DE48	SNX17_HUMANSorting nexin-17 OS=Homo sapiens GN=SNX17 PE=1 SV=1	440	sp|Q15036|SNX17_HUMANSorting nexin-17 OS=Homo sapiens GN=SNX17 PE=1 SV=1	Q15036	0	100	895.96	440	440
O00458	IFRD1_HUMANInterferon-related developmental regulator 1 OS=Homo sapiens GN=IFRD1 PE=1 SV=4	451	sp|O00458|IFRD1_HUMANInterferon-related developmental regulator 1 OS=Homo sapiens GN=IFRD1 PE=1 SV=4	O00458	0	100	936.406	451	451
B4DYY3	BBS1_HUMANBardet-Biedl syndrome 1 OS=Homo sapiens GN=BBS1 PE=1 SV=1	165	sp|Q8NFJ9|BBS1_HUMANBardet-Biedl syndrome 1 protein OS=Homo sapiens GN=BBS1 PE=1 SV=1	Q8NFJ9	9.96045e-76	86	239.965	147	127
Q5T280	CI114_HUMAN methyltransferase C9orf114 OS=Homo sapiens GN=C9orf114 PE=1 SV=3	376	sp|Q5T280|CI114_HUMANPutative methyltransferase C9orf114 OS=Homo sapiens GN=C9orf114 PE=1 SV=3	Q5T280	0	100	777.319	376	376
F1JVV5	EWS_HUMANRNA-binding EWS OS=Homo sapiens GN=EWSR1 PE=1 SV=1	537	sp|Q01844|EWS_HUMANRNA-binding protein EWS OS=Homo sapiens GN=EWSR1 PE=1 SV=1	Q01844	0	98	598.971	331	325
A0A024R8I8	SAPC2_HUMANSuppressor APC domain-containing 2 OS=Homo sapiens GN=SAPCD2 PE=1 SV=2	394	sp|Q86UD0|SAPC2_HUMANSuppressor APC domain-containing protein 2 OS=Homo sapiens GN=SAPCD2 PE=1 SV=2	Q86UD0	0	99	762.296	394	392
B1ALI9	TXNIP_HUMANThioredoxin-interacting OS=Homo sapiens GN=TXNIP PE=1 SV=1	304	sp|Q9H3M7|TXNIP_HUMANThioredoxin-interacting protein OS=Homo sapiens GN=TXNIP PE=1 SV=1	Q9H3M7	0	100	575.474	278	278
B0AZV9	TPC6B_HUMANTrafficking particle complex subunit 6B OS=Homo sapiens GN=TRAPPC6B PE=1 SV=1	94	sp|Q86SZ2|TPC6B_HUMANTrafficking protein particle complex subunit 6B OS=Homo sapiens GN=TRAPPC6B PE=1 SV=1	Q86SZ2	8.91518e-66	100	198.364	94	94
B4DND9	GSCR2_HUMANGlioma tumor suppressor candidate region gene 2 OS=Homo sapiens GN=GLTSCR2 PE=1 SV=2	426	sp|Q9NZM5|GSCR2_HUMANGlioma tumor suppressor candidate region gene 2 protein OS=Homo sapiens GN=GLTSCR2 PE=1 SV=2	Q9NZM5	0	89	823.157	478	426
A0A024R2W4	DAG1_HUMANDystroglycan OS=Homo sapiens GN=DAG1 PE=1 SV=2	895	sp|Q14118|DAG1_HUMANDystroglycan OS=Homo sapiens GN=DAG1 PE=1 SV=2	Q14118	0	99	1810.04	895	894
K7EQL1	FA98C_HUMAN FAM98C OS=Homo sapiens GN=FAM98C PE=2 SV=1	181	sp|Q17RN3|FA98C_HUMANProtein FAM98C OS=Homo sapiens GN=FAM98C PE=2 SV=1	Q17RN3	6.71684e-77	100	236.884	124	124
Q6QN92	GCSH_HUMANGlycine cleavage system H mitochondrial OS=Homo sapiens GN=GCSH PE=1 SV=2	125	sp|P23434|GCSH_HUMANGlycine cleavage system H protein, mitochondrial OS=Homo sapiens GN=GCSH PE=1 SV=2	P23434	6.37321e-87	100	254.218	125	125
Q2M2H8	MGAL_HUMANProbable maltase-glucoamylase 2 OS=Homo sapiens GN=MGAM2 PE=2 SV=3	2515	sp|Q2M2H8|MGAL_HUMANProbable maltase-glucoamylase 2 OS=Homo sapiens GN=MGAM2 PE=2 SV=3	Q2M2H8	0	100	5160.5	2515	2515
B4DT46	CY24A_HUMANCytochrome b-245 light chain OS=Homo sapiens GN=CYBA PE=1 SV=3	131	sp|P13498|CY24A_HUMANCytochrome b-245 light chain OS=Homo sapiens GN=CYBA PE=1 SV=3	P13498	2.18574e-89	100	261.536	131	131
Q5VV42	CDKAL_HUMANThreonylcarbamoyladenosine tRNA methylthiotransferase OS=Homo sapiens GN=CDKAL1 PE=1 SV=1	579	sp|Q5VV42|CDKAL_HUMANThreonylcarbamoyladenosine tRNA methylthiotransferase OS=Homo sapiens GN=CDKAL1 PE=1 SV=1	Q5VV42	0	100	1211.05	579	579
E9PM82	ASCC1_HUMANActivating signal cointegrator 1 complex subunit 1 OS=Homo sapiens GN=ASCC1 PE=1 SV=1	124	sp|Q8N9N2|ASCC1_HUMANActivating signal cointegrator 1 complex subunit 1 OS=Homo sapiens GN=ASCC1 PE=1 SV=1	Q8N9N2	2.64872e-80	81	244.973	152	124
Q9Y6A5	TACC3_HUMANTransforming acidic coiled-coil-containing 3 OS=Homo sapiens GN=TACC3 PE=1 SV=1	838	sp|Q9Y6A5|TACC3_HUMANTransforming acidic coiled-coil-containing protein 3 OS=Homo sapiens GN=TACC3 PE=1 SV=1	Q9Y6A5	0	100	1701.8	838	838
Q9H5M4	KC1G1_HUMANCasein kinase I isoform gamma-1 OS=Homo sapiens GN=CSNK1G1 PE=1 SV=1	280	sp|Q9HCP0|KC1G1_HUMANCasein kinase I isoform gamma-1 OS=Homo sapiens GN=CSNK1G1 PE=1 SV=1	Q9HCP0	0	100	588.571	280	280
D3DR37	CEP55_HUMANCentrosomal of 55 kDa OS=Homo sapiens GN=CEP55 PE=1 SV=3	464	sp|Q53EZ4|CEP55_HUMANCentrosomal protein of 55 kDa OS=Homo sapiens GN=CEP55 PE=1 SV=3	Q53EZ4	0	99	926.391	464	462
Q8IY37	DHX37_HUMANProbable ATP-dependent RNA helicase DHX37 OS=Homo sapiens GN=DHX37 PE=1 SV=1	1157	sp|Q8IY37|DHX37_HUMANProbable ATP-dependent RNA helicase DHX37 OS=Homo sapiens GN=DHX37 PE=1 SV=1	Q8IY37	0	100	2362.8	1157	1157
Q96EX3	WDR34_HUMANWD repeat-containing 34 OS=Homo sapiens GN=WDR34 PE=1 SV=2	536	sp|Q96EX3|WDR34_HUMANWD repeat-containing protein 34 OS=Homo sapiens GN=WDR34 PE=1 SV=2	Q96EX3	0	100	1090.49	536	536
Q03169	TNAP2_HUMANTumor necrosis factor alpha-induced 2 OS=Homo sapiens GN=TNFAIP2 PE=2 SV=2	654	sp|Q03169|TNAP2_HUMANTumor necrosis factor alpha-induced protein 2 OS=Homo sapiens GN=TNFAIP2 PE=2 SV=2	Q03169	0	100	1327.38	654	654
O75911	DHRS3_HUMANShort-chain dehydrogenase reductase 3 OS=Homo sapiens GN=DHRS3 PE=1 SV=2	302	sp|O75911|DHRS3_HUMANShort-chain dehydrogenase/reductase 3 OS=Homo sapiens GN=DHRS3 PE=1 SV=2	O75911	0	100	625.935	302	302
A0A140VJE0	ADK_HUMANAdenosine kinase OS=Homo sapiens GN=ADK PE=1 SV=2	345	sp|P55263|ADK_HUMANAdenosine kinase OS=Homo sapiens GN=ADK PE=1 SV=2	P55263	0	100	715.687	343	343
H0UI22	SYRM_HUMANProbable arginine--tRNA mitochondrial OS=Homo sapiens GN=RARS2 PE=1 SV=1	403	sp|Q5T160|SYRM_HUMANProbable arginine--tRNA ligase, mitochondrial OS=Homo sapiens GN=RARS2 PE=1 SV=1	Q5T160	0	100	838.565	403	403
A8KAQ3	SORT_HUMANSortilin OS=Homo sapiens GN=SORT1 PE=1 SV=3	831	sp|Q99523|SORT_HUMANSortilin OS=Homo sapiens GN=SORT1 PE=1 SV=3	Q99523	0	99	1719.9	831	828
A0A0A0MTB0	SERC5_HUMANSerine incorporator 5 OS=Homo sapiens GN=SERINC5 PE=2 SV=1	417	sp|Q86VE9|SERC5_HUMANSerine incorporator 5 OS=Homo sapiens GN=SERINC5 PE=2 SV=1	Q86VE9	0	99	849.351	413	412
P08582	TRFM_HUMANMelanotransferrin OS=Homo sapiens GN=MELTF PE=1 SV=2	738	sp|P08582|TRFM_HUMANMelanotransferrin OS=Homo sapiens GN=MELTF PE=1 SV=2	P08582	0	100	1528.84	738	738
Q12872	SFSWA_HUMANSplicing suppressor of white-apricot homolog OS=Homo sapiens GN=SFSWAP PE=1 SV=3	951	sp|Q12872|SFSWA_HUMANSplicing factor, suppressor of white-apricot homolog OS=Homo sapiens GN=SFSWAP PE=1 SV=3	Q12872	0	100	1933.3	951	951
A0A087X1T2	SRBP2_HUMANSterol regulatory element-binding 2 OS=Homo sapiens GN=SREBF2 PE=1 SV=2	654	sp|Q12772|SRBP2_HUMANSterol regulatory element-binding protein 2 OS=Homo sapiens GN=SREBF2 PE=1 SV=2	Q12772	0	95	1129.01	596	570
D6RIZ4	MFS10_HUMANMajor facilitator superfamily domain-containing 10 OS=Homo sapiens GN=MFSD10 PE=1 SV=1	356	sp|Q14728|MFS10_HUMANMajor facilitator superfamily domain-containing protein 10 OS=Homo sapiens GN=MFSD10 PE=1 SV=1	Q14728	0	100	672.929	342	342
Q14517	FAT1_HUMANProtocadherin Fat 1 OS=Homo sapiens GN=FAT1 PE=1 SV=2	4588	sp|Q14517|FAT1_HUMANProtocadherin Fat 1 OS=Homo sapiens GN=FAT1 PE=1 SV=2	Q14517	0	100	9484.75	4588	4588
O00767	ACOD_HUMANAcyl- desaturase OS=Homo sapiens GN=SCD PE=1 SV=2	359	sp|O00767|ACOD_HUMANAcyl-CoA desaturase OS=Homo sapiens GN=SCD PE=1 SV=2	O00767	0	100	748.429	359	359
P53609	PGTB1_HUMANGeranylgeranyl transferase type-1 subunit beta OS=Homo sapiens GN=PGGT1B PE=1 SV=2	377	sp|P53609|PGTB1_HUMANGeranylgeranyl transferase type-1 subunit beta OS=Homo sapiens GN=PGGT1B PE=1 SV=2	P53609	0	100	788.489	377	377
P52735	VAV2_HUMANGuanine nucleotide exchange factor VAV2 OS=Homo sapiens GN=VAV2 PE=1 SV=2	878	sp|P52735|VAV2_HUMANGuanine nucleotide exchange factor VAV2 OS=Homo sapiens GN=VAV2 PE=1 SV=2	P52735	0	100	1839.7	878	878
B3KXW2	ZN532_HUMANZinc finger 532 OS=Homo sapiens GN=ZNF532 PE=1 SV=2	1301	sp|Q9HCE3|ZN532_HUMANZinc finger protein 532 OS=Homo sapiens GN=ZNF532 PE=1 SV=2	Q9HCE3	0	99	2678.28	1301	1300
Q52LW3	RHG29_HUMANRho GTPase-activating 29 OS=Homo sapiens GN=ARHGAP29 PE=1 SV=2	1261	sp|Q52LW3|RHG29_HUMANRho GTPase-activating protein 29 OS=Homo sapiens GN=ARHGAP29 PE=1 SV=2	Q52LW3	0	100	2604.32	1261	1261
Q6PJ25	AT11A_HUMANProbable phospholipid-transporting ATPase IH OS=Homo sapiens GN=ATP11A PE=1 SV=3	934	sp|P98196|AT11A_HUMANProbable phospholipid-transporting ATPase IH OS=Homo sapiens GN=ATP11A PE=1 SV=3	P98196	0	99	1929.07	933	929
Q9Y4B5	MTCL1_HUMANMicrotubule cross-linking factor 1 OS=Homo sapiens GN=MTCL1 PE=1 SV=5	1905	sp|Q9Y4B5|MTCL1_HUMANMicrotubule cross-linking factor 1 OS=Homo sapiens GN=MTCL1 PE=1 SV=5	Q9Y4B5	0	100	3846.97	1905	1905
Q09472	EP300_HUMANHistone acetyltransferase p300 OS=Homo sapiens GN=EP300 PE=1 SV=2	2414	sp|Q09472|EP300_HUMANHistone acetyltransferase p300 OS=Homo sapiens GN=EP300 PE=1 SV=2	Q09472	0	100	4929	2414	2414
O15230	LAMA5_HUMANLaminin subunit alpha-5 OS=Homo sapiens GN=LAMA5 PE=1 SV=8	3695	sp|O15230|LAMA5_HUMANLaminin subunit alpha-5 OS=Homo sapiens GN=LAMA5 PE=1 SV=8	O15230	0	100	7524.47	3695	3695

## Sheet: protein2go
GO function annotation and analysis different expressed proteins of OXA vs. control protein2go
SeqName	Hit_Desc	GO_Group	GO_ID	Term
P62269	RS18_HUMAN40S ribosomal S18 OS=Homo sapiens GN=RPS18 PE=1 SV=3	C	GO:0005654	nucleoplasm
P62269	RS18_HUMAN40S ribosomal S18 OS=Homo sapiens GN=RPS18 PE=1 SV=3	C	GO:0005925	focal adhesion
P62269	RS18_HUMAN40S ribosomal S18 OS=Homo sapiens GN=RPS18 PE=1 SV=3	C	GO:0016020	membrane
P62269	RS18_HUMAN40S ribosomal S18 OS=Homo sapiens GN=RPS18 PE=1 SV=3	C	GO:0022627	cytosolic small ribosomal subunit
P62269	RS18_HUMAN40S ribosomal S18 OS=Homo sapiens GN=RPS18 PE=1 SV=3	C	GO:0070062	extracellular vesicular exosome
P62269	RS18_HUMAN40S ribosomal S18 OS=Homo sapiens GN=RPS18 PE=1 SV=3	F	GO:0003735	structural constituent of ribosome
P62269	RS18_HUMAN40S ribosomal S18 OS=Homo sapiens GN=RPS18 PE=1 SV=3	F	GO:0005515	protein binding
P62269	RS18_HUMAN40S ribosomal S18 OS=Homo sapiens GN=RPS18 PE=1 SV=3	N	GO:0044822
P62269	RS18_HUMAN40S ribosomal S18 OS=Homo sapiens GN=RPS18 PE=1 SV=3	P	GO:0000184	nuclear-transcribed mRNA catabolic process, nonsense-mediated decay
P62269	RS18_HUMAN40S ribosomal S18 OS=Homo sapiens GN=RPS18 PE=1 SV=3	P	GO:0006364	rRNA processing
P62269	RS18_HUMAN40S ribosomal S18 OS=Homo sapiens GN=RPS18 PE=1 SV=3	P	GO:0006413	translational initiation
P62269	RS18_HUMAN40S ribosomal S18 OS=Homo sapiens GN=RPS18 PE=1 SV=3	P	GO:0006614	SRP-dependent cotranslational protein targeting to membrane
P62269	RS18_HUMAN40S ribosomal S18 OS=Homo sapiens GN=RPS18 PE=1 SV=3	P	GO:0019083	viral transcription
O43678	NDUA2_HUMANNADH dehydrogenase	C	GO:0005747	mitochondrial respiratory chain complex I
O43678	NDUA2_HUMANNADH dehydrogenase	P	GO:0006120	mitochondrial electron transport, NADH to ubiquinone
O43678	NDUA2_HUMANNADH dehydrogenase	P	GO:0032981	mitochondrial respiratory chain complex I assembly
P63173	RL38_HUMAN60S ribosomal L38 OS=Homo sapiens GN=RPL38 PE=1 SV=2	C	GO:0005925	focal adhesion
P63173	RL38_HUMAN60S ribosomal L38 OS=Homo sapiens GN=RPL38 PE=1 SV=2	C	GO:0022625	cytosolic large ribosomal subunit
P63173	RL38_HUMAN60S ribosomal L38 OS=Homo sapiens GN=RPL38 PE=1 SV=2	F	GO:0003723	RNA binding
P63173	RL38_HUMAN60S ribosomal L38 OS=Homo sapiens GN=RPL38 PE=1 SV=2	F	GO:0003735	structural constituent of ribosome
P63173	RL38_HUMAN60S ribosomal L38 OS=Homo sapiens GN=RPL38 PE=1 SV=2	P	GO:0000184	nuclear-transcribed mRNA catabolic process, nonsense-mediated decay
P63173	RL38_HUMAN60S ribosomal L38 OS=Homo sapiens GN=RPL38 PE=1 SV=2	P	GO:0006364	rRNA processing
P63173	RL38_HUMAN60S ribosomal L38 OS=Homo sapiens GN=RPL38 PE=1 SV=2	P	GO:0006413	translational initiation
P63173	RL38_HUMAN60S ribosomal L38 OS=Homo sapiens GN=RPL38 PE=1 SV=2	P	GO:0006614	SRP-dependent cotranslational protein targeting to membrane
P63173	RL38_HUMAN60S ribosomal L38 OS=Homo sapiens GN=RPL38 PE=1 SV=2	P	GO:0019083	viral transcription
P63173	RL38_HUMAN60S ribosomal L38 OS=Homo sapiens GN=RPL38 PE=1 SV=2	P	GO:0022618	ribonucleoprotein complex assembly
P63173	RL38_HUMAN60S ribosomal L38 OS=Homo sapiens GN=RPL38 PE=1 SV=2	P	GO:0032501	multicellular organismal process
P62273	RS29_HUMAN40S ribosomal S29 OS=Homo sapiens GN=RPS29 PE=1 SV=2	C	GO:0005654	nucleoplasm
P62273	RS29_HUMAN40S ribosomal S29 OS=Homo sapiens GN=RPS29 PE=1 SV=2	C	GO:0005925	focal adhesion
P62273	RS29_HUMAN40S ribosomal S29 OS=Homo sapiens GN=RPS29 PE=1 SV=2	C	GO:0022627	cytosolic small ribosomal subunit
P62273	RS29_HUMAN40S ribosomal S29 OS=Homo sapiens GN=RPS29 PE=1 SV=2	C	GO:0070062	extracellular vesicular exosome
P62273	RS29_HUMAN40S ribosomal S29 OS=Homo sapiens GN=RPS29 PE=1 SV=2	F	GO:0003735	structural constituent of ribosome
P62273	RS29_HUMAN40S ribosomal S29 OS=Homo sapiens GN=RPS29 PE=1 SV=2	F	GO:0008270	zinc ion binding
P62273	RS29_HUMAN40S ribosomal S29 OS=Homo sapiens GN=RPS29 PE=1 SV=2	P	GO:0000184	nuclear-transcribed mRNA catabolic process, nonsense-mediated decay
P62273	RS29_HUMAN40S ribosomal S29 OS=Homo sapiens GN=RPS29 PE=1 SV=2	P	GO:0006364	rRNA processing
P62273	RS29_HUMAN40S ribosomal S29 OS=Homo sapiens GN=RPS29 PE=1 SV=2	P	GO:0006413	translational initiation
P62273	RS29_HUMAN40S ribosomal S29 OS=Homo sapiens GN=RPS29 PE=1 SV=2	P	GO:0006614	SRP-dependent cotranslational protein targeting to membrane
P62273	RS29_HUMAN40S ribosomal S29 OS=Homo sapiens GN=RPS29 PE=1 SV=2	P	GO:0019083	viral transcription
P62857	RS28_HUMAN40S ribosomal S28 OS=Homo sapiens GN=RPS28 PE=1 SV=1	C	GO:0005654	nucleoplasm
P62857	RS28_HUMAN40S ribosomal S28 OS=Homo sapiens GN=RPS28 PE=1 SV=1	C	GO:0022627	cytosolic small ribosomal subunit
P62857	RS28_HUMAN40S ribosomal S28 OS=Homo sapiens GN=RPS28 PE=1 SV=1	C	GO:0070062	extracellular vesicular exosome
P62857	RS28_HUMAN40S ribosomal S28 OS=Homo sapiens GN=RPS28 PE=1 SV=1	F	GO:0003735	structural constituent of ribosome
P62857	RS28_HUMAN40S ribosomal S28 OS=Homo sapiens GN=RPS28 PE=1 SV=1	F	GO:0005515	protein binding
P62857	RS28_HUMAN40S ribosomal S28 OS=Homo sapiens GN=RPS28 PE=1 SV=1	N	GO:0044822
P62857	RS28_HUMAN40S ribosomal S28 OS=Homo sapiens GN=RPS28 PE=1 SV=1	P	GO:0000184	nuclear-transcribed mRNA catabolic process, nonsense-mediated decay
P62857	RS28_HUMAN40S ribosomal S28 OS=Homo sapiens GN=RPS28 PE=1 SV=1	P	GO:0006364	rRNA processing
P62857	RS28_HUMAN40S ribosomal S28 OS=Homo sapiens GN=RPS28 PE=1 SV=1	P	GO:0006413	translational initiation
P62857	RS28_HUMAN40S ribosomal S28 OS=Homo sapiens GN=RPS28 PE=1 SV=1	P	GO:0006614	SRP-dependent cotranslational protein targeting to membrane
P62857	RS28_HUMAN40S ribosomal S28 OS=Homo sapiens GN=RPS28 PE=1 SV=1	P	GO:0019083	viral transcription
P62857	RS28_HUMAN40S ribosomal S28 OS=Homo sapiens GN=RPS28 PE=1 SV=1	P	GO:0042274	ribosomal small subunit biogenesis
B3KS36	RL3_HUMAN60S ribosomal L3 OS=Homo sapiens GN=RPL3 PE=1 SV=2	C	GO:0005654	nucleoplasm
B3KS36	RL3_HUMAN60S ribosomal L3 OS=Homo sapiens GN=RPL3 PE=1 SV=2	C	GO:0005730	nucleolus
B3KS36	RL3_HUMAN60S ribosomal L3 OS=Homo sapiens GN=RPL3 PE=1 SV=2	C	GO:0005925	focal adhesion
B3KS36	RL3_HUMAN60S ribosomal L3 OS=Homo sapiens GN=RPL3 PE=1 SV=2	C	GO:0022625	cytosolic large ribosomal subunit
B3KS36	RL3_HUMAN60S ribosomal L3 OS=Homo sapiens GN=RPL3 PE=1 SV=2	C	GO:0070062	extracellular vesicular exosome
B3KS36	RL3_HUMAN60S ribosomal L3 OS=Homo sapiens GN=RPL3 PE=1 SV=2	F	GO:0003735	structural constituent of ribosome
B3KS36	RL3_HUMAN60S ribosomal L3 OS=Homo sapiens GN=RPL3 PE=1 SV=2	F	GO:0005515	protein binding
B3KS36	RL3_HUMAN60S ribosomal L3 OS=Homo sapiens GN=RPL3 PE=1 SV=2	N	GO:0044822
B3KS36	RL3_HUMAN60S ribosomal L3 OS=Homo sapiens GN=RPL3 PE=1 SV=2	P	GO:0006412	translation
B3KS36	RL3_HUMAN60S ribosomal L3 OS=Homo sapiens GN=RPL3 PE=1 SV=2	P	GO:0016070	RNA metabolic process
B3KS36	RL3_HUMAN60S ribosomal L3 OS=Homo sapiens GN=RPL3 PE=1 SV=2	P	GO:0042254	ribosome biogenesis
B5BU78	TP4A1_HUMAN tyrosine phosphatase type IVA 1 OS=Homo sapiens GN=PTP4A1 PE=1 SV=2	C	GO:0005634	nucleus
B5BU78	TP4A1_HUMAN tyrosine phosphatase type IVA 1 OS=Homo sapiens GN=PTP4A1 PE=1 SV=2	C	GO:0005737	cytoplasm
B5BU78	TP4A1_HUMAN tyrosine phosphatase type IVA 1 OS=Homo sapiens GN=PTP4A1 PE=1 SV=2	C	GO:0009898	internal side of plasma membrane
B5BU78	TP4A1_HUMAN tyrosine phosphatase type IVA 1 OS=Homo sapiens GN=PTP4A1 PE=1 SV=2	C	GO:0015630	microtubule cytoskeleton
B5BU78	TP4A1_HUMAN tyrosine phosphatase type IVA 1 OS=Homo sapiens GN=PTP4A1 PE=1 SV=2	C	GO:0044430	cytoskeletal part
B5BU78	TP4A1_HUMAN tyrosine phosphatase type IVA 1 OS=Homo sapiens GN=PTP4A1 PE=1 SV=2	C	GO:0070062	extracellular vesicular exosome
B5BU78	TP4A1_HUMAN tyrosine phosphatase type IVA 1 OS=Homo sapiens GN=PTP4A1 PE=1 SV=2	F	GO:0004725	protein tyrosine phosphatase activity
B5BU78	TP4A1_HUMAN tyrosine phosphatase type IVA 1 OS=Homo sapiens GN=PTP4A1 PE=1 SV=2	F	GO:0008138	protein tyrosine/serine/threonine phosphatase activity
B5BU78	TP4A1_HUMAN tyrosine phosphatase type IVA 1 OS=Homo sapiens GN=PTP4A1 PE=1 SV=2	P	GO:0006470	protein dephosphorylation
B5BU78	TP4A1_HUMAN tyrosine phosphatase type IVA 1 OS=Homo sapiens GN=PTP4A1 PE=1 SV=2	P	GO:0043542	endothelial cell migration
B5BU78	TP4A1_HUMAN tyrosine phosphatase type IVA 1 OS=Homo sapiens GN=PTP4A1 PE=1 SV=2	P	GO:0050794	regulation of cellular process
B5BU78	TP4A1_HUMAN tyrosine phosphatase type IVA 1 OS=Homo sapiens GN=PTP4A1 PE=1 SV=2	P	GO:0006570	tyrosine metabolic process
F8VZJ2	NACA_HUMANNascent polypeptide-associated complex subunit alpha OS=Homo sapiens GN=NACA PE=1 SV=1	C	GO:0005854	nascent polypeptide-associated complex
F8VZJ2	NACA_HUMANNascent polypeptide-associated complex subunit alpha OS=Homo sapiens GN=NACA PE=1 SV=1	C	GO:0070062	extracellular vesicular exosome
F8VZJ2	NACA_HUMANNascent polypeptide-associated complex subunit alpha OS=Homo sapiens GN=NACA PE=1 SV=1	F	GO:0005515	protein binding
F8VZJ2	NACA_HUMANNascent polypeptide-associated complex subunit alpha OS=Homo sapiens GN=NACA PE=1 SV=1	P	GO:0006412	translation
F8VZJ2	NACA_HUMANNascent polypeptide-associated complex subunit alpha OS=Homo sapiens GN=NACA PE=1 SV=1	P	GO:0048522	positive regulation of cellular process
F8VZJ2	NACA_HUMANNascent polypeptide-associated complex subunit alpha OS=Homo sapiens GN=NACA PE=1 SV=1	P	GO:0048523	negative regulation of cellular process
F8VZJ2	NACA_HUMANNascent polypeptide-associated complex subunit alpha OS=Homo sapiens GN=NACA PE=1 SV=1	P	GO:0048641	regulation of skeletal muscle tissue development
F8VZJ2	NACA_HUMANNascent polypeptide-associated complex subunit alpha OS=Homo sapiens GN=NACA PE=1 SV=1	P	GO:0051094	positive regulation of developmental process
F8VZJ2	NACA_HUMANNascent polypeptide-associated complex subunit alpha OS=Homo sapiens GN=NACA PE=1 SV=1	P	GO:0051240	positive regulation of multicellular organismal process
F8VZJ2	NACA_HUMANNascent polypeptide-associated complex subunit alpha OS=Homo sapiens GN=NACA PE=1 SV=1	P	GO:1901213	regulation of transcription from RNA polymerase II promoter involved in heart development
A0A024RDF4	HNRPD_HUMANHeterogeneous nuclear ribonucleo D0 OS=Homo sapiens GN=HNRNPD PE=1 SV=1	C	GO:0005654	nucleoplasm
A0A024RDF4	HNRPD_HUMANHeterogeneous nuclear ribonucleo D0 OS=Homo sapiens GN=HNRNPD PE=1 SV=1	C	GO:0030529	ribonucleoprotein complex
A0A024RDF4	HNRPD_HUMANHeterogeneous nuclear ribonucleo D0 OS=Homo sapiens GN=HNRNPD PE=1 SV=1	C	GO:0070062	extracellular vesicular exosome
A0A024RDF4	HNRPD_HUMANHeterogeneous nuclear ribonucleo D0 OS=Homo sapiens GN=HNRNPD PE=1 SV=1	F	GO:0000166	nucleotide binding
A0A024RDF4	HNRPD_HUMANHeterogeneous nuclear ribonucleo D0 OS=Homo sapiens GN=HNRNPD PE=1 SV=1	F	GO:0005515	protein binding
A0A024RDF4	HNRPD_HUMANHeterogeneous nuclear ribonucleo D0 OS=Homo sapiens GN=HNRNPD PE=1 SV=1	F	GO:0042162	telomeric DNA binding
A0A024RDF4	HNRPD_HUMANHeterogeneous nuclear ribonucleo D0 OS=Homo sapiens GN=HNRNPD PE=1 SV=1	N	GO:0044822
A0A024RDF4	HNRPD_HUMANHeterogeneous nuclear ribonucleo D0 OS=Homo sapiens GN=HNRNPD PE=1 SV=1	P	GO:0006396	RNA processing
A0A024RDF4	HNRPD_HUMANHeterogeneous nuclear ribonucleo D0 OS=Homo sapiens GN=HNRNPD PE=1 SV=1	P	GO:0010629	negative regulation of gene expression
A0A024RDF4	HNRPD_HUMANHeterogeneous nuclear ribonucleo D0 OS=Homo sapiens GN=HNRNPD PE=1 SV=1	P	GO:0031324	negative regulation of cellular metabolic process
A0A024RDF4	HNRPD_HUMANHeterogeneous nuclear ribonucleo D0 OS=Homo sapiens GN=HNRNPD PE=1 SV=1	P	GO:0042752	regulation of circadian rhythm
A0A024RDF4	HNRPD_HUMANHeterogeneous nuclear ribonucleo D0 OS=Homo sapiens GN=HNRNPD PE=1 SV=1	P	GO:0043488	regulation of mRNA stability
A0A024RDF4	HNRPD_HUMANHeterogeneous nuclear ribonucleo D0 OS=Homo sapiens GN=HNRNPD PE=1 SV=1	P	GO:0044763	single-organism cellular process
A0A024RDF4	HNRPD_HUMANHeterogeneous nuclear ribonucleo D0 OS=Homo sapiens GN=HNRNPD PE=1 SV=1	P	GO:0045727	positive regulation of translation
A0A024RDF4	HNRPD_HUMANHeterogeneous nuclear ribonucleo D0 OS=Homo sapiens GN=HNRNPD PE=1 SV=1	P	GO:0048513	organ development
A0A024RDF4	HNRPD_HUMANHeterogeneous nuclear ribonucleo D0 OS=Homo sapiens GN=HNRNPD PE=1 SV=1	P	GO:0050658	RNA transport
A0A024RDF4	HNRPD_HUMANHeterogeneous nuclear ribonucleo D0 OS=Homo sapiens GN=HNRNPD PE=1 SV=1	P	GO:0051172	negative regulation of nitrogen compound metabolic process
A0A024RDF4	HNRPD_HUMANHeterogeneous nuclear ribonucleo D0 OS=Homo sapiens GN=HNRNPD PE=1 SV=1	P	GO:0051252	regulation of RNA metabolic process
A0A024RDF4	HNRPD_HUMANHeterogeneous nuclear ribonucleo D0 OS=Homo sapiens GN=HNRNPD PE=1 SV=1	P	GO:0071310	cellular response to organic substance
A0A024RDF4	HNRPD_HUMANHeterogeneous nuclear ribonucleo D0 OS=Homo sapiens GN=HNRNPD PE=1 SV=1	P	GO:0097167	circadian regulation of translation
A0A024RDF4	HNRPD_HUMANHeterogeneous nuclear ribonucleo D0 OS=Homo sapiens GN=HNRNPD PE=1 SV=1	P	GO:1901698	response to nitrogen compound
P17096	HMGA1_HUMANHigh mobility group HMG-I HMG-Y OS=Homo sapiens GN=HMGA1 PE=1 SV=3	C	GO:0005654	nucleoplasm
P17096	HMGA1_HUMANHigh mobility group HMG-I HMG-Y OS=Homo sapiens GN=HMGA1 PE=1 SV=3	C	GO:0005667	transcription factor complex
P17096	HMGA1_HUMANHigh mobility group HMG-I HMG-Y OS=Homo sapiens GN=HMGA1 PE=1 SV=3	C	GO:0005829	cytosol
P17096	HMGA1_HUMANHigh mobility group HMG-I HMG-Y OS=Homo sapiens GN=HMGA1 PE=1 SV=3	C	GO:0005925	focal adhesion
P17096	HMGA1_HUMANHigh mobility group HMG-I HMG-Y OS=Homo sapiens GN=HMGA1 PE=1 SV=3	C	GO:0035985	senescence-associated heterochromatin focus
P17096	HMGA1_HUMANHigh mobility group HMG-I HMG-Y OS=Homo sapiens GN=HMGA1 PE=1 SV=3	F	GO:0001228	RNA polymerase II transcription regulatory region sequence-specific DNA binding transcription factor activity involved in positive regulation of transcription
P17096	HMGA1_HUMANHigh mobility group HMG-I HMG-Y OS=Homo sapiens GN=HMGA1 PE=1 SV=3	F	GO:0003680	AT DNA binding
P17096	HMGA1_HUMANHigh mobility group HMG-I HMG-Y OS=Homo sapiens GN=HMGA1 PE=1 SV=3	F	GO:0003682	chromatin binding
P17096	HMGA1_HUMANHigh mobility group HMG-I HMG-Y OS=Homo sapiens GN=HMGA1 PE=1 SV=3	F	GO:0003906	DNA-(apurinic or apyrimidinic site) lyase activity
P17096	HMGA1_HUMANHigh mobility group HMG-I HMG-Y OS=Homo sapiens GN=HMGA1 PE=1 SV=3	F	GO:0019899	enzyme binding
P17096	HMGA1_HUMANHigh mobility group HMG-I HMG-Y OS=Homo sapiens GN=HMGA1 PE=1 SV=3	F	GO:0030374	ligand-dependent nuclear receptor transcription coactivator activity
P17096	HMGA1_HUMANHigh mobility group HMG-I HMG-Y OS=Homo sapiens GN=HMGA1 PE=1 SV=3	F	GO:0042975	peroxisome proliferator activated receptor binding
P17096	HMGA1_HUMANHigh mobility group HMG-I HMG-Y OS=Homo sapiens GN=HMGA1 PE=1 SV=3	F	GO:0046965	retinoid X receptor binding
P17096	HMGA1_HUMANHigh mobility group HMG-I HMG-Y OS=Homo sapiens GN=HMGA1 PE=1 SV=3	F	GO:0051575	5'-deoxyribose-5-phosphate lyase activity
P17096	HMGA1_HUMANHigh mobility group HMG-I HMG-Y OS=Homo sapiens GN=HMGA1 PE=1 SV=3	P	GO:0006284	base-excision repair
P17096	HMGA1_HUMANHigh mobility group HMG-I HMG-Y OS=Homo sapiens GN=HMGA1 PE=1 SV=3	P	GO:0006337	nucleosome disassembly
P17096	HMGA1_HUMANHigh mobility group HMG-I HMG-Y OS=Homo sapiens GN=HMGA1 PE=1 SV=3	P	GO:0006357	regulation of transcription from RNA polymerase II promoter
P17096	HMGA1_HUMANHigh mobility group HMG-I HMG-Y OS=Homo sapiens GN=HMGA1 PE=1 SV=3	P	GO:0006461	protein complex assembly
P17096	HMGA1_HUMANHigh mobility group HMG-I HMG-Y OS=Homo sapiens GN=HMGA1 PE=1 SV=3	P	GO:0008285	negative regulation of cell proliferation
P17096	HMGA1_HUMANHigh mobility group HMG-I HMG-Y OS=Homo sapiens GN=HMGA1 PE=1 SV=3	P	GO:0009615	response to virus
P17096	HMGA1_HUMANHigh mobility group HMG-I HMG-Y OS=Homo sapiens GN=HMGA1 PE=1 SV=3	P	GO:0030154	cell differentiation
P17096	HMGA1_HUMANHigh mobility group HMG-I HMG-Y OS=Homo sapiens GN=HMGA1 PE=1 SV=3	P	GO:0031936	negative regulation of chromatin silencing
P17096	HMGA1_HUMANHigh mobility group HMG-I HMG-Y OS=Homo sapiens GN=HMGA1 PE=1 SV=3	P	GO:0035986	senescence-associated heterochromatin focus assembly
P17096	HMGA1_HUMANHigh mobility group HMG-I HMG-Y OS=Homo sapiens GN=HMGA1 PE=1 SV=3	P	GO:0051169	nuclear transport
P17096	HMGA1_HUMANHigh mobility group HMG-I HMG-Y OS=Homo sapiens GN=HMGA1 PE=1 SV=3	P	GO:0075713	establishment of integrated proviral latency
P17096	HMGA1_HUMANHigh mobility group HMG-I HMG-Y OS=Homo sapiens GN=HMGA1 PE=1 SV=3	P	GO:0090402	oncogene-induced cell senescence
P17096	HMGA1_HUMANHigh mobility group HMG-I HMG-Y OS=Homo sapiens GN=HMGA1 PE=1 SV=3	P	GO:2000774	positive regulation of cellular senescence
P17096	HMGA1_HUMANHigh mobility group HMG-I HMG-Y OS=Homo sapiens GN=HMGA1 PE=1 SV=3	P	GO:0045941	positive regulation of transcription, DNA-dependent
P17096	HMGA1_HUMANHigh mobility group HMG-I HMG-Y OS=Homo sapiens GN=HMGA1 PE=1 SV=3	P	GO:0007165	signal transduction
A0A024R8K7	ITB4_HUMANIntegrin beta-4 OS=Homo sapiens GN=ITGB4 PE=1 SV=5	C	GO:0005634	nucleus
A0A024R8K7	ITB4_HUMANIntegrin beta-4 OS=Homo sapiens GN=ITGB4 PE=1 SV=5	C	GO:0008305	integrin complex
A0A024R8K7	ITB4_HUMANIntegrin beta-4 OS=Homo sapiens GN=ITGB4 PE=1 SV=5	C	GO:0009986	cell surface
A0A024R8K7	ITB4_HUMANIntegrin beta-4 OS=Homo sapiens GN=ITGB4 PE=1 SV=5	C	GO:0030056	hemidesmosome
A0A024R8K7	ITB4_HUMANIntegrin beta-4 OS=Homo sapiens GN=ITGB4 PE=1 SV=5	C	GO:0031252	cell leading edge
A0A024R8K7	ITB4_HUMANIntegrin beta-4 OS=Homo sapiens GN=ITGB4 PE=1 SV=5	C	GO:0042995	cell projection
A0A024R8K7	ITB4_HUMANIntegrin beta-4 OS=Homo sapiens GN=ITGB4 PE=1 SV=5	C	GO:0044444	cytoplasmic part
A0A024R8K7	ITB4_HUMANIntegrin beta-4 OS=Homo sapiens GN=ITGB4 PE=1 SV=5	C	GO:0070062	extracellular vesicular exosome
A0A024R8K7	ITB4_HUMANIntegrin beta-4 OS=Homo sapiens GN=ITGB4 PE=1 SV=5	F	GO:0001664	G-protein coupled receptor binding
A0A024R8K7	ITB4_HUMANIntegrin beta-4 OS=Homo sapiens GN=ITGB4 PE=1 SV=5	F	GO:0004872	receptor activity
A0A024R8K7	ITB4_HUMANIntegrin beta-4 OS=Homo sapiens GN=ITGB4 PE=1 SV=5	F	GO:0031994	insulin-like growth factor I binding
A0A024R8K7	ITB4_HUMANIntegrin beta-4 OS=Homo sapiens GN=ITGB4 PE=1 SV=5	F	GO:0038132	neuregulin binding
A0A024R8K7	ITB4_HUMANIntegrin beta-4 OS=Homo sapiens GN=ITGB4 PE=1 SV=5	P	GO:0002376	immune system process
A0A024R8K7	ITB4_HUMANIntegrin beta-4 OS=Homo sapiens GN=ITGB4 PE=1 SV=5	P	GO:0006914	autophagy
A0A024R8K7	ITB4_HUMANIntegrin beta-4 OS=Homo sapiens GN=ITGB4 PE=1 SV=5	P	GO:0007160	cell-matrix adhesion
A0A024R8K7	ITB4_HUMANIntegrin beta-4 OS=Homo sapiens GN=ITGB4 PE=1 SV=5	P	GO:0007229	integrin-mediated signaling pathway
A0A024R8K7	ITB4_HUMANIntegrin beta-4 OS=Homo sapiens GN=ITGB4 PE=1 SV=5	P	GO:0009611	response to wounding
A0A024R8K7	ITB4_HUMANIntegrin beta-4 OS=Homo sapiens GN=ITGB4 PE=1 SV=5	P	GO:0016477	cell migration
A0A024R8K7	ITB4_HUMANIntegrin beta-4 OS=Homo sapiens GN=ITGB4 PE=1 SV=5	P	GO:0030198	extracellular matrix organization
A0A024R8K7	ITB4_HUMANIntegrin beta-4 OS=Homo sapiens GN=ITGB4 PE=1 SV=5	P	GO:0031323	regulation of cellular metabolic process
A0A024R8K7	ITB4_HUMANIntegrin beta-4 OS=Homo sapiens GN=ITGB4 PE=1 SV=5	P	GO:0031581	hemidesmosome assembly
A0A024R8K7	ITB4_HUMANIntegrin beta-4 OS=Homo sapiens GN=ITGB4 PE=1 SV=5	P	GO:0035878	nail development
A0A024R8K7	ITB4_HUMANIntegrin beta-4 OS=Homo sapiens GN=ITGB4 PE=1 SV=5	P	GO:0042221	response to chemical stimulus
A0A024R8K7	ITB4_HUMANIntegrin beta-4 OS=Homo sapiens GN=ITGB4 PE=1 SV=5	P	GO:0043588	skin development
A0A024R8K7	ITB4_HUMANIntegrin beta-4 OS=Homo sapiens GN=ITGB4 PE=1 SV=5	P	GO:0048333	mesodermal cell differentiation
A0A024R8K7	ITB4_HUMANIntegrin beta-4 OS=Homo sapiens GN=ITGB4 PE=1 SV=5	P	GO:0048522	positive regulation of cellular process
A0A024R8K7	ITB4_HUMANIntegrin beta-4 OS=Homo sapiens GN=ITGB4 PE=1 SV=5	P	GO:0048523	negative regulation of cellular process
A0A024R8K7	ITB4_HUMANIntegrin beta-4 OS=Homo sapiens GN=ITGB4 PE=1 SV=5	P	GO:0048565	digestive tract development
A0A024R8K7	ITB4_HUMANIntegrin beta-4 OS=Homo sapiens GN=ITGB4 PE=1 SV=5	P	GO:0050793	regulation of developmental process
A0A024R8K7	ITB4_HUMANIntegrin beta-4 OS=Homo sapiens GN=ITGB4 PE=1 SV=5	P	GO:0051239	regulation of multicellular organismal process
A0A024R8K7	ITB4_HUMANIntegrin beta-4 OS=Homo sapiens GN=ITGB4 PE=1 SV=5	P	GO:0060255	regulation of macromolecule metabolic process
A0A024R8K7	ITB4_HUMANIntegrin beta-4 OS=Homo sapiens GN=ITGB4 PE=1 SV=5	P	GO:0065008	regulation of biological quality
A0A024R8K7	ITB4_HUMANIntegrin beta-4 OS=Homo sapiens GN=ITGB4 PE=1 SV=5	P	GO:0072001	renal system development
A0A024R8K7	ITB4_HUMANIntegrin beta-4 OS=Homo sapiens GN=ITGB4 PE=1 SV=5	P	GO:0097186	amelogenesis
A0A024R8K7	ITB4_HUMANIntegrin beta-4 OS=Homo sapiens GN=ITGB4 PE=1 SV=5	N	GO:0098602
A0A024R8K7	ITB4_HUMANIntegrin beta-4 OS=Homo sapiens GN=ITGB4 PE=1 SV=5	N	GO:0098609
Q5TEC6	H32_HUMANHistone OS=Homo sapiens GN=HIST2H3A PE=1 SV=3	C	GO:0000775	chromosome, centromeric region
Q5TEC6	H32_HUMANHistone OS=Homo sapiens GN=HIST2H3A PE=1 SV=3	C	GO:0000784	nuclear chromosome, telomeric region
Q5TEC6	H32_HUMANHistone OS=Homo sapiens GN=HIST2H3A PE=1 SV=3	C	GO:0000788	nuclear nucleosome
Q5TEC6	H32_HUMANHistone OS=Homo sapiens GN=HIST2H3A PE=1 SV=3	C	GO:0005654	nucleoplasm
Q5TEC6	H32_HUMANHistone OS=Homo sapiens GN=HIST2H3A PE=1 SV=3	C	GO:0005719	nuclear euchromatin
Q5TEC6	H32_HUMANHistone OS=Homo sapiens GN=HIST2H3A PE=1 SV=3	C	GO:0016020	membrane
Q5TEC6	H32_HUMANHistone OS=Homo sapiens GN=HIST2H3A PE=1 SV=3	C	GO:0070062	extracellular vesicular exosome
Q5TEC6	H32_HUMANHistone OS=Homo sapiens GN=HIST2H3A PE=1 SV=3	F	GO:0000979	RNA polymerase II core promoter sequence-specific DNA binding
Q5TEC6	H32_HUMANHistone OS=Homo sapiens GN=HIST2H3A PE=1 SV=3	F	GO:0000980	RNA polymerase II distal enhancer sequence-specific DNA binding
Q5TEC6	H32_HUMANHistone OS=Homo sapiens GN=HIST2H3A PE=1 SV=3	F	GO:0031492	nucleosomal DNA binding
Q5TEC6	H32_HUMANHistone OS=Homo sapiens GN=HIST2H3A PE=1 SV=3	F	GO:0042393	histone binding
Q5TEC6	H32_HUMANHistone OS=Homo sapiens GN=HIST2H3A PE=1 SV=3	F	GO:0046982	protein heterodimerization activity
Q5TEC6	H32_HUMANHistone OS=Homo sapiens GN=HIST2H3A PE=1 SV=3	P	GO:0000183	chromatin silencing at rDNA
Q5TEC6	H32_HUMANHistone OS=Homo sapiens GN=HIST2H3A PE=1 SV=3	P	GO:0002230	positive regulation of defense response to virus by host
Q5TEC6	H32_HUMANHistone OS=Homo sapiens GN=HIST2H3A PE=1 SV=3	P	GO:0006303	double-strand break repair via nonhomologous end joining
Q5TEC6	H32_HUMANHistone OS=Homo sapiens GN=HIST2H3A PE=1 SV=3	P	GO:0006335	DNA replication-dependent nucleosome assembly
Q5TEC6	H32_HUMANHistone OS=Homo sapiens GN=HIST2H3A PE=1 SV=3	P	GO:0006336	DNA replication-independent nucleosome assembly
Q5TEC6	H32_HUMANHistone OS=Homo sapiens GN=HIST2H3A PE=1 SV=3	P	GO:0007596	blood coagulation
Q5TEC6	H32_HUMANHistone OS=Homo sapiens GN=HIST2H3A PE=1 SV=3	P	GO:0016233	telomere capping
Q5TEC6	H32_HUMANHistone OS=Homo sapiens GN=HIST2H3A PE=1 SV=3	P	GO:0030307	positive regulation of cell growth
Q5TEC6	H32_HUMANHistone OS=Homo sapiens GN=HIST2H3A PE=1 SV=3	P	GO:0031047	gene silencing by RNA
Q5TEC6	H32_HUMANHistone OS=Homo sapiens GN=HIST2H3A PE=1 SV=3	P	GO:0032460	negative regulation of protein oligomerization
Q5TEC6	H32_HUMANHistone OS=Homo sapiens GN=HIST2H3A PE=1 SV=3	P	GO:0044267	cellular protein metabolic process
Q5TEC6	H32_HUMANHistone OS=Homo sapiens GN=HIST2H3A PE=1 SV=3	P	GO:0045815	positive regulation of gene expression, epigenetic
Q5TEC6	H32_HUMANHistone OS=Homo sapiens GN=HIST2H3A PE=1 SV=3	P	GO:0051290	protein heterotetramerization
Q5TEC6	H32_HUMANHistone OS=Homo sapiens GN=HIST2H3A PE=1 SV=3	P	GO:0060968	regulation of gene silencing
Q5TEC6	H32_HUMANHistone OS=Homo sapiens GN=HIST2H3A PE=1 SV=3	N	GO:0098792
J3QR09	RL19_HUMAN60S ribosomal L19 OS=Homo sapiens GN=RPL19 PE=1 SV=1	C	GO:0005730	nucleolus
J3QR09	RL19_HUMAN60S ribosomal L19 OS=Homo sapiens GN=RPL19 PE=1 SV=1	C	GO:0005925	focal adhesion
J3QR09	RL19_HUMAN60S ribosomal L19 OS=Homo sapiens GN=RPL19 PE=1 SV=1	C	GO:0016020	membrane
J3QR09	RL19_HUMAN60S ribosomal L19 OS=Homo sapiens GN=RPL19 PE=1 SV=1	C	GO:0022625	cytosolic large ribosomal subunit
J3QR09	RL19_HUMAN60S ribosomal L19 OS=Homo sapiens GN=RPL19 PE=1 SV=1	F	GO:0003735	structural constituent of ribosome
J3QR09	RL19_HUMAN60S ribosomal L19 OS=Homo sapiens GN=RPL19 PE=1 SV=1	F	GO:0005515	protein binding
J3QR09	RL19_HUMAN60S ribosomal L19 OS=Homo sapiens GN=RPL19 PE=1 SV=1	N	GO:0044822
J3QR09	RL19_HUMAN60S ribosomal L19 OS=Homo sapiens GN=RPL19 PE=1 SV=1	P	GO:0000184	nuclear-transcribed mRNA catabolic process, nonsense-mediated decay
J3QR09	RL19_HUMAN60S ribosomal L19 OS=Homo sapiens GN=RPL19 PE=1 SV=1	P	GO:0006364	rRNA processing
J3QR09	RL19_HUMAN60S ribosomal L19 OS=Homo sapiens GN=RPL19 PE=1 SV=1	P	GO:0006413	translational initiation
J3QR09	RL19_HUMAN60S ribosomal L19 OS=Homo sapiens GN=RPL19 PE=1 SV=1	P	GO:0006614	SRP-dependent cotranslational protein targeting to membrane
J3QR09	RL19_HUMAN60S ribosomal L19 OS=Homo sapiens GN=RPL19 PE=1 SV=1	P	GO:0019083	viral transcription
A8K7D9	IMA1_HUMANImportin subunit alpha-1 OS=Homo sapiens GN=KPNA2 PE=1 SV=1	C	GO:0005829	cytosol
A8K7D9	IMA1_HUMANImportin subunit alpha-1 OS=Homo sapiens GN=KPNA2 PE=1 SV=1	C	GO:0016020	membrane
A8K7D9	IMA1_HUMANImportin subunit alpha-1 OS=Homo sapiens GN=KPNA2 PE=1 SV=1	F	GO:0008139	nuclear localization sequence binding
A8K7D9	IMA1_HUMANImportin subunit alpha-1 OS=Homo sapiens GN=KPNA2 PE=1 SV=1	F	GO:0008565	protein transporter activity
A8K7D9	IMA1_HUMANImportin subunit alpha-1 OS=Homo sapiens GN=KPNA2 PE=1 SV=1	F	GO:0042826	histone deacetylase binding
A8K7D9	IMA1_HUMANImportin subunit alpha-1 OS=Homo sapiens GN=KPNA2 PE=1 SV=1	N	GO:0044822
A8K7D9	IMA1_HUMANImportin subunit alpha-1 OS=Homo sapiens GN=KPNA2 PE=1 SV=1	P	GO:0000018	regulation of DNA recombination
A8K7D9	IMA1_HUMANImportin subunit alpha-1 OS=Homo sapiens GN=KPNA2 PE=1 SV=1	P	GO:0006607	NLS-bearing substrate import into nucleus
A8K7D9	IMA1_HUMANImportin subunit alpha-1 OS=Homo sapiens GN=KPNA2 PE=1 SV=1	P	GO:0019054	modulation by virus of host process
A8K7D9	IMA1_HUMANImportin subunit alpha-1 OS=Homo sapiens GN=KPNA2 PE=1 SV=1	P	GO:0075733	intracellular transport of viral material
A8K7D9	IMA1_HUMANImportin subunit alpha-1 OS=Homo sapiens GN=KPNA2 PE=1 SV=1	C	GO:0000118	histone deacetylase complex
Q5JR08	RHOC_HUMANRho-related GTP-binding OS=Homo sapiens GN=RHOC PE=1 SV=1	C	GO:0005789	endoplasmic reticulum membrane
Q5JR08	RHOC_HUMANRho-related GTP-binding OS=Homo sapiens GN=RHOC PE=1 SV=1	C	GO:0005794	Golgi apparatus
Q5JR08	RHOC_HUMANRho-related GTP-binding OS=Homo sapiens GN=RHOC PE=1 SV=1	C	GO:0005829	cytosol
Q5JR08	RHOC_HUMANRho-related GTP-binding OS=Homo sapiens GN=RHOC PE=1 SV=1	C	GO:0005925	focal adhesion
Q5JR08	RHOC_HUMANRho-related GTP-binding OS=Homo sapiens GN=RHOC PE=1 SV=1	C	GO:0005938	cell cortex
Q5JR08	RHOC_HUMANRho-related GTP-binding OS=Homo sapiens GN=RHOC PE=1 SV=1	C	GO:0010008	endosome membrane
Q5JR08	RHOC_HUMANRho-related GTP-binding OS=Homo sapiens GN=RHOC PE=1 SV=1	C	GO:0031234	extrinsic to internal side of plasma membrane
Q5JR08	RHOC_HUMANRho-related GTP-binding OS=Homo sapiens GN=RHOC PE=1 SV=1	C	GO:0031252	cell leading edge
Q5JR08	RHOC_HUMANRho-related GTP-binding OS=Homo sapiens GN=RHOC PE=1 SV=1	C	GO:0031410	cytoplasmic vesicle
Q5JR08	RHOC_HUMANRho-related GTP-binding OS=Homo sapiens GN=RHOC PE=1 SV=1	C	GO:0032154	cleavage furrow
Q5JR08	RHOC_HUMANRho-related GTP-binding OS=Homo sapiens GN=RHOC PE=1 SV=1	C	GO:0042995	cell projection
Q5JR08	RHOC_HUMANRho-related GTP-binding OS=Homo sapiens GN=RHOC PE=1 SV=1	C	GO:0043296	apical junction complex
Q5JR08	RHOC_HUMANRho-related GTP-binding OS=Homo sapiens GN=RHOC PE=1 SV=1	C	GO:0070062	extracellular vesicular exosome
Q5JR08	RHOC_HUMANRho-related GTP-binding OS=Homo sapiens GN=RHOC PE=1 SV=1	F	GO:0003924	GTPase activity
Q5JR08	RHOC_HUMANRho-related GTP-binding OS=Homo sapiens GN=RHOC PE=1 SV=1	F	GO:0004871	signal transducer activity
Q5JR08	RHOC_HUMANRho-related GTP-binding OS=Homo sapiens GN=RHOC PE=1 SV=1	F	GO:0005525	GTP binding
Q5JR08	RHOC_HUMANRho-related GTP-binding OS=Homo sapiens GN=RHOC PE=1 SV=1	F	GO:0017022	myosin binding
Q5JR08	RHOC_HUMANRho-related GTP-binding OS=Homo sapiens GN=RHOC PE=1 SV=1	F	GO:0019899	enzyme binding
Q5JR08	RHOC_HUMANRho-related GTP-binding OS=Homo sapiens GN=RHOC PE=1 SV=1	P	GO:0002684	positive regulation of immune system process
Q5JR08	RHOC_HUMANRho-related GTP-binding OS=Homo sapiens GN=RHOC PE=1 SV=1	P	GO:0007179	transforming growth factor beta receptor signaling pathway
Q5JR08	RHOC_HUMANRho-related GTP-binding OS=Homo sapiens GN=RHOC PE=1 SV=1	P	GO:0007266	Rho protein signal transduction
Q5JR08	RHOC_HUMANRho-related GTP-binding OS=Homo sapiens GN=RHOC PE=1 SV=1	P	GO:0008333	endosome to lysosome transport
Q5JR08	RHOC_HUMANRho-related GTP-binding OS=Homo sapiens GN=RHOC PE=1 SV=1	P	GO:0010468	regulation of gene expression
Q5JR08	RHOC_HUMANRho-related GTP-binding OS=Homo sapiens GN=RHOC PE=1 SV=1	P	GO:0010595	positive regulation of endothelial cell migration
Q5JR08	RHOC_HUMANRho-related GTP-binding OS=Homo sapiens GN=RHOC PE=1 SV=1	P	GO:0010810	regulation of cell-substrate adhesion
Q5JR08	RHOC_HUMANRho-related GTP-binding OS=Homo sapiens GN=RHOC PE=1 SV=1	P	GO:0021762	substantia nigra development
Q5JR08	RHOC_HUMANRho-related GTP-binding OS=Homo sapiens GN=RHOC PE=1 SV=1	P	GO:0030168	platelet activation
Q5JR08	RHOC_HUMANRho-related GTP-binding OS=Homo sapiens GN=RHOC PE=1 SV=1	P	GO:0031532	actin cytoskeleton reorganization
Q5JR08	RHOC_HUMANRho-related GTP-binding OS=Homo sapiens GN=RHOC PE=1 SV=1	P	GO:0032467	positive regulation of cytokinesis
Q5JR08	RHOC_HUMANRho-related GTP-binding OS=Homo sapiens GN=RHOC PE=1 SV=1	P	GO:0035385	Roundabout signaling pathway
Q5JR08	RHOC_HUMANRho-related GTP-binding OS=Homo sapiens GN=RHOC PE=1 SV=1	P	GO:0038027	apolipoprotein A-I-mediated signaling pathway
Q5JR08	RHOC_HUMANRho-related GTP-binding OS=Homo sapiens GN=RHOC PE=1 SV=1	P	GO:0042127	regulation of cell proliferation
Q5JR08	RHOC_HUMANRho-related GTP-binding OS=Homo sapiens GN=RHOC PE=1 SV=1	P	GO:0043065	positive regulation of apoptotic process
Q5JR08	RHOC_HUMANRho-related GTP-binding OS=Homo sapiens GN=RHOC PE=1 SV=1	P	GO:0043123	positive regulation of I-kappaB kinase/NF-kappaB cascade
Q5JR08	RHOC_HUMANRho-related GTP-binding OS=Homo sapiens GN=RHOC PE=1 SV=1	P	GO:0043297	apical junction assembly
Q5JR08	RHOC_HUMANRho-related GTP-binding OS=Homo sapiens GN=RHOC PE=1 SV=1	P	GO:0045785	positive regulation of cell adhesion
Q5JR08	RHOC_HUMANRho-related GTP-binding OS=Homo sapiens GN=RHOC PE=1 SV=1	P	GO:0048010	vascular endothelial growth factor receptor signaling pathway
Q5JR08	RHOC_HUMANRho-related GTP-binding OS=Homo sapiens GN=RHOC PE=1 SV=1	P	GO:0048013	ephrin receptor signaling pathway
Q5JR08	RHOC_HUMANRho-related GTP-binding OS=Homo sapiens GN=RHOC PE=1 SV=1	P	GO:0048015	phosphatidylinositol-mediated signaling
Q5JR08	RHOC_HUMANRho-related GTP-binding OS=Homo sapiens GN=RHOC PE=1 SV=1	P	GO:0050771	negative regulation of axonogenesis
Q5JR08	RHOC_HUMANRho-related GTP-binding OS=Homo sapiens GN=RHOC PE=1 SV=1	P	GO:0050772	positive regulation of axonogenesis
Q5JR08	RHOC_HUMANRho-related GTP-binding OS=Homo sapiens GN=RHOC PE=1 SV=1	P	GO:0050919	negative chemotaxis
Q5JR08	RHOC_HUMANRho-related GTP-binding OS=Homo sapiens GN=RHOC PE=1 SV=1	P	GO:0051056	regulation of small GTPase mediated signal transduction
Q5JR08	RHOC_HUMANRho-related GTP-binding OS=Homo sapiens GN=RHOC PE=1 SV=1	P	GO:0051496	positive regulation of stress fiber assembly
Q5JR08	RHOC_HUMANRho-related GTP-binding OS=Homo sapiens GN=RHOC PE=1 SV=1	P	GO:0060071	Wnt receptor signaling pathway, planar cell polarity pathway
Q5JR08	RHOC_HUMANRho-related GTP-binding OS=Homo sapiens GN=RHOC PE=1 SV=1	P	GO:0060193	positive regulation of lipase activity
Q5JR08	RHOC_HUMANRho-related GTP-binding OS=Homo sapiens GN=RHOC PE=1 SV=1	P	GO:0060491	regulation of cell projection assembly
Q5JR08	RHOC_HUMANRho-related GTP-binding OS=Homo sapiens GN=RHOC PE=1 SV=1	P	GO:0070301	cellular response to hydrogen peroxide
Q5JR08	RHOC_HUMANRho-related GTP-binding OS=Homo sapiens GN=RHOC PE=1 SV=1	P	GO:0071479	cellular response to ionizing radiation
Q5JR08	RHOC_HUMANRho-related GTP-binding OS=Homo sapiens GN=RHOC PE=1 SV=1	P	GO:0071902	positive regulation of protein serine/threonine kinase activity
Q5JR08	RHOC_HUMANRho-related GTP-binding OS=Homo sapiens GN=RHOC PE=1 SV=1	P	GO:0090051	negative regulation of cell migration involved in sprouting angiogenesis
Q5JR08	RHOC_HUMANRho-related GTP-binding OS=Homo sapiens GN=RHOC PE=1 SV=1	P	GO:0090307	spindle assembly involved in mitosis
Q5JR08	RHOC_HUMANRho-related GTP-binding OS=Homo sapiens GN=RHOC PE=1 SV=1	P	GO:0090316	positive regulation of intracellular protein transport
Q5JR08	RHOC_HUMANRho-related GTP-binding OS=Homo sapiens GN=RHOC PE=1 SV=1	P	GO:0097498	endothelial tube lumen extension
Q5JR08	RHOC_HUMANRho-related GTP-binding OS=Homo sapiens GN=RHOC PE=1 SV=1	N	GO:0098602
Q5JR08	RHOC_HUMANRho-related GTP-binding OS=Homo sapiens GN=RHOC PE=1 SV=1	N	GO:1903673
Q5JR08	RHOC_HUMANRho-related GTP-binding OS=Homo sapiens GN=RHOC PE=1 SV=1	C	GO:0016459	myosin complex
O75438	NDUB1_HUMANNADH dehydrogenase	C	GO:0005747	mitochondrial respiratory chain complex I
O75438	NDUB1_HUMANNADH dehydrogenase	C	GO:0070062	extracellular vesicular exosome
O75438	NDUB1_HUMANNADH dehydrogenase	F	GO:0008137	NADH dehydrogenase (ubiquinone) activity
O75438	NDUB1_HUMANNADH dehydrogenase	P	GO:0006120	mitochondrial electron transport, NADH to ubiquinone
O75438	NDUB1_HUMANNADH dehydrogenase	P	GO:0032981	mitochondrial respiratory chain complex I assembly
O75438	NDUB1_HUMANNADH dehydrogenase	P	GO:0006744	ubiquinone biosynthetic process
O75438	NDUB1_HUMANNADH dehydrogenase	P	GO:0006814	sodium ion transport
O75438	NDUB1_HUMANNADH dehydrogenase	P	GO:0015992	proton transport
P08581	MET_HUMANHepatocyte growth factor receptor OS=Homo sapiens GN=MET PE=1 SV=4	C	GO:0005887	integral to plasma membrane
P08581	MET_HUMANHepatocyte growth factor receptor OS=Homo sapiens GN=MET PE=1 SV=4	C	GO:0009925	basal plasma membrane
P08581	MET_HUMANHepatocyte growth factor receptor OS=Homo sapiens GN=MET PE=1 SV=4	C	GO:0009986	cell surface
P08581	MET_HUMANHepatocyte growth factor receptor OS=Homo sapiens GN=MET PE=1 SV=4	C	GO:0012505	endomembrane system
P08581	MET_HUMANHepatocyte growth factor receptor OS=Homo sapiens GN=MET PE=1 SV=4	C	GO:0043231	intracellular membrane-bounded organelle
P08581	MET_HUMANHepatocyte growth factor receptor OS=Homo sapiens GN=MET PE=1 SV=4	C	GO:0044444	cytoplasmic part
P08581	MET_HUMANHepatocyte growth factor receptor OS=Homo sapiens GN=MET PE=1 SV=4	F	GO:0005008	hepatocyte growth factor-activated receptor activity
P08581	MET_HUMANHepatocyte growth factor receptor OS=Homo sapiens GN=MET PE=1 SV=4	F	GO:0005524	ATP binding
P08581	MET_HUMANHepatocyte growth factor receptor OS=Homo sapiens GN=MET PE=1 SV=4	F	GO:0019903	protein phosphatase binding
P08581	MET_HUMANHepatocyte growth factor receptor OS=Homo sapiens GN=MET PE=1 SV=4	P	GO:0001886	endothelial cell morphogenesis
P08581	MET_HUMANHepatocyte growth factor receptor OS=Homo sapiens GN=MET PE=1 SV=4	P	GO:0001934	positive regulation of protein phosphorylation
P08581	MET_HUMANHepatocyte growth factor receptor OS=Homo sapiens GN=MET PE=1 SV=4	P	GO:0002376	immune system process
P08581	MET_HUMANHepatocyte growth factor receptor OS=Homo sapiens GN=MET PE=1 SV=4	P	GO:0007169	transmembrane receptor protein tyrosine kinase signaling pathway
P08581	MET_HUMANHepatocyte growth factor receptor OS=Homo sapiens GN=MET PE=1 SV=4	P	GO:0008283	cell proliferation
P08581	MET_HUMANHepatocyte growth factor receptor OS=Homo sapiens GN=MET PE=1 SV=4	P	GO:0009719	response to endogenous stimulus
P08581	MET_HUMANHepatocyte growth factor receptor OS=Homo sapiens GN=MET PE=1 SV=4	P	GO:0030182	neuron differentiation
P08581	MET_HUMANHepatocyte growth factor receptor OS=Homo sapiens GN=MET PE=1 SV=4	P	GO:0043085	positive regulation of catalytic activity
P08581	MET_HUMANHepatocyte growth factor receptor OS=Homo sapiens GN=MET PE=1 SV=4	P	GO:0043408	regulation of MAPK cascade
P08581	MET_HUMANHepatocyte growth factor receptor OS=Homo sapiens GN=MET PE=1 SV=4	P	GO:0043549	regulation of kinase activity
P08581	MET_HUMANHepatocyte growth factor receptor OS=Homo sapiens GN=MET PE=1 SV=4	P	GO:0045944	positive regulation of transcription from RNA polymerase II promoter
P08581	MET_HUMANHepatocyte growth factor receptor OS=Homo sapiens GN=MET PE=1 SV=4	P	GO:0048513	organ development
P08581	MET_HUMANHepatocyte growth factor receptor OS=Homo sapiens GN=MET PE=1 SV=4	P	GO:0048754	branching morphogenesis of an epithelial tube
P08581	MET_HUMANHepatocyte growth factor receptor OS=Homo sapiens GN=MET PE=1 SV=4	P	GO:0050793	regulation of developmental process
P08581	MET_HUMANHepatocyte growth factor receptor OS=Homo sapiens GN=MET PE=1 SV=4	P	GO:0050918	positive chemotaxis
P08581	MET_HUMANHepatocyte growth factor receptor OS=Homo sapiens GN=MET PE=1 SV=4	P	GO:0051704	multi-organism process
P08581	MET_HUMANHepatocyte growth factor receptor OS=Homo sapiens GN=MET PE=1 SV=4	P	GO:0065008	regulation of biological quality
P08581	MET_HUMANHepatocyte growth factor receptor OS=Homo sapiens GN=MET PE=1 SV=4	P	GO:0071310	cellular response to organic substance
P08581	MET_HUMANHepatocyte growth factor receptor OS=Homo sapiens GN=MET PE=1 SV=4	P	GO:0071526	semaphorin-plexin signaling pathway
P08581	MET_HUMANHepatocyte growth factor receptor OS=Homo sapiens GN=MET PE=1 SV=4	P	GO:1901299	negative regulation of hydrogen peroxide-mediated programmed cell death
P08581	MET_HUMANHepatocyte growth factor receptor OS=Homo sapiens GN=MET PE=1 SV=4	N	GO:1902533
P08581	MET_HUMANHepatocyte growth factor receptor OS=Homo sapiens GN=MET PE=1 SV=4	P	GO:2001028	positive regulation of endothelial cell chemotaxis
Q9Y3C1	NOP16_HUMANNucleolar 16 OS=Homo sapiens GN=NOP16 PE=1 SV=2	C	GO:0005730	nucleolus
Q9Y3C1	NOP16_HUMANNucleolar 16 OS=Homo sapiens GN=NOP16 PE=1 SV=2	N	GO:0044822
P84101	SERF2_HUMANSmall EDRK-rich factor 2 OS=Homo sapiens GN=SERF2 PE=1 SV=1	C	GO:0044424	intracellular part
P07311	ACYP1_HUMANAcylphosphatase-1 OS=Homo sapiens GN=ACYP1 PE=1 SV=2	C	GO:0070062	extracellular vesicular exosome
P07311	ACYP1_HUMANAcylphosphatase-1 OS=Homo sapiens GN=ACYP1 PE=1 SV=2	F	GO:0003998	acylphosphatase activity
P07311	ACYP1_HUMANAcylphosphatase-1 OS=Homo sapiens GN=ACYP1 PE=1 SV=2	P	GO:0006094	gluconeogenesis
P07311	ACYP1_HUMANAcylphosphatase-1 OS=Homo sapiens GN=ACYP1 PE=1 SV=2	P	GO:0006096	glycolysis
P07311	ACYP1_HUMANAcylphosphatase-1 OS=Homo sapiens GN=ACYP1 PE=1 SV=2	P	GO:0018874	benzoate metabolic process
Q13895	BYST_HUMANBystin OS=Homo sapiens GN=BYSL PE=1 SV=3	C	GO:0005654	nucleoplasm
Q13895	BYST_HUMANBystin OS=Homo sapiens GN=BYSL PE=1 SV=3	C	GO:0005730	nucleolus
Q13895	BYST_HUMANBystin OS=Homo sapiens GN=BYSL PE=1 SV=3	C	GO:0005829	cytosol
Q13895	BYST_HUMANBystin OS=Homo sapiens GN=BYSL PE=1 SV=3	C	GO:0016020	membrane
Q13895	BYST_HUMANBystin OS=Homo sapiens GN=BYSL PE=1 SV=3	F	GO:0005515	protein binding
Q13895	BYST_HUMANBystin OS=Homo sapiens GN=BYSL PE=1 SV=3	N	GO:0044822
Q13895	BYST_HUMANBystin OS=Homo sapiens GN=BYSL PE=1 SV=3	P	GO:0006364	rRNA processing
Q13895	BYST_HUMANBystin OS=Homo sapiens GN=BYSL PE=1 SV=3	P	GO:0007155	cell adhesion
Q13895	BYST_HUMANBystin OS=Homo sapiens GN=BYSL PE=1 SV=3	P	GO:0007275	multicellular organismal development
Q13895	BYST_HUMANBystin OS=Homo sapiens GN=BYSL PE=1 SV=3	P	GO:0007565	female pregnancy
Q13895	BYST_HUMANBystin OS=Homo sapiens GN=BYSL PE=1 SV=3	P	GO:0071310	cellular response to organic substance
B2R4U3	UBE2C_HUMANUbiquitin-conjugating enzyme E2 C OS=Homo sapiens GN=UBE2C PE=1 SV=1	C	GO:0005654	nucleoplasm
B2R4U3	UBE2C_HUMANUbiquitin-conjugating enzyme E2 C OS=Homo sapiens GN=UBE2C PE=1 SV=1	C	GO:0005680	anaphase-promoting complex
B2R4U3	UBE2C_HUMANUbiquitin-conjugating enzyme E2 C OS=Homo sapiens GN=UBE2C PE=1 SV=1	C	GO:0005829	cytosol
B2R4U3	UBE2C_HUMANUbiquitin-conjugating enzyme E2 C OS=Homo sapiens GN=UBE2C PE=1 SV=1	C	GO:0043232	intracellular non-membrane-bounded organelle
B2R4U3	UBE2C_HUMANUbiquitin-conjugating enzyme E2 C OS=Homo sapiens GN=UBE2C PE=1 SV=1	F	GO:0005515	protein binding
B2R4U3	UBE2C_HUMANUbiquitin-conjugating enzyme E2 C OS=Homo sapiens GN=UBE2C PE=1 SV=1	N	GO:0061631
B2R4U3	UBE2C_HUMANUbiquitin-conjugating enzyme E2 C OS=Homo sapiens GN=UBE2C PE=1 SV=1	P	GO:0000090	mitotic anaphase
B2R4U3	UBE2C_HUMANUbiquitin-conjugating enzyme E2 C OS=Homo sapiens GN=UBE2C PE=1 SV=1	P	GO:0006281	DNA repair
B2R4U3	UBE2C_HUMANUbiquitin-conjugating enzyme E2 C OS=Homo sapiens GN=UBE2C PE=1 SV=1	P	GO:0007165	signal transduction
B2R4U3	UBE2C_HUMANUbiquitin-conjugating enzyme E2 C OS=Homo sapiens GN=UBE2C PE=1 SV=1	P	GO:0010994	free ubiquitin chain polymerization
B2R4U3	UBE2C_HUMANUbiquitin-conjugating enzyme E2 C OS=Homo sapiens GN=UBE2C PE=1 SV=1	P	GO:0019219	regulation of nucleobase-containing compound metabolic process
B2R4U3	UBE2C_HUMANUbiquitin-conjugating enzyme E2 C OS=Homo sapiens GN=UBE2C PE=1 SV=1	P	GO:0031145	anaphase-promoting complex-dependent proteasomal ubiquitin-dependent protein catabolic process
B2R4U3	UBE2C_HUMANUbiquitin-conjugating enzyme E2 C OS=Homo sapiens GN=UBE2C PE=1 SV=1	P	GO:0031536	positive regulation of exit from mitosis
B2R4U3	UBE2C_HUMANUbiquitin-conjugating enzyme E2 C OS=Homo sapiens GN=UBE2C PE=1 SV=1	P	GO:0048583	regulation of response to stimulus
B2R4U3	UBE2C_HUMANUbiquitin-conjugating enzyme E2 C OS=Homo sapiens GN=UBE2C PE=1 SV=1	P	GO:0051436	negative regulation of ubiquitin-protein ligase activity involved in mitotic cell cycle
B2R4U3	UBE2C_HUMANUbiquitin-conjugating enzyme E2 C OS=Homo sapiens GN=UBE2C PE=1 SV=1	P	GO:0051437	positive regulation of ubiquitin-protein ligase activity involved in mitotic cell cycle
B2R4U3	UBE2C_HUMANUbiquitin-conjugating enzyme E2 C OS=Homo sapiens GN=UBE2C PE=1 SV=1	P	GO:0070936	protein K48-linked ubiquitination
B2R4U3	UBE2C_HUMANUbiquitin-conjugating enzyme E2 C OS=Homo sapiens GN=UBE2C PE=1 SV=1	P	GO:0070979	protein K11-linked ubiquitination
P62081	RS7_HUMAN40S ribosomal S7 OS=Homo sapiens GN=RPS7 PE=1 SV=1	C	GO:0005654	nucleoplasm
P62081	RS7_HUMAN40S ribosomal S7 OS=Homo sapiens GN=RPS7 PE=1 SV=1	C	GO:0005730	nucleolus
P62081	RS7_HUMAN40S ribosomal S7 OS=Homo sapiens GN=RPS7 PE=1 SV=1	C	GO:0005925	focal adhesion
P62081	RS7_HUMAN40S ribosomal S7 OS=Homo sapiens GN=RPS7 PE=1 SV=1	C	GO:0016020	membrane
P62081	RS7_HUMAN40S ribosomal S7 OS=Homo sapiens GN=RPS7 PE=1 SV=1	C	GO:0022627	cytosolic small ribosomal subunit
P62081	RS7_HUMAN40S ribosomal S7 OS=Homo sapiens GN=RPS7 PE=1 SV=1	C	GO:0030684	preribosome
P62081	RS7_HUMAN40S ribosomal S7 OS=Homo sapiens GN=RPS7 PE=1 SV=1	C	GO:0070062	extracellular vesicular exosome
P62081	RS7_HUMAN40S ribosomal S7 OS=Homo sapiens GN=RPS7 PE=1 SV=1	F	GO:0003735	structural constituent of ribosome
P62081	RS7_HUMAN40S ribosomal S7 OS=Homo sapiens GN=RPS7 PE=1 SV=1	F	GO:0005515	protein binding
P62081	RS7_HUMAN40S ribosomal S7 OS=Homo sapiens GN=RPS7 PE=1 SV=1	N	GO:0044822
P62081	RS7_HUMAN40S ribosomal S7 OS=Homo sapiens GN=RPS7 PE=1 SV=1	P	GO:0000184	nuclear-transcribed mRNA catabolic process, nonsense-mediated decay
P62081	RS7_HUMAN40S ribosomal S7 OS=Homo sapiens GN=RPS7 PE=1 SV=1	P	GO:0006364	rRNA processing
P62081	RS7_HUMAN40S ribosomal S7 OS=Homo sapiens GN=RPS7 PE=1 SV=1	P	GO:0006413	translational initiation
P62081	RS7_HUMAN40S ribosomal S7 OS=Homo sapiens GN=RPS7 PE=1 SV=1	P	GO:0006614	SRP-dependent cotranslational protein targeting to membrane
P62081	RS7_HUMAN40S ribosomal S7 OS=Homo sapiens GN=RPS7 PE=1 SV=1	P	GO:0019083	viral transcription
P62081	RS7_HUMAN40S ribosomal S7 OS=Homo sapiens GN=RPS7 PE=1 SV=1	P	GO:0042274	ribosomal small subunit biogenesis
Q6IAM0	EIF3G_HUMANEukaryotic translation initiation factor 3 subunit G OS=Homo sapiens GN=EIF3G PE=1 SV=2	C	GO:0005829	cytosol
Q6IAM0	EIF3G_HUMANEukaryotic translation initiation factor 3 subunit G OS=Homo sapiens GN=EIF3G PE=1 SV=2	C	GO:0005852	eukaryotic translation initiation factor 3 complex
Q6IAM0	EIF3G_HUMANEukaryotic translation initiation factor 3 subunit G OS=Homo sapiens GN=EIF3G PE=1 SV=2	C	GO:0044428	nuclear part
Q6IAM0	EIF3G_HUMANEukaryotic translation initiation factor 3 subunit G OS=Homo sapiens GN=EIF3G PE=1 SV=2	F	GO:0000166	nucleotide binding
Q6IAM0	EIF3G_HUMANEukaryotic translation initiation factor 3 subunit G OS=Homo sapiens GN=EIF3G PE=1 SV=2	F	GO:0003743	translation initiation factor activity
Q6IAM0	EIF3G_HUMANEukaryotic translation initiation factor 3 subunit G OS=Homo sapiens GN=EIF3G PE=1 SV=2	F	GO:0005515	protein binding
Q6IAM0	EIF3G_HUMANEukaryotic translation initiation factor 3 subunit G OS=Homo sapiens GN=EIF3G PE=1 SV=2	N	GO:0044822
Q6IAM0	EIF3G_HUMANEukaryotic translation initiation factor 3 subunit G OS=Homo sapiens GN=EIF3G PE=1 SV=2	P	GO:0010608	posttranscriptional regulation of gene expression
Q6IAM0	EIF3G_HUMANEukaryotic translation initiation factor 3 subunit G OS=Homo sapiens GN=EIF3G PE=1 SV=2	P	GO:0044699	single-organism process
Q6IAM0	EIF3G_HUMANEukaryotic translation initiation factor 3 subunit G OS=Homo sapiens GN=EIF3G PE=1 SV=2	P	GO:0075525	viral translational termination-reinitiation
Q6IAM0	EIF3G_HUMANEukaryotic translation initiation factor 3 subunit G OS=Homo sapiens GN=EIF3G PE=1 SV=2	P	GO:2000112	regulation of cellular macromolecule biosynthetic process
Q6IAM0	EIF3G_HUMANEukaryotic translation initiation factor 3 subunit G OS=Homo sapiens GN=EIF3G PE=1 SV=2	C	GO:0005840	ribosome
Q6IAM0	EIF3G_HUMANEukaryotic translation initiation factor 3 subunit G OS=Homo sapiens GN=EIF3G PE=1 SV=2	P	GO:0006446	regulation of translational initiation
Q9BVP2	GNL3_HUMANGuanine nucleotide-binding -like 3 OS=Homo sapiens GN=GNL3 PE=1 SV=2	C	GO:0005615	extracellular space
Q9BVP2	GNL3_HUMANGuanine nucleotide-binding -like 3 OS=Homo sapiens GN=GNL3 PE=1 SV=2	C	GO:0005730	nucleolus
Q9BVP2	GNL3_HUMANGuanine nucleotide-binding -like 3 OS=Homo sapiens GN=GNL3 PE=1 SV=2	C	GO:0016020	membrane
Q9BVP2	GNL3_HUMANGuanine nucleotide-binding -like 3 OS=Homo sapiens GN=GNL3 PE=1 SV=2	C	GO:0044444	cytoplasmic part
Q9BVP2	GNL3_HUMANGuanine nucleotide-binding -like 3 OS=Homo sapiens GN=GNL3 PE=1 SV=2	F	GO:0005515	protein binding
Q9BVP2	GNL3_HUMANGuanine nucleotide-binding -like 3 OS=Homo sapiens GN=GNL3 PE=1 SV=2	F	GO:0005525	GTP binding
Q9BVP2	GNL3_HUMANGuanine nucleotide-binding -like 3 OS=Homo sapiens GN=GNL3 PE=1 SV=2	F	GO:0016787	hydrolase activity
Q9BVP2	GNL3_HUMANGuanine nucleotide-binding -like 3 OS=Homo sapiens GN=GNL3 PE=1 SV=2	N	GO:0044822
Q9BVP2	GNL3_HUMANGuanine nucleotide-binding -like 3 OS=Homo sapiens GN=GNL3 PE=1 SV=2	P	GO:0032206	positive regulation of telomere maintenance
Q9BVP2	GNL3_HUMANGuanine nucleotide-binding -like 3 OS=Homo sapiens GN=GNL3 PE=1 SV=2	P	GO:0033235	positive regulation of protein sumoylation
Q9BVP2	GNL3_HUMANGuanine nucleotide-binding -like 3 OS=Homo sapiens GN=GNL3 PE=1 SV=2	N	GO:1902895
Q9BVP2	GNL3_HUMANGuanine nucleotide-binding -like 3 OS=Homo sapiens GN=GNL3 PE=1 SV=2	N	GO:1904816
Q6DKI1	RL7L_HUMAN60S ribosomal L7-like 1 OS=Homo sapiens GN=RPL7L1 PE=1 SV=1	C	GO:0005829	cytosol
Q6DKI1	RL7L_HUMAN60S ribosomal L7-like 1 OS=Homo sapiens GN=RPL7L1 PE=1 SV=1	C	GO:0005840	ribosome
Q6DKI1	RL7L_HUMAN60S ribosomal L7-like 1 OS=Homo sapiens GN=RPL7L1 PE=1 SV=1	C	GO:0044446	intracellular organelle part
Q6DKI1	RL7L_HUMAN60S ribosomal L7-like 1 OS=Homo sapiens GN=RPL7L1 PE=1 SV=1	N	GO:0044822
Q6DKI1	RL7L_HUMAN60S ribosomal L7-like 1 OS=Homo sapiens GN=RPL7L1 PE=1 SV=1	P	GO:0006364	rRNA processing
Q6DKI1	RL7L_HUMAN60S ribosomal L7-like 1 OS=Homo sapiens GN=RPL7L1 PE=1 SV=1	P	GO:0006412	translation
Q6DKI1	RL7L_HUMAN60S ribosomal L7-like 1 OS=Homo sapiens GN=RPL7L1 PE=1 SV=1	P	GO:0042273	ribosomal large subunit biogenesis
Q8N4P8	NOG1_HUMANNucleolar GTP-binding 1 OS=Homo sapiens GN=GTPBP4 PE=1 SV=3	C	GO:0005730	nucleolus
Q8N4P8	NOG1_HUMANNucleolar GTP-binding 1 OS=Homo sapiens GN=GTPBP4 PE=1 SV=3	C	GO:0005794	Golgi apparatus
Q8N4P8	NOG1_HUMANNucleolar GTP-binding 1 OS=Homo sapiens GN=GTPBP4 PE=1 SV=3	C	GO:0031965	nuclear membrane
Q8N4P8	NOG1_HUMANNucleolar GTP-binding 1 OS=Homo sapiens GN=GTPBP4 PE=1 SV=3	C	GO:0048471	perinuclear region of cytoplasm
Q8N4P8	NOG1_HUMANNucleolar GTP-binding 1 OS=Homo sapiens GN=GTPBP4 PE=1 SV=3	F	GO:0003924	GTPase activity
Q8N4P8	NOG1_HUMANNucleolar GTP-binding 1 OS=Homo sapiens GN=GTPBP4 PE=1 SV=3	F	GO:0005515	protein binding
Q8N4P8	NOG1_HUMANNucleolar GTP-binding 1 OS=Homo sapiens GN=GTPBP4 PE=1 SV=3	F	GO:0005525	GTP binding
Q8N4P8	NOG1_HUMANNucleolar GTP-binding 1 OS=Homo sapiens GN=GTPBP4 PE=1 SV=3	N	GO:0044822
Q8N4P8	NOG1_HUMANNucleolar GTP-binding 1 OS=Homo sapiens GN=GTPBP4 PE=1 SV=3	P	GO:0000079	regulation of cyclin-dependent protein serine/threonine kinase activity
Q8N4P8	NOG1_HUMANNucleolar GTP-binding 1 OS=Homo sapiens GN=GTPBP4 PE=1 SV=3	P	GO:0001649	osteoblast differentiation
Q8N4P8	NOG1_HUMANNucleolar GTP-binding 1 OS=Homo sapiens GN=GTPBP4 PE=1 SV=3	P	GO:0008156	negative regulation of DNA replication
Q8N4P8	NOG1_HUMANNucleolar GTP-binding 1 OS=Homo sapiens GN=GTPBP4 PE=1 SV=3	P	GO:0008285	negative regulation of cell proliferation
Q8N4P8	NOG1_HUMANNucleolar GTP-binding 1 OS=Homo sapiens GN=GTPBP4 PE=1 SV=3	P	GO:0022408	negative regulation of cell-cell adhesion
Q8N4P8	NOG1_HUMANNucleolar GTP-binding 1 OS=Homo sapiens GN=GTPBP4 PE=1 SV=3	P	GO:0030336	negative regulation of cell migration
Q8N4P8	NOG1_HUMANNucleolar GTP-binding 1 OS=Homo sapiens GN=GTPBP4 PE=1 SV=3	P	GO:0031397	negative regulation of protein ubiquitination
Q8N4P8	NOG1_HUMANNucleolar GTP-binding 1 OS=Homo sapiens GN=GTPBP4 PE=1 SV=3	P	GO:0033342	negative regulation of collagen binding
Q8N4P8	NOG1_HUMANNucleolar GTP-binding 1 OS=Homo sapiens GN=GTPBP4 PE=1 SV=3	P	GO:0050821	protein stabilization
Q9BVJ6	UT14A_HUMANU3 small nucleolar RNA-associated 14 homolog A OS=Homo sapiens GN=UTP14A PE=1 SV=1	C	GO:0005654	nucleoplasm
Q9BVJ6	UT14A_HUMANU3 small nucleolar RNA-associated 14 homolog A OS=Homo sapiens GN=UTP14A PE=1 SV=1	C	GO:0032040	small-subunit processome
Q9BVJ6	UT14A_HUMANU3 small nucleolar RNA-associated 14 homolog A OS=Homo sapiens GN=UTP14A PE=1 SV=1	F	GO:0005515	protein binding
Q9BVJ6	UT14A_HUMANU3 small nucleolar RNA-associated 14 homolog A OS=Homo sapiens GN=UTP14A PE=1 SV=1	N	GO:0044822
Q9BVJ6	UT14A_HUMANU3 small nucleolar RNA-associated 14 homolog A OS=Homo sapiens GN=UTP14A PE=1 SV=1	P	GO:0006364	rRNA processing
P83881	RL36A_HUMAN60S ribosomal L36a OS=Homo sapiens GN=RPL36A PE=1 SV=2	C	GO:0022625	cytosolic large ribosomal subunit
P83881	RL36A_HUMAN60S ribosomal L36a OS=Homo sapiens GN=RPL36A PE=1 SV=2	F	GO:0003735	structural constituent of ribosome
P83881	RL36A_HUMAN60S ribosomal L36a OS=Homo sapiens GN=RPL36A PE=1 SV=2	F	GO:0005515	protein binding
P83881	RL36A_HUMAN60S ribosomal L36a OS=Homo sapiens GN=RPL36A PE=1 SV=2	N	GO:0044822
P83881	RL36A_HUMAN60S ribosomal L36a OS=Homo sapiens GN=RPL36A PE=1 SV=2	P	GO:0000184	nuclear-transcribed mRNA catabolic process, nonsense-mediated decay
P83881	RL36A_HUMAN60S ribosomal L36a OS=Homo sapiens GN=RPL36A PE=1 SV=2	P	GO:0002181	cytoplasmic translation
P83881	RL36A_HUMAN60S ribosomal L36a OS=Homo sapiens GN=RPL36A PE=1 SV=2	P	GO:0006364	rRNA processing
P83881	RL36A_HUMAN60S ribosomal L36a OS=Homo sapiens GN=RPL36A PE=1 SV=2	P	GO:0006413	translational initiation
P83881	RL36A_HUMAN60S ribosomal L36a OS=Homo sapiens GN=RPL36A PE=1 SV=2	P	GO:0006614	SRP-dependent cotranslational protein targeting to membrane
P83881	RL36A_HUMAN60S ribosomal L36a OS=Homo sapiens GN=RPL36A PE=1 SV=2	P	GO:0019083	viral transcription
B2R841	PLK1_HUMANSerine threonine- kinase PLK1 OS=Homo sapiens GN=PLK1 PE=1 SV=1	C	GO:0000922	spindle pole
B2R841	PLK1_HUMANSerine threonine- kinase PLK1 OS=Homo sapiens GN=PLK1 PE=1 SV=1	C	GO:0000942	condensed nuclear chromosome outer kinetochore
B2R841	PLK1_HUMANSerine threonine- kinase PLK1 OS=Homo sapiens GN=PLK1 PE=1 SV=1	C	GO:0005654	nucleoplasm
B2R841	PLK1_HUMANSerine threonine- kinase PLK1 OS=Homo sapiens GN=PLK1 PE=1 SV=1	C	GO:0005730	nucleolus
B2R841	PLK1_HUMANSerine threonine- kinase PLK1 OS=Homo sapiens GN=PLK1 PE=1 SV=1	C	GO:0005813	centrosome
B2R841	PLK1_HUMANSerine threonine- kinase PLK1 OS=Homo sapiens GN=PLK1 PE=1 SV=1	C	GO:0005829	cytosol
B2R841	PLK1_HUMANSerine threonine- kinase PLK1 OS=Homo sapiens GN=PLK1 PE=1 SV=1	C	GO:0005876	spindle microtubule
B2R841	PLK1_HUMANSerine threonine- kinase PLK1 OS=Homo sapiens GN=PLK1 PE=1 SV=1	C	GO:0030496	midbody
B2R841	PLK1_HUMANSerine threonine- kinase PLK1 OS=Homo sapiens GN=PLK1 PE=1 SV=1	C	GO:0051233	spindle midzone
B2R841	PLK1_HUMANSerine threonine- kinase PLK1 OS=Homo sapiens GN=PLK1 PE=1 SV=1	F	GO:0004674	protein serine/threonine kinase activity
B2R841	PLK1_HUMANSerine threonine- kinase PLK1 OS=Homo sapiens GN=PLK1 PE=1 SV=1	F	GO:0005524	ATP binding
B2R841	PLK1_HUMANSerine threonine- kinase PLK1 OS=Homo sapiens GN=PLK1 PE=1 SV=1	F	GO:0008017	microtubule binding
B2R841	PLK1_HUMANSerine threonine- kinase PLK1 OS=Homo sapiens GN=PLK1 PE=1 SV=1	F	GO:0010997	anaphase-promoting complex binding
B2R841	PLK1_HUMANSerine threonine- kinase PLK1 OS=Homo sapiens GN=PLK1 PE=1 SV=1	F	GO:0019901	protein kinase binding
B2R841	PLK1_HUMANSerine threonine- kinase PLK1 OS=Homo sapiens GN=PLK1 PE=1 SV=1	P	GO:0000086	G2/M transition of mitotic cell cycle
B2R841	PLK1_HUMANSerine threonine- kinase PLK1 OS=Homo sapiens GN=PLK1 PE=1 SV=1	P	GO:0000088	mitotic prophase
B2R841	PLK1_HUMANSerine threonine- kinase PLK1 OS=Homo sapiens GN=PLK1 PE=1 SV=1	P	GO:0000090	mitotic anaphase
B2R841	PLK1_HUMANSerine threonine- kinase PLK1 OS=Homo sapiens GN=PLK1 PE=1 SV=1	P	GO:0000122	negative regulation of transcription from RNA polymerase II promoter
B2R841	PLK1_HUMANSerine threonine- kinase PLK1 OS=Homo sapiens GN=PLK1 PE=1 SV=1	P	GO:0000236	mitotic prometaphase
B2R841	PLK1_HUMANSerine threonine- kinase PLK1 OS=Homo sapiens GN=PLK1 PE=1 SV=1	P	GO:0000281	mitotic cytokinesis
B2R841	PLK1_HUMANSerine threonine- kinase PLK1 OS=Homo sapiens GN=PLK1 PE=1 SV=1	P	GO:0001578	microtubule bundle formation
B2R841	PLK1_HUMANSerine threonine- kinase PLK1 OS=Homo sapiens GN=PLK1 PE=1 SV=1	P	GO:0007062	sister chromatid cohesion
B2R841	PLK1_HUMANSerine threonine- kinase PLK1 OS=Homo sapiens GN=PLK1 PE=1 SV=1	P	GO:0007077	mitotic nuclear envelope disassembly
B2R841	PLK1_HUMANSerine threonine- kinase PLK1 OS=Homo sapiens GN=PLK1 PE=1 SV=1	P	GO:0007094	mitotic spindle assembly checkpoint
B2R841	PLK1_HUMANSerine threonine- kinase PLK1 OS=Homo sapiens GN=PLK1 PE=1 SV=1	P	GO:0008283	cell proliferation
B2R841	PLK1_HUMANSerine threonine- kinase PLK1 OS=Homo sapiens GN=PLK1 PE=1 SV=1	P	GO:0010646	regulation of cell communication
B2R841	PLK1_HUMANSerine threonine- kinase PLK1 OS=Homo sapiens GN=PLK1 PE=1 SV=1	P	GO:0010800	positive regulation of peptidyl-threonine phosphorylation
B2R841	PLK1_HUMANSerine threonine- kinase PLK1 OS=Homo sapiens GN=PLK1 PE=1 SV=1	P	GO:0018105	peptidyl-serine phosphorylation
B2R841	PLK1_HUMANSerine threonine- kinase PLK1 OS=Homo sapiens GN=PLK1 PE=1 SV=1	P	GO:0023051	regulation of signaling
B2R841	PLK1_HUMANSerine threonine- kinase PLK1 OS=Homo sapiens GN=PLK1 PE=1 SV=1	P	GO:0031145	anaphase-promoting complex-dependent proteasomal ubiquitin-dependent protein catabolic process
B2R841	PLK1_HUMANSerine threonine- kinase PLK1 OS=Homo sapiens GN=PLK1 PE=1 SV=1	P	GO:0031572	G2 DNA damage checkpoint
B2R841	PLK1_HUMANSerine threonine- kinase PLK1 OS=Homo sapiens GN=PLK1 PE=1 SV=1	P	GO:0031648	protein destabilization
B2R841	PLK1_HUMANSerine threonine- kinase PLK1 OS=Homo sapiens GN=PLK1 PE=1 SV=1	P	GO:0032436	positive regulation of proteasomal ubiquitin-dependent protein catabolic process
B2R841	PLK1_HUMANSerine threonine- kinase PLK1 OS=Homo sapiens GN=PLK1 PE=1 SV=1	P	GO:0035556	intracellular signal transduction
B2R841	PLK1_HUMANSerine threonine- kinase PLK1 OS=Homo sapiens GN=PLK1 PE=1 SV=1	P	GO:0043066	negative regulation of apoptotic process
B2R841	PLK1_HUMANSerine threonine- kinase PLK1 OS=Homo sapiens GN=PLK1 PE=1 SV=1	P	GO:0043393	regulation of protein binding
B2R841	PLK1_HUMANSerine threonine- kinase PLK1 OS=Homo sapiens GN=PLK1 PE=1 SV=1	P	GO:0045184	establishment of protein localization
B2R841	PLK1_HUMANSerine threonine- kinase PLK1 OS=Homo sapiens GN=PLK1 PE=1 SV=1	P	GO:0045736	negative regulation of cyclin-dependent protein serine/threonine kinase activity
B2R841	PLK1_HUMANSerine threonine- kinase PLK1 OS=Homo sapiens GN=PLK1 PE=1 SV=1	P	GO:0051297	centrosome organization
B2R841	PLK1_HUMANSerine threonine- kinase PLK1 OS=Homo sapiens GN=PLK1 PE=1 SV=1	P	GO:0051437	positive regulation of ubiquitin-protein ligase activity involved in mitotic cell cycle
B2R841	PLK1_HUMANSerine threonine- kinase PLK1 OS=Homo sapiens GN=PLK1 PE=1 SV=1	P	GO:0051439	regulation of ubiquitin-protein ligase activity involved in mitotic cell cycle
B2R841	PLK1_HUMANSerine threonine- kinase PLK1 OS=Homo sapiens GN=PLK1 PE=1 SV=1	P	GO:0071168	protein localization to chromatin
B2R841	PLK1_HUMANSerine threonine- kinase PLK1 OS=Homo sapiens GN=PLK1 PE=1 SV=1	P	GO:1900182	positive regulation of protein localization to nucleus
B2R841	PLK1_HUMANSerine threonine- kinase PLK1 OS=Homo sapiens GN=PLK1 PE=1 SV=1	P	GO:1901673	regulation of spindle assembly involved in mitosis
B2R841	PLK1_HUMANSerine threonine- kinase PLK1 OS=Homo sapiens GN=PLK1 PE=1 SV=1	N	GO:1902749
B2R841	PLK1_HUMANSerine threonine- kinase PLK1 OS=Homo sapiens GN=PLK1 PE=1 SV=1	N	GO:1903046
B2R841	PLK1_HUMANSerine threonine- kinase PLK1 OS=Homo sapiens GN=PLK1 PE=1 SV=1	P	GO:0009069	serine family amino acid metabolic process
B2R841	PLK1_HUMANSerine threonine- kinase PLK1 OS=Homo sapiens GN=PLK1 PE=1 SV=1	C	GO:0045298	tubulin complex
B2R4N3	UBL5_HUMANUbiquitin 5 OS=Homo sapiens GN=UBL5 PE=1 SV=1	C	GO:0005737	cytoplasm
B2R4N3	UBL5_HUMANUbiquitin 5 OS=Homo sapiens GN=UBL5 PE=1 SV=1	F	GO:0005515	protein binding
B2R4N3	UBL5_HUMANUbiquitin 5 OS=Homo sapiens GN=UBL5 PE=1 SV=1	P	GO:0044238	primary metabolic process
B2R4N3	UBL5_HUMANUbiquitin 5 OS=Homo sapiens GN=UBL5 PE=1 SV=1	P	GO:0044260	cellular macromolecule metabolic process
B2R4N3	UBL5_HUMANUbiquitin 5 OS=Homo sapiens GN=UBL5 PE=1 SV=1	N	GO:1903955
Q9UJC5	SH3L2_HUMANSH3 domain-binding glutamic acid-rich 2 OS=Homo sapiens GN=SH3BGRL2 PE=1 SV=2	C	GO:0005654	nucleoplasm
Q9UJC5	SH3L2_HUMANSH3 domain-binding glutamic acid-rich 2 OS=Homo sapiens GN=SH3BGRL2 PE=1 SV=2	C	GO:0005737	cytoplasm
Q9UJC5	SH3L2_HUMANSH3 domain-binding glutamic acid-rich 2 OS=Homo sapiens GN=SH3BGRL2 PE=1 SV=2	C	GO:0070062	extracellular vesicular exosome
Q9NSI2	F207A_HUMAN FAM207A OS=Homo sapiens GN=FAM207A PE=1 SV=2	F	GO:0005515	protein binding
B2R823	PNO1_HUMANRNA-binding PNO1 OS=Homo sapiens GN=PNO1 PE=1 SV=1	C	GO:0005654	nucleoplasm
B2R823	PNO1_HUMANRNA-binding PNO1 OS=Homo sapiens GN=PNO1 PE=1 SV=1	C	GO:0005730	nucleolus
B2R823	PNO1_HUMANRNA-binding PNO1 OS=Homo sapiens GN=PNO1 PE=1 SV=1	C	GO:0005829	cytosol
B2R823	PNO1_HUMANRNA-binding PNO1 OS=Homo sapiens GN=PNO1 PE=1 SV=1	N	GO:0044822
B2R823	PNO1_HUMANRNA-binding PNO1 OS=Homo sapiens GN=PNO1 PE=1 SV=1	P	GO:0006364	rRNA processing
B6CGU5	CASP8_HUMANCaspase-8 OS=Homo sapiens GN=CASP8 PE=1 SV=1	C	GO:0016020	membrane
B6CGU5	CASP8_HUMANCaspase-8 OS=Homo sapiens GN=CASP8 PE=1 SV=1	C	GO:0043227	membrane-bounded organelle
B6CGU5	CASP8_HUMANCaspase-8 OS=Homo sapiens GN=CASP8 PE=1 SV=1	C	GO:0043229	intracellular organelle
B6CGU5	CASP8_HUMANCaspase-8 OS=Homo sapiens GN=CASP8 PE=1 SV=1	C	GO:0043234	protein complex
B6CGU5	CASP8_HUMANCaspase-8 OS=Homo sapiens GN=CASP8 PE=1 SV=1	C	GO:0044445	cytosolic part
B6CGU5	CASP8_HUMANCaspase-8 OS=Homo sapiens GN=CASP8 PE=1 SV=1	F	GO:0004197	cysteine-type endopeptidase activity
B6CGU5	CASP8_HUMANCaspase-8 OS=Homo sapiens GN=CASP8 PE=1 SV=1	F	GO:0005515	protein binding
B6CGU5	CASP8_HUMANCaspase-8 OS=Homo sapiens GN=CASP8 PE=1 SV=1	P	GO:0002682	regulation of immune system process
B6CGU5	CASP8_HUMANCaspase-8 OS=Homo sapiens GN=CASP8 PE=1 SV=1	P	GO:0006950	response to stress
B6CGU5	CASP8_HUMANCaspase-8 OS=Homo sapiens GN=CASP8 PE=1 SV=1	P	GO:0009628	response to abiotic stimulus
B6CGU5	CASP8_HUMANCaspase-8 OS=Homo sapiens GN=CASP8 PE=1 SV=1	P	GO:0010033	response to organic substance
B6CGU5	CASP8_HUMANCaspase-8 OS=Homo sapiens GN=CASP8 PE=1 SV=1	P	GO:0016043	cellular component organization
B6CGU5	CASP8_HUMANCaspase-8 OS=Homo sapiens GN=CASP8 PE=1 SV=1	P	GO:0030154	cell differentiation
B6CGU5	CASP8_HUMANCaspase-8 OS=Homo sapiens GN=CASP8 PE=1 SV=1	P	GO:0035556	intracellular signal transduction
B6CGU5	CASP8_HUMANCaspase-8 OS=Homo sapiens GN=CASP8 PE=1 SV=1	P	GO:0043065	positive regulation of apoptotic process
B6CGU5	CASP8_HUMANCaspase-8 OS=Homo sapiens GN=CASP8 PE=1 SV=1	P	GO:0043085	positive regulation of catalytic activity
B6CGU5	CASP8_HUMANCaspase-8 OS=Homo sapiens GN=CASP8 PE=1 SV=1	P	GO:0045862	positive regulation of proteolysis
B6CGU5	CASP8_HUMANCaspase-8 OS=Homo sapiens GN=CASP8 PE=1 SV=1	P	GO:0048513	organ development
B6CGU5	CASP8_HUMANCaspase-8 OS=Homo sapiens GN=CASP8 PE=1 SV=1	P	GO:0048523	negative regulation of cellular process
B6CGU5	CASP8_HUMANCaspase-8 OS=Homo sapiens GN=CASP8 PE=1 SV=1	P	GO:0048584	positive regulation of response to stimulus
B6CGU5	CASP8_HUMANCaspase-8 OS=Homo sapiens GN=CASP8 PE=1 SV=1	P	GO:0065008	regulation of biological quality
B6CGU5	CASP8_HUMANCaspase-8 OS=Homo sapiens GN=CASP8 PE=1 SV=1	P	GO:0097191	extrinsic apoptotic signaling pathway
B6CGU5	CASP8_HUMANCaspase-8 OS=Homo sapiens GN=CASP8 PE=1 SV=1	P	GO:2000116	regulation of cysteine-type endopeptidase activity
B6CGU5	CASP8_HUMANCaspase-8 OS=Homo sapiens GN=CASP8 PE=1 SV=1	P	GO:2001233	regulation of apoptotic signaling pathway
Q9NY93	DDX56_HUMANProbable ATP-dependent RNA helicase DDX56 OS=Homo sapiens GN=DDX56 PE=1 SV=1	C	GO:0005730	nucleolus
Q9NY93	DDX56_HUMANProbable ATP-dependent RNA helicase DDX56 OS=Homo sapiens GN=DDX56 PE=1 SV=1	C	GO:0016020	membrane
Q9NY93	DDX56_HUMANProbable ATP-dependent RNA helicase DDX56 OS=Homo sapiens GN=DDX56 PE=1 SV=1	F	GO:0004004	ATP-dependent RNA helicase activity
Q9NY93	DDX56_HUMANProbable ATP-dependent RNA helicase DDX56 OS=Homo sapiens GN=DDX56 PE=1 SV=1	F	GO:0005524	ATP binding
Q9NY93	DDX56_HUMANProbable ATP-dependent RNA helicase DDX56 OS=Homo sapiens GN=DDX56 PE=1 SV=1	N	GO:0044822
Q9NY93	DDX56_HUMANProbable ATP-dependent RNA helicase DDX56 OS=Homo sapiens GN=DDX56 PE=1 SV=1	P	GO:0006396	RNA processing
Q9NY93	DDX56_HUMANProbable ATP-dependent RNA helicase DDX56 OS=Homo sapiens GN=DDX56 PE=1 SV=1	P	GO:0042254	ribosome biogenesis
Q9NY93	DDX56_HUMANProbable ATP-dependent RNA helicase DDX56 OS=Homo sapiens GN=DDX56 PE=1 SV=1	P	GO:0044699	single-organism process
Q9NY93	DDX56_HUMANProbable ATP-dependent RNA helicase DDX56 OS=Homo sapiens GN=DDX56 PE=1 SV=1	P	GO:0050794	regulation of cellular process
B3KRC6	CP51A_HUMANLanosterol 14-alpha demethylase OS=Homo sapiens GN=CYP51A1 PE=1 SV=3	C	GO:0005789	endoplasmic reticulum membrane
B3KRC6	CP51A_HUMANLanosterol 14-alpha demethylase OS=Homo sapiens GN=CYP51A1 PE=1 SV=3	C	GO:0005886	plasma membrane
B3KRC6	CP51A_HUMANLanosterol 14-alpha demethylase OS=Homo sapiens GN=CYP51A1 PE=1 SV=3	F	GO:0005506	iron ion binding
B3KRC6	CP51A_HUMANLanosterol 14-alpha demethylase OS=Homo sapiens GN=CYP51A1 PE=1 SV=3	F	GO:0008398	sterol 14-demethylase activity
B3KRC6	CP51A_HUMANLanosterol 14-alpha demethylase OS=Homo sapiens GN=CYP51A1 PE=1 SV=3	F	GO:0020037	heme binding
B3KRC6	CP51A_HUMANLanosterol 14-alpha demethylase OS=Homo sapiens GN=CYP51A1 PE=1 SV=3	P	GO:0006695	cholesterol biosynthetic process
B3KRC6	CP51A_HUMANLanosterol 14-alpha demethylase OS=Homo sapiens GN=CYP51A1 PE=1 SV=3	P	GO:0032787	monocarboxylic acid metabolic process
B3KRC6	CP51A_HUMANLanosterol 14-alpha demethylase OS=Homo sapiens GN=CYP51A1 PE=1 SV=3	P	GO:0044255	cellular lipid metabolic process
B3KRC6	CP51A_HUMANLanosterol 14-alpha demethylase OS=Homo sapiens GN=CYP51A1 PE=1 SV=3	P	GO:0055114	oxidation-reduction process
A0A097PY54	ATP6_HUMANATP synthase subunit a OS=Homo sapiens GN=MT-ATP6 PE=1 SV=1	C	GO:0005753	mitochondrial proton-transporting ATP synthase complex
A0A097PY54	ATP6_HUMANATP synthase subunit a OS=Homo sapiens GN=MT-ATP6 PE=1 SV=1	C	GO:0045263	proton-transporting ATP synthase complex, coupling factor F(o)
A0A097PY54	ATP6_HUMANATP synthase subunit a OS=Homo sapiens GN=MT-ATP6 PE=1 SV=1	C	GO:0070062	extracellular vesicular exosome
A0A097PY54	ATP6_HUMANATP synthase subunit a OS=Homo sapiens GN=MT-ATP6 PE=1 SV=1	F	GO:0015078	hydrogen ion transmembrane transporter activity
A0A097PY54	ATP6_HUMANATP synthase subunit a OS=Homo sapiens GN=MT-ATP6 PE=1 SV=1	F	GO:0016887	ATPase activity
A0A097PY54	ATP6_HUMANATP synthase subunit a OS=Homo sapiens GN=MT-ATP6 PE=1 SV=1	P	GO:0042776	mitochondrial ATP synthesis coupled proton transport
Q86U90	YRDC_HUMAN domain-containing mitochondrial OS=Homo sapiens GN=YRDC PE=1 SV=1	C	GO:0005737	cytoplasm
Q86U90	YRDC_HUMAN domain-containing mitochondrial OS=Homo sapiens GN=YRDC PE=1 SV=1	F	GO:0003725	double-stranded RNA binding
Q86U90	YRDC_HUMAN domain-containing mitochondrial OS=Homo sapiens GN=YRDC PE=1 SV=1	P	GO:0051051	negative regulation of transport
H3BMQ2	RLP24_HUMANProbable ribosome biogenesis RLP24 OS=Homo sapiens GN=RSL24D1 PE=1 SV=1	C	GO:0005730	nucleolus
H3BMQ2	RLP24_HUMANProbable ribosome biogenesis RLP24 OS=Homo sapiens GN=RSL24D1 PE=1 SV=1	C	GO:0005840	ribosome
H3BMQ2	RLP24_HUMANProbable ribosome biogenesis RLP24 OS=Homo sapiens GN=RSL24D1 PE=1 SV=1	F	GO:0005515	protein binding
H3BMQ2	RLP24_HUMANProbable ribosome biogenesis RLP24 OS=Homo sapiens GN=RSL24D1 PE=1 SV=1	P	GO:0022618	ribonucleoprotein complex assembly
H3BMQ2	RLP24_HUMANProbable ribosome biogenesis RLP24 OS=Homo sapiens GN=RSL24D1 PE=1 SV=1	P	GO:0042254	ribosome biogenesis
A5YRV2	MUC1_HUMANMucin-1 OS=Homo sapiens GN=MUC1 PE=1 SV=3	C	GO:0000790	nuclear chromatin
A5YRV2	MUC1_HUMANMucin-1 OS=Homo sapiens GN=MUC1 PE=1 SV=3	C	GO:0005615	extracellular space
A5YRV2	MUC1_HUMANMucin-1 OS=Homo sapiens GN=MUC1 PE=1 SV=3	C	GO:0005796	Golgi lumen
A5YRV2	MUC1_HUMANMucin-1 OS=Homo sapiens GN=MUC1 PE=1 SV=3	C	GO:0005887	integral to plasma membrane
A5YRV2	MUC1_HUMANMucin-1 OS=Homo sapiens GN=MUC1 PE=1 SV=3	C	GO:0070062	extracellular vesicular exosome
A5YRV2	MUC1_HUMANMucin-1 OS=Homo sapiens GN=MUC1 PE=1 SV=3	F	GO:0000978	RNA polymerase II core promoter proximal region sequence-specific DNA binding
A5YRV2	MUC1_HUMANMucin-1 OS=Homo sapiens GN=MUC1 PE=1 SV=3	F	GO:0002039	p53 binding
A5YRV2	MUC1_HUMANMucin-1 OS=Homo sapiens GN=MUC1 PE=1 SV=3	F	GO:0003712	transcription cofactor activity
A5YRV2	MUC1_HUMANMucin-1 OS=Homo sapiens GN=MUC1 PE=1 SV=3	P	GO:0006977	DNA damage response, signal transduction by p53 class mediator resulting in cell cycle arrest
A5YRV2	MUC1_HUMANMucin-1 OS=Homo sapiens GN=MUC1 PE=1 SV=3	P	GO:0006978	DNA damage response, signal transduction by p53 class mediator resulting in transcription of p21 class mediator
A5YRV2	MUC1_HUMANMucin-1 OS=Homo sapiens GN=MUC1 PE=1 SV=3	P	GO:0010944	negative regulation of transcription by competitive promoter binding
A5YRV2	MUC1_HUMANMucin-1 OS=Homo sapiens GN=MUC1 PE=1 SV=3	P	GO:0016266	O-glycan processing
A5YRV2	MUC1_HUMANMucin-1 OS=Homo sapiens GN=MUC1 PE=1 SV=3	P	GO:0033629	negative regulation of cell adhesion mediated by integrin
A5YRV2	MUC1_HUMANMucin-1 OS=Homo sapiens GN=MUC1 PE=1 SV=3	P	GO:0036003	positive regulation of transcription from RNA polymerase II promoter in response to stress
A5YRV2	MUC1_HUMANMucin-1 OS=Homo sapiens GN=MUC1 PE=1 SV=3	P	GO:0090240	positive regulation of histone H4 acetylation
A5YRV2	MUC1_HUMANMucin-1 OS=Homo sapiens GN=MUC1 PE=1 SV=3	P	GO:1902166	negative regulation of intrinsic apoptotic signaling pathway in response to DNA damage by p53 class mediator
A5YRV2	MUC1_HUMANMucin-1 OS=Homo sapiens GN=MUC1 PE=1 SV=3	C	GO:0005667	transcription factor complex
A5YRV2	MUC1_HUMANMucin-1 OS=Homo sapiens GN=MUC1 PE=1 SV=3	P	GO:0045449	regulation of transcription, DNA-dependent
P82914	RT15_HUMAN28S ribosomal mitochondrial OS=Homo sapiens GN=MRPS15 PE=1 SV=1	C	GO:0005743	mitochondrial inner membrane
P82914	RT15_HUMAN28S ribosomal mitochondrial OS=Homo sapiens GN=MRPS15 PE=1 SV=1	C	GO:0005763	mitochondrial small ribosomal subunit
P82914	RT15_HUMAN28S ribosomal mitochondrial OS=Homo sapiens GN=MRPS15 PE=1 SV=1	C	GO:0031965	nuclear membrane
P82914	RT15_HUMAN28S ribosomal mitochondrial OS=Homo sapiens GN=MRPS15 PE=1 SV=1	F	GO:0003735	structural constituent of ribosome
P82914	RT15_HUMAN28S ribosomal mitochondrial OS=Homo sapiens GN=MRPS15 PE=1 SV=1	N	GO:0044822
P82914	RT15_HUMAN28S ribosomal mitochondrial OS=Homo sapiens GN=MRPS15 PE=1 SV=1	P	GO:0070125	mitochondrial translational elongation
P82914	RT15_HUMAN28S ribosomal mitochondrial OS=Homo sapiens GN=MRPS15 PE=1 SV=1	P	GO:0070126	mitochondrial translational termination
P82914	RT15_HUMAN28S ribosomal mitochondrial OS=Homo sapiens GN=MRPS15 PE=1 SV=1	P	GO:0042254	ribosome biogenesis
Q5JXX1	MO4L2_HUMANMortality factor 4 2 OS=Homo sapiens GN=MORF4L2 PE=1 SV=1	C	GO:0005730	nucleolus
Q5JXX1	MO4L2_HUMANMortality factor 4 2 OS=Homo sapiens GN=MORF4L2 PE=1 SV=1	C	GO:0005886	plasma membrane
Q5JXX1	MO4L2_HUMANMortality factor 4 2 OS=Homo sapiens GN=MORF4L2 PE=1 SV=1	C	GO:0044451	nucleoplasm part
Q5JXX1	MO4L2_HUMANMortality factor 4 2 OS=Homo sapiens GN=MORF4L2 PE=1 SV=1	N	GO:1902494
Q5JXX1	MO4L2_HUMANMortality factor 4 2 OS=Homo sapiens GN=MORF4L2 PE=1 SV=1	F	GO:0005515	protein binding
Q5JXX1	MO4L2_HUMANMortality factor 4 2 OS=Homo sapiens GN=MORF4L2 PE=1 SV=1	P	GO:0006259	DNA metabolic process
Q5JXX1	MO4L2_HUMANMortality factor 4 2 OS=Homo sapiens GN=MORF4L2 PE=1 SV=1	P	GO:0006355	regulation of transcription, DNA-dependent
Q5JXX1	MO4L2_HUMANMortality factor 4 2 OS=Homo sapiens GN=MORF4L2 PE=1 SV=1	P	GO:0006974	response to DNA damage stimulus
Q5JXX1	MO4L2_HUMANMortality factor 4 2 OS=Homo sapiens GN=MORF4L2 PE=1 SV=1	P	GO:0016573	histone acetylation
Q5JXX1	MO4L2_HUMANMortality factor 4 2 OS=Homo sapiens GN=MORF4L2 PE=1 SV=1	P	GO:0044699	single-organism process
A8K201	RRP15_HUMANRRP15 OS=Homo sapiens GN=RRP15 PE=1 SV=2	C	GO:0005730	nucleolus
A8K201	RRP15_HUMANRRP15 OS=Homo sapiens GN=RRP15 PE=1 SV=2	C	GO:0005739	mitochondrion
A8K201	RRP15_HUMANRRP15 OS=Homo sapiens GN=RRP15 PE=1 SV=2	P	GO:0006364	rRNA processing
P62861	RS30_HUMAN40S ribosomal S30 OS=Homo sapiens GN=FAU PE=1 SV=1	C	GO:0005615	extracellular space
P62861	RS30_HUMAN40S ribosomal S30 OS=Homo sapiens GN=FAU PE=1 SV=1	C	GO:0005654	nucleoplasm
P62861	RS30_HUMAN40S ribosomal S30 OS=Homo sapiens GN=FAU PE=1 SV=1	C	GO:0022627	cytosolic small ribosomal subunit
P62861	RS30_HUMAN40S ribosomal S30 OS=Homo sapiens GN=FAU PE=1 SV=1	F	GO:0003723	RNA binding
P62861	RS30_HUMAN40S ribosomal S30 OS=Homo sapiens GN=FAU PE=1 SV=1	F	GO:0003735	structural constituent of ribosome
P62861	RS30_HUMAN40S ribosomal S30 OS=Homo sapiens GN=FAU PE=1 SV=1	P	GO:0000184	nuclear-transcribed mRNA catabolic process, nonsense-mediated decay
P62861	RS30_HUMAN40S ribosomal S30 OS=Homo sapiens GN=FAU PE=1 SV=1	P	GO:0002227	innate immune response in mucosa
P62861	RS30_HUMAN40S ribosomal S30 OS=Homo sapiens GN=FAU PE=1 SV=1	P	GO:0006364	rRNA processing
P62861	RS30_HUMAN40S ribosomal S30 OS=Homo sapiens GN=FAU PE=1 SV=1	P	GO:0006413	translational initiation
P62861	RS30_HUMAN40S ribosomal S30 OS=Homo sapiens GN=FAU PE=1 SV=1	P	GO:0006614	SRP-dependent cotranslational protein targeting to membrane
P62861	RS30_HUMAN40S ribosomal S30 OS=Homo sapiens GN=FAU PE=1 SV=1	P	GO:0019083	viral transcription
P62861	RS30_HUMAN40S ribosomal S30 OS=Homo sapiens GN=FAU PE=1 SV=1	P	GO:0019731	antibacterial humoral response
P62861	RS30_HUMAN40S ribosomal S30 OS=Homo sapiens GN=FAU PE=1 SV=1	P	GO:0050830	defense response to Gram-positive bacterium
Q9Y6H1	CHCH2_HUMANCoiled-coil-helix-coiled-coil-helix domain-containing 2 OS=Homo sapiens GN=CHCHD2 PE=1 SV=1	C	GO:0005634	nucleus
Q9Y6H1	CHCH2_HUMANCoiled-coil-helix-coiled-coil-helix domain-containing 2 OS=Homo sapiens GN=CHCHD2 PE=1 SV=1	C	GO:0005739	mitochondrion
Q9Y6H1	CHCH2_HUMANCoiled-coil-helix-coiled-coil-helix domain-containing 2 OS=Homo sapiens GN=CHCHD2 PE=1 SV=1	F	GO:0008134	transcription factor binding
Q9Y6H1	CHCH2_HUMANCoiled-coil-helix-coiled-coil-helix domain-containing 2 OS=Homo sapiens GN=CHCHD2 PE=1 SV=1	F	GO:0043565	sequence-specific DNA binding
Q9Y6H1	CHCH2_HUMANCoiled-coil-helix-coiled-coil-helix domain-containing 2 OS=Homo sapiens GN=CHCHD2 PE=1 SV=1	P	GO:0045944	positive regulation of transcription from RNA polymerase II promoter
Q9Y6H1	CHCH2_HUMANCoiled-coil-helix-coiled-coil-helix domain-containing 2 OS=Homo sapiens GN=CHCHD2 PE=1 SV=1	P	GO:1900037	regulation of cellular response to hypoxia
Q9Y6H1	CHCH2_HUMANCoiled-coil-helix-coiled-coil-helix domain-containing 2 OS=Homo sapiens GN=CHCHD2 PE=1 SV=1	C	GO:0005667	transcription factor complex
Q13823	NOG2_HUMANNucleolar GTP-binding 2 OS=Homo sapiens GN=GNL2 PE=1 SV=1	C	GO:0005730	nucleolus
Q13823	NOG2_HUMANNucleolar GTP-binding 2 OS=Homo sapiens GN=GNL2 PE=1 SV=1	C	GO:0016020	membrane
Q13823	NOG2_HUMANNucleolar GTP-binding 2 OS=Homo sapiens GN=GNL2 PE=1 SV=1	F	GO:0005525	GTP binding
Q13823	NOG2_HUMANNucleolar GTP-binding 2 OS=Homo sapiens GN=GNL2 PE=1 SV=1	F	GO:0016787	hydrolase activity
Q13823	NOG2_HUMANNucleolar GTP-binding 2 OS=Homo sapiens GN=GNL2 PE=1 SV=1	N	GO:0044822
Q13823	NOG2_HUMANNucleolar GTP-binding 2 OS=Homo sapiens GN=GNL2 PE=1 SV=1	P	GO:0031323	regulation of cellular metabolic process
Q13823	NOG2_HUMANNucleolar GTP-binding 2 OS=Homo sapiens GN=GNL2 PE=1 SV=1	P	GO:0060255	regulation of macromolecule metabolic process
Q13823	NOG2_HUMANNucleolar GTP-binding 2 OS=Homo sapiens GN=GNL2 PE=1 SV=1	P	GO:0080090	regulation of primary metabolic process
A6NLH6	CNIH4_HUMAN cornichon homolog 4 OS=Homo sapiens GN=CNIH4 PE=1 SV=1	C	GO:0005783	endoplasmic reticulum
A6NLH6	CNIH4_HUMAN cornichon homolog 4 OS=Homo sapiens GN=CNIH4 PE=1 SV=1	C	GO:0005793	endoplasmic reticulum-Golgi intermediate compartment
A6NLH6	CNIH4_HUMAN cornichon homolog 4 OS=Homo sapiens GN=CNIH4 PE=1 SV=1	C	GO:0016021	integral to membrane
A6NLH6	CNIH4_HUMAN cornichon homolog 4 OS=Homo sapiens GN=CNIH4 PE=1 SV=1	F	GO:0031730	CCR5 chemokine receptor binding
A6NLH6	CNIH4_HUMAN cornichon homolog 4 OS=Homo sapiens GN=CNIH4 PE=1 SV=1	P	GO:0006888	ER to Golgi vesicle-mediated transport
Q9HBR0	S38AA_HUMAN sodium-coupled neutral amino acid transporter 10 OS=Homo sapiens GN=SLC38A10 PE=1 SV=2	C	GO:0016020	membrane
Q9HBR0	S38AA_HUMAN sodium-coupled neutral amino acid transporter 10 OS=Homo sapiens GN=SLC38A10 PE=1 SV=2	F	GO:0015171	amino acid transmembrane transporter activity
Q9HBR0	S38AA_HUMAN sodium-coupled neutral amino acid transporter 10 OS=Homo sapiens GN=SLC38A10 PE=1 SV=2	P	GO:0003333	amino acid transmembrane transport
Q9HBR0	S38AA_HUMAN sodium-coupled neutral amino acid transporter 10 OS=Homo sapiens GN=SLC38A10 PE=1 SV=2	P	GO:0032501	multicellular organismal process
Q9HBR0	S38AA_HUMAN sodium-coupled neutral amino acid transporter 10 OS=Homo sapiens GN=SLC38A10 PE=1 SV=2	P	GO:0046942	carboxylic acid transport
Q8N5I2	ARRD1_HUMANArrestin domain-containing 1 OS=Homo sapiens GN=ARRDC1 PE=1 SV=1	C	GO:0005886	plasma membrane
Q8N5I2	ARRD1_HUMANArrestin domain-containing 1 OS=Homo sapiens GN=ARRDC1 PE=1 SV=1	C	GO:0031410	cytoplasmic vesicle
Q8N5I2	ARRD1_HUMANArrestin domain-containing 1 OS=Homo sapiens GN=ARRDC1 PE=1 SV=1	C	GO:0070062	extracellular vesicular exosome
Q8N5I2	ARRD1_HUMANArrestin domain-containing 1 OS=Homo sapiens GN=ARRDC1 PE=1 SV=1	P	GO:0050794	regulation of cellular process
Q8N5I2	ARRD1_HUMANArrestin domain-containing 1 OS=Homo sapiens GN=ARRDC1 PE=1 SV=1	P	GO:0050896	response to stimulus
B4DE67	LICH_HUMANLysosomal acid lipase cholesteryl ester hydrolase OS=Homo sapiens GN=LIPA PE=1 SV=2	C	GO:0005764	lysosome
B4DE67	LICH_HUMANLysosomal acid lipase cholesteryl ester hydrolase OS=Homo sapiens GN=LIPA PE=1 SV=2	C	GO:0070062	extracellular vesicular exosome
B4DE67	LICH_HUMANLysosomal acid lipase cholesteryl ester hydrolase OS=Homo sapiens GN=LIPA PE=1 SV=2	F	GO:0004771	sterol esterase activity
B4DE67	LICH_HUMANLysosomal acid lipase cholesteryl ester hydrolase OS=Homo sapiens GN=LIPA PE=1 SV=2	P	GO:0044707	single-multicellular organism process
B4DE67	LICH_HUMANLysosomal acid lipase cholesteryl ester hydrolase OS=Homo sapiens GN=LIPA PE=1 SV=2	P	GO:0006699	bile acid biosynthetic process
Q8NEF9	SRFB1_HUMANSerum response factor-binding 1 OS=Homo sapiens GN=SRFBP1 PE=1 SV=1	C	GO:0044424	intracellular part
Q8NEF9	SRFB1_HUMANSerum response factor-binding 1 OS=Homo sapiens GN=SRFBP1 PE=1 SV=1	N	GO:0044822
Q8NEF9	SRFB1_HUMANSerum response factor-binding 1 OS=Homo sapiens GN=SRFBP1 PE=1 SV=1	P	GO:0010467	gene expression
Q8NEF9	SRFB1_HUMANSerum response factor-binding 1 OS=Homo sapiens GN=SRFBP1 PE=1 SV=1	P	GO:0016070	RNA metabolic process
F6TR53	H1BP3_HUMANHCLS1-binding 3 OS=Homo sapiens GN=HS1BP3 PE=1 SV=1	C	GO:0005739	mitochondrion
F6TR53	H1BP3_HUMANHCLS1-binding 3 OS=Homo sapiens GN=HS1BP3 PE=1 SV=1	C	GO:0005783	endoplasmic reticulum
F6TR53	H1BP3_HUMANHCLS1-binding 3 OS=Homo sapiens GN=HS1BP3 PE=1 SV=1	F	GO:0035091	phosphatidylinositol binding
F6TR53	H1BP3_HUMANHCLS1-binding 3 OS=Homo sapiens GN=HS1BP3 PE=1 SV=1	P	GO:0042981	regulation of apoptotic process
Q96GA3	LTV1_HUMAN LTV1 homolog OS=Homo sapiens GN=LTV1 PE=1 SV=1	C	GO:0005654	nucleoplasm
Q96GA3	LTV1_HUMAN LTV1 homolog OS=Homo sapiens GN=LTV1 PE=1 SV=1	C	GO:0005829	cytosol
Q96GA3	LTV1_HUMAN LTV1 homolog OS=Homo sapiens GN=LTV1 PE=1 SV=1	F	GO:0005515	protein binding
Q96GA3	LTV1_HUMAN LTV1 homolog OS=Homo sapiens GN=LTV1 PE=1 SV=1	P	GO:0006364	rRNA processing
A0A024R7S3	CLCB_HUMANClathrin light chain B OS=Homo sapiens GN=CLTB PE=1 SV=1	C	GO:0030130	clathrin coat of trans-Golgi network vesicle
A0A024R7S3	CLCB_HUMANClathrin light chain B OS=Homo sapiens GN=CLTB PE=1 SV=1	C	GO:0030132	clathrin coat of coated pit
A0A024R7S3	CLCB_HUMANClathrin light chain B OS=Homo sapiens GN=CLTB PE=1 SV=1	F	GO:0005198	structural molecule activity
A0A024R7S3	CLCB_HUMANClathrin light chain B OS=Homo sapiens GN=CLTB PE=1 SV=1	F	GO:0005515	protein binding
A0A024R7S3	CLCB_HUMANClathrin light chain B OS=Homo sapiens GN=CLTB PE=1 SV=1	P	GO:0006886	intracellular protein transport
A0A024R7S3	CLCB_HUMANClathrin light chain B OS=Homo sapiens GN=CLTB PE=1 SV=1	P	GO:0016192	vesicle-mediated transport
D6RBD9	TXD15_HUMANThioredoxin domain-containing 15 OS=Homo sapiens GN=TXNDC15 PE=1 SV=1	C	GO:0005623	cell
D6RBD9	TXD15_HUMANThioredoxin domain-containing 15 OS=Homo sapiens GN=TXNDC15 PE=1 SV=1	C	GO:0016021	integral to membrane
D6RBD9	TXD15_HUMANThioredoxin domain-containing 15 OS=Homo sapiens GN=TXNDC15 PE=1 SV=1	P	GO:0045454	cell redox homeostasis
Q96T88	UHRF1_HUMANE3 ubiquitin- ligase UHRF1 OS=Homo sapiens GN=UHRF1 PE=1 SV=1	C	GO:0000790	nuclear chromatin
Q96T88	UHRF1_HUMANE3 ubiquitin- ligase UHRF1 OS=Homo sapiens GN=UHRF1 PE=1 SV=1	C	GO:0000791	euchromatin
Q96T88	UHRF1_HUMANE3 ubiquitin- ligase UHRF1 OS=Homo sapiens GN=UHRF1 PE=1 SV=1	C	GO:0000792	heterochromatin
Q96T88	UHRF1_HUMANE3 ubiquitin- ligase UHRF1 OS=Homo sapiens GN=UHRF1 PE=1 SV=1	C	GO:0005657	replication fork
Q96T88	UHRF1_HUMANE3 ubiquitin- ligase UHRF1 OS=Homo sapiens GN=UHRF1 PE=1 SV=1	F	GO:0000987	core promoter proximal region sequence-specific DNA binding
Q96T88	UHRF1_HUMANE3 ubiquitin- ligase UHRF1 OS=Homo sapiens GN=UHRF1 PE=1 SV=1	F	GO:0003682	chromatin binding
Q96T88	UHRF1_HUMANE3 ubiquitin- ligase UHRF1 OS=Homo sapiens GN=UHRF1 PE=1 SV=1	F	GO:0003700	sequence-specific DNA binding transcription factor activity
Q96T88	UHRF1_HUMANE3 ubiquitin- ligase UHRF1 OS=Homo sapiens GN=UHRF1 PE=1 SV=1	F	GO:0004842	ubiquitin-protein ligase activity
Q96T88	UHRF1_HUMANE3 ubiquitin- ligase UHRF1 OS=Homo sapiens GN=UHRF1 PE=1 SV=1	F	GO:0008270	zinc ion binding
Q96T88	UHRF1_HUMANE3 ubiquitin- ligase UHRF1 OS=Homo sapiens GN=UHRF1 PE=1 SV=1	F	GO:0008327	methyl-CpG binding
Q96T88	UHRF1_HUMANE3 ubiquitin- ligase UHRF1 OS=Homo sapiens GN=UHRF1 PE=1 SV=1	F	GO:0035064	methylated histone residue binding
Q96T88	UHRF1_HUMANE3 ubiquitin- ligase UHRF1 OS=Homo sapiens GN=UHRF1 PE=1 SV=1	F	GO:0044729	hemi-methylated DNA-binding
Q96T88	UHRF1_HUMANE3 ubiquitin- ligase UHRF1 OS=Homo sapiens GN=UHRF1 PE=1 SV=1	P	GO:0000122	negative regulation of transcription from RNA polymerase II promoter
Q96T88	UHRF1_HUMANE3 ubiquitin- ligase UHRF1 OS=Homo sapiens GN=UHRF1 PE=1 SV=1	P	GO:0007275	multicellular organismal development
Q96T88	UHRF1_HUMANE3 ubiquitin- ligase UHRF1 OS=Homo sapiens GN=UHRF1 PE=1 SV=1	P	GO:0008283	cell proliferation
Q96T88	UHRF1_HUMANE3 ubiquitin- ligase UHRF1 OS=Homo sapiens GN=UHRF1 PE=1 SV=1	P	GO:0010216	maintenance of DNA methylation
Q96T88	UHRF1_HUMANE3 ubiquitin- ligase UHRF1 OS=Homo sapiens GN=UHRF1 PE=1 SV=1	P	GO:0016574	histone ubiquitination
Q96T88	UHRF1_HUMANE3 ubiquitin- ligase UHRF1 OS=Homo sapiens GN=UHRF1 PE=1 SV=1	P	GO:0032270	positive regulation of cellular protein metabolic process
Q96T88	UHRF1_HUMANE3 ubiquitin- ligase UHRF1 OS=Homo sapiens GN=UHRF1 PE=1 SV=1	P	GO:0042787	protein ubiquitination involved in ubiquitin-dependent protein catabolic process
Q96T88	UHRF1_HUMANE3 ubiquitin- ligase UHRF1 OS=Homo sapiens GN=UHRF1 PE=1 SV=1	P	GO:0044763	single-organism cellular process
Q96T88	UHRF1_HUMANE3 ubiquitin- ligase UHRF1 OS=Homo sapiens GN=UHRF1 PE=1 SV=1	P	GO:0045944	positive regulation of transcription from RNA polymerase II promoter
Q96T88	UHRF1_HUMANE3 ubiquitin- ligase UHRF1 OS=Homo sapiens GN=UHRF1 PE=1 SV=1	P	GO:0051716	cellular response to stimulus
Q96T88	UHRF1_HUMANE3 ubiquitin- ligase UHRF1 OS=Homo sapiens GN=UHRF1 PE=1 SV=1	P	GO:0051865	protein autoubiquitination
Q96T88	UHRF1_HUMANE3 ubiquitin- ligase UHRF1 OS=Homo sapiens GN=UHRF1 PE=1 SV=1	P	GO:1902275	regulation of chromatin organization
Q96T88	UHRF1_HUMANE3 ubiquitin- ligase UHRF1 OS=Homo sapiens GN=UHRF1 PE=1 SV=1	P	GO:2000373	positive regulation of DNA topoisomerase (ATP-hydrolyzing) activity
Q96T88	UHRF1_HUMANE3 ubiquitin- ligase UHRF1 OS=Homo sapiens GN=UHRF1 PE=1 SV=1	C	GO:0005667	transcription factor complex
Q96T88	UHRF1_HUMANE3 ubiquitin- ligase UHRF1 OS=Homo sapiens GN=UHRF1 PE=1 SV=1	P	GO:0045449	regulation of transcription, DNA-dependent
Q9H9Y2	RPF1_HUMANRibosome production factor 1 OS=Homo sapiens GN=RPF1 PE=1 SV=2	C	GO:0005730	nucleolus
Q9H9Y2	RPF1_HUMANRibosome production factor 1 OS=Homo sapiens GN=RPF1 PE=1 SV=2	C	GO:0030684	preribosome
Q9H9Y2	RPF1_HUMANRibosome production factor 1 OS=Homo sapiens GN=RPF1 PE=1 SV=2	F	GO:0005515	protein binding
Q9H9Y2	RPF1_HUMANRibosome production factor 1 OS=Homo sapiens GN=RPF1 PE=1 SV=2	F	GO:0019843	rRNA binding
Q9H9Y2	RPF1_HUMANRibosome production factor 1 OS=Homo sapiens GN=RPF1 PE=1 SV=2	N	GO:0044822
Q9H9Y2	RPF1_HUMANRibosome production factor 1 OS=Homo sapiens GN=RPF1 PE=1 SV=2	P	GO:0006364	rRNA processing
Q9H9Y2	RPF1_HUMANRibosome production factor 1 OS=Homo sapiens GN=RPF1 PE=1 SV=2	P	GO:0042273	ribosomal large subunit biogenesis
O95478	NSA2_HUMANRibosome biogenesis NSA2 homolog OS=Homo sapiens GN=NSA2 PE=1 SV=1	C	GO:0005730	nucleolus
O95478	NSA2_HUMANRibosome biogenesis NSA2 homolog OS=Homo sapiens GN=NSA2 PE=1 SV=1	C	GO:0030529	ribonucleoprotein complex
O95478	NSA2_HUMANRibosome biogenesis NSA2 homolog OS=Homo sapiens GN=NSA2 PE=1 SV=1	N	GO:0044822
O95478	NSA2_HUMANRibosome biogenesis NSA2 homolog OS=Homo sapiens GN=NSA2 PE=1 SV=1	P	GO:0006364	rRNA processing
A0A0S2Z5K6	SIL1_HUMANNucleotide exchange factor SIL1 OS=Homo sapiens GN=SIL1 PE=1 SV=1	F	GO:0005515	protein binding
H0YNP9	MESH1_HUMANGuanosine-3 ,5 -bis(diphosphate) 3 -pyrophosphohydrolase MESH1 OS=Homo sapiens GN=HDDC3 PE=1 SV=3	F	GO:0005515	protein binding
H0YNP9	MESH1_HUMANGuanosine-3 ,5 -bis(diphosphate) 3 -pyrophosphohydrolase MESH1 OS=Homo sapiens GN=HDDC3 PE=1 SV=3	F	GO:0016787	hydrolase activity
O43805	SSNA1_HUMANSjoegren syndrome nuclear autoantigen 1 OS=Homo sapiens GN=SSNA1 PE=1 SV=2	C	GO:0005634	nucleus
O43805	SSNA1_HUMANSjoegren syndrome nuclear autoantigen 1 OS=Homo sapiens GN=SSNA1 PE=1 SV=2	C	GO:0005813	centrosome
O43805	SSNA1_HUMANSjoegren syndrome nuclear autoantigen 1 OS=Homo sapiens GN=SSNA1 PE=1 SV=2	C	GO:0005829	cytosol
O43805	SSNA1_HUMANSjoegren syndrome nuclear autoantigen 1 OS=Homo sapiens GN=SSNA1 PE=1 SV=2	F	GO:0005515	protein binding
O43805	SSNA1_HUMANSjoegren syndrome nuclear autoantigen 1 OS=Homo sapiens GN=SSNA1 PE=1 SV=2	P	GO:0000086	G2/M transition of mitotic cell cycle
B3KNS8	SURF6_HUMANSurfeit locus 6 OS=Homo sapiens GN=SURF6 PE=1 SV=3	C	GO:0005730	nucleolus
B3KNS8	SURF6_HUMANSurfeit locus 6 OS=Homo sapiens GN=SURF6 PE=1 SV=3	N	GO:0044822
Q92604	LGAT1_HUMANAcyl- :lysophosphatidylglycerol acyltransferase 1 OS=Homo sapiens GN=LPGAT1 PE=1 SV=1	C	GO:0005789	endoplasmic reticulum membrane
Q92604	LGAT1_HUMANAcyl- :lysophosphatidylglycerol acyltransferase 1 OS=Homo sapiens GN=LPGAT1 PE=1 SV=1	F	GO:0003841	1-acylglycerol-3-phosphate O-acyltransferase activity
Q92604	LGAT1_HUMANAcyl- :lysophosphatidylglycerol acyltransferase 1 OS=Homo sapiens GN=LPGAT1 PE=1 SV=1	F	GO:0047144	2-acylglycerol-3-phosphate O-acyltransferase activity
Q92604	LGAT1_HUMANAcyl- :lysophosphatidylglycerol acyltransferase 1 OS=Homo sapiens GN=LPGAT1 PE=1 SV=1	P	GO:0036148	phosphatidylglycerol acyl-chain remodeling
Q92604	LGAT1_HUMANAcyl- :lysophosphatidylglycerol acyltransferase 1 OS=Homo sapiens GN=LPGAT1 PE=1 SV=1	P	GO:0008654	phospholipid biosynthetic process
Q92604	LGAT1_HUMANAcyl- :lysophosphatidylglycerol acyltransferase 1 OS=Homo sapiens GN=LPGAT1 PE=1 SV=1	P	GO:0042967	acyl-carrier-protein biosynthetic process
Q75MX0	SEM3C_HUMANSemaphorin-3C OS=Homo sapiens GN=SEMA3C PE=2 SV=2	C	GO:0070062	extracellular vesicular exosome
Q75MX0	SEM3C_HUMANSemaphorin-3C OS=Homo sapiens GN=SEMA3C PE=2 SV=2	F	GO:0005102	receptor binding
Q75MX0	SEM3C_HUMANSemaphorin-3C OS=Homo sapiens GN=SEMA3C PE=2 SV=2	P	GO:0001755	neural crest cell migration
Q75MX0	SEM3C_HUMANSemaphorin-3C OS=Homo sapiens GN=SEMA3C PE=2 SV=2	P	GO:0006955	immune response
Q75MX0	SEM3C_HUMANSemaphorin-3C OS=Homo sapiens GN=SEMA3C PE=2 SV=2	P	GO:0021675	nerve development
Q75MX0	SEM3C_HUMANSemaphorin-3C OS=Homo sapiens GN=SEMA3C PE=2 SV=2	P	GO:0030335	positive regulation of cell migration
Q75MX0	SEM3C_HUMANSemaphorin-3C OS=Homo sapiens GN=SEMA3C PE=2 SV=2	P	GO:0030517	negative regulation of axon extension
Q75MX0	SEM3C_HUMANSemaphorin-3C OS=Homo sapiens GN=SEMA3C PE=2 SV=2	P	GO:0040013	negative regulation of locomotion
Q75MX0	SEM3C_HUMANSemaphorin-3C OS=Homo sapiens GN=SEMA3C PE=2 SV=2	P	GO:0042493	response to drug
Q75MX0	SEM3C_HUMANSemaphorin-3C OS=Homo sapiens GN=SEMA3C PE=2 SV=2	P	GO:0048841	regulation of axon extension involved in axon guidance
Q75MX0	SEM3C_HUMANSemaphorin-3C OS=Homo sapiens GN=SEMA3C PE=2 SV=2	P	GO:0051271	negative regulation of cellular component movement
Q75MX0	SEM3C_HUMANSemaphorin-3C OS=Homo sapiens GN=SEMA3C PE=2 SV=2	P	GO:0071526	semaphorin-plexin signaling pathway
Q75MX0	SEM3C_HUMANSemaphorin-3C OS=Homo sapiens GN=SEMA3C PE=2 SV=2	P	GO:0072359	circulatory system development
C9JCN8	FOSL2_HUMANFos-related antigen 2 OS=Homo sapiens GN=FOSL2 PE=1 SV=1	C	GO:0005654	nucleoplasm
C9JCN8	FOSL2_HUMANFos-related antigen 2 OS=Homo sapiens GN=FOSL2 PE=1 SV=1	F	GO:0000977	RNA polymerase II regulatory region sequence-specific DNA binding
C9JCN8	FOSL2_HUMANFos-related antigen 2 OS=Homo sapiens GN=FOSL2 PE=1 SV=1	F	GO:0000982	RNA polymerase II core promoter proximal region sequence-specific DNA binding transcription factor activity
C9JCN8	FOSL2_HUMANFos-related antigen 2 OS=Homo sapiens GN=FOSL2 PE=1 SV=1	F	GO:0008134	transcription factor binding
C9JCN8	FOSL2_HUMANFos-related antigen 2 OS=Homo sapiens GN=FOSL2 PE=1 SV=1	P	GO:0006357	regulation of transcription from RNA polymerase II promoter
C9JCN8	FOSL2_HUMANFos-related antigen 2 OS=Homo sapiens GN=FOSL2 PE=1 SV=1	P	GO:0007165	signal transduction
C9JCN8	FOSL2_HUMANFos-related antigen 2 OS=Homo sapiens GN=FOSL2 PE=1 SV=1	P	GO:0008219	cell death
C9JCN8	FOSL2_HUMANFos-related antigen 2 OS=Homo sapiens GN=FOSL2 PE=1 SV=1	P	GO:0009605	response to external stimulus
C9JCN8	FOSL2_HUMANFos-related antigen 2 OS=Homo sapiens GN=FOSL2 PE=1 SV=1	P	GO:0009628	response to abiotic stimulus
C9JCN8	FOSL2_HUMANFos-related antigen 2 OS=Homo sapiens GN=FOSL2 PE=1 SV=1	P	GO:0009719	response to endogenous stimulus
C9JCN8	FOSL2_HUMANFos-related antigen 2 OS=Homo sapiens GN=FOSL2 PE=1 SV=1	P	GO:0010605	negative regulation of macromolecule metabolic process
C9JCN8	FOSL2_HUMANFos-related antigen 2 OS=Homo sapiens GN=FOSL2 PE=1 SV=1	P	GO:0030154	cell differentiation
C9JCN8	FOSL2_HUMANFos-related antigen 2 OS=Homo sapiens GN=FOSL2 PE=1 SV=1	P	GO:0031324	negative regulation of cellular metabolic process
C9JCN8	FOSL2_HUMANFos-related antigen 2 OS=Homo sapiens GN=FOSL2 PE=1 SV=1	P	GO:0033554	cellular response to stress
C9JCN8	FOSL2_HUMANFos-related antigen 2 OS=Homo sapiens GN=FOSL2 PE=1 SV=1	P	GO:0042127	regulation of cell proliferation
C9JCN8	FOSL2_HUMANFos-related antigen 2 OS=Homo sapiens GN=FOSL2 PE=1 SV=1	P	GO:0045893	positive regulation of transcription, DNA-dependent
C9JCN8	FOSL2_HUMANFos-related antigen 2 OS=Homo sapiens GN=FOSL2 PE=1 SV=1	P	GO:0048513	organ development
C9JCN8	FOSL2_HUMANFos-related antigen 2 OS=Homo sapiens GN=FOSL2 PE=1 SV=1	P	GO:0051128	regulation of cellular component organization
C9JCN8	FOSL2_HUMANFos-related antigen 2 OS=Homo sapiens GN=FOSL2 PE=1 SV=1	P	GO:0051704	multi-organism process
C9JCN8	FOSL2_HUMANFos-related antigen 2 OS=Homo sapiens GN=FOSL2 PE=1 SV=1	P	GO:0071310	cellular response to organic substance
C9JCN8	FOSL2_HUMANFos-related antigen 2 OS=Homo sapiens GN=FOSL2 PE=1 SV=1	P	GO:1901700	response to oxygen-containing compound
C9JCN8	FOSL2_HUMANFos-related antigen 2 OS=Homo sapiens GN=FOSL2 PE=1 SV=1	C	GO:0005667	transcription factor complex
Q6FHK1	RM28_HUMAN39S ribosomal mitochondrial OS=Homo sapiens GN=MRPL28 PE=1 SV=4	C	GO:0005743	mitochondrial inner membrane
Q6FHK1	RM28_HUMAN39S ribosomal mitochondrial OS=Homo sapiens GN=MRPL28 PE=1 SV=4	C	GO:0005761	mitochondrial ribosome
Q6FHK1	RM28_HUMAN39S ribosomal mitochondrial OS=Homo sapiens GN=MRPL28 PE=1 SV=4	F	GO:0003735	structural constituent of ribosome
Q6FHK1	RM28_HUMAN39S ribosomal mitochondrial OS=Homo sapiens GN=MRPL28 PE=1 SV=4	F	GO:0005515	protein binding
Q6FHK1	RM28_HUMAN39S ribosomal mitochondrial OS=Homo sapiens GN=MRPL28 PE=1 SV=4	N	GO:0044822
Q6FHK1	RM28_HUMAN39S ribosomal mitochondrial OS=Homo sapiens GN=MRPL28 PE=1 SV=4	P	GO:0070125	mitochondrial translational elongation
Q6FHK1	RM28_HUMAN39S ribosomal mitochondrial OS=Homo sapiens GN=MRPL28 PE=1 SV=4	P	GO:0070126	mitochondrial translational termination
Q6FHK1	RM28_HUMAN39S ribosomal mitochondrial OS=Homo sapiens GN=MRPL28 PE=1 SV=4	P	GO:0042254	ribosome biogenesis
B4DE48	SNX17_HUMANSorting nexin-17 OS=Homo sapiens GN=SNX17 PE=1 SV=1	C	GO:0005769	early endosome
B4DE48	SNX17_HUMANSorting nexin-17 OS=Homo sapiens GN=SNX17 PE=1 SV=1	C	GO:0005794	Golgi apparatus
B4DE48	SNX17_HUMANSorting nexin-17 OS=Homo sapiens GN=SNX17 PE=1 SV=1	C	GO:0005829	cytosol
B4DE48	SNX17_HUMANSorting nexin-17 OS=Homo sapiens GN=SNX17 PE=1 SV=1	C	GO:0010008	endosome membrane
B4DE48	SNX17_HUMANSorting nexin-17 OS=Homo sapiens GN=SNX17 PE=1 SV=1	C	GO:0016023	cytoplasmic membrane-bounded vesicle
B4DE48	SNX17_HUMANSorting nexin-17 OS=Homo sapiens GN=SNX17 PE=1 SV=1	C	GO:0043234	protein complex
B4DE48	SNX17_HUMANSorting nexin-17 OS=Homo sapiens GN=SNX17 PE=1 SV=1	F	GO:0008022	protein C-terminus binding
B4DE48	SNX17_HUMANSorting nexin-17 OS=Homo sapiens GN=SNX17 PE=1 SV=1	F	GO:0035091	phosphatidylinositol binding
B4DE48	SNX17_HUMANSorting nexin-17 OS=Homo sapiens GN=SNX17 PE=1 SV=1	F	GO:0050750	low-density lipoprotein particle receptor binding
B4DE48	SNX17_HUMANSorting nexin-17 OS=Homo sapiens GN=SNX17 PE=1 SV=1	P	GO:0006707	cholesterol catabolic process
B4DE48	SNX17_HUMANSorting nexin-17 OS=Homo sapiens GN=SNX17 PE=1 SV=1	P	GO:0007165	signal transduction
B4DE48	SNX17_HUMANSorting nexin-17 OS=Homo sapiens GN=SNX17 PE=1 SV=1	P	GO:0015031	protein transport
B4DE48	SNX17_HUMANSorting nexin-17 OS=Homo sapiens GN=SNX17 PE=1 SV=1	P	GO:0016192	vesicle-mediated transport
B4DE48	SNX17_HUMANSorting nexin-17 OS=Homo sapiens GN=SNX17 PE=1 SV=1	P	GO:0016197	endosomal transport
B4DE48	SNX17_HUMANSorting nexin-17 OS=Homo sapiens GN=SNX17 PE=1 SV=1	P	GO:0046907	intracellular transport
O00458	IFRD1_HUMANInterferon-related developmental regulator 1 OS=Homo sapiens GN=IFRD1 PE=1 SV=4	F	GO:0005488	binding
O00458	IFRD1_HUMANInterferon-related developmental regulator 1 OS=Homo sapiens GN=IFRD1 PE=1 SV=4	P	GO:0007518	myoblast fate determination
B4DYY3	BBS1_HUMANBardet-Biedl syndrome 1 OS=Homo sapiens GN=BBS1 PE=1 SV=1	C	GO:0005813	centrosome
B4DYY3	BBS1_HUMANBardet-Biedl syndrome 1 OS=Homo sapiens GN=BBS1 PE=1 SV=1	C	GO:0034464	BBSome
B4DYY3	BBS1_HUMANBardet-Biedl syndrome 1 OS=Homo sapiens GN=BBS1 PE=1 SV=1	F	GO:0001103	RNA polymerase II repressing transcription factor binding
B4DYY3	BBS1_HUMANBardet-Biedl syndrome 1 OS=Homo sapiens GN=BBS1 PE=1 SV=1	F	GO:0005113	patched binding
B4DYY3	BBS1_HUMANBardet-Biedl syndrome 1 OS=Homo sapiens GN=BBS1 PE=1 SV=1	F	GO:0005119	smoothened binding
B4DYY3	BBS1_HUMANBardet-Biedl syndrome 1 OS=Homo sapiens GN=BBS1 PE=1 SV=1	P	GO:0035058	nonmotile primary cilium assembly
B4DYY3	BBS1_HUMANBardet-Biedl syndrome 1 OS=Homo sapiens GN=BBS1 PE=1 SV=1	P	GO:0043001	Golgi to plasma membrane protein transport
B4DYY3	BBS1_HUMANBardet-Biedl syndrome 1 OS=Homo sapiens GN=BBS1 PE=1 SV=1	P	GO:0045494	photoreceptor cell maintenance
B4DYY3	BBS1_HUMANBardet-Biedl syndrome 1 OS=Homo sapiens GN=BBS1 PE=1 SV=1	P	GO:0061512	protein localization to cilium
B4DYY3	BBS1_HUMANBardet-Biedl syndrome 1 OS=Homo sapiens GN=BBS1 PE=1 SV=1	N	GO:1905515
B4DYY3	BBS1_HUMANBardet-Biedl syndrome 1 OS=Homo sapiens GN=BBS1 PE=1 SV=1	P	GO:0007165	signal transduction
Q5T280	CI114_HUMAN methyltransferase C9orf114 OS=Homo sapiens GN=C9orf114 PE=1 SV=3	C	GO:0005694	chromosome
Q5T280	CI114_HUMAN methyltransferase C9orf114 OS=Homo sapiens GN=C9orf114 PE=1 SV=3	N	GO:0044822
F1JVV5	EWS_HUMANRNA-binding EWS OS=Homo sapiens GN=EWSR1 PE=1 SV=1	C	GO:0000785	chromatin
F1JVV5	EWS_HUMANRNA-binding EWS OS=Homo sapiens GN=EWSR1 PE=1 SV=1	C	GO:0005654	nucleoplasm
F1JVV5	EWS_HUMANRNA-binding EWS OS=Homo sapiens GN=EWSR1 PE=1 SV=1	C	GO:0005730	nucleolus
F1JVV5	EWS_HUMANRNA-binding EWS OS=Homo sapiens GN=EWSR1 PE=1 SV=1	C	GO:0005737	cytoplasm
F1JVV5	EWS_HUMANRNA-binding EWS OS=Homo sapiens GN=EWSR1 PE=1 SV=1	N	GO:1990590
F1JVV5	EWS_HUMANRNA-binding EWS OS=Homo sapiens GN=EWSR1 PE=1 SV=1	F	GO:0000977	RNA polymerase II regulatory region sequence-specific DNA binding
F1JVV5	EWS_HUMANRNA-binding EWS OS=Homo sapiens GN=EWSR1 PE=1 SV=1	F	GO:0001228	RNA polymerase II transcription regulatory region sequence-specific DNA binding transcription factor activity involved in positive regulation of transcription
F1JVV5	EWS_HUMANRNA-binding EWS OS=Homo sapiens GN=EWSR1 PE=1 SV=1	F	GO:0008134	transcription factor binding
F1JVV5	EWS_HUMANRNA-binding EWS OS=Homo sapiens GN=EWSR1 PE=1 SV=1	F	GO:0042802	identical protein binding
F1JVV5	EWS_HUMANRNA-binding EWS OS=Homo sapiens GN=EWSR1 PE=1 SV=1	N	GO:0044822
F1JVV5	EWS_HUMANRNA-binding EWS OS=Homo sapiens GN=EWSR1 PE=1 SV=1	F	GO:0046982	protein heterodimerization activity
F1JVV5	EWS_HUMANRNA-binding EWS OS=Homo sapiens GN=EWSR1 PE=1 SV=1	P	GO:0007165	signal transduction
F1JVV5	EWS_HUMANRNA-binding EWS OS=Homo sapiens GN=EWSR1 PE=1 SV=1	P	GO:0009719	response to endogenous stimulus
F1JVV5	EWS_HUMANRNA-binding EWS OS=Homo sapiens GN=EWSR1 PE=1 SV=1	P	GO:0010629	negative regulation of gene expression
F1JVV5	EWS_HUMANRNA-binding EWS OS=Homo sapiens GN=EWSR1 PE=1 SV=1	P	GO:0016043	cellular component organization
F1JVV5	EWS_HUMANRNA-binding EWS OS=Homo sapiens GN=EWSR1 PE=1 SV=1	P	GO:0045595	regulation of cell differentiation
F1JVV5	EWS_HUMANRNA-binding EWS OS=Homo sapiens GN=EWSR1 PE=1 SV=1	P	GO:0045944	positive regulation of transcription from RNA polymerase II promoter
F1JVV5	EWS_HUMANRNA-binding EWS OS=Homo sapiens GN=EWSR1 PE=1 SV=1	P	GO:0048523	negative regulation of cellular process
F1JVV5	EWS_HUMANRNA-binding EWS OS=Homo sapiens GN=EWSR1 PE=1 SV=1	P	GO:0048699	generation of neurons
F1JVV5	EWS_HUMANRNA-binding EWS OS=Homo sapiens GN=EWSR1 PE=1 SV=1	P	GO:0051094	positive regulation of developmental process
F1JVV5	EWS_HUMANRNA-binding EWS OS=Homo sapiens GN=EWSR1 PE=1 SV=1	P	GO:0051240	positive regulation of multicellular organismal process
F1JVV5	EWS_HUMANRNA-binding EWS OS=Homo sapiens GN=EWSR1 PE=1 SV=1	P	GO:0071310	cellular response to organic substance
A0A024R8I8	SAPC2_HUMANSuppressor APC domain-containing 2 OS=Homo sapiens GN=SAPCD2 PE=1 SV=2	C	GO:0005730	nucleolus
A0A024R8I8	SAPC2_HUMANSuppressor APC domain-containing 2 OS=Homo sapiens GN=SAPCD2 PE=1 SV=2	C	GO:0005737	cytoplasm
B1ALI9	TXNIP_HUMANThioredoxin-interacting OS=Homo sapiens GN=TXNIP PE=1 SV=1	C	GO:0005829	cytosol
B1ALI9	TXNIP_HUMANThioredoxin-interacting OS=Homo sapiens GN=TXNIP PE=1 SV=1	C	GO:0043231	intracellular membrane-bounded organelle
B1ALI9	TXNIP_HUMANThioredoxin-interacting OS=Homo sapiens GN=TXNIP PE=1 SV=1	F	GO:0031625	ubiquitin protein ligase binding
B1ALI9	TXNIP_HUMANThioredoxin-interacting OS=Homo sapiens GN=TXNIP PE=1 SV=1	P	GO:0019222	regulation of metabolic process
B1ALI9	TXNIP_HUMANThioredoxin-interacting OS=Homo sapiens GN=TXNIP PE=1 SV=1	P	GO:0030216	keratinocyte differentiation
B1ALI9	TXNIP_HUMANThioredoxin-interacting OS=Homo sapiens GN=TXNIP PE=1 SV=1	P	GO:0051782	negative regulation of cell division
B1ALI9	TXNIP_HUMANThioredoxin-interacting OS=Homo sapiens GN=TXNIP PE=1 SV=1	P	GO:0071228	cellular response to tumor cell
B1ALI9	TXNIP_HUMANThioredoxin-interacting OS=Homo sapiens GN=TXNIP PE=1 SV=1	P	GO:1901700	response to oxygen-containing compound
B0AZV9	TPC6B_HUMANTrafficking particle complex subunit 6B OS=Homo sapiens GN=TRAPPC6B PE=1 SV=1	C	GO:0005829	cytosol
B0AZV9	TPC6B_HUMANTrafficking particle complex subunit 6B OS=Homo sapiens GN=TRAPPC6B PE=1 SV=1	F	GO:0005515	protein binding
B0AZV9	TPC6B_HUMANTrafficking particle complex subunit 6B OS=Homo sapiens GN=TRAPPC6B PE=1 SV=1	P	GO:0048208	COPII vesicle coating
B4DND9	GSCR2_HUMANGlioma tumor suppressor candidate region gene 2 OS=Homo sapiens GN=GLTSCR2 PE=1 SV=2	C	GO:0005730	nucleolus
B4DND9	GSCR2_HUMANGlioma tumor suppressor candidate region gene 2 OS=Homo sapiens GN=GLTSCR2 PE=1 SV=2	N	GO:0044822
A0A024R2W4	DAG1_HUMANDystroglycan OS=Homo sapiens GN=DAG1 PE=1 SV=2	C	GO:0005604	basement membrane
A0A024R2W4	DAG1_HUMANDystroglycan OS=Homo sapiens GN=DAG1 PE=1 SV=2	C	GO:0005615	extracellular space
A0A024R2W4	DAG1_HUMANDystroglycan OS=Homo sapiens GN=DAG1 PE=1 SV=2	C	GO:0005654	nucleoplasm
A0A024R2W4	DAG1_HUMANDystroglycan OS=Homo sapiens GN=DAG1 PE=1 SV=2	C	GO:0005829	cytosol
A0A024R2W4	DAG1_HUMANDystroglycan OS=Homo sapiens GN=DAG1 PE=1 SV=2	C	GO:0005925	focal adhesion
A0A024R2W4	DAG1_HUMANDystroglycan OS=Homo sapiens GN=DAG1 PE=1 SV=2	C	GO:0016010	dystrophin-associated glycoprotein complex
A0A024R2W4	DAG1_HUMANDystroglycan OS=Homo sapiens GN=DAG1 PE=1 SV=2	C	GO:0016021	integral to membrane
A0A024R2W4	DAG1_HUMANDystroglycan OS=Homo sapiens GN=DAG1 PE=1 SV=2	C	GO:0030027	lamellipodium
A0A024R2W4	DAG1_HUMANDystroglycan OS=Homo sapiens GN=DAG1 PE=1 SV=2	C	GO:0030175	filopodium
A0A024R2W4	DAG1_HUMANDystroglycan OS=Homo sapiens GN=DAG1 PE=1 SV=2	C	GO:0070062	extracellular vesicular exosome
A0A024R2W4	DAG1_HUMANDystroglycan OS=Homo sapiens GN=DAG1 PE=1 SV=2	C	GO:0070938	contractile ring
A0A024R2W4	DAG1_HUMANDystroglycan OS=Homo sapiens GN=DAG1 PE=1 SV=2	F	GO:0003779	actin binding
A0A024R2W4	DAG1_HUMANDystroglycan OS=Homo sapiens GN=DAG1 PE=1 SV=2	F	GO:0005509	calcium ion binding
A0A024R2W4	DAG1_HUMANDystroglycan OS=Homo sapiens GN=DAG1 PE=1 SV=2	F	GO:0008307	structural constituent of muscle
A0A024R2W4	DAG1_HUMANDystroglycan OS=Homo sapiens GN=DAG1 PE=1 SV=2	F	GO:0015631	tubulin binding
A0A024R2W4	DAG1_HUMANDystroglycan OS=Homo sapiens GN=DAG1 PE=1 SV=2	F	GO:0017166	vinculin binding
A0A024R2W4	DAG1_HUMANDystroglycan OS=Homo sapiens GN=DAG1 PE=1 SV=2	F	GO:0042169	SH2 domain binding
A0A024R2W4	DAG1_HUMANDystroglycan OS=Homo sapiens GN=DAG1 PE=1 SV=2	F	GO:0051393	alpha-actinin binding
A0A024R2W4	DAG1_HUMANDystroglycan OS=Homo sapiens GN=DAG1 PE=1 SV=2	P	GO:0006493	protein O-linked glycosylation
A0A024R2W4	DAG1_HUMANDystroglycan OS=Homo sapiens GN=DAG1 PE=1 SV=2	P	GO:0006509	membrane protein ectodomain proteolysis
A0A024R2W4	DAG1_HUMANDystroglycan OS=Homo sapiens GN=DAG1 PE=1 SV=2	P	GO:0006607	NLS-bearing substrate import into nucleus
A0A024R2W4	DAG1_HUMANDystroglycan OS=Homo sapiens GN=DAG1 PE=1 SV=2	P	GO:0007016	cytoskeletal anchoring at plasma membrane
A0A024R2W4	DAG1_HUMANDystroglycan OS=Homo sapiens GN=DAG1 PE=1 SV=2	P	GO:0010470	regulation of gastrulation
A0A024R2W4	DAG1_HUMANDystroglycan OS=Homo sapiens GN=DAG1 PE=1 SV=2	P	GO:0010717	regulation of epithelial to mesenchymal transition
A0A024R2W4	DAG1_HUMANDystroglycan OS=Homo sapiens GN=DAG1 PE=1 SV=2	P	GO:0019048	modulation by virus of host morphology or physiology
A0A024R2W4	DAG1_HUMANDystroglycan OS=Homo sapiens GN=DAG1 PE=1 SV=2	P	GO:0030336	negative regulation of cell migration
A0A024R2W4	DAG1_HUMANDystroglycan OS=Homo sapiens GN=DAG1 PE=1 SV=2	P	GO:0034453	microtubule anchoring
A0A024R2W4	DAG1_HUMANDystroglycan OS=Homo sapiens GN=DAG1 PE=1 SV=2	P	GO:0043409	negative regulation of MAPK cascade
A0A024R2W4	DAG1_HUMANDystroglycan OS=Homo sapiens GN=DAG1 PE=1 SV=2	P	GO:0051898	negative regulation of protein kinase B signaling cascade
A0A024R2W4	DAG1_HUMANDystroglycan OS=Homo sapiens GN=DAG1 PE=1 SV=2	N	GO:1904261
A0A024R2W4	DAG1_HUMANDystroglycan OS=Homo sapiens GN=DAG1 PE=1 SV=2	C	GO:0045298	tubulin complex
K7EQL1	FA98C_HUMAN FAM98C OS=Homo sapiens GN=FAM98C PE=2 SV=1	C	GO:0044424	intracellular part
Q6QN92	GCSH_HUMANGlycine cleavage system H mitochondrial OS=Homo sapiens GN=GCSH PE=1 SV=2	C	GO:0005759	mitochondrial matrix
Q6QN92	GCSH_HUMANGlycine cleavage system H mitochondrial OS=Homo sapiens GN=GCSH PE=1 SV=2	C	GO:0005960	glycine cleavage complex
Q6QN92	GCSH_HUMANGlycine cleavage system H mitochondrial OS=Homo sapiens GN=GCSH PE=1 SV=2	F	GO:0004047	aminomethyltransferase activity
Q6QN92	GCSH_HUMANGlycine cleavage system H mitochondrial OS=Homo sapiens GN=GCSH PE=1 SV=2	P	GO:0019464	glycine decarboxylation via glycine cleavage system
Q6QN92	GCSH_HUMANGlycine cleavage system H mitochondrial OS=Homo sapiens GN=GCSH PE=1 SV=2	P	GO:0046487	glyoxylate metabolic process
Q6QN92	GCSH_HUMANGlycine cleavage system H mitochondrial OS=Homo sapiens GN=GCSH PE=1 SV=2	P	GO:0006563	L-serine metabolic process
Q6QN92	GCSH_HUMANGlycine cleavage system H mitochondrial OS=Homo sapiens GN=GCSH PE=1 SV=2	P	GO:0006566	threonine metabolic process
Q2M2H8	MGAL_HUMANProbable maltase-glucoamylase 2 OS=Homo sapiens GN=MGAM2 PE=2 SV=3	C	GO:0016020	membrane
Q2M2H8	MGAL_HUMANProbable maltase-glucoamylase 2 OS=Homo sapiens GN=MGAM2 PE=2 SV=3	C	GO:0043231	intracellular membrane-bounded organelle
Q2M2H8	MGAL_HUMANProbable maltase-glucoamylase 2 OS=Homo sapiens GN=MGAM2 PE=2 SV=3	C	GO:0044444	cytoplasmic part
Q2M2H8	MGAL_HUMANProbable maltase-glucoamylase 2 OS=Homo sapiens GN=MGAM2 PE=2 SV=3	F	GO:0030246	carbohydrate binding
Q2M2H8	MGAL_HUMANProbable maltase-glucoamylase 2 OS=Homo sapiens GN=MGAM2 PE=2 SV=3	N	GO:0090599
Q2M2H8	MGAL_HUMANProbable maltase-glucoamylase 2 OS=Homo sapiens GN=MGAM2 PE=2 SV=3	P	GO:0044262	cellular carbohydrate metabolic process
Q2M2H8	MGAL_HUMANProbable maltase-glucoamylase 2 OS=Homo sapiens GN=MGAM2 PE=2 SV=3	P	GO:0044707	single-multicellular organism process
Q2M2H8	MGAL_HUMANProbable maltase-glucoamylase 2 OS=Homo sapiens GN=MGAM2 PE=2 SV=3	P	GO:0044763	single-organism cellular process
B4DT46	CY24A_HUMANCytochrome b-245 light chain OS=Homo sapiens GN=CYBA PE=1 SV=3	C	GO:0005789	endoplasmic reticulum membrane
B4DT46	CY24A_HUMANCytochrome b-245 light chain OS=Homo sapiens GN=CYBA PE=1 SV=3	C	GO:0030141	secretory granule
B4DT46	CY24A_HUMANCytochrome b-245 light chain OS=Homo sapiens GN=CYBA PE=1 SV=3	C	GO:0030670	phagocytic vesicle membrane
B4DT46	CY24A_HUMANCytochrome b-245 light chain OS=Homo sapiens GN=CYBA PE=1 SV=3	C	GO:0043020	NADPH oxidase complex
B4DT46	CY24A_HUMANCytochrome b-245 light chain OS=Homo sapiens GN=CYBA PE=1 SV=3	F	GO:0009055	electron carrier activity
B4DT46	CY24A_HUMANCytochrome b-245 light chain OS=Homo sapiens GN=CYBA PE=1 SV=3	F	GO:0016175	superoxide-generating NADPH oxidase activity
B4DT46	CY24A_HUMANCytochrome b-245 light chain OS=Homo sapiens GN=CYBA PE=1 SV=3	F	GO:0017124	SH3 domain binding
B4DT46	CY24A_HUMANCytochrome b-245 light chain OS=Homo sapiens GN=CYBA PE=1 SV=3	F	GO:0020037	heme binding
B4DT46	CY24A_HUMANCytochrome b-245 light chain OS=Homo sapiens GN=CYBA PE=1 SV=3	F	GO:0046982	protein heterodimerization activity
B4DT46	CY24A_HUMANCytochrome b-245 light chain OS=Homo sapiens GN=CYBA PE=1 SV=3	P	GO:0000302	response to reactive oxygen species
B4DT46	CY24A_HUMANCytochrome b-245 light chain OS=Homo sapiens GN=CYBA PE=1 SV=3	P	GO:0002479	antigen processing and presentation of exogenous peptide antigen via MHC class I, TAP-dependent
B4DT46	CY24A_HUMANCytochrome b-245 light chain OS=Homo sapiens GN=CYBA PE=1 SV=3	P	GO:0003008	system process
B4DT46	CY24A_HUMANCytochrome b-245 light chain OS=Homo sapiens GN=CYBA PE=1 SV=3	P	GO:0006954	inflammatory response
B4DT46	CY24A_HUMANCytochrome b-245 light chain OS=Homo sapiens GN=CYBA PE=1 SV=3	P	GO:0017004	cytochrome complex assembly
B4DT46	CY24A_HUMANCytochrome b-245 light chain OS=Homo sapiens GN=CYBA PE=1 SV=3	P	GO:0032755	positive regulation of interleukin-6 production
B4DT46	CY24A_HUMANCytochrome b-245 light chain OS=Homo sapiens GN=CYBA PE=1 SV=3	P	GO:0032760	positive regulation of tumor necrosis factor production
B4DT46	CY24A_HUMANCytochrome b-245 light chain OS=Homo sapiens GN=CYBA PE=1 SV=3	P	GO:0034137	positive regulation of toll-like receptor 2 signaling pathway
B4DT46	CY24A_HUMANCytochrome b-245 light chain OS=Homo sapiens GN=CYBA PE=1 SV=3	P	GO:0042554	superoxide anion generation
B4DT46	CY24A_HUMANCytochrome b-245 light chain OS=Homo sapiens GN=CYBA PE=1 SV=3	P	GO:0045454	cell redox homeostasis
B4DT46	CY24A_HUMANCytochrome b-245 light chain OS=Homo sapiens GN=CYBA PE=1 SV=3	P	GO:0045730	respiratory burst
B4DT46	CY24A_HUMANCytochrome b-245 light chain OS=Homo sapiens GN=CYBA PE=1 SV=3	P	GO:0048010	vascular endothelial growth factor receptor signaling pathway
B4DT46	CY24A_HUMANCytochrome b-245 light chain OS=Homo sapiens GN=CYBA PE=1 SV=3	P	GO:0050766	positive regulation of phagocytosis
B4DT46	CY24A_HUMANCytochrome b-245 light chain OS=Homo sapiens GN=CYBA PE=1 SV=3	P	GO:0055114	oxidation-reduction process
B4DT46	CY24A_HUMANCytochrome b-245 light chain OS=Homo sapiens GN=CYBA PE=1 SV=3	P	GO:0071310	cellular response to organic substance
B4DT46	CY24A_HUMANCytochrome b-245 light chain OS=Homo sapiens GN=CYBA PE=1 SV=3	P	GO:1900426	positive regulation of defense response to bacterium
B4DT46	CY24A_HUMANCytochrome b-245 light chain OS=Homo sapiens GN=CYBA PE=1 SV=3	N	GO:1903428
B4DT46	CY24A_HUMANCytochrome b-245 light chain OS=Homo sapiens GN=CYBA PE=1 SV=3	P	GO:0006118	electron transport
Q5VV42	CDKAL_HUMANThreonylcarbamoyladenosine tRNA methylthiotransferase OS=Homo sapiens GN=CDKAL1 PE=1 SV=1	C	GO:0005789	endoplasmic reticulum membrane
Q5VV42	CDKAL_HUMANThreonylcarbamoyladenosine tRNA methylthiotransferase OS=Homo sapiens GN=CDKAL1 PE=1 SV=1	F	GO:0005515	protein binding
Q5VV42	CDKAL_HUMANThreonylcarbamoyladenosine tRNA methylthiotransferase OS=Homo sapiens GN=CDKAL1 PE=1 SV=1	F	GO:0035598	N6-threonylcarbomyladenosine methylthiotransferase activity
Q5VV42	CDKAL_HUMANThreonylcarbamoyladenosine tRNA methylthiotransferase OS=Homo sapiens GN=CDKAL1 PE=1 SV=1	F	GO:0051539	4 iron, 4 sulfur cluster binding
Q5VV42	CDKAL_HUMANThreonylcarbamoyladenosine tRNA methylthiotransferase OS=Homo sapiens GN=CDKAL1 PE=1 SV=1	P	GO:0006400	tRNA modification
E9PM82	ASCC1_HUMANActivating signal cointegrator 1 complex subunit 1 OS=Homo sapiens GN=ASCC1 PE=1 SV=1	C	GO:0044424	intracellular part
E9PM82	ASCC1_HUMANActivating signal cointegrator 1 complex subunit 1 OS=Homo sapiens GN=ASCC1 PE=1 SV=1	F	GO:0003723	RNA binding
Q9Y6A5	TACC3_HUMANTransforming acidic coiled-coil-containing 3 OS=Homo sapiens GN=TACC3 PE=1 SV=1	C	GO:0015630	microtubule cytoskeleton
Q9Y6A5	TACC3_HUMANTransforming acidic coiled-coil-containing 3 OS=Homo sapiens GN=TACC3 PE=1 SV=1	F	GO:0005515	protein binding
Q9Y6A5	TACC3_HUMANTransforming acidic coiled-coil-containing 3 OS=Homo sapiens GN=TACC3 PE=1 SV=1	P	GO:0044763	single-organism cellular process
Q9H5M4	KC1G1_HUMANCasein kinase I isoform gamma-1 OS=Homo sapiens GN=CSNK1G1 PE=1 SV=1	C	GO:0005794	Golgi apparatus
Q9H5M4	KC1G1_HUMANCasein kinase I isoform gamma-1 OS=Homo sapiens GN=CSNK1G1 PE=1 SV=1	C	GO:0005813	centrosome
Q9H5M4	KC1G1_HUMANCasein kinase I isoform gamma-1 OS=Homo sapiens GN=CSNK1G1 PE=1 SV=1	C	GO:0005819	spindle
Q9H5M4	KC1G1_HUMANCasein kinase I isoform gamma-1 OS=Homo sapiens GN=CSNK1G1 PE=1 SV=1	C	GO:0016020	membrane
Q9H5M4	KC1G1_HUMANCasein kinase I isoform gamma-1 OS=Homo sapiens GN=CSNK1G1 PE=1 SV=1	C	GO:0031981	nuclear lumen
Q9H5M4	KC1G1_HUMANCasein kinase I isoform gamma-1 OS=Homo sapiens GN=CSNK1G1 PE=1 SV=1	C	GO:0042995	cell projection
Q9H5M4	KC1G1_HUMANCasein kinase I isoform gamma-1 OS=Homo sapiens GN=CSNK1G1 PE=1 SV=1	C	GO:0043234	protein complex
Q9H5M4	KC1G1_HUMANCasein kinase I isoform gamma-1 OS=Homo sapiens GN=CSNK1G1 PE=1 SV=1	N	GO:0099513
Q9H5M4	KC1G1_HUMANCasein kinase I isoform gamma-1 OS=Homo sapiens GN=CSNK1G1 PE=1 SV=1	F	GO:0004674	protein serine/threonine kinase activity
Q9H5M4	KC1G1_HUMANCasein kinase I isoform gamma-1 OS=Homo sapiens GN=CSNK1G1 PE=1 SV=1	F	GO:0005515	protein binding
Q9H5M4	KC1G1_HUMANCasein kinase I isoform gamma-1 OS=Homo sapiens GN=CSNK1G1 PE=1 SV=1	F	GO:0005524	ATP binding
Q9H5M4	KC1G1_HUMANCasein kinase I isoform gamma-1 OS=Homo sapiens GN=CSNK1G1 PE=1 SV=1	P	GO:0000226	microtubule cytoskeleton organization
Q9H5M4	KC1G1_HUMANCasein kinase I isoform gamma-1 OS=Homo sapiens GN=CSNK1G1 PE=1 SV=1	P	GO:0006461	protein complex assembly
Q9H5M4	KC1G1_HUMANCasein kinase I isoform gamma-1 OS=Homo sapiens GN=CSNK1G1 PE=1 SV=1	P	GO:0006897	endocytosis
Q9H5M4	KC1G1_HUMANCasein kinase I isoform gamma-1 OS=Homo sapiens GN=CSNK1G1 PE=1 SV=1	P	GO:0007030	Golgi organization
Q9H5M4	KC1G1_HUMANCasein kinase I isoform gamma-1 OS=Homo sapiens GN=CSNK1G1 PE=1 SV=1	P	GO:0018105	peptidyl-serine phosphorylation
Q9H5M4	KC1G1_HUMANCasein kinase I isoform gamma-1 OS=Homo sapiens GN=CSNK1G1 PE=1 SV=1	P	GO:0030177	positive regulation of Wnt receptor signaling pathway
Q9H5M4	KC1G1_HUMANCasein kinase I isoform gamma-1 OS=Homo sapiens GN=CSNK1G1 PE=1 SV=1	P	GO:0032270	positive regulation of cellular protein metabolic process
Q9H5M4	KC1G1_HUMANCasein kinase I isoform gamma-1 OS=Homo sapiens GN=CSNK1G1 PE=1 SV=1	P	GO:0033365	protein localization to organelle
Q9H5M4	KC1G1_HUMANCasein kinase I isoform gamma-1 OS=Homo sapiens GN=CSNK1G1 PE=1 SV=1	P	GO:0042384	cilium assembly
Q9H5M4	KC1G1_HUMANCasein kinase I isoform gamma-1 OS=Homo sapiens GN=CSNK1G1 PE=1 SV=1	P	GO:0051098	regulation of binding
Q9H5M4	KC1G1_HUMANCasein kinase I isoform gamma-1 OS=Homo sapiens GN=CSNK1G1 PE=1 SV=1	P	GO:0060828	regulation of canonical Wnt receptor signaling pathway
Q9H5M4	KC1G1_HUMANCasein kinase I isoform gamma-1 OS=Homo sapiens GN=CSNK1G1 PE=1 SV=1	N	GO:1903047
Q9H5M4	KC1G1_HUMANCasein kinase I isoform gamma-1 OS=Homo sapiens GN=CSNK1G1 PE=1 SV=1	P	GO:0009069	serine family amino acid metabolic process
D3DR37	CEP55_HUMANCentrosomal of 55 kDa OS=Homo sapiens GN=CEP55 PE=1 SV=3	C	GO:0005813	centrosome
D3DR37	CEP55_HUMANCentrosomal of 55 kDa OS=Homo sapiens GN=CEP55 PE=1 SV=3	C	GO:0016020	membrane
D3DR37	CEP55_HUMANCentrosomal of 55 kDa OS=Homo sapiens GN=CEP55 PE=1 SV=3	C	GO:0030496	midbody
D3DR37	CEP55_HUMANCentrosomal of 55 kDa OS=Homo sapiens GN=CEP55 PE=1 SV=3	F	GO:0005515	protein binding
D3DR37	CEP55_HUMANCentrosomal of 55 kDa OS=Homo sapiens GN=CEP55 PE=1 SV=3	P	GO:0000281	mitotic cytokinesis
D3DR37	CEP55_HUMANCentrosomal of 55 kDa OS=Homo sapiens GN=CEP55 PE=1 SV=3	P	GO:0000920	cytokinetic cell separation
D3DR37	CEP55_HUMANCentrosomal of 55 kDa OS=Homo sapiens GN=CEP55 PE=1 SV=3	P	GO:0006997	nucleus organization
D3DR37	CEP55_HUMANCentrosomal of 55 kDa OS=Homo sapiens GN=CEP55 PE=1 SV=3	P	GO:0007080	mitotic metaphase plate congression
D3DR37	CEP55_HUMANCentrosomal of 55 kDa OS=Homo sapiens GN=CEP55 PE=1 SV=3	P	GO:0045184	establishment of protein localization
Q8IY37	DHX37_HUMANProbable ATP-dependent RNA helicase DHX37 OS=Homo sapiens GN=DHX37 PE=1 SV=1	C	GO:0005654	nucleoplasm
Q8IY37	DHX37_HUMANProbable ATP-dependent RNA helicase DHX37 OS=Homo sapiens GN=DHX37 PE=1 SV=1	C	GO:0005737	cytoplasm
Q8IY37	DHX37_HUMANProbable ATP-dependent RNA helicase DHX37 OS=Homo sapiens GN=DHX37 PE=1 SV=1	C	GO:0043232	intracellular non-membrane-bounded organelle
Q8IY37	DHX37_HUMANProbable ATP-dependent RNA helicase DHX37 OS=Homo sapiens GN=DHX37 PE=1 SV=1	F	GO:0003723	RNA binding
Q8IY37	DHX37_HUMANProbable ATP-dependent RNA helicase DHX37 OS=Homo sapiens GN=DHX37 PE=1 SV=1	F	GO:0003724	RNA helicase activity
Q8IY37	DHX37_HUMANProbable ATP-dependent RNA helicase DHX37 OS=Homo sapiens GN=DHX37 PE=1 SV=1	F	GO:0005524	ATP binding
Q8IY37	DHX37_HUMANProbable ATP-dependent RNA helicase DHX37 OS=Homo sapiens GN=DHX37 PE=1 SV=1	F	GO:0008026	ATP-dependent helicase activity
Q8IY37	DHX37_HUMANProbable ATP-dependent RNA helicase DHX37 OS=Homo sapiens GN=DHX37 PE=1 SV=1	P	GO:0006364	rRNA processing
Q96EX3	WDR34_HUMANWD repeat-containing 34 OS=Homo sapiens GN=WDR34 PE=1 SV=2	C	GO:0005813	centrosome
Q96EX3	WDR34_HUMANWD repeat-containing 34 OS=Homo sapiens GN=WDR34 PE=1 SV=2	C	GO:0005930	axoneme
Q96EX3	WDR34_HUMANWD repeat-containing 34 OS=Homo sapiens GN=WDR34 PE=1 SV=2	C	GO:0032991	macromolecular complex
Q96EX3	WDR34_HUMANWD repeat-containing 34 OS=Homo sapiens GN=WDR34 PE=1 SV=2	C	GO:0044444	cytoplasmic part
Q96EX3	WDR34_HUMANWD repeat-containing 34 OS=Homo sapiens GN=WDR34 PE=1 SV=2	C	GO:0072372	primary cilium
Q96EX3	WDR34_HUMANWD repeat-containing 34 OS=Homo sapiens GN=WDR34 PE=1 SV=2	N	GO:0097542
Q96EX3	WDR34_HUMANWD repeat-containing 34 OS=Homo sapiens GN=WDR34 PE=1 SV=2	F	GO:0005515	protein binding
Q96EX3	WDR34_HUMANWD repeat-containing 34 OS=Homo sapiens GN=WDR34 PE=1 SV=2	P	GO:0044763	single-organism cellular process
Q96EX3	WDR34_HUMANWD repeat-containing 34 OS=Homo sapiens GN=WDR34 PE=1 SV=2	P	GO:0050789	regulation of biological process
Q03169	TNAP2_HUMANTumor necrosis factor alpha-induced 2 OS=Homo sapiens GN=TNFAIP2 PE=2 SV=2	C	GO:0000145	exocyst
Q03169	TNAP2_HUMANTumor necrosis factor alpha-induced 2 OS=Homo sapiens GN=TNFAIP2 PE=2 SV=2	C	GO:0005615	extracellular space
Q03169	TNAP2_HUMANTumor necrosis factor alpha-induced 2 OS=Homo sapiens GN=TNFAIP2 PE=2 SV=2	F	GO:0005515	protein binding
Q03169	TNAP2_HUMANTumor necrosis factor alpha-induced 2 OS=Homo sapiens GN=TNFAIP2 PE=2 SV=2	P	GO:0006887	exocytosis
Q03169	TNAP2_HUMANTumor necrosis factor alpha-induced 2 OS=Homo sapiens GN=TNFAIP2 PE=2 SV=2	P	GO:0008104	protein localization
O75911	DHRS3_HUMANShort-chain dehydrogenase reductase 3 OS=Homo sapiens GN=DHRS3 PE=1 SV=2	C	GO:0005789	endoplasmic reticulum membrane
O75911	DHRS3_HUMANShort-chain dehydrogenase reductase 3 OS=Homo sapiens GN=DHRS3 PE=1 SV=2	C	GO:0042622	photoreceptor outer segment membrane
O75911	DHRS3_HUMANShort-chain dehydrogenase reductase 3 OS=Homo sapiens GN=DHRS3 PE=1 SV=2	F	GO:0000166	nucleotide binding
O75911	DHRS3_HUMANShort-chain dehydrogenase reductase 3 OS=Homo sapiens GN=DHRS3 PE=1 SV=2	F	GO:0004745	retinol dehydrogenase activity
O75911	DHRS3_HUMANShort-chain dehydrogenase reductase 3 OS=Homo sapiens GN=DHRS3 PE=1 SV=2	F	GO:0009055	electron carrier activity
O75911	DHRS3_HUMANShort-chain dehydrogenase reductase 3 OS=Homo sapiens GN=DHRS3 PE=1 SV=2	F	GO:0052650	NADP-retinol dehydrogenase activity
O75911	DHRS3_HUMANShort-chain dehydrogenase reductase 3 OS=Homo sapiens GN=DHRS3 PE=1 SV=2	P	GO:0007601	visual perception
O75911	DHRS3_HUMANShort-chain dehydrogenase reductase 3 OS=Homo sapiens GN=DHRS3 PE=1 SV=2	P	GO:0009887	organ morphogenesis
O75911	DHRS3_HUMANShort-chain dehydrogenase reductase 3 OS=Homo sapiens GN=DHRS3 PE=1 SV=2	P	GO:0042572	retinol metabolic process
O75911	DHRS3_HUMANShort-chain dehydrogenase reductase 3 OS=Homo sapiens GN=DHRS3 PE=1 SV=2	P	GO:0050789	regulation of biological process
O75911	DHRS3_HUMANShort-chain dehydrogenase reductase 3 OS=Homo sapiens GN=DHRS3 PE=1 SV=2	P	GO:0006118	electron transport
A0A140VJE0	ADK_HUMANAdenosine kinase OS=Homo sapiens GN=ADK PE=1 SV=2	C	GO:0005654	nucleoplasm
A0A140VJE0	ADK_HUMANAdenosine kinase OS=Homo sapiens GN=ADK PE=1 SV=2	C	GO:0005829	cytosol
A0A140VJE0	ADK_HUMANAdenosine kinase OS=Homo sapiens GN=ADK PE=1 SV=2	F	GO:0004001	adenosine kinase activity
A0A140VJE0	ADK_HUMANAdenosine kinase OS=Homo sapiens GN=ADK PE=1 SV=2	N	GO:0044822
A0A140VJE0	ADK_HUMANAdenosine kinase OS=Homo sapiens GN=ADK PE=1 SV=2	P	GO:0006166	purine ribonucleoside salvage
A0A140VJE0	ADK_HUMANAdenosine kinase OS=Homo sapiens GN=ADK PE=1 SV=2	P	GO:0009156	ribonucleoside monophosphate biosynthetic process
A0A140VJE0	ADK_HUMANAdenosine kinase OS=Homo sapiens GN=ADK PE=1 SV=2	P	GO:0006144	purine nucleobase metabolic process
H0UI22	SYRM_HUMANProbable arginine--tRNA mitochondrial OS=Homo sapiens GN=RARS2 PE=1 SV=1	C	GO:0005759	mitochondrial matrix
H0UI22	SYRM_HUMANProbable arginine--tRNA mitochondrial OS=Homo sapiens GN=RARS2 PE=1 SV=1	F	GO:0004814	arginine-tRNA ligase activity
H0UI22	SYRM_HUMANProbable arginine--tRNA mitochondrial OS=Homo sapiens GN=RARS2 PE=1 SV=1	F	GO:0005524	ATP binding
H0UI22	SYRM_HUMANProbable arginine--tRNA mitochondrial OS=Homo sapiens GN=RARS2 PE=1 SV=1	N	GO:0044822
H0UI22	SYRM_HUMANProbable arginine--tRNA mitochondrial OS=Homo sapiens GN=RARS2 PE=1 SV=1	P	GO:0006420	arginyl-tRNA aminoacylation
H0UI22	SYRM_HUMANProbable arginine--tRNA mitochondrial OS=Homo sapiens GN=RARS2 PE=1 SV=1	P	GO:0006525	arginine metabolic process
H0UI22	SYRM_HUMANProbable arginine--tRNA mitochondrial OS=Homo sapiens GN=RARS2 PE=1 SV=1	P	GO:0006560	proline metabolic process
A8KAQ3	SORT_HUMANSortilin OS=Homo sapiens GN=SORT1 PE=1 SV=3	C	GO:0005769	early endosome
A8KAQ3	SORT_HUMANSortilin OS=Homo sapiens GN=SORT1 PE=1 SV=3	C	GO:0005794	Golgi apparatus
A8KAQ3	SORT_HUMANSortilin OS=Homo sapiens GN=SORT1 PE=1 SV=3	C	GO:0005886	plasma membrane
A8KAQ3	SORT_HUMANSortilin OS=Homo sapiens GN=SORT1 PE=1 SV=3	C	GO:0005905	coated pit
A8KAQ3	SORT_HUMANSortilin OS=Homo sapiens GN=SORT1 PE=1 SV=3	C	GO:0009986	cell surface
A8KAQ3	SORT_HUMANSortilin OS=Homo sapiens GN=SORT1 PE=1 SV=3	C	GO:0016021	integral to membrane
A8KAQ3	SORT_HUMANSortilin OS=Homo sapiens GN=SORT1 PE=1 SV=3	C	GO:0030136	clathrin-coated vesicle
A8KAQ3	SORT_HUMANSortilin OS=Homo sapiens GN=SORT1 PE=1 SV=3	C	GO:0044446	intracellular organelle part
A8KAQ3	SORT_HUMANSortilin OS=Homo sapiens GN=SORT1 PE=1 SV=3	C	GO:0048471	perinuclear region of cytoplasm
A8KAQ3	SORT_HUMANSortilin OS=Homo sapiens GN=SORT1 PE=1 SV=3	F	GO:0010465	nerve growth factor receptor activity
A8KAQ3	SORT_HUMANSortilin OS=Homo sapiens GN=SORT1 PE=1 SV=3	F	GO:0019899	enzyme binding
A8KAQ3	SORT_HUMANSortilin OS=Homo sapiens GN=SORT1 PE=1 SV=3	F	GO:0030379	neurotensin receptor activity, non-G-protein coupled
A8KAQ3	SORT_HUMANSortilin OS=Homo sapiens GN=SORT1 PE=1 SV=3	F	GO:0048406	nerve growth factor binding
A8KAQ3	SORT_HUMANSortilin OS=Homo sapiens GN=SORT1 PE=1 SV=3	P	GO:0006895	Golgi to endosome transport
A8KAQ3	SORT_HUMANSortilin OS=Homo sapiens GN=SORT1 PE=1 SV=3	P	GO:0006897	endocytosis
A8KAQ3	SORT_HUMANSortilin OS=Homo sapiens GN=SORT1 PE=1 SV=3	P	GO:0007218	neuropeptide signaling pathway
A8KAQ3	SORT_HUMANSortilin OS=Homo sapiens GN=SORT1 PE=1 SV=3	P	GO:0008333	endosome to lysosome transport
A8KAQ3	SORT_HUMANSortilin OS=Homo sapiens GN=SORT1 PE=1 SV=3	P	GO:0008625	extrinsic apoptotic signaling pathway via death domain receptors
A8KAQ3	SORT_HUMANSortilin OS=Homo sapiens GN=SORT1 PE=1 SV=3	P	GO:0010468	regulation of gene expression
A8KAQ3	SORT_HUMANSortilin OS=Homo sapiens GN=SORT1 PE=1 SV=3	P	GO:0014902	myotube differentiation
A8KAQ3	SORT_HUMANSortilin OS=Homo sapiens GN=SORT1 PE=1 SV=3	P	GO:0016050	vesicle organization
A8KAQ3	SORT_HUMANSortilin OS=Homo sapiens GN=SORT1 PE=1 SV=3	P	GO:0032509	endosome transport via multivesicular body sorting pathway
A8KAQ3	SORT_HUMANSortilin OS=Homo sapiens GN=SORT1 PE=1 SV=3	P	GO:0032868	response to insulin stimulus
A8KAQ3	SORT_HUMANSortilin OS=Homo sapiens GN=SORT1 PE=1 SV=3	P	GO:0044707	single-multicellular organism process
A8KAQ3	SORT_HUMANSortilin OS=Homo sapiens GN=SORT1 PE=1 SV=3	P	GO:0046323	glucose import
A8KAQ3	SORT_HUMANSortilin OS=Homo sapiens GN=SORT1 PE=1 SV=3	P	GO:0048011	neurotrophin TRK receptor signaling pathway
A8KAQ3	SORT_HUMANSortilin OS=Homo sapiens GN=SORT1 PE=1 SV=3	P	GO:0048227	plasma membrane to endosome transport
A8KAQ3	SORT_HUMANSortilin OS=Homo sapiens GN=SORT1 PE=1 SV=3	P	GO:0048518	positive regulation of biological process
A8KAQ3	SORT_HUMANSortilin OS=Homo sapiens GN=SORT1 PE=1 SV=3	P	GO:0048523	negative regulation of cellular process
A8KAQ3	SORT_HUMANSortilin OS=Homo sapiens GN=SORT1 PE=1 SV=3	P	GO:0051005	negative regulation of lipoprotein lipase activity
A0A0A0MTB0	SERC5_HUMANSerine incorporator 5 OS=Homo sapiens GN=SERINC5 PE=2 SV=1	C	GO:0005886	plasma membrane
A0A0A0MTB0	SERC5_HUMANSerine incorporator 5 OS=Homo sapiens GN=SERINC5 PE=2 SV=1	C	GO:0044444	cytoplasmic part
A0A0A0MTB0	SERC5_HUMANSerine incorporator 5 OS=Homo sapiens GN=SERINC5 PE=2 SV=1	C	GO:0070062	extracellular vesicular exosome
A0A0A0MTB0	SERC5_HUMANSerine incorporator 5 OS=Homo sapiens GN=SERINC5 PE=2 SV=1	F	GO:0015194	L-serine transmembrane transporter activity
A0A0A0MTB0	SERC5_HUMANSerine incorporator 5 OS=Homo sapiens GN=SERINC5 PE=2 SV=1	P	GO:0006658	phosphatidylserine metabolic process
A0A0A0MTB0	SERC5_HUMANSerine incorporator 5 OS=Homo sapiens GN=SERINC5 PE=2 SV=1	P	GO:0006665	sphingolipid metabolic process
A0A0A0MTB0	SERC5_HUMANSerine incorporator 5 OS=Homo sapiens GN=SERINC5 PE=2 SV=1	P	GO:0009597	detection of virus
A0A0A0MTB0	SERC5_HUMANSerine incorporator 5 OS=Homo sapiens GN=SERINC5 PE=2 SV=1	P	GO:0015825	L-serine transport
A0A0A0MTB0	SERC5_HUMANSerine incorporator 5 OS=Homo sapiens GN=SERINC5 PE=2 SV=1	P	GO:0042552	myelination
A0A0A0MTB0	SERC5_HUMANSerine incorporator 5 OS=Homo sapiens GN=SERINC5 PE=2 SV=1	P	GO:0045087	innate immune response
A0A0A0MTB0	SERC5_HUMANSerine incorporator 5 OS=Homo sapiens GN=SERINC5 PE=2 SV=1	P	GO:0051607	defense response to virus
A0A0A0MTB0	SERC5_HUMANSerine incorporator 5 OS=Homo sapiens GN=SERINC5 PE=2 SV=1	P	GO:0065007	biological regulation
P08582	TRFM_HUMANMelanotransferrin OS=Homo sapiens GN=MELTF PE=1 SV=2	C	GO:0005615	extracellular space
P08582	TRFM_HUMANMelanotransferrin OS=Homo sapiens GN=MELTF PE=1 SV=2	C	GO:0005887	integral to plasma membrane
P08582	TRFM_HUMANMelanotransferrin OS=Homo sapiens GN=MELTF PE=1 SV=2	C	GO:0009986	cell surface
P08582	TRFM_HUMANMelanotransferrin OS=Homo sapiens GN=MELTF PE=1 SV=2	C	GO:0012505	endomembrane system
P08582	TRFM_HUMANMelanotransferrin OS=Homo sapiens GN=MELTF PE=1 SV=2	C	GO:0043231	intracellular membrane-bounded organelle
P08582	TRFM_HUMANMelanotransferrin OS=Homo sapiens GN=MELTF PE=1 SV=2	C	GO:0044444	cytoplasmic part
P08582	TRFM_HUMANMelanotransferrin OS=Homo sapiens GN=MELTF PE=1 SV=2	C	GO:0046658	anchored to plasma membrane
P08582	TRFM_HUMANMelanotransferrin OS=Homo sapiens GN=MELTF PE=1 SV=2	C	GO:0070062	extracellular vesicular exosome
P08582	TRFM_HUMANMelanotransferrin OS=Homo sapiens GN=MELTF PE=1 SV=2	F	GO:0005506	iron ion binding
P08582	TRFM_HUMANMelanotransferrin OS=Homo sapiens GN=MELTF PE=1 SV=2	F	GO:0005515	protein binding
P08582	TRFM_HUMANMelanotransferrin OS=Homo sapiens GN=MELTF PE=1 SV=2	P	GO:0001558	regulation of cell growth
P08582	TRFM_HUMANMelanotransferrin OS=Homo sapiens GN=MELTF PE=1 SV=2	P	GO:0010756	positive regulation of plasminogen activation
P08582	TRFM_HUMANMelanotransferrin OS=Homo sapiens GN=MELTF PE=1 SV=2	P	GO:0042127	regulation of cell proliferation
P08582	TRFM_HUMANMelanotransferrin OS=Homo sapiens GN=MELTF PE=1 SV=2	P	GO:0042592	homeostatic process
P08582	TRFM_HUMANMelanotransferrin OS=Homo sapiens GN=MELTF PE=1 SV=2	P	GO:0090091	positive regulation of extracellular matrix disassembly
P08582	TRFM_HUMANMelanotransferrin OS=Homo sapiens GN=MELTF PE=1 SV=2	P	GO:0097286	iron ion import
P08582	TRFM_HUMANMelanotransferrin OS=Homo sapiens GN=MELTF PE=1 SV=2	P	GO:1900025	negative regulation of substrate adhesion-dependent cell spreading
Q12872	SFSWA_HUMANSplicing suppressor of white-apricot homolog OS=Homo sapiens GN=SFSWAP PE=1 SV=3	C	GO:0005634	nucleus
Q12872	SFSWA_HUMANSplicing suppressor of white-apricot homolog OS=Homo sapiens GN=SFSWAP PE=1 SV=3	F	GO:0003723	RNA binding
Q12872	SFSWA_HUMANSplicing suppressor of white-apricot homolog OS=Homo sapiens GN=SFSWAP PE=1 SV=3	F	GO:0005515	protein binding
Q12872	SFSWA_HUMANSplicing suppressor of white-apricot homolog OS=Homo sapiens GN=SFSWAP PE=1 SV=3	P	GO:0006376	mRNA splice site selection
Q12872	SFSWA_HUMANSplicing suppressor of white-apricot homolog OS=Homo sapiens GN=SFSWAP PE=1 SV=3	P	GO:0048024	regulation of mRNA splicing, via spliceosome
A0A087X1T2	SRBP2_HUMANSterol regulatory element-binding 2 OS=Homo sapiens GN=SREBF2 PE=1 SV=2	C	GO:0000139	Golgi membrane
A0A087X1T2	SRBP2_HUMANSterol regulatory element-binding 2 OS=Homo sapiens GN=SREBF2 PE=1 SV=2	C	GO:0005654	nucleoplasm
A0A087X1T2	SRBP2_HUMANSterol regulatory element-binding 2 OS=Homo sapiens GN=SREBF2 PE=1 SV=2	C	GO:0005829	cytosol
A0A087X1T2	SRBP2_HUMANSterol regulatory element-binding 2 OS=Homo sapiens GN=SREBF2 PE=1 SV=2	C	GO:0032937	SREBP-SCAP-Insig complex
A0A087X1T2	SRBP2_HUMANSterol regulatory element-binding 2 OS=Homo sapiens GN=SREBF2 PE=1 SV=2	F	GO:0000247	C-8 sterol isomerase activity
A0A087X1T2	SRBP2_HUMANSterol regulatory element-binding 2 OS=Homo sapiens GN=SREBF2 PE=1 SV=2	F	GO:0000978	RNA polymerase II core promoter proximal region sequence-specific DNA binding
A0A087X1T2	SRBP2_HUMANSterol regulatory element-binding 2 OS=Homo sapiens GN=SREBF2 PE=1 SV=2	F	GO:0001078	RNA polymerase II core promoter proximal region sequence-specific DNA binding transcription factor activity involved in negative regulation of transcription
A0A087X1T2	SRBP2_HUMANSterol regulatory element-binding 2 OS=Homo sapiens GN=SREBF2 PE=1 SV=2	F	GO:0008022	protein C-terminus binding
A0A087X1T2	SRBP2_HUMANSterol regulatory element-binding 2 OS=Homo sapiens GN=SREBF2 PE=1 SV=2	F	GO:0046983	protein dimerization activity
A0A087X1T2	SRBP2_HUMANSterol regulatory element-binding 2 OS=Homo sapiens GN=SREBF2 PE=1 SV=2	F	GO:0070888	E-box binding
A0A087X1T2	SRBP2_HUMANSterol regulatory element-binding 2 OS=Homo sapiens GN=SREBF2 PE=1 SV=2	P	GO:0006629	lipid metabolic process
A0A087X1T2	SRBP2_HUMANSterol regulatory element-binding 2 OS=Homo sapiens GN=SREBF2 PE=1 SV=2	P	GO:0007275	multicellular organismal development
A0A087X1T2	SRBP2_HUMANSterol regulatory element-binding 2 OS=Homo sapiens GN=SREBF2 PE=1 SV=2	P	GO:0009267	cellular response to starvation
A0A087X1T2	SRBP2_HUMANSterol regulatory element-binding 2 OS=Homo sapiens GN=SREBF2 PE=1 SV=2	P	GO:0010886	positive regulation of cholesterol storage
A0A087X1T2	SRBP2_HUMANSterol regulatory element-binding 2 OS=Homo sapiens GN=SREBF2 PE=1 SV=2	P	GO:0045944	positive regulation of transcription from RNA polymerase II promoter
A0A087X1T2	SRBP2_HUMANSterol regulatory element-binding 2 OS=Homo sapiens GN=SREBF2 PE=1 SV=2	P	GO:0055098	response to low-density lipoprotein particle stimulus
A0A087X1T2	SRBP2_HUMANSterol regulatory element-binding 2 OS=Homo sapiens GN=SREBF2 PE=1 SV=2	P	GO:0072368	regulation of lipid transport by negative regulation of transcription from RNA polymerase II promoter
A0A087X1T2	SRBP2_HUMANSterol regulatory element-binding 2 OS=Homo sapiens GN=SREBF2 PE=1 SV=2	P	GO:0090370	negative regulation of cholesterol efflux
A0A087X1T2	SRBP2_HUMANSterol regulatory element-binding 2 OS=Homo sapiens GN=SREBF2 PE=1 SV=2	P	GO:1901700	response to oxygen-containing compound
A0A087X1T2	SRBP2_HUMANSterol regulatory element-binding 2 OS=Homo sapiens GN=SREBF2 PE=1 SV=2	N	GO:1903146
A0A087X1T2	SRBP2_HUMANSterol regulatory element-binding 2 OS=Homo sapiens GN=SREBF2 PE=1 SV=2	N	GO:1903955
D6RIZ4	MFS10_HUMANMajor facilitator superfamily domain-containing 10 OS=Homo sapiens GN=MFSD10 PE=1 SV=1	C	GO:0016021	integral to membrane
D6RIZ4	MFS10_HUMANMajor facilitator superfamily domain-containing 10 OS=Homo sapiens GN=MFSD10 PE=1 SV=1	C	GO:0030659	cytoplasmic vesicle membrane
D6RIZ4	MFS10_HUMANMajor facilitator superfamily domain-containing 10 OS=Homo sapiens GN=MFSD10 PE=1 SV=1	F	GO:0008493	tetracycline transporter activity
D6RIZ4	MFS10_HUMANMajor facilitator superfamily domain-containing 10 OS=Homo sapiens GN=MFSD10 PE=1 SV=1	F	GO:0008514	organic anion transmembrane transporter activity
D6RIZ4	MFS10_HUMANMajor facilitator superfamily domain-containing 10 OS=Homo sapiens GN=MFSD10 PE=1 SV=1	P	GO:0043252	sodium-independent organic anion transport
D6RIZ4	MFS10_HUMANMajor facilitator superfamily domain-containing 10 OS=Homo sapiens GN=MFSD10 PE=1 SV=1	P	GO:0055085	transmembrane transport
D6RIZ4	MFS10_HUMANMajor facilitator superfamily domain-containing 10 OS=Homo sapiens GN=MFSD10 PE=1 SV=1	P	GO:0015904	tetracycline transport
Q14517	FAT1_HUMANProtocadherin Fat 1 OS=Homo sapiens GN=FAT1 PE=1 SV=2	C	GO:0005634	nucleus
Q14517	FAT1_HUMANProtocadherin Fat 1 OS=Homo sapiens GN=FAT1 PE=1 SV=2	C	GO:0005887	integral to plasma membrane
Q14517	FAT1_HUMANProtocadherin Fat 1 OS=Homo sapiens GN=FAT1 PE=1 SV=2	C	GO:0005911	cell-cell junction
Q14517	FAT1_HUMANProtocadherin Fat 1 OS=Homo sapiens GN=FAT1 PE=1 SV=2	C	GO:0005925	focal adhesion
Q14517	FAT1_HUMANProtocadherin Fat 1 OS=Homo sapiens GN=FAT1 PE=1 SV=2	C	GO:0048471	perinuclear region of cytoplasm
Q14517	FAT1_HUMANProtocadherin Fat 1 OS=Homo sapiens GN=FAT1 PE=1 SV=2	C	GO:0070062	extracellular vesicular exosome
Q14517	FAT1_HUMANProtocadherin Fat 1 OS=Homo sapiens GN=FAT1 PE=1 SV=2	F	GO:0005509	calcium ion binding
Q14517	FAT1_HUMANProtocadherin Fat 1 OS=Homo sapiens GN=FAT1 PE=1 SV=2	F	GO:0005515	protein binding
Q14517	FAT1_HUMANProtocadherin Fat 1 OS=Homo sapiens GN=FAT1 PE=1 SV=2	P	GO:0007156	homophilic cell adhesion
Q14517	FAT1_HUMANProtocadherin Fat 1 OS=Homo sapiens GN=FAT1 PE=1 SV=2	P	GO:0007267	cell-cell signaling
Q14517	FAT1_HUMANProtocadherin Fat 1 OS=Homo sapiens GN=FAT1 PE=1 SV=2	P	GO:0007399	nervous system development
Q14517	FAT1_HUMANProtocadherin Fat 1 OS=Homo sapiens GN=FAT1 PE=1 SV=2	P	GO:0016477	cell migration
Q14517	FAT1_HUMANProtocadherin Fat 1 OS=Homo sapiens GN=FAT1 PE=1 SV=2	P	GO:0048513	organ development
Q14517	FAT1_HUMANProtocadherin Fat 1 OS=Homo sapiens GN=FAT1 PE=1 SV=2	P	GO:0048729	tissue morphogenesis
Q14517	FAT1_HUMANProtocadherin Fat 1 OS=Homo sapiens GN=FAT1 PE=1 SV=2	P	GO:0050794	regulation of cellular process
Q14517	FAT1_HUMANProtocadherin Fat 1 OS=Homo sapiens GN=FAT1 PE=1 SV=2	P	GO:0050896	response to stimulus
Q14517	FAT1_HUMANProtocadherin Fat 1 OS=Homo sapiens GN=FAT1 PE=1 SV=2	P	GO:0060429	epithelium development
Q14517	FAT1_HUMANProtocadherin Fat 1 OS=Homo sapiens GN=FAT1 PE=1 SV=2	N	GO:1902589
O00767	ACOD_HUMANAcyl- desaturase OS=Homo sapiens GN=SCD PE=1 SV=2	C	GO:0005789	endoplasmic reticulum membrane
O00767	ACOD_HUMANAcyl- desaturase OS=Homo sapiens GN=SCD PE=1 SV=2	C	GO:0016021	integral to membrane
O00767	ACOD_HUMANAcyl- desaturase OS=Homo sapiens GN=SCD PE=1 SV=2	F	GO:0004768	stearoyl-CoA 9-desaturase activity
O00767	ACOD_HUMANAcyl- desaturase OS=Homo sapiens GN=SCD PE=1 SV=2	F	GO:0005506	iron ion binding
O00767	ACOD_HUMANAcyl- desaturase OS=Homo sapiens GN=SCD PE=1 SV=2	P	GO:0006636	unsaturated fatty acid biosynthetic process
O00767	ACOD_HUMANAcyl- desaturase OS=Homo sapiens GN=SCD PE=1 SV=2	P	GO:0035338	long-chain fatty-acyl-CoA biosynthetic process
O00767	ACOD_HUMANAcyl- desaturase OS=Homo sapiens GN=SCD PE=1 SV=2	P	GO:0055114	oxidation-reduction process
P53609	PGTB1_HUMANGeranylgeranyl transferase type-1 subunit beta OS=Homo sapiens GN=PGGT1B PE=1 SV=2	C	GO:0005953	CAAX-protein geranylgeranyltransferase complex
P53609	PGTB1_HUMANGeranylgeranyl transferase type-1 subunit beta OS=Homo sapiens GN=PGGT1B PE=1 SV=2	F	GO:0004662	CAAX-protein geranylgeranyltransferase activity
P53609	PGTB1_HUMANGeranylgeranyl transferase type-1 subunit beta OS=Homo sapiens GN=PGGT1B PE=1 SV=2	F	GO:0046872	metal ion binding
P53609	PGTB1_HUMANGeranylgeranyl transferase type-1 subunit beta OS=Homo sapiens GN=PGGT1B PE=1 SV=2	P	GO:0018344	protein geranylgeranylation
P53609	PGTB1_HUMANGeranylgeranyl transferase type-1 subunit beta OS=Homo sapiens GN=PGGT1B PE=1 SV=2	P	GO:0042127	regulation of cell proliferation
P53609	PGTB1_HUMANGeranylgeranyl transferase type-1 subunit beta OS=Homo sapiens GN=PGGT1B PE=1 SV=2	P	GO:0048518	positive regulation of biological process
P53609	PGTB1_HUMANGeranylgeranyl transferase type-1 subunit beta OS=Homo sapiens GN=PGGT1B PE=1 SV=2	P	GO:0050896	response to stimulus
P53609	PGTB1_HUMANGeranylgeranyl transferase type-1 subunit beta OS=Homo sapiens GN=PGGT1B PE=1 SV=2	P	GO:0018346	protein prenylation
P52735	VAV2_HUMANGuanine nucleotide exchange factor VAV2 OS=Homo sapiens GN=VAV2 PE=1 SV=2	C	GO:0005829	cytosol
P52735	VAV2_HUMANGuanine nucleotide exchange factor VAV2 OS=Homo sapiens GN=VAV2 PE=1 SV=2	F	GO:0005089	Rho guanyl-nucleotide exchange factor activity
P52735	VAV2_HUMANGuanine nucleotide exchange factor VAV2 OS=Homo sapiens GN=VAV2 PE=1 SV=2	F	GO:0005515	protein binding
P52735	VAV2_HUMANGuanine nucleotide exchange factor VAV2 OS=Homo sapiens GN=VAV2 PE=1 SV=2	P	GO:0008361	regulation of cell size
P52735	VAV2_HUMANGuanine nucleotide exchange factor VAV2 OS=Homo sapiens GN=VAV2 PE=1 SV=2	P	GO:0010468	regulation of gene expression
P52735	VAV2_HUMANGuanine nucleotide exchange factor VAV2 OS=Homo sapiens GN=VAV2 PE=1 SV=2	P	GO:0022607	cellular component assembly
P52735	VAV2_HUMANGuanine nucleotide exchange factor VAV2 OS=Homo sapiens GN=VAV2 PE=1 SV=2	P	GO:0030030	cell projection organization
P52735	VAV2_HUMANGuanine nucleotide exchange factor VAV2 OS=Homo sapiens GN=VAV2 PE=1 SV=2	P	GO:0030168	platelet activation
P52735	VAV2_HUMANGuanine nucleotide exchange factor VAV2 OS=Homo sapiens GN=VAV2 PE=1 SV=2	P	GO:0030193	regulation of blood coagulation
P52735	VAV2_HUMANGuanine nucleotide exchange factor VAV2 OS=Homo sapiens GN=VAV2 PE=1 SV=2	P	GO:0035023	regulation of Rho protein signal transduction
P52735	VAV2_HUMANGuanine nucleotide exchange factor VAV2 OS=Homo sapiens GN=VAV2 PE=1 SV=2	P	GO:0038095	Fc-epsilon receptor signaling pathway
P52735	VAV2_HUMANGuanine nucleotide exchange factor VAV2 OS=Homo sapiens GN=VAV2 PE=1 SV=2	P	GO:0038096	Fc-gamma receptor signaling pathway involved in phagocytosis
P52735	VAV2_HUMANGuanine nucleotide exchange factor VAV2 OS=Homo sapiens GN=VAV2 PE=1 SV=2	P	GO:0043065	positive regulation of apoptotic process
P52735	VAV2_HUMANGuanine nucleotide exchange factor VAV2 OS=Homo sapiens GN=VAV2 PE=1 SV=2	P	GO:0043087	regulation of GTPase activity
P52735	VAV2_HUMANGuanine nucleotide exchange factor VAV2 OS=Homo sapiens GN=VAV2 PE=1 SV=2	P	GO:0048010	vascular endothelial growth factor receptor signaling pathway
P52735	VAV2_HUMANGuanine nucleotide exchange factor VAV2 OS=Homo sapiens GN=VAV2 PE=1 SV=2	P	GO:0048013	ephrin receptor signaling pathway
P52735	VAV2_HUMANGuanine nucleotide exchange factor VAV2 OS=Homo sapiens GN=VAV2 PE=1 SV=2	P	GO:0048731	system development
B3KXW2	ZN532_HUMANZinc finger 532 OS=Homo sapiens GN=ZNF532 PE=1 SV=2	F	GO:0003677	DNA binding
B3KXW2	ZN532_HUMANZinc finger 532 OS=Homo sapiens GN=ZNF532 PE=1 SV=2	F	GO:0046872	metal ion binding
Q52LW3	RHG29_HUMANRho GTPase-activating 29 OS=Homo sapiens GN=ARHGAP29 PE=1 SV=2	C	GO:0005829	cytosol
Q52LW3	RHG29_HUMANRho GTPase-activating 29 OS=Homo sapiens GN=ARHGAP29 PE=1 SV=2	C	GO:0043229	intracellular organelle
Q52LW3	RHG29_HUMANRho GTPase-activating 29 OS=Homo sapiens GN=ARHGAP29 PE=1 SV=2	F	GO:0005096	GTPase activator activity
Q52LW3	RHG29_HUMANRho GTPase-activating 29 OS=Homo sapiens GN=ARHGAP29 PE=1 SV=2	F	GO:0030165	PDZ domain binding
Q52LW3	RHG29_HUMANRho GTPase-activating 29 OS=Homo sapiens GN=ARHGAP29 PE=1 SV=2	P	GO:0007266	Rho protein signal transduction
Q52LW3	RHG29_HUMANRho GTPase-activating 29 OS=Homo sapiens GN=ARHGAP29 PE=1 SV=2	P	GO:0051056	regulation of small GTPase mediated signal transduction
Q6PJ25	AT11A_HUMANProbable phospholipid-transporting ATPase IH OS=Homo sapiens GN=ATP11A PE=1 SV=3	C	GO:0005765	lysosomal membrane
Q6PJ25	AT11A_HUMANProbable phospholipid-transporting ATPase IH OS=Homo sapiens GN=ATP11A PE=1 SV=3	C	GO:0005783	endoplasmic reticulum
Q6PJ25	AT11A_HUMANProbable phospholipid-transporting ATPase IH OS=Homo sapiens GN=ATP11A PE=1 SV=3	C	GO:0005886	plasma membrane
Q6PJ25	AT11A_HUMANProbable phospholipid-transporting ATPase IH OS=Homo sapiens GN=ATP11A PE=1 SV=3	C	GO:0016021	integral to membrane
Q6PJ25	AT11A_HUMANProbable phospholipid-transporting ATPase IH OS=Homo sapiens GN=ATP11A PE=1 SV=3	C	GO:0055037	recycling endosome
Q6PJ25	AT11A_HUMANProbable phospholipid-transporting ATPase IH OS=Homo sapiens GN=ATP11A PE=1 SV=3	F	GO:0000287	magnesium ion binding
Q6PJ25	AT11A_HUMANProbable phospholipid-transporting ATPase IH OS=Homo sapiens GN=ATP11A PE=1 SV=3	F	GO:0004012	phospholipid-translocating ATPase activity
Q6PJ25	AT11A_HUMANProbable phospholipid-transporting ATPase IH OS=Homo sapiens GN=ATP11A PE=1 SV=3	F	GO:0005515	protein binding
Q6PJ25	AT11A_HUMANProbable phospholipid-transporting ATPase IH OS=Homo sapiens GN=ATP11A PE=1 SV=3	F	GO:0005524	ATP binding
Q6PJ25	AT11A_HUMANProbable phospholipid-transporting ATPase IH OS=Homo sapiens GN=ATP11A PE=1 SV=3	P	GO:0044763	single-organism cellular process
Q6PJ25	AT11A_HUMANProbable phospholipid-transporting ATPase IH OS=Homo sapiens GN=ATP11A PE=1 SV=3	P	GO:0048731	system development
Q6PJ25	AT11A_HUMANProbable phospholipid-transporting ATPase IH OS=Homo sapiens GN=ATP11A PE=1 SV=3	P	GO:0050794	regulation of cellular process
Q6PJ25	AT11A_HUMANProbable phospholipid-transporting ATPase IH OS=Homo sapiens GN=ATP11A PE=1 SV=3	P	GO:0061024	membrane organization
Q6PJ25	AT11A_HUMANProbable phospholipid-transporting ATPase IH OS=Homo sapiens GN=ATP11A PE=1 SV=3	P	GO:0006812	cation transport
Q6PJ25	AT11A_HUMANProbable phospholipid-transporting ATPase IH OS=Homo sapiens GN=ATP11A PE=1 SV=3	P	GO:0015917	aminophospholipid transport
Q9Y4B5	MTCL1_HUMANMicrotubule cross-linking factor 1 OS=Homo sapiens GN=MTCL1 PE=1 SV=5	C	GO:0000922	spindle pole
Q9Y4B5	MTCL1_HUMANMicrotubule cross-linking factor 1 OS=Homo sapiens GN=MTCL1 PE=1 SV=5	C	GO:0005615	extracellular space
Q9Y4B5	MTCL1_HUMANMicrotubule cross-linking factor 1 OS=Homo sapiens GN=MTCL1 PE=1 SV=5	C	GO:0030496	midbody
Q9Y4B5	MTCL1_HUMANMicrotubule cross-linking factor 1 OS=Homo sapiens GN=MTCL1 PE=1 SV=5	N	GO:0098590
Q9Y4B5	MTCL1_HUMANMicrotubule cross-linking factor 1 OS=Homo sapiens GN=MTCL1 PE=1 SV=5	F	GO:0008017	microtubule binding
Q9Y4B5	MTCL1_HUMANMicrotubule cross-linking factor 1 OS=Homo sapiens GN=MTCL1 PE=1 SV=5	N	GO:0044822
Q9Y4B5	MTCL1_HUMANMicrotubule cross-linking factor 1 OS=Homo sapiens GN=MTCL1 PE=1 SV=5	P	GO:0010506	regulation of autophagy
Q9Y4B5	MTCL1_HUMANMicrotubule cross-linking factor 1 OS=Homo sapiens GN=MTCL1 PE=1 SV=5	P	GO:0044763	single-organism cellular process
Q9Y4B5	MTCL1_HUMANMicrotubule cross-linking factor 1 OS=Homo sapiens GN=MTCL1 PE=1 SV=5	C	GO:0045298	tubulin complex
Q09472	EP300_HUMANHistone acetyltransferase p300 OS=Homo sapiens GN=EP300 PE=1 SV=2	C	GO:0000123	histone acetyltransferase complex
Q09472	EP300_HUMANHistone acetyltransferase p300 OS=Homo sapiens GN=EP300 PE=1 SV=2	C	GO:0005737	cytoplasm
Q09472	EP300_HUMANHistone acetyltransferase p300 OS=Homo sapiens GN=EP300 PE=1 SV=2	F	GO:0001047	core promoter binding
Q09472	EP300_HUMANHistone acetyltransferase p300 OS=Homo sapiens GN=EP300 PE=1 SV=2	F	GO:0001102	RNA polymerase II activating transcription factor binding
Q09472	EP300_HUMANHistone acetyltransferase p300 OS=Homo sapiens GN=EP300 PE=1 SV=2	F	GO:0003682	chromatin binding
Q09472	EP300_HUMANHistone acetyltransferase p300 OS=Homo sapiens GN=EP300 PE=1 SV=2	F	GO:0003684	damaged DNA binding
Q09472	EP300_HUMANHistone acetyltransferase p300 OS=Homo sapiens GN=EP300 PE=1 SV=2	F	GO:0003713	transcription coactivator activity
Q09472	EP300_HUMANHistone acetyltransferase p300 OS=Homo sapiens GN=EP300 PE=1 SV=2	F	GO:0004402	histone acetyltransferase activity
Q09472	EP300_HUMANHistone acetyltransferase p300 OS=Homo sapiens GN=EP300 PE=1 SV=2	F	GO:0004468	lysine N-acetyltransferase activity
Q09472	EP300_HUMANHistone acetyltransferase p300 OS=Homo sapiens GN=EP300 PE=1 SV=2	F	GO:0008013	beta-catenin binding
Q09472	EP300_HUMANHistone acetyltransferase p300 OS=Homo sapiens GN=EP300 PE=1 SV=2	F	GO:0008022	protein C-terminus binding
Q09472	EP300_HUMANHistone acetyltransferase p300 OS=Homo sapiens GN=EP300 PE=1 SV=2	F	GO:0008270	zinc ion binding
Q09472	EP300_HUMANHistone acetyltransferase p300 OS=Homo sapiens GN=EP300 PE=1 SV=2	F	GO:0050681	androgen receptor binding
Q09472	EP300_HUMANHistone acetyltransferase p300 OS=Homo sapiens GN=EP300 PE=1 SV=2	P	GO:0000122	negative regulation of transcription from RNA polymerase II promoter
Q09472	EP300_HUMANHistone acetyltransferase p300 OS=Homo sapiens GN=EP300 PE=1 SV=2	P	GO:0002223	stimulatory C-type lectin receptor signaling pathway
Q09472	EP300_HUMANHistone acetyltransferase p300 OS=Homo sapiens GN=EP300 PE=1 SV=2	P	GO:0006283	transcription-coupled nucleotide-excision repair
Q09472	EP300_HUMANHistone acetyltransferase p300 OS=Homo sapiens GN=EP300 PE=1 SV=2	P	GO:0006977	DNA damage response, signal transduction by p53 class mediator resulting in cell cycle arrest
Q09472	EP300_HUMANHistone acetyltransferase p300 OS=Homo sapiens GN=EP300 PE=1 SV=2	P	GO:0007219	Notch signaling pathway
Q09472	EP300_HUMANHistone acetyltransferase p300 OS=Homo sapiens GN=EP300 PE=1 SV=2	P	GO:0007399	nervous system development
Q09472	EP300_HUMANHistone acetyltransferase p300 OS=Homo sapiens GN=EP300 PE=1 SV=2	P	GO:0010035	response to inorganic substance
Q09472	EP300_HUMANHistone acetyltransferase p300 OS=Homo sapiens GN=EP300 PE=1 SV=2	P	GO:0010506	regulation of autophagy
Q09472	EP300_HUMANHistone acetyltransferase p300 OS=Homo sapiens GN=EP300 PE=1 SV=2	P	GO:0018076	N-terminal peptidyl-lysine acetylation
Q09472	EP300_HUMANHistone acetyltransferase p300 OS=Homo sapiens GN=EP300 PE=1 SV=2	P	GO:0022603	regulation of anatomical structure morphogenesis
Q09472	EP300_HUMANHistone acetyltransferase p300 OS=Homo sapiens GN=EP300 PE=1 SV=2	P	GO:0030154	cell differentiation
Q09472	EP300_HUMANHistone acetyltransferase p300 OS=Homo sapiens GN=EP300 PE=1 SV=2	P	GO:0032270	positive regulation of cellular protein metabolic process
Q09472	EP300_HUMANHistone acetyltransferase p300 OS=Homo sapiens GN=EP300 PE=1 SV=2	P	GO:0032481	positive regulation of type I interferon production
Q09472	EP300_HUMANHistone acetyltransferase p300 OS=Homo sapiens GN=EP300 PE=1 SV=2	P	GO:0034644	cellular response to UV
Q09472	EP300_HUMANHistone acetyltransferase p300 OS=Homo sapiens GN=EP300 PE=1 SV=2	P	GO:0042771	intrinsic apoptotic signaling pathway in response to DNA damage by p53 class mediator
Q09472	EP300_HUMANHistone acetyltransferase p300 OS=Homo sapiens GN=EP300 PE=1 SV=2	P	GO:0042981	regulation of apoptotic process
Q09472	EP300_HUMANHistone acetyltransferase p300 OS=Homo sapiens GN=EP300 PE=1 SV=2	P	GO:0043627	response to estrogen stimulus
Q09472	EP300_HUMANHistone acetyltransferase p300 OS=Homo sapiens GN=EP300 PE=1 SV=2	P	GO:0043923	positive regulation by host of viral transcription
Q09472	EP300_HUMANHistone acetyltransferase p300 OS=Homo sapiens GN=EP300 PE=1 SV=2	P	GO:0043967	histone H4 acetylation
Q09472	EP300_HUMANHistone acetyltransferase p300 OS=Homo sapiens GN=EP300 PE=1 SV=2	P	GO:0043969	histone H2B acetylation
Q09472	EP300_HUMANHistone acetyltransferase p300 OS=Homo sapiens GN=EP300 PE=1 SV=2	P	GO:0045815	positive regulation of gene expression, epigenetic
Q09472	EP300_HUMANHistone acetyltransferase p300 OS=Homo sapiens GN=EP300 PE=1 SV=2	P	GO:0045944	positive regulation of transcription from RNA polymerase II promoter
Q09472	EP300_HUMANHistone acetyltransferase p300 OS=Homo sapiens GN=EP300 PE=1 SV=2	P	GO:0048511	rhythmic process
Q09472	EP300_HUMANHistone acetyltransferase p300 OS=Homo sapiens GN=EP300 PE=1 SV=2	P	GO:0048513	organ development
Q09472	EP300_HUMANHistone acetyltransferase p300 OS=Homo sapiens GN=EP300 PE=1 SV=2	P	GO:0051091	positive regulation of sequence-specific DNA binding transcription factor activity
Q09472	EP300_HUMANHistone acetyltransferase p300 OS=Homo sapiens GN=EP300 PE=1 SV=2	P	GO:0051130	positive regulation of cellular component organization
Q09472	EP300_HUMANHistone acetyltransferase p300 OS=Homo sapiens GN=EP300 PE=1 SV=2	P	GO:0060548	negative regulation of cell death
Q09472	EP300_HUMANHistone acetyltransferase p300 OS=Homo sapiens GN=EP300 PE=1 SV=2	P	GO:0060765	regulation of androgen receptor signaling pathway
Q09472	EP300_HUMANHistone acetyltransferase p300 OS=Homo sapiens GN=EP300 PE=1 SV=2	P	GO:0061418	regulation of transcription from RNA polymerase II promoter in response to hypoxia
Q09472	EP300_HUMANHistone acetyltransferase p300 OS=Homo sapiens GN=EP300 PE=1 SV=2	P	GO:0090043	regulation of tubulin deacetylation
Q09472	EP300_HUMANHistone acetyltransferase p300 OS=Homo sapiens GN=EP300 PE=1 SV=2	P	GO:1900034	regulation of cellular response to heat
Q09472	EP300_HUMANHistone acetyltransferase p300 OS=Homo sapiens GN=EP300 PE=1 SV=2	P	GO:1901701	cellular response to oxygen-containing compound
Q09472	EP300_HUMANHistone acetyltransferase p300 OS=Homo sapiens GN=EP300 PE=1 SV=2	P	GO:1901796	regulation of signal transduction by p53 class mediator
Q09472	EP300_HUMANHistone acetyltransferase p300 OS=Homo sapiens GN=EP300 PE=1 SV=2	N	GO:1904837
Q09472	EP300_HUMANHistone acetyltransferase p300 OS=Homo sapiens GN=EP300 PE=1 SV=2	C	GO:0000785	chromatin
Q09472	EP300_HUMANHistone acetyltransferase p300 OS=Homo sapiens GN=EP300 PE=1 SV=2	C	GO:0005667	transcription factor complex
Q09472	EP300_HUMANHistone acetyltransferase p300 OS=Homo sapiens GN=EP300 PE=1 SV=2	P	GO:0045941	positive regulation of transcription, DNA-dependent
Q09472	EP300_HUMANHistone acetyltransferase p300 OS=Homo sapiens GN=EP300 PE=1 SV=2	P	GO:0042967	acyl-carrier-protein biosynthetic process
Q09472	EP300_HUMANHistone acetyltransferase p300 OS=Homo sapiens GN=EP300 PE=1 SV=2	P	GO:0006554	lysine catabolic process
Q09472	EP300_HUMANHistone acetyltransferase p300 OS=Homo sapiens GN=EP300 PE=1 SV=2	C	GO:0016342	catenin complex
O15230	LAMA5_HUMANLaminin subunit alpha-5 OS=Homo sapiens GN=LAMA5 PE=1 SV=8	C	GO:0005615	extracellular space
O15230	LAMA5_HUMANLaminin subunit alpha-5 OS=Homo sapiens GN=LAMA5 PE=1 SV=8	C	GO:0005634	nucleus
O15230	LAMA5_HUMANLaminin subunit alpha-5 OS=Homo sapiens GN=LAMA5 PE=1 SV=8	C	GO:0043259	laminin-10 complex
O15230	LAMA5_HUMANLaminin subunit alpha-5 OS=Homo sapiens GN=LAMA5 PE=1 SV=8	C	GO:0043260	laminin-11 complex
O15230	LAMA5_HUMANLaminin subunit alpha-5 OS=Homo sapiens GN=LAMA5 PE=1 SV=8	C	GO:0070062	extracellular vesicular exosome
O15230	LAMA5_HUMANLaminin subunit alpha-5 OS=Homo sapiens GN=LAMA5 PE=1 SV=8	F	GO:0005178	integrin binding
O15230	LAMA5_HUMANLaminin subunit alpha-5 OS=Homo sapiens GN=LAMA5 PE=1 SV=8	F	GO:0005198	structural molecule activity
O15230	LAMA5_HUMANLaminin subunit alpha-5 OS=Homo sapiens GN=LAMA5 PE=1 SV=8	P	GO:0002009	morphogenesis of an epithelium
O15230	LAMA5_HUMANLaminin subunit alpha-5 OS=Homo sapiens GN=LAMA5 PE=1 SV=8	P	GO:0006996	organelle organization
O15230	LAMA5_HUMANLaminin subunit alpha-5 OS=Homo sapiens GN=LAMA5 PE=1 SV=8	P	GO:0007044	cell-substrate junction assembly
O15230	LAMA5_HUMANLaminin subunit alpha-5 OS=Homo sapiens GN=LAMA5 PE=1 SV=8	P	GO:0007229	integrin-mediated signaling pathway
O15230	LAMA5_HUMANLaminin subunit alpha-5 OS=Homo sapiens GN=LAMA5 PE=1 SV=8	P	GO:0009887	organ morphogenesis
O15230	LAMA5_HUMANLaminin subunit alpha-5 OS=Homo sapiens GN=LAMA5 PE=1 SV=8	P	GO:0030030	cell projection organization
O15230	LAMA5_HUMANLaminin subunit alpha-5 OS=Homo sapiens GN=LAMA5 PE=1 SV=8	P	GO:0030155	regulation of cell adhesion
O15230	LAMA5_HUMANLaminin subunit alpha-5 OS=Homo sapiens GN=LAMA5 PE=1 SV=8	P	GO:0030198	extracellular matrix organization
O15230	LAMA5_HUMANLaminin subunit alpha-5 OS=Homo sapiens GN=LAMA5 PE=1 SV=8	P	GO:0030334	regulation of cell migration
O15230	LAMA5_HUMANLaminin subunit alpha-5 OS=Homo sapiens GN=LAMA5 PE=1 SV=8	P	GO:0030855	epithelial cell differentiation
O15230	LAMA5_HUMANLaminin subunit alpha-5 OS=Homo sapiens GN=LAMA5 PE=1 SV=8	P	GO:0034446	substrate adhesion-dependent cell spreading
O15230	LAMA5_HUMANLaminin subunit alpha-5 OS=Homo sapiens GN=LAMA5 PE=1 SV=8	P	GO:0045995	regulation of embryonic development
O15230	LAMA5_HUMANLaminin subunit alpha-5 OS=Homo sapiens GN=LAMA5 PE=1 SV=8	P	GO:0048646	anatomical structure formation involved in morphogenesis
O15230	LAMA5_HUMANLaminin subunit alpha-5 OS=Homo sapiens GN=LAMA5 PE=1 SV=8	C	GO:0008305	integrin complex

## Sheet: BP
GO function annotation and analysis different expressed proteins of OXA vs. control BP
Level	GO_ID	Term	Type	Seqs_Num	Sequences
1	GO:0008150	biological_process	Biological Process	95	O95478, Q6DKI1, Q8N5I2, A0A0A0MTB0, Q96EX3, Q5VV42, P62081, O43678, B5BU78, B2R823, Q5JR08, Q96T88, Q6PJ25, H0UI22, P62273, P53609, D3DR37, A0A140VJE0, B4DYY3, P07311, B6CGU5, Q52LW3, P82914, Q92604, Q12872, A0A024RDF4, A0A097PY54, J3QR09, B4DE67, B0AZV9, Q2M2H8, Q9Y6H1, D6RIZ4, O43805, Q6QN92, Q9NY93, F8VZJ2, P63173, A0A024R8K7, P83881, B3KRC6, A8K201, H3BMQ2, D6RBD9, O00767, Q9H5M4, Q09472, Q5T…
2	GO:0048518	positive regulation of biological process	Biological Process	27	Q9H5M4, Q09472, Q5TEC6, Q9BVP2, A0A087X1T2, P52735, A8KAQ3, Q75MX0, Q5JR08, Q96T88, P08581, P08582, B2R841, B2R4U3, P53609, B4DT46, P17096, A0A024R2W4, F1JVV5, B6CGU5, C9JCN8, A0A024RDF4, Q9Y6H1, F8VZJ2, B2R4N3, A0A024R8K7, A5YRV2
2	GO:0071840	cellular component organization or biogenesis	Biological Process	55	O95478, Q6DKI1, P62081, O43678, B2R823, Q5JR08, Q96T88, Q6PJ25, P62273, D3DR37, B4DYY3, B6CGU5, P82914, Q12872, J3QR09, B0AZV9, Q9NY93, P63173, A0A024R8K7, P83881, A8K201, H3BMQ2, Q9H5M4, Q09472, Q13895, Q5TEC6, A0A087X1T2, Q9BVP2, P52735, A8KAQ3, Q75MX0, Q9H9Y2, P08581, B2R841, P08582, B2R4U3, P17096, B4DT46, P62857, A0A024R2W4, F1JVV5, Q96GA3, Q6FHK1, O75438, C9JCN8, Q14517, O15230, Q8IY37, B3K…
2	GO:0022414	reproductive process	Biological Process	2	Q13895, B2R841
2	GO:0048519	negative regulation of biological process	Biological Process	23	B6CGU5, Q5TEC6, Q09472, C9JCN8, Q8N4P8, A0A087X1T2, A0A024RDF4, A8KAQ3, F8VZJ2, Q75MX0, Q5JR08, Q96T88, P08581, B2R841, A0A024R8K7, P08582, B2R4U3, A5YRV2, P17096, A0A024R2W4, Q86U90, B1ALI9, F1JVV5
2	GO:0050896	response to stimulus	Biological Process	35	Q9H5M4, Q13895, Q5TEC6, Q09472, A0A087X1T2, Q8N5I2, A0A0A0MTB0, P52735, A8KAQ3, Q75MX0, Q5JR08, Q96T88, P08581, B2R841, B2R4U3, P53609, B4DT46, P17096, A0A024R2W4, B1ALI9, B4DYY3, F1JVV5, B6CGU5, Q52LW3, C9JCN8, Q14517, O15230, A0A024RDF4, D6RIZ4, Q9Y6H1, B4DE48, Q5JXX1, P62861, A0A024R8K7, A5YRV2
2	GO:0044848	biological phase	Biological Process	2	B2R841, B2R4U3
2	GO:0009987	cellular process	Biological Process	90	O95478, Q6DKI1, Q8N5I2, A0A0A0MTB0, Q96EX3, Q5VV42, P62081, O43678, B5BU78, B2R823, Q5JR08, Q96T88, Q6PJ25, H0UI22, P62273, P53609, D3DR37, A0A140VJE0, B4DYY3, P07311, B6CGU5, Q52LW3, P82914, Q92604, Q12872, A0A024RDF4, A0A097PY54, J3QR09, B4DE67, B0AZV9, Q2M2H8, Q9Y6H1, O43805, Q6QN92, Q9NY93, F8VZJ2, P63173, A0A024R8K7, P83881, B3KRC6, H3BMQ2, A8K201, D6RBD9, O00767, Q9H5M4, Q09472, Q5TEC6, Q13…
2	GO:0051704	multi-organism process	Biological Process	19	Q09472, Q5TEC6, Q13895, C9JCN8, A0A0A0MTB0, J3QR09, P62081, Q6IAM0, P62861, P63173, P08581, P62273, P83881, P17096, B4DT46, A0A024R2W4, P62857, A8K7D9, P62269
2	GO:0051179	localization	Biological Process	43	Q9H5M4, A0A087X1T2, Q9BVP2, A0A0A0MTB0, A6NLH6, P62081, P52735, A8KAQ3, B5BU78, Q75MX0, Q5JR08, P08581, Q03169, Q6PJ25, B2R841, P08582, P62273, P17096, B4DT46, D3DR37, Q86U90, A0A024R2W4, P62857, B4DYY3, Q9HBR0, O75438, A0A024R7S3, Q14517, Q8N4P8, O15230, A0A097PY54, A0A024RDF4, J3QR09, B0AZV9, B4DE48, D6RIZ4, B2R4N3, P62861, P63173, A0A024R8K7, P83881, A8K7D9, P62269
2	GO:0040007	growth	Biological Process	3	Q5TEC6, P08582, Q75MX0
2	GO:0002376	immune system process	Biological Process	11	B6CGU5, Q09472, Q5TEC6, Q5JR08, P62861, P08581, A0A024R8K7, A0A0A0MTB0, B4DT46, P52735, Q75MX0
2	GO:0022610	biological adhesion	Biological Process	8	Q13895, Q5JR08, Q14517, Q8N4P8, A0A024R8K7, P08582, O15230, A5YRV2
2	GO:0008152	metabolic process	Biological Process	72	O95478, Q6DKI1, A0A0A0MTB0, Q5VV42, P62081, O43678, B5BU78, B2R823, Q5JR08, Q96T88, H0UI22, P62273, P53609, A0A140VJE0, P07311, B6CGU5, P82914, Q12872, Q92604, A0A024RDF4, A0A097PY54, J3QR09, B4DE67, Q2M2H8, Q9Y6H1, Q6QN92, Q9NY93, F8VZJ2, P63173, A0A024R8K7, P83881, B3KRC6, A8K201, O00767, Q9H5M4, Q09472, Q5TEC6, Q13895, Q8NEF9, A0A087X1T2, Q9BVP2, P52735, A8KAQ3, Q9H9Y2, P08581, B2R841, P08582,…
2	GO:0040011	locomotion	Biological Process	9	Q5JR08, Q14517, Q8N4P8, P08581, A0A024R8K7, O15230, A0A024R2W4, Q75MX0, B5BU78
2	GO:0048511	rhythmic process	Biological Process	2	Q09472, A0A024RDF4
2	GO:0023052	signaling	Biological Process	22	B6CGU5, Q9H5M4, Q52LW3, Q09472, C9JCN8, Q14517, O15230, P52735, B4DE48, A8KAQ3, Q75MX0, Q5JR08, P08581, B2R841, A0A024R8K7, B2R4U3, A5YRV2, B4DT46, P17096, A0A024R2W4, B4DYY3, F1JVV5
2	GO:0032502	developmental process	Biological Process	28	Q9H5M4, Q09472, Q13895, A0A087X1T2, A0A0A0MTB0, P52735, A8KAQ3, Q75MX0, Q5JR08, Q96T88, P08581, Q6PJ25, P08582, P17096, A0A024R2W4, B1ALI9, B4DYY3, F1JVV5, B6CGU5, O00458, O75911, C9JCN8, Q14517, Q8N4P8, O15230, A0A024RDF4, F8VZJ2, A0A024R8K7
2	GO:0050789	regulation of biological process	Biological Process	48	Q9H5M4, Q09472, Q5TEC6, A0A087X1T2, Q9BVP2, Q8N5I2, Q96EX3, P52735, A8KAQ3, Q75MX0, B5BU78, Q5JR08, Q96T88, P08581, Q6PJ25, P08582, B2R841, B2R4U3, P53609, P17096, B4DT46, Q86U90, A0A024R2W4, B1ALI9, B4DYY3, F1JVV5, F6TR53, B6CGU5, Q52LW3, O75911, C9JCN8, Q12872, Q8N4P8, Q14517, Q13823, O15230, A0A024RDF4, Q9Y6H1, B4DE48, Q9NY93, F8VZJ2, B2R4N3, Q6IAM0, Q9Y4B5, A0A024R8K7, A5YRV2, A8K7D9, D6RBD9
2	GO:0044699	single-organism process	Biological Process	74	A0A0A0MTB0, Q96EX3, P62081, O43678, B5BU78, Q5JR08, Q96T88, Q6PJ25, H0UI22, P62273, P53609, D3DR37, A0A140VJE0, B4DYY3, P07311, B6CGU5, Q52LW3, P82914, Q92604, A0A024RDF4, A0A097PY54, J3QR09, B4DE67, B0AZV9, Q2M2H8, D6RIZ4, O43805, Q6QN92, Q9NY93, F8VZJ2, P63173, A0A024R8K7, P83881, B3KRC6, D6RBD9, O00767, Q9H5M4, Q09472, Q5TEC6, Q13895, A0A087X1T2, P52735, A8KAQ3, Q75MX0, P08581, Q03169, P08582,…
2	GO:0065007	biological regulation	Biological Process	49	Q8N5I2, Q96EX3, A0A0A0MTB0, B5BU78, Q5JR08, Q96T88, Q6PJ25, P53609, B4DYY3, B6CGU5, Q52LW3, Q12872, A0A024RDF4, Q9Y6H1, Q9NY93, F8VZJ2, A0A024R8K7, D6RBD9, Q9H5M4, Q09472, Q5TEC6, A0A087X1T2, Q9BVP2, P52735, A8KAQ3, Q75MX0, P08581, P08582, B2R841, B2R4U3, P17096, B4DT46, A0A024R2W4, Q86U90, B1ALI9, F1JVV5, F6TR53, O75911, C9JCN8, Q8N4P8, Q14517, Q13823, O15230, B4DE48, B2R4N3, Q6IAM0, Q9Y4B5, A5Y…
2	GO:0032501	multicellular organismal process	Biological Process	31	Q09472, Q13895, Q5TEC6, A0A087X1T2, A0A0A0MTB0, P52735, A8KAQ3, Q75MX0, B5BU78, Q5JR08, Q96T88, P08581, Q6PJ25, B4DT46, A0A024R2W4, B1ALI9, B4DYY3, Q9HBR0, F1JVV5, B6CGU5, O75911, C9JCN8, Q14517, Q8N4P8, O15230, A0A024RDF4, B4DE67, Q2M2H8, F8VZJ2, P63173, A0A024R8K7
2	GO:0000003	reproduction	Biological Process	2	Q13895, B2R841
3	GO:0048870	cell motility	Biological Process	9	Q5JR08, Q14517, Q8N4P8, P08581, A0A024R8K7, O15230, A0A024R2W4, B5BU78, Q75MX0
3	GO:0051093	negative regulation of developmental process	Biological Process	3	Q5JR08, P08582, Q75MX0
3	GO:0044706	multi-multicellular organism process	Biological Process	1	Q13895
3	GO:0051321	meiotic cell cycle	Biological Process	1	B2R841
3	GO:0016049	cell growth	Biological Process	3	Q5TEC6, P08582, Q75MX0
3	GO:0051094	positive regulation of developmental process	Biological Process	5	Q5JR08, P17096, A0A024R2W4, F8VZJ2, F1JVV5
3	GO:0002252	immune effector process	Biological Process	3	Q5TEC6, A0A0A0MTB0, P52735
3	GO:1903046	meiotic cell cycle process	Biological Process	1	B2R841
3	GO:0002682	regulation of immune system process	Biological Process	6	B6CGU5, Q09472, Q5TEC6, Q5JR08, B4DT46, P52735
3	GO:0050793	regulation of developmental process	Biological Process	11	Q09472, Q5JR08, P08581, P08582, A0A024R8K7, O15230, P17096, A0A024R2W4, Q75MX0, F1JVV5, F8VZJ2
3	GO:0009058	biosynthetic process	Biological Process	39	O00767, Q09472, Q5TEC6, Q9BVP2, A0A087X1T2, Q6DKI1, P62081, Q96T88, P08581, B2R841, H0UI22, P62273, P17096, B4DT46, A0A140VJE0, P62857, A0A024R2W4, P07311, F1JVV5, Q6FHK1, P82914, O75438, C9JCN8, Q92604, Q8N4P8, A0A024RDF4, A0A097PY54, J3QR09, B4DE67, Q9Y6H1, B3KS36, F8VZJ2, Q6IAM0, P62861, P63173, A5YRV2, P83881, B3KRC6, P62269
3	GO:0051674	localization of cell	Biological Process	9	Q5JR08, Q14517, Q8N4P8, P08581, A0A024R8K7, O15230, A0A024R2W4, B5BU78, Q75MX0
3	GO:0019882	antigen processing and presentation	Biological Process	1	B4DT46
3	GO:0008283	cell proliferation	Biological Process	9	Q5JR08, C9JCN8, Q96T88, Q8N4P8, P08581, P08582, B2R841, P53609, P17096
3	GO:0043902	positive regulation of multi-organism process	Biological Process	2	Q09472, B4DT46
3	GO:0048584	positive regulation of response to stimulus	Biological Process	8	B6CGU5, Q9H5M4, Q09472, Q5JR08, P08581, B4DT46, P17096, P52735
3	GO:0006955	immune response	Biological Process	6	Q09472, P62861, A0A0A0MTB0, B4DT46, P52735, Q75MX0
3	GO:0043627	response to estrogen	Biological Process	1	Q09472
3	GO:0048585	negative regulation of response to stimulus	Biological Process	3	P08581, A5YRV2, A0A024R2W4
3	GO:0022403	cell cycle phase	Biological Process	2	B2R841, B2R4U3
3	GO:0044238	primary metabolic process	Biological Process	67	O95478, Q6DKI1, A0A0A0MTB0, Q5VV42, P62081, O43678, B5BU78, B2R823, Q5JR08, Q96T88, H0UI22, P62273, P53609, A0A140VJE0, P07311, B6CGU5, P82914, Q12872, Q92604, A0A024RDF4, A0A097PY54, J3QR09, B4DE67, Q2M2H8, Q9Y6H1, Q6QN92, Q9NY93, F8VZJ2, P63173, P83881, B3KRC6, A8K201, O00767, Q9H5M4, Q09472, Q13895, Q5TEC6, Q8NEF9, A0A087X1T2, Q9BVP2, Q9H9Y2, P08581, B2R841, P08582, B2R4U3, P17096, P62857, A0A…
3	GO:0051091	positive regulation of sequence-specific DNA binding transcription factor activity	Biological Process	1	Q09472
3	GO:0042445	hormone metabolic process	Biological Process	1	O75911
3	GO:0040013	negative regulation of locomotion	Biological Process	4	Q5JR08, Q8N4P8, A0A024R2W4, Q75MX0
3	GO:0048646	anatomical structure formation involved in morphogenesis	Biological Process	6	Q9H5M4, Q5JR08, A0A024R8K7, O15230, A0A024R2W4, B4DYY3
3	GO:0042330	taxis	Biological Process	3	Q5JR08, P08581, Q75MX0
3	GO:1903829	positive regulation of cellular protein localization	Biological Process	5	B2R4N3, Q5JR08, B2R841, A0A087X1T2, Q9BVP2
3	GO:0048589	developmental growth	Biological Process	1	Q75MX0
3	GO:0043900	regulation of multi-organism process	Biological Process	3	Q09472, Q5TEC6, B4DT46
3	GO:0051239	regulation of multicellular organismal process	Biological Process	11	Q09472, Q5JR08, P08581, A0A024R8K7, O15230, B4DT46, A0A024R2W4, P52735, Q75MX0, F8VZJ2, F1JVV5
3	GO:0009892	negative regulation of metabolic process	Biological Process	13	Q5TEC6, Q09472, C9JCN8, Q8N4P8, A0A087X1T2, A0A024RDF4, Q96T88, B2R841, A5YRV2, B2R4U3, P17096, A0A024R2W4, F1JVV5
3	GO:0032879	regulation of localization	Biological Process	12	Q8N4P8, A0A087X1T2, Q9BVP2, O15230, Q75MX0, B2R4N3, Q5JR08, P08581, B2R841, B4DT46, A0A024R2W4, Q86U90
3	GO:0040017	positive regulation of locomotion	Biological Process	3	Q5JR08, P08581, Q75MX0
3	GO:0009893	positive regulation of metabolic process	Biological Process	19	B6CGU5, Q9H5M4, Q09472, Q5TEC6, C9JCN8, Q9BVP2, A0A087X1T2, A0A024RDF4, Q9Y6H1, Q5JR08, Q96T88, P08581, B2R841, P08582, B2R4U3, A5YRV2, B4DT46, P17096, F1JVV5
3	GO:0051235	maintenance of location	Biological Process	2	A0A087X1T2, A0A024R2W4
3	GO:1900046	regulation of hemostasis	Biological Process	1	P52735
3	GO:0032844	regulation of homeostatic process	Biological Process	2	Q9BVP2, B2R4U3
3	GO:0044764	multi-organism cellular process	Biological Process	15	Q09472, Q5TEC6, A0A0A0MTB0, J3QR09, P62081, Q6IAM0, P62861, P63173, P62273, P83881, P17096, P62857, A0A024R2W4, A8K7D9, P62269
3	GO:0042752	regulation of circadian rhythm	Biological Process	1	A0A024RDF4
3	GO:0051716	cellular response to stimulus	Biological Process	29	Q9H5M4, Q09472, Q13895, Q5TEC6, A0A087X1T2, P52735, A8KAQ3, Q75MX0, Q5JR08, Q96T88, P08581, B2R841, B2R4U3, B4DT46, P17096, A0A024R2W4, B1ALI9, B4DYY3, F1JVV5, B6CGU5, Q52LW3, C9JCN8, O15230, A0A024RDF4, B4DE48, Q9Y6H1, Q5JXX1, A0A024R8K7, A5YRV2
3	GO:0009628	response to abiotic stimulus	Biological Process	5	B6CGU5, Q5JR08, Q09472, C9JCN8, Q9Y6H1
3	GO:0000920	cell separation after cytokinesis	Biological Process	1	D3DR37
3	GO:0009719	response to endogenous stimulus	Biological Process	7	Q5JR08, Q09472, C9JCN8, P08581, A0A087X1T2, A8KAQ3, F1JVV5
3	GO:0065009	regulation of molecular function	Biological Process	11	B6CGU5, Q9H5M4, Q09472, Q5JR08, Q96T88, P08581, Q8N4P8, B2R841, B2R4U3, P52735, A8KAQ3
3	GO:0007623	circadian rhythm	Biological Process	1	A0A024RDF4
3	GO:0002684	positive regulation of immune system process	Biological Process	4	Q09472, Q5JR08, B4DT46, P52735
3	GO:0023051	regulation of signaling	Biological Process	11	B6CGU5, Q9H5M4, Q52LW3, Q5JR08, Q09472, P08581, B2R841, A5YRV2, B4DT46, A0A024R2W4, P52735
3	GO:0048522	positive regulation of cellular process	Biological Process	25	Q9H5M4, Q09472, Q5TEC6, Q9BVP2, A0A087X1T2, P52735, Q75MX0, Q5JR08, Q96T88, P08581, P08582, B2R841, B2R4U3, B4DT46, P17096, A0A024R2W4, F1JVV5, B6CGU5, C9JCN8, A0A024RDF4, Q9Y6H1, F8VZJ2, B2R4N3, A0A024R8K7, A5YRV2
3	GO:0051240	positive regulation of multicellular organismal process	Biological Process	7	Q5JR08, Q09472, P08581, B4DT46, A0A024R2W4, F8VZJ2, F1JVV5
3	GO:0006807	nitrogen compound metabolic process	Biological Process	53	O95478, Q6DKI1, A0A0A0MTB0, Q5VV42, P62081, O43678, B5BU78, B2R823, Q96T88, H0UI22, P62273, A0A140VJE0, P07311, P82914, Q12872, A0A024RDF4, A0A097PY54, J3QR09, Q9Y6H1, Q6QN92, Q9NY93, F8VZJ2, P63173, P83881, A8K201, Q9H5M4, Q09472, Q13895, Q5TEC6, Q8NEF9, A0A087X1T2, Q9BVP2, Q9H9Y2, P08581, B2R841, B2R4U3, P17096, P62857, F1JVV5, Q96GA3, Q6FHK1, O75438, C9JCN8, Q8N4P8, Q8IY37, B3KS36, Q5JXX1, P62…
3	GO:0051707	response to other organism	Biological Process	5	Q5TEC6, P62861, A0A0A0MTB0, P17096, B4DT46
3	GO:0019222	regulation of metabolic process	Biological Process	30	Q9H5M4, Q09472, Q5TEC6, Q9BVP2, A0A087X1T2, P52735, A8KAQ3, Q5JR08, Q96T88, P08581, B2R841, P08582, B2R4U3, P17096, B4DT46, A0A024R2W4, B1ALI9, F1JVV5, B6CGU5, C9JCN8, Q12872, Q8N4P8, Q13823, A0A024RDF4, Q9Y6H1, F8VZJ2, Q6IAM0, A0A024R8K7, A5YRV2, A8K7D9
3	GO:0002253	activation of immune response	Biological Process	3	Q09472, B4DT46, P52735
3	GO:0098602	single organism cell adhesion	Biological Process	5	Q5JR08, Q8N4P8, P08582, A0A024R8K7, O15230
3	GO:0022402	cell cycle process	Biological Process	8	Q9H5M4, Q09472, Q5JR08, B2R841, A5YRV2, B2R4U3, D3DR37, O43805
3	GO:0009056	catabolic process	Biological Process	15	Q09472, J3QR09, P62081, B4DE48, Q6QN92, P62861, Q96T88, P63173, B2R841, B2R4U3, P62273, P83881, P62857, P62269, P07311
3	GO:1904951	positive regulation of establishment of protein localization	Biological Process	3	B2R4N3, Q5JR08, A0A087X1T2
3	GO:0016043	cellular component organization	Biological Process	44	Q9H5M4, Q09472, Q5TEC6, A0A087X1T2, Q9BVP2, P62081, O43678, P52735, A8KAQ3, Q75MX0, Q5JR08, Q96T88, P08581, Q6PJ25, B2R841, P08582, B2R4U3, P62273, P17096, B4DT46, D3DR37, P62857, A0A024R2W4, B4DYY3, F1JVV5, Q6FHK1, B6CGU5, P82914, O75438, Q12872, C9JCN8, Q14517, O15230, J3QR09, B0AZV9, Q5JXX1, B2R4N3, P62861, P63173, A0A024R8K7, P83881, A5YRV2, P62269, H3BMQ2
3	GO:0045927	positive regulation of growth	Biological Process	1	Q5TEC6
3	GO:0044085	cellular component biogenesis	Biological Process	39	O95478, Q9H5M4, Q13895, Q5TEC6, Q09472, Q6DKI1, P62081, O43678, P52735, Q9H9Y2, B2R823, Q5JR08, B2R841, P62273, B2R4U3, P17096, B4DT46, P62857, A0A024R2W4, B4DYY3, Q96GA3, Q6FHK1, P82914, O75438, Q12872, O15230, J3QR09, B0AZV9, Q8IY37, B3KS36, Q9NY93, Q9BVJ6, P62861, P63173, A0A024R8K7, P83881, H3BMQ2, P62269, A8K201
3	GO:0044237	cellular metabolic process	Biological Process	68	O95478, Q6DKI1, A0A0A0MTB0, Q5VV42, P62081, O43678, B5BU78, B2R823, Q5JR08, Q96T88, H0UI22, P62273, P53609, A0A140VJE0, P07311, B6CGU5, P82914, Q12872, Q92604, A0A024RDF4, A0A097PY54, J3QR09, B4DE67, Q2M2H8, Q9Y6H1, Q6QN92, Q9NY93, F8VZJ2, P63173, A0A024R8K7, P83881, B3KRC6, A8K201, O00767, Q9H5M4, Q09472, Q5TEC6, Q13895, Q8NEF9, A0A087X1T2, Q9BVP2, Q9H9Y2, P08581, B2R841, P08582, B2R4U3, P17096,…
3	GO:0009653	anatomical structure morphogenesis	Biological Process	12	Q9H5M4, Q09472, O75911, Q14517, O15230, Q75MX0, Q5JR08, P08581, A0A024R8K7, P08582, A0A024R2W4, B4DYY3
3	GO:0051234	establishment of localization	Biological Process	35	Q9H5M4, A0A087X1T2, A0A0A0MTB0, P62081, A6NLH6, P52735, A8KAQ3, Q5JR08, Q6PJ25, Q03169, B2R841, P08582, P62273, P17096, B4DT46, D3DR37, P62857, A0A024R2W4, Q86U90, B4DYY3, Q9HBR0, A0A024R7S3, O75438, A0A097PY54, A0A024RDF4, J3QR09, B0AZV9, D6RIZ4, B4DE48, B2R4N3, P62861, P63173, P83881, A8K7D9, P62269
3	GO:0045926	negative regulation of growth	Biological Process	1	Q75MX0
3	GO:0030155	regulation of cell adhesion	Biological Process	5	Q5JR08, Q8N4P8, P08582, A5YRV2, O15230
3	GO:0006914	autophagy	Biological Process	5	Q09472, Q5TEC6, Q9Y4B5, A0A087X1T2, A0A024R8K7
3	GO:0033036	macromolecule localization	Biological Process	23	Q9H5M4, A0A024R7S3, A0A087X1T2, Q9BVP2, A0A024RDF4, J3QR09, P62081, B4DE48, B2R4N3, Q5JR08, P62861, Q03169, P63173, Q6PJ25, B2R841, P62273, P83881, D3DR37, P62857, A0A024R2W4, A8K7D9, P62269, B4DYY3
3	GO:0050794	regulation of cellular process	Biological Process	45	Q9H5M4, Q09472, Q5TEC6, A0A087X1T2, Q9BVP2, Q8N5I2, P52735, A8KAQ3, Q75MX0, B5BU78, Q5JR08, Q96T88, P08581, Q6PJ25, P08582, B2R841, B2R4U3, P53609, P17096, B4DT46, A0A024R2W4, B1ALI9, B4DYY3, F1JVV5, F6TR53, B6CGU5, Q52LW3, C9JCN8, Q12872, Q8N4P8, Q14517, Q13823, O15230, A0A024RDF4, Q9Y6H1, B4DE48, Q9NY93, F8VZJ2, B2R4N3, Q9Y4B5, Q6IAM0, A0A024R8K7, A5YRV2, A8K7D9, D6RBD9
3	GO:0044089	positive regulation of cellular component biogenesis	Biological Process	2	Q5JR08, A0A024R2W4
3	GO:0003008	system process	Biological Process	2	O75911, B4DT46
3	GO:0051641	cellular localization	Biological Process	25	Q9H5M4, A0A087X1T2, Q9BVP2, P62081, A6NLH6, A8KAQ3, Q5JR08, B2R841, P62273, P17096, D3DR37, P62857, A0A024R2W4, B4DYY3, A0A024R7S3, A0A097PY54, J3QR09, B0AZV9, B4DE48, B2R4N3, P62861, P63173, P83881, A8K7D9, P62269
3	GO:0051241	negative regulation of multicellular organismal process	Biological Process	2	Q5JR08, Q75MX0
3	GO:0051051	negative regulation of transport	Biological Process	2	A0A087X1T2, Q86U90
3	GO:0065008	regulation of biological quality	Biological Process	21	B6CGU5, Q09472, Q5TEC6, O75911, Q8N4P8, A0A087X1T2, Q9BVP2, A0A024RDF4, P52735, Q75MX0, Q5JR08, P08581, B2R841, P08582, A0A024R8K7, B2R4U3, B4DT46, A0A024R2W4, A8K7D9, B4DYY3, D6RBD9
3	GO:0044419	interspecies interaction between organisms	Biological Process	15	Q09472, Q5TEC6, A0A0A0MTB0, J3QR09, P62081, Q6IAM0, P62861, P63173, P62273, P83881, P17096, P62857, A0A024R2W4, A8K7D9, P62269
3	GO:0044763	single-organism cellular process	Biological Process	65	A0A0A0MTB0, Q96EX3, P62081, O43678, B5BU78, Q5JR08, Q96T88, Q6PJ25, H0UI22, P62273, D3DR37, A0A140VJE0, B4DYY3, P07311, B6CGU5, Q52LW3, P82914, Q92604, A0A097PY54, A0A024RDF4, J3QR09, B4DE67, B0AZV9, Q2M2H8, Q6QN92, O43805, P63173, A0A024R8K7, P83881, B3KRC6, D6RBD9, O00767, Q9H5M4, Q09472, Q5TEC6, A0A087X1T2, P52735, A8KAQ3, Q75MX0, P08581, Q03169, P08582, B2R841, B2R4U3, P17096, B4DT46, A0A024R…
3	GO:0040012	regulation of locomotion	Biological Process	6	Q5JR08, Q8N4P8, P08581, O15230, A0A024R2W4, Q75MX0
3	GO:0007155	cell adhesion	Biological Process	8	Q5JR08, Q13895, Q14517, Q8N4P8, A0A024R8K7, P08582, O15230, A5YRV2
3	GO:0048856	anatomical structure development	Biological Process	26	Q9H5M4, Q09472, Q13895, A0A087X1T2, A0A0A0MTB0, P52735, A8KAQ3, Q75MX0, Q5JR08, Q96T88, P08581, Q6PJ25, P08582, A0A024R2W4, B1ALI9, B4DYY3, F1JVV5, B6CGU5, O00458, O75911, C9JCN8, Q14517, O15230, A0A024RDF4, F8VZJ2, A0A024R8K7
3	GO:0044703	multi-organism reproductive process	Biological Process	1	Q13895
3	GO:0048583	regulation of response to stimulus	Biological Process	15	B6CGU5, Q9H5M4, Q52LW3, Q5TEC6, Q09472, P52735, Q9Y6H1, Q75MX0, Q5JR08, P08581, A5YRV2, B2R4U3, B4DT46, P17096, A0A024R2W4
3	GO:0044087	regulation of cellular component biogenesis	Biological Process	4	Q5JR08, Q5TEC6, B2R841, A0A024R2W4
3	GO:0010884	positive regulation of lipid storage	Biological Process	1	A0A087X1T2
3	GO:0044700	single organism signaling	Biological Process	22	B6CGU5, Q9H5M4, Q52LW3, Q09472, C9JCN8, Q14517, O15230, P52735, B4DE48, A8KAQ3, Q75MX0, Q5JR08, P08581, B2R841, A0A024R8K7, B2R4U3, A5YRV2, B4DT46, P17096, A0A024R2W4, B4DYY3, F1JVV5
3	GO:0032846	positive regulation of homeostatic process	Biological Process	1	Q9BVP2
3	GO:0045785	positive regulation of cell adhesion	Biological Process	1	Q5JR08
3	GO:0044710	single-organism metabolic process	Biological Process	23	O00767, Q9H5M4, Q09472, O75438, O75911, Q92604, A0A087X1T2, A0A097PY54, A0A0A0MTB0, B4DE67, O43678, B4DE48, Q6QN92, B5BU78, P08581, H0UI22, B2R841, A5YRV2, B4DT46, B3KRC6, A0A140VJE0, A0A024R2W4, P07311
3	GO:0048523	negative regulation of cellular process	Biological Process	22	B6CGU5, Q5TEC6, Q09472, C9JCN8, Q8N4P8, A0A087X1T2, A0A024RDF4, A8KAQ3, Q75MX0, F8VZJ2, Q5JR08, Q96T88, P08581, B2R841, P08582, A0A024R8K7, B2R4U3, A5YRV2, P17096, A0A024R2W4, B1ALI9, F1JVV5
3	GO:0009605	response to external stimulus	Biological Process	11	Q5TEC6, Q5JR08, P62861, C9JCN8, P08581, A0A087X1T2, A0A0A0MTB0, P17096, B4DT46, P52735, Q75MX0
3	GO:1902578	single-organism localization	Biological Process	21	O75438, A0A087X1T2, A0A097PY54, J3QR09, P62081, P52735, D6RIZ4, A8KAQ3, P62861, P63173, Q6PJ25, Q03169, P62273, P83881, B4DT46, P62857, A0A024R2W4, A8K7D9, P62269, Q9HBR0, B4DYY3
3	GO:0051050	positive regulation of transport	Biological Process	4	B2R4N3, Q5JR08, A0A087X1T2, B4DT46
3	GO:0044707	single-multicellular organism process	Biological Process	29	Q09472, Q13895, Q5TEC6, A0A087X1T2, A0A0A0MTB0, P52735, A8KAQ3, Q75MX0, B5BU78, Q5JR08, Q96T88, P08581, Q6PJ25, B4DT46, A0A024R2W4, B1ALI9, B4DYY3, F1JVV5, B6CGU5, O75911, C9JCN8, Q14517, Q8N4P8, O15230, A0A024RDF4, B4DE67, Q2M2H8, F8VZJ2, A0A024R8K7
3	GO:0044033	multi-organism metabolic process	Biological Process	10	Q09472, Q6IAM0, P62861, P63173, P62273, P83881, J3QR09, P62081, P62857, P62269
3	GO:0044702	single organism reproductive process	Biological Process	1	B2R841
3	GO:0035821	modification of morphology or physiology of other organism	Biological Process	3	Q09472, A0A024R2W4, A8K7D9
3	GO:0042221	response to chemical	Biological Process	16	B6CGU5, Q09472, Q13895, C9JCN8, A0A087X1T2, A0A024RDF4, D6RIZ4, Q9Y6H1, A8KAQ3, Q75MX0, Q5JR08, P08581, A0A024R8K7, B4DT46, B1ALI9, F1JVV5
3	GO:0040008	regulation of growth	Biological Process	3	Q5TEC6, P08582, Q75MX0
3	GO:1902579	multi-organism localization	Biological Process	1	A8K7D9
3	GO:0023056	positive regulation of signaling	Biological Process	4	Q9H5M4, Q5JR08, P08581, B4DT46
3	GO:0023057	negative regulation of signaling	Biological Process	2	A5YRV2, A0A024R2W4
3	GO:0006950	response to stress	Biological Process	18	B6CGU5, Q5TEC6, Q09472, C9JCN8, A0A087X1T2, A0A0A0MTB0, P52735, Q9Y6H1, Q5JXX1, Q5JR08, P62861, P08581, B2R841, A0A024R8K7, A5YRV2, B2R4U3, B4DT46, P17096
3	GO:0009607	response to biotic stimulus	Biological Process	6	Q5TEC6, P62861, A0A0A0MTB0, P17096, B4DT46, B1ALI9
3	GO:0044767	single-organism developmental process	Biological Process	28	Q9H5M4, Q09472, Q13895, A0A087X1T2, A0A0A0MTB0, P52735, A8KAQ3, Q75MX0, Q5JR08, Q96T88, P08581, Q6PJ25, P08582, P17096, A0A024R2W4, B1ALI9, B4DYY3, F1JVV5, B6CGU5, O00458, O75911, C9JCN8, Q14517, Q8N4P8, O15230, A0A024RDF4, F8VZJ2, A0A024R8K7
3	GO:0071704	organic substance metabolic process	Biological Process	70	O95478, Q6DKI1, A0A0A0MTB0, Q5VV42, P62081, O43678, B5BU78, B2R823, Q5JR08, Q96T88, H0UI22, P62273, P53609, A0A140VJE0, P07311, B6CGU5, P82914, Q12872, Q92604, A0A024RDF4, A0A097PY54, J3QR09, B4DE67, Q2M2H8, Q9Y6H1, Q6QN92, Q9NY93, F8VZJ2, P63173, A0A024R8K7, P83881, B3KRC6, A8K201, O00767, Q9H5M4, Q09472, Q5TEC6, Q13895, Q8NEF9, A0A087X1T2, Q9BVP2, P52735, A8KAQ3, Q9H9Y2, P08581, B2R841, P08582,…
4	GO:0032101	regulation of response to external stimulus	Biological Process	5	Q5TEC6, P08581, B4DT46, P52735, Q75MX0
4	GO:0030308	negative regulation of cell growth	Biological Process	1	Q75MX0
4	GO:0045730	respiratory burst	Biological Process	1	B4DT46
4	GO:0007059	chromosome segregation	Biological Process	2	B2R841, D3DR37
4	GO:0060969	negative regulation of gene silencing	Biological Process	1	P17096
4	GO:0002697	regulation of immune effector process	Biological Process	1	Q5TEC6
4	GO:0031323	regulation of cellular metabolic process	Biological Process	27	Q9H5M4, Q09472, Q5TEC6, Q9BVP2, A0A087X1T2, Q5JR08, Q96T88, P08581, B2R841, P08582, B2R4U3, P17096, B4DT46, A0A024R2W4, F1JVV5, B6CGU5, C9JCN8, Q12872, Q8N4P8, Q13823, A0A024RDF4, Q9Y6H1, F8VZJ2, Q6IAM0, A0A024R8K7, A5YRV2, A8K7D9
4	GO:0048871	multicellular organismal homeostasis	Biological Process	1	B4DYY3
4	GO:0006790	sulfur compound metabolic process	Biological Process	1	O00767
4	GO:0032940	secretion by cell	Biological Process	1	Q03169
4	GO:0000075	cell cycle checkpoint	Biological Process	3	Q09472, B2R841, A5YRV2
4	GO:0001775	cell activation	Biological Process	2	Q5JR08, P52735
4	GO:0050878	regulation of body fluid levels	Biological Process	3	Q5TEC6, Q5JR08, P52735
4	GO:0032886	regulation of microtubule-based process	Biological Process	1	B2R841
4	GO:0090343	positive regulation of cell aging	Biological Process	1	P17096
4	GO:0044712	single-organism catabolic process	Biological Process	4	Q09472, B4DE48, Q6QN92, P07311
4	GO:0044403	symbiosis, encompassing mutualism through parasitism	Biological Process	15	Q09472, Q5TEC6, A0A0A0MTB0, J3QR09, P62081, Q6IAM0, P62861, P63173, P62273, P83881, P17096, P62857, A0A024R2W4, A8K7D9, P62269
4	GO:0060491	regulation of cell projection assembly	Biological Process	1	Q5JR08
4	GO:0001558	regulation of cell growth	Biological Process	3	Q5TEC6, P08582, Q75MX0
4	GO:0045494	photoreceptor cell maintenance	Biological Process	1	B4DYY3
4	GO:0042592	homeostatic process	Biological Process	7	Q5TEC6, Q9BVP2, P08582, B2R4U3, B4DT46, B4DYY3, D6RBD9
4	GO:1900426	positive regulation of defense response to bacterium	Biological Process	1	B4DT46
4	GO:0010993	regulation of ubiquitin homeostasis	Biological Process	1	B2R4U3
4	GO:0050778	positive regulation of immune response	Biological Process	3	Q09472, B4DT46, P52735
4	GO:0045185	maintenance of protein location	Biological Process	1	A0A024R2W4
4	GO:0051781	positive regulation of cell division	Biological Process	1	Q5JR08
4	GO:0032506	cytokinetic process	Biological Process	1	Q5JR08
4	GO:0045184	establishment of protein localization	Biological Process	18	A0A024R7S3, A0A087X1T2, J3QR09, P62081, B4DE48, B2R4N3, Q5JR08, P62861, P63173, B2R841, P62273, P83881, D3DR37, P62857, A0A024R2W4, A8K7D9, P62269, B4DYY3
4	GO:0032989	cellular component morphogenesis	Biological Process	8	Q9H5M4, Q5JR08, P08581, P08582, O15230, A0A024R2W4, B4DYY3, Q75MX0
4	GO:0010648	negative regulation of cell communication	Biological Process	2	A5YRV2, A0A024R2W4
4	GO:0051270	regulation of cellular component movement	Biological Process	6	Q5JR08, Q8N4P8, P08581, O15230, A0A024R2W4, Q75MX0
4	GO:0044770	cell cycle phase transition	Biological Process	5	Q09472, B2R841, A5YRV2, B2R4U3, O43805
4	GO:0051961	negative regulation of nervous system development	Biological Process	2	Q5JR08, Q75MX0
4	GO:1901203	positive regulation of extracellular matrix assembly	Biological Process	1	A0A024R2W4
4	GO:1902581	multi-organism cellular localization	Biological Process	1	A8K7D9
4	GO:0010646	regulation of cell communication	Biological Process	11	B6CGU5, Q9H5M4, Q52LW3, Q5JR08, Q09472, P08581, B2R841, A5YRV2, B4DT46, A0A024R2W4, P52735
4	GO:0002757	immune response-activating signal transduction	Biological Process	3	Q09472, B4DT46, P52735
4	GO:0051817	modification of morphology or physiology of other organism involved in symbiotic interaction	Biological Process	3	Q09472, A0A024R2W4, A8K7D9
4	GO:1901201	regulation of extracellular matrix assembly	Biological Process	1	A0A024R2W4
4	GO:0016477	cell migration	Biological Process	9	Q5JR08, Q8N4P8, P08581, Q14517, A0A024R8K7, O15230, A0A024R2W4, Q75MX0, B5BU78
4	GO:0071214	cellular response to abiotic stimulus	Biological Process	2	Q5JR08, Q09472
4	GO:0080090	regulation of primary metabolic process	Biological Process	25	Q9H5M4, Q09472, Q5TEC6, Q9BVP2, A0A087X1T2, Q5JR08, Q96T88, P08581, B2R841, P08582, B2R4U3, P17096, A0A024R2W4, F1JVV5, B6CGU5, C9JCN8, Q12872, Q8N4P8, Q13823, A0A024RDF4, Q9Y6H1, F8VZJ2, Q6IAM0, A5YRV2, A8K7D9
4	GO:0051962	positive regulation of nervous system development	Biological Process	1	Q5JR08
4	GO:0007507	heart development	Biological Process	1	F8VZJ2
4	GO:0006952	defense response	Biological Process	5	Q09472, Q5TEC6, P62861, A0A0A0MTB0, B4DT46
4	GO:1904816	positive regulation of protein localization to chromosome, telomeric region	Biological Process	1	Q9BVP2
4	GO:0007015	actin filament organization	Biological Process	1	Q5JR08
4	GO:0033554	cellular response to stress	Biological Process	12	Q09472, Q5TEC6, Q5JR08, C9JCN8, P08581, A0A087X1T2, B2R841, A5YRV2, B2R4U3, P17096, Q9Y6H1, Q5JXX1
4	GO:0022613	ribonucleoprotein complex biogenesis	Biological Process	23	O95478, Q13895, P82914, Q12872, Q6DKI1, J3QR09, P62081, Q8IY37, B3KS36, Q9NY93, Q9H9Y2, B2R823, Q9BVJ6, P62861, P63173, P62273, P83881, P62857, P62269, A8K201, H3BMQ2, Q96GA3, Q6FHK1
4	GO:0051985	negative regulation of chromosome segregation	Biological Process	1	B2R841
4	GO:0098813	nuclear chromosome segregation	Biological Process	2	B2R841, D3DR37
4	GO:0022900	electron transport chain	Biological Process	2	O75438, O43678
4	GO:0009314	response to radiation	Biological Process	2	Q5JR08, Q09472
4	GO:0048588	developmental cell growth	Biological Process	1	Q75MX0
4	GO:1903409	reactive oxygen species biosynthetic process	Biological Process	1	B4DT46
4	GO:0010605	negative regulation of macromolecule metabolic process	Biological Process	13	Q5TEC6, Q09472, C9JCN8, Q8N4P8, A0A087X1T2, A0A024RDF4, Q96T88, B2R841, A5YRV2, B2R4U3, P17096, A0A024R2W4, F1JVV5
4	GO:1901135	carbohydrate derivative metabolic process	Biological Process	7	O75438, A5YRV2, A0A097PY54, A0A024R2W4, O43678, A0A140VJE0, P07311
4	GO:0051651	maintenance of location in cell	Biological Process	1	A0A024R2W4
4	GO:0010876	lipid localization	Biological Process	2	Q6PJ25, A0A087X1T2
4	GO:0051324	prophase	Biological Process	1	B2R841
4	GO:0044281	small molecule metabolic process	Biological Process	16	O00767, Q9H5M4, Q09472, O75438, O75911, A0A097PY54, B4DE67, O43678, B4DE48, Q6QN92, B5BU78, H0UI22, B2R841, B3KRC6, A0A140VJE0, P07311
4	GO:0032535	regulation of cellular component size	Biological Process	2	P52735, Q75MX0
4	GO:0048524	positive regulation of viral process	Biological Process	1	Q09472
4	GO:0006928	movement of cell or subcellular component	Biological Process	9	Q5JR08, Q14517, Q8N4P8, P08581, A0A024R8K7, O15230, A0A024R2W4, Q75MX0, B5BU78
4	GO:0002833	positive regulation of response to biotic stimulus	Biological Process	1	B4DT46
4	GO:0010810	regulation of cell-substrate adhesion	Biological Process	2	Q5JR08, P08582
4	GO:0055114	oxidation-reduction process	Biological Process	5	O00767, O75438, B4DT46, O43678, B3KRC6
4	GO:0006629	lipid metabolic process	Biological Process	8	O00767, O75911, Q92604, A0A087X1T2, A0A0A0MTB0, B4DE67, B3KRC6, B4DE48
4	GO:0070887	cellular response to chemical stimulus	Biological Process	10	Q09472, Q13895, Q5JR08, C9JCN8, P08581, A0A024RDF4, B4DT46, Q9Y6H1, A8KAQ3, F1JVV5
4	GO:1901576	organic substance biosynthetic process	Biological Process	38	O00767, Q09472, Q5TEC6, Q9BVP2, A0A087X1T2, Q6DKI1, P62081, Q96T88, P08581, B2R841, H0UI22, P62273, P17096, A0A140VJE0, P62857, A0A024R2W4, P07311, F1JVV5, Q6FHK1, P82914, O75438, C9JCN8, Q92604, Q8N4P8, A0A024RDF4, A0A097PY54, J3QR09, B4DE67, Q9Y6H1, B3KS36, F8VZJ2, Q6IAM0, P62861, P63173, A5YRV2, P83881, B3KRC6, P62269
4	GO:0006903	vesicle targeting	Biological Process	1	B0AZV9
4	GO:0051090	regulation of sequence-specific DNA binding transcription factor activity	Biological Process	1	Q09472
4	GO:0010604	positive regulation of macromolecule metabolic process	Biological Process	18	B6CGU5, Q9H5M4, Q09472, Q5TEC6, C9JCN8, Q9BVP2, A0A087X1T2, A0A024RDF4, Q9Y6H1, Q5JR08, Q96T88, P08581, P08582, B2R841, A5YRV2, B2R4U3, P17096, F1JVV5
4	GO:0032103	positive regulation of response to external stimulus	Biological Process	2	P08581, B4DT46
4	GO:0007165	signal transduction	Biological Process	21	B6CGU5, Q9H5M4, Q52LW3, Q09472, C9JCN8, O15230, P52735, B4DE48, A8KAQ3, Q75MX0, Q5JR08, P08581, B2R841, A0A024R8K7, A5YRV2, B2R4U3, B4DT46, P17096, A0A024R2W4, B4DYY3, F1JVV5
4	GO:0007420	brain development	Biological Process	1	Q5JR08
4	GO:0051782	negative regulation of cell division	Biological Process	1	B1ALI9
4	GO:0035295	tube development	Biological Process	3	Q5JR08, P08581, A0A024R8K7
4	GO:2000774	positive regulation of cellular senescence	Biological Process	1	P17096
4	GO:0055094	response to lipoprotein particle	Biological Process	1	A0A087X1T2
4	GO:0030030	cell projection organization	Biological Process	6	Q9H5M4, Q5JR08, O15230, P52735, B4DYY3, Q75MX0
4	GO:1900182	positive regulation of protein localization to nucleus	Biological Process	1	B2R841
4	GO:0051301	cell division	Biological Process	4	Q5JR08, B2R841, D3DR37, B1ALI9
4	GO:0071216	cellular response to biotic stimulus	Biological Process	1	B1ALI9
4	GO:0060322	head development	Biological Process	1	Q5JR08
4	GO:0015980	energy derivation by oxidation of organic compounds	Biological Process	2	O75438, O43678
4	GO:0019725	cellular homeostasis	Biological Process	3	B2R4U3, B4DT46, D6RBD9
4	GO:0007154	cell communication	Biological Process	23	B6CGU5, Q9H5M4, Q52LW3, Q09472, C9JCN8, Q14517, A0A087X1T2, O15230, P52735, B4DE48, A8KAQ3, Q75MX0, Q5JR08, P08581, B2R841, A0A024R8K7, B2R4U3, A5YRV2, B4DT46, P17096, A0A024R2W4, B4DYY3, F1JVV5
4	GO:0051173	positive regulation of nitrogen compound metabolic process	Biological Process	11	Q09472, C9JCN8, Q96T88, P08581, Q9BVP2, A0A087X1T2, A5YRV2, A0A024RDF4, P17096, Q9Y6H1, F1JVV5
4	GO:0016337	single organismal cell-cell adhesion	Biological Process	1	Q8N4P8
4	GO:2000026	regulation of multicellular organismal development	Biological Process	5	Q5JR08, O15230, A0A024R2W4, Q75MX0, F8VZJ2
4	GO:1901700	response to oxygen-containing compound	Biological Process	8	Q09472, Q5JR08, C9JCN8, P08581, A0A087X1T2, B4DT46, B1ALI9, A8KAQ3
4	GO:0042493	response to drug	Biological Process	2	D6RIZ4, Q75MX0
4	GO:0016236	macroautophagy	Biological Process	1	Q5TEC6
4	GO:0034123	positive regulation of toll-like receptor signaling pathway	Biological Process	1	B4DT46
4	GO:0019538	protein metabolic process	Biological Process	33	Q9H5M4, Q09472, Q5TEC6, Q9BVP2, Q6DKI1, P62081, B5BU78, Q5JR08, Q96T88, P08581, B2R841, P08582, H0UI22, B2R4U3, P62273, P53609, P62857, A0A024R2W4, Q6FHK1, B6CGU5, P82914, Q8N4P8, A0A024RDF4, J3QR09, B3KS36, Q5JXX1, F8VZJ2, Q6IAM0, P62861, P63173, A5YRV2, P83881, P62269
4	GO:2000146	negative regulation of cell motility	Biological Process	3	Q5JR08, Q8N4P8, A0A024R2W4
4	GO:0048731	system development	Biological Process	18	B6CGU5, Q09472, O75911, C9JCN8, Q14517, O15230, A0A024RDF4, A0A0A0MTB0, P52735, Q75MX0, F8VZJ2, Q5JR08, P08581, Q6PJ25, A0A024R8K7, A0A024R2W4, B1ALI9, F1JVV5
4	GO:0009615	response to virus	Biological Process	3	Q5TEC6, A0A0A0MTB0, P17096
4	GO:0019884	antigen processing and presentation of exogenous antigen	Biological Process	1	B4DT46
4	GO:0046907	intracellular transport	Biological Process	20	A0A024R7S3, A0A087X1T2, A0A097PY54, J3QR09, P62081, B0AZV9, A6NLH6, B4DE48, A8KAQ3, B2R4N3, Q5JR08, P62861, P63173, P62273, P83881, P17096, P62857, A0A024R2W4, A8K7D9, P62269
4	GO:0055086	nucleobase-containing small molecule metabolic process	Biological Process	5	O75438, A0A097PY54, O43678, A0A140VJE0, P07311
4	GO:0007267	cell-cell signaling	Biological Process	3	Q9H5M4, Q5JR08, Q14517
4	GO:0002218	activation of innate immune response	Biological Process	2	Q09472, B4DT46
4	GO:0045807	positive regulation of endocytosis	Biological Process	1	B4DT46
4	GO:0051983	regulation of chromosome segregation	Biological Process	1	B2R841
4	GO:0045786	negative regulation of cell cycle	Biological Process	3	Q09472, B2R841, A5YRV2
4	GO:0030029	actin filament-based process	Biological Process	1	Q5JR08
4	GO:0060627	regulation of vesicle-mediated transport	Biological Process	1	B4DT46
4	GO:0010506	regulation of autophagy	Biological Process	3	Q09472, Q9Y4B5, A0A087X1T2
4	GO:0050920	regulation of chemotaxis	Biological Process	2	P08581, Q75MX0
4	GO:0060255	regulation of macromolecule metabolic process	Biological Process	28	Q9H5M4, Q09472, Q5TEC6, Q9BVP2, A0A087X1T2, P52735, A8KAQ3, Q5JR08, Q96T88, P08581, B2R841, P08582, B2R4U3, P17096, A0A024R2W4, F1JVV5, B6CGU5, C9JCN8, Q12872, Q8N4P8, Q13823, A0A024RDF4, Q9Y6H1, F8VZJ2, Q6IAM0, A0A024R8K7, A5YRV2, A8K7D9
4	GO:0051322	anaphase	Biological Process	2	B2R841, B2R4U3
4	GO:0033628	regulation of cell adhesion mediated by integrin	Biological Process	1	A5YRV2
4	GO:0019080	viral gene expression	Biological Process	10	Q09472, Q6IAM0, P62861, P63173, P62273, P83881, J3QR09, P62081, P62857, P62269
4	GO:0042180	cellular ketone metabolic process	Biological Process	1	O75438
4	GO:0050877	neurological system process	Biological Process	1	O75911
4	GO:0097167	circadian regulation of translation	Biological Process	1	A0A024RDF4
4	GO:0010256	endomembrane system organization	Biological Process	3	Q9H5M4, B2R841, B4DYY3
4	GO:0045596	negative regulation of cell differentiation	Biological Process	3	Q5JR08, P08582, Q75MX0
4	GO:0051186	cofactor metabolic process	Biological Process	3	O00767, O75438, P07311
4	GO:0031589	cell-substrate adhesion	Biological Process	4	Q5JR08, A0A024R8K7, P08582, O15230
4	GO:0006486	protein glycosylation	Biological Process	2	A5YRV2, A0A024R2W4
4	GO:0010033	response to organic substance	Biological Process	11	B6CGU5, Q13895, Q09472, Q5JR08, C9JCN8, P08581, A0A087X1T2, A0A024RDF4, B4DT46, A8KAQ3, F1JVV5
4	GO:0009891	positive regulation of biosynthetic process	Biological Process	12	Q09472, C9JCN8, Q9BVP2, A0A087X1T2, A0A024RDF4, Q9Y6H1, Q96T88, P08581, A5YRV2, B4DT46, P17096, F1JVV5
4	GO:0022407	regulation of cell-cell adhesion	Biological Process	1	Q8N4P8
4	GO:0051304	chromosome separation	Biological Process	1	B2R841
4	GO:0031668	cellular response to extracellular stimulus	Biological Process	1	A0A087X1T2
4	GO:0051171	regulation of nitrogen compound metabolic process	Biological Process	19	Q09472, Q5TEC6, C9JCN8, Q12872, Q8N4P8, Q9BVP2, A0A087X1T2, A0A024RDF4, Q9Y6H1, F8VZJ2, Q96T88, Q6IAM0, P08581, B2R841, B2R4U3, A5YRV2, P17096, A8K7D9, F1JVV5
4	GO:0045454	cell redox homeostasis	Biological Process	2	B4DT46, D6RBD9
4	GO:0001704	formation of primary germ layer	Biological Process	1	A0A024R8K7
4	GO:0060548	negative regulation of cell death	Biological Process	4	Q09472, P08581, B2R841, A5YRV2
4	GO:0048598	embryonic morphogenesis	Biological Process	2	A0A024R8K7, A0A024R2W4
4	GO:0050790	regulation of catalytic activity	Biological Process	9	B6CGU5, Q5JR08, Q96T88, P08581, Q8N4P8, B2R841, B2R4U3, P52735, A8KAQ3
4	GO:0043254	regulation of protein complex assembly	Biological Process	1	Q5TEC6
4	GO:0007062	sister chromatid cohesion	Biological Process	1	B2R841
4	GO:0051656	establishment of organelle localization	Biological Process	2	B0AZV9, D3DR37
4	GO:1903749	positive regulation of establishment of protein localization to mitochondrion	Biological Process	2	B2R4N3, A0A087X1T2
4	GO:0019915	lipid storage	Biological Process	1	A0A087X1T2
4	GO:0001666	response to hypoxia	Biological Process	2	Q09472, Q9Y6H1
4	GO:0071559	response to transforming growth factor beta	Biological Process	1	Q5JR08
4	GO:0009890	negative regulation of biosynthetic process	Biological Process	8	Q09472, Q5TEC6, Q96T88, Q8N4P8, B2R841, A0A087X1T2, A5YRV2, P17096
4	GO:0040019	positive regulation of embryonic development	Biological Process	1	A0A024R2W4
4	GO:0002831	regulation of response to biotic stimulus	Biological Process	2	Q5TEC6, B4DT46
4	GO:0007017	microtubule-based process	Biological Process	4	Q9H5M4, Q5JR08, B2R841, A0A024R2W4
4	GO:0032233	positive regulation of actin filament bundle assembly	Biological Process	1	Q5JR08
4	GO:0061024	membrane organization	Biological Process	13	J3QR09, B0AZV9, P62081, Q5JR08, P62861, P63173, Q6PJ25, B2R841, P62273, P83881, P62857, P62269, B4DYY3
4	GO:0051222	positive regulation of protein transport	Biological Process	3	B2R4N3, Q5JR08, A0A087X1T2
4	GO:0010886	positive regulation of cholesterol storage	Biological Process	1	A0A087X1T2
4	GO:0006959	humoral immune response	Biological Process	1	P62861
4	GO:0030307	positive regulation of cell growth	Biological Process	1	Q5TEC6
4	GO:1903047	mitotic cell cycle process	Biological Process	8	Q9H5M4, Q09472, Q5JR08, B2R841, A5YRV2, B2R4U3, D3DR37, O43805
4	GO:0051271	negative regulation of cellular component movement	Biological Process	4	Q5JR08, Q8N4P8, A0A024R2W4, Q75MX0
4	GO:1902589	single-organism organelle organization	Biological Process	8	Q9H5M4, Q5JR08, Q14517, B2R841, A0A087X1T2, D3DR37, A0A024R2W4, B4DYY3
4	GO:0048869	cellular developmental process	Biological Process	18	B6CGU5, O00458, Q9H5M4, Q09472, C9JCN8, Q8N4P8, O15230, A8KAQ3, Q75MX0, Q5JR08, P08581, A0A024R8K7, P08582, P17096, A0A024R2W4, B1ALI9, B4DYY3, F1JVV5
4	GO:0090316	positive regulation of intracellular protein transport	Biological Process	3	B2R4N3, Q5JR08, A0A087X1T2
4	GO:0090130	tissue migration	Biological Process	3	Q5JR08, P08581, B5BU78
4	GO:0023014	signal transduction by protein phosphorylation	Biological Process	2	P08581, A0A024R2W4
4	GO:0010634	positive regulation of epithelial cell migration	Biological Process	2	Q5JR08, P08581
4	GO:1901564	organonitrogen compound metabolic process	Biological Process	27	Q9H5M4, Q09472, Q6DKI1, A0A0A0MTB0, P62081, O43678, B5BU78, H0UI22, B2R841, P62273, P62857, A0A140VJE0, P07311, Q6FHK1, P82914, O75438, A0A024RDF4, A0A097PY54, J3QR09, Q6QN92, B3KS36, F8VZJ2, P62861, Q6IAM0, P63173, P83881, P62269
4	GO:0050776	regulation of immune response	Biological Process	3	Q09472, B4DT46, P52735
4	GO:0009888	tissue development	Biological Process	9	Q5JR08, P08581, Q14517, A0A024R8K7, O15230, A0A024R2W4, B1ALI9, F8VZJ2, Q75MX0
4	GO:0006082	organic acid metabolic process	Biological Process	10	O00767, Q9H5M4, Q09472, H0UI22, B2R841, B4DE67, B3KRC6, Q6QN92, P07311, B5BU78
4	GO:0010243	response to organonitrogen compound	Biological Process	1	A8KAQ3
4	GO:0043062	extracellular structure organization	Biological Process	4	A0A024R8K7, P08582, O15230, A0A024R2W4
4	GO:0019730	antimicrobial humoral response	Biological Process	1	P62861
4	GO:0009889	regulation of biosynthetic process	Biological Process	17	Q09472, Q5TEC6, C9JCN8, Q8N4P8, Q9BVP2, A0A087X1T2, A0A024RDF4, Q9Y6H1, F8VZJ2, Q6IAM0, Q96T88, P08581, B2R841, A5YRV2, P17096, B4DT46, F1JVV5
4	GO:1901575	organic substance catabolic process	Biological Process	15	Q09472, J3QR09, P62081, B4DE48, Q6QN92, P62861, Q96T88, P63173, B2R841, B2R4U3, P62273, P83881, P62857, P62269, P07311
4	GO:0009887	animal organ morphogenesis	Biological Process	4	Q5JR08, O75911, A0A024R8K7, O15230
4	GO:0048468	cell development	Biological Process	5	Q5JR08, P08581, P08582, O15230, Q75MX0
4	GO:0000422	mitophagy	Biological Process	1	A0A087X1T2
4	GO:0051649	establishment of localization in cell	Biological Process	21	A0A024R7S3, A0A087X1T2, A0A097PY54, J3QR09, P62081, B0AZV9, A6NLH6, B4DE48, A8KAQ3, B2R4N3, Q5JR08, P62861, P63173, P62273, P83881, P17096, D3DR37, P62857, A0A024R2W4, A8K7D9, P62269
4	GO:0032970	regulation of actin filament-based process	Biological Process	1	Q5JR08
4	GO:0051236	establishment of RNA localization	Biological Process	1	A0A024RDF4
4	GO:0061061	muscle structure development	Biological Process	3	O00458, A8KAQ3, F8VZJ2
4	GO:1900408	negative regulation of cellular response to oxidative stress	Biological Process	1	P08581
4	GO:0045595	regulation of cell differentiation	Biological Process	5	Q5JR08, P08582, A0A024R2W4, Q75MX0, F1JVV5
4	GO:0010564	regulation of cell cycle process	Biological Process	5	Q09472, Q5JR08, B2R841, A5YRV2, B2R4U3
4	GO:0071496	cellular response to external stimulus	Biological Process	1	A0A087X1T2
4	GO:0034754	cellular hormone metabolic process	Biological Process	1	O75911
4	GO:0002433	immune response-regulating cell surface receptor signaling pathway involved in phagocytosis	Biological Process	1	P52735
4	GO:0009408	response to heat	Biological Process	1	Q09472
4	GO:0010647	positive regulation of cell communication	Biological Process	4	Q9H5M4, Q5JR08, P08581, B4DT46
4	GO:0006520	cellular amino acid metabolic process	Biological Process	3	Q09472, H0UI22, Q6QN92
4	GO:1901861	regulation of muscle tissue development	Biological Process	1	F8VZJ2
4	GO:0051272	positive regulation of cellular component movement	Biological Process	3	Q5JR08, P08581, Q75MX0
4	GO:0007272	ensheathment of neurons	Biological Process	1	A0A0A0MTB0
4	GO:0044249	cellular biosynthetic process	Biological Process	36	O00767, Q09472, Q5TEC6, Q9BVP2, A0A087X1T2, Q6DKI1, P62081, Q96T88, P08581, B2R841, H0UI22, P62273, P17096, A0A140VJE0, P62857, A0A024R2W4, F1JVV5, Q6FHK1, P82914, O75438, C9JCN8, Q92604, Q8N4P8, A0A024RDF4, A0A097PY54, J3QR09, B4DE67, Q9Y6H1, B3KS36, F8VZJ2, Q6IAM0, P62861, P63173, A5YRV2, P83881, P62269
4	GO:0051049	regulation of transport	Biological Process	5	B2R4N3, Q5JR08, A0A087X1T2, B4DT46, Q86U90
4	GO:0031647	regulation of protein stability	Biological Process	2	Q8N4P8, B2R841
4	GO:0001503	ossification	Biological Process	1	Q8N4P8
4	GO:0032231	regulation of actin filament bundle assembly	Biological Process	1	Q5JR08
4	GO:2000145	regulation of cell motility	Biological Process	6	Q5JR08, Q8N4P8, P08581, O15230, A0A024R2W4, Q75MX0
4	GO:0009611	response to wounding	Biological Process	4	Q5TEC6, Q5JR08, A0A024R8K7, P52735
4	GO:0051640	organelle localization	Biological Process	2	B0AZV9, D3DR37
4	GO:0044093	positive regulation of molecular function	Biological Process	7	B6CGU5, Q5JR08, Q09472, Q96T88, P08581, B2R841, B2R4U3
4	GO:0044255	cellular lipid metabolic process	Biological Process	5	O00767, O75911, Q92604, A0A0A0MTB0, B3KRC6
4	GO:1902883	negative regulation of response to oxidative stress	Biological Process	1	P08581
4	GO:0000279	M phase	Biological Process	2	B2R841, B2R4U3
4	GO:0007568	aging	Biological Process	1	P17096
4	GO:0008104	protein localization	Biological Process	21	Q9H5M4, A0A024R7S3, A0A087X1T2, Q9BVP2, J3QR09, P62081, B4DE48, B2R4N3, Q5JR08, P62861, P63173, Q03169, B2R841, P62273, P83881, D3DR37, P62857, A0A024R2W4, A8K7D9, P62269, B4DYY3
4	GO:0051098	regulation of binding	Biological Process	3	Q9H5M4, Q8N4P8, B2R841
4	GO:0022603	regulation of anatomical structure morphogenesis	Biological Process	5	Q5JR08, Q09472, P08582, A0A024R2W4, Q75MX0
4	GO:0098763	mitotic cell cycle phase	Biological Process	2	B2R841, B2R4U3
4	GO:0009725	response to hormone	Biological Process	2	Q09472, A8KAQ3
4	GO:0008285	negative regulation of cell proliferation	Biological Process	2	Q8N4P8, P17096
4	GO:0009894	regulation of catabolic process	Biological Process	2	B2R841, B2R4U3
4	GO:0043207	response to external biotic stimulus	Biological Process	5	Q5TEC6, P62861, A0A0A0MTB0, P17096, B4DT46
4	GO:0043903	regulation of symbiosis, encompassing mutualism through parasitism	Biological Process	2	Q09472, Q5TEC6
4	GO:0009617	response to bacterium	Biological Process	2	P62861, B4DT46
4	GO:0006725	cellular aromatic compound metabolic process	Biological Process	47	O95478, Q09472, Q5TEC6, Q13895, Q8NEF9, Q9BVP2, A0A087X1T2, Q6DKI1, Q5VV42, P62081, O43678, B5BU78, Q9H9Y2, B2R823, Q96T88, P08581, B2R841, H0UI22, P62273, B2R4U3, P17096, A0A140VJE0, P62857, P07311, F1JVV5, Q96GA3, O75438, C9JCN8, Q12872, Q8N4P8, A0A097PY54, A0A024RDF4, J3QR09, Q9Y6H1, Q8IY37, B3KS36, Q5JXX1, Q9NY93, F8VZJ2, P62861, Q9BVJ6, P63173, A5YRV2, P83881, A8K7D9, P62269, A8K201
4	GO:0072422	signal transduction involved in DNA damage checkpoint	Biological Process	2	Q09472, A5YRV2
4	GO:0051607	defense response to virus	Biological Process	2	Q5TEC6, A0A0A0MTB0
4	GO:0048513	animal organ development	Biological Process	14	B6CGU5, O75911, Q09472, C9JCN8, Q14517, O15230, A0A024RDF4, F8VZJ2, Q75MX0, Q5JR08, P08581, A0A024R8K7, A0A024R2W4, B1ALI9
4	GO:0048514	blood vessel morphogenesis	Biological Process	1	Q5JR08
4	GO:0051128	regulation of cellular component organization	Biological Process	16	Q5TEC6, Q09472, C9JCN8, A0A087X1T2, Q9BVP2, Q75MX0, B2R4N3, Q5JR08, Q96T88, P08582, B2R841, A5YRV2, B2R4U3, P17096, B4DT46, A0A024R2W4
4	GO:0009966	regulation of signal transduction	Biological Process	10	B6CGU5, Q9H5M4, Q52LW3, Q5JR08, Q09472, P08581, A5YRV2, B4DT46, A0A024R2W4, P52735
4	GO:0007051	spindle organization	Biological Process	2	Q5JR08, B2R841
4	GO:0010035	response to inorganic substance	Biological Process	3	Q5JR08, Q09472, P08581
4	GO:0044260	cellular macromolecule metabolic process	Biological Process	53	O95478, Q6DKI1, Q5VV42, P62081, B5BU78, B2R823, Q5JR08, Q96T88, H0UI22, P62273, P53609, B6CGU5, P82914, Q92604, Q12872, A0A024RDF4, J3QR09, Q9Y6H1, Q9NY93, F8VZJ2, P63173, P83881, A8K201, Q9H5M4, Q09472, Q13895, Q5TEC6, Q8NEF9, A0A087X1T2, Q9BVP2, Q9H9Y2, P08581, B2R841, P08582, B2R4U3, P17096, P62857, A0A024R2W4, F1JVV5, Q96GA3, Q6FHK1, C9JCN8, Q8N4P8, Q8IY37, B3KS36, Q5JXX1, B2R4N3, P62861, Q6I…
4	GO:0002347	response to tumor cell	Biological Process	1	B1ALI9
4	GO:0006575	cellular modified amino acid metabolic process	Biological Process	1	A0A0A0MTB0
4	GO:0051702	interaction with symbiont	Biological Process	1	Q09472
4	GO:0098609	cell-cell adhesion	Biological Process	3	Q14517, Q8N4P8, A0A024R8K7
4	GO:0032369	negative regulation of lipid transport	Biological Process	1	A0A087X1T2
4	GO:0080134	regulation of response to stress	Biological Process	8	Q09472, Q5TEC6, P08581, A5YRV2, B4DT46, P17096, P52735, Q9Y6H1
4	GO:0010817	regulation of hormone levels	Biological Process	1	O75911
4	GO:0044765	single-organism transport	Biological Process	21	O75438, A0A087X1T2, A0A097PY54, J3QR09, P62081, P52735, D6RIZ4, A8KAQ3, P62861, P63173, Q6PJ25, Q03169, P62273, P83881, B4DT46, P62857, A0A024R2W4, A8K7D9, P62269, Q9HBR0, B4DYY3
4	GO:0009968	negative regulation of signal transduction	Biological Process	2	A5YRV2, A0A024R2W4
4	GO:0034641	cellular nitrogen compound metabolic process	Biological Process	49	O95478, Q6DKI1, Q5VV42, P62081, O43678, B2R823, Q96T88, H0UI22, P62273, A0A140VJE0, P07311, P82914, Q12872, A0A024RDF4, A0A097PY54, J3QR09, Q9Y6H1, Q9NY93, F8VZJ2, P63173, P83881, A8K201, Q09472, Q5TEC6, Q13895, Q8NEF9, Q9BVP2, A0A087X1T2, Q9H9Y2, P08581, B2R841, B2R4U3, P17096, P62857, F1JVV5, Q96GA3, Q6FHK1, O75438, C9JCN8, Q8N4P8, Q8IY37, B3KS36, Q5JXX1, P62861, Q6IAM0, Q9BVJ6, A5YRV2, A8K7D9,…
4	GO:0070085	glycosylation	Biological Process	2	A5YRV2, A0A024R2W4
4	GO:0006091	generation of precursor metabolites and energy	Biological Process	3	O75438, O43678, P07311
4	GO:0032204	regulation of telomere maintenance	Biological Process	1	Q9BVP2
4	GO:0010171	body morphogenesis	Biological Process	1	A0A024R2W4
4	GO:0097186	amelogenesis	Biological Process	1	A0A024R8K7
4	GO:0070271	protein complex biogenesis	Biological Process	9	Q9H5M4, Q5TEC6, O75438, Q09472, B2R4U3, B4DT46, P17096, B0AZV9, O43678
4	GO:0006413	translational initiation	Biological Process	9	Q6IAM0, P62861, P63173, P62273, P83881, J3QR09, P62081, P62857, P62269
4	GO:0010632	regulation of epithelial cell migration	Biological Process	2	Q5JR08, P08581
4	GO:0044711	single-organism biosynthetic process	Biological Process	8	O00767, O75438, Q92604, A0A097PY54, B4DE67, B3KRC6, A0A140VJE0, P07311
4	GO:0043933	macromolecular complex subunit organization	Biological Process	17	Q9H5M4, P82914, Q5TEC6, Q09472, O75438, Q12872, B0AZV9, O43678, Q5JXX1, Q96T88, P63173, B2R4U3, A5YRV2, P17096, B4DT46, H3BMQ2, Q6FHK1
4	GO:0016032	viral process	Biological Process	15	Q09472, Q5TEC6, A0A0A0MTB0, J3QR09, P62081, Q6IAM0, P62861, P63173, P62273, P83881, P17096, P62857, A0A024R2W4, A8K7D9, P62269
4	GO:0001525	angiogenesis	Biological Process	1	Q5JR08
4	GO:0048565	digestive tract development	Biological Process	1	A0A024R8K7
4	GO:0001817	regulation of cytokine production	Biological Process	2	Q09472, B4DT46
4	GO:2000147	positive regulation of cell motility	Biological Process	3	Q5JR08, P08581, Q75MX0
4	GO:0009967	positive regulation of signal transduction	Biological Process	4	Q9H5M4, Q5JR08, P08581, B4DT46
4	GO:0072593	reactive oxygen species metabolic process	Biological Process	1	B4DT46
4	GO:0001819	positive regulation of cytokine production	Biological Process	2	Q09472, B4DT46
4	GO:0016458	gene silencing	Biological Process	2	Q5TEC6, P17096
4	GO:1901698	response to nitrogen compound	Biological Process	2	A0A024RDF4, A8KAQ3
4	GO:0032880	regulation of protein localization	Biological Process	5	B2R4N3, Q5JR08, A0A087X1T2, B2R841, Q9BVP2
4	GO:0000910	cytokinesis	Biological Process	3	Q5JR08, B2R841, D3DR37
4	GO:0034330	cell junction organization	Biological Process	3	Q5JR08, A0A024R8K7, O15230
4	GO:0030193	regulation of blood coagulation	Biological Process	1	P52735
4	GO:0090066	regulation of anatomical structure size	Biological Process	2	P52735, Q75MX0
4	GO:0022411	cellular component disassembly	Biological Process	6	P82914, A0A087X1T2, P08582, B2R841, P17096, Q6FHK1
4	GO:0051726	regulation of cell cycle	Biological Process	6	Q09472, Q5JR08, Q8N4P8, B2R841, A5YRV2, B2R4U3
4	GO:0035239	tube morphogenesis	Biological Process	2	Q5JR08, P08581
4	GO:0098542	defense response to other organism	Biological Process	4	Q5TEC6, P62861, A0A0A0MTB0, B4DT46
4	GO:0060560	developmental growth involved in morphogenesis	Biological Process	1	Q75MX0
4	GO:0006935	chemotaxis	Biological Process	3	Q5JR08, P08581, Q75MX0
4	GO:0007164	establishment of tissue polarity	Biological Process	1	Q5JR08
4	GO:0031349	positive regulation of defense response	Biological Process	2	Q09472, B4DT46
4	GO:0010927	cellular component assembly involved in morphogenesis	Biological Process	3	Q9H5M4, A0A024R2W4, B4DYY3
4	GO:0051130	positive regulation of cellular component organization	Biological Process	10	B2R4N3, Q5JR08, Q09472, P08582, A0A087X1T2, Q9BVP2, A5YRV2, B2R4U3, B4DT46, A0A024R2W4
4	GO:0044068	modulation by symbiont of host cellular process	Biological Process	1	A8K7D9
4	GO:0006979	response to oxidative stress	Biological Process	3	Q5JR08, P08581, B4DT46
4	GO:0001816	cytokine production	Biological Process	2	Q09472, B4DT46
4	GO:0097354	prenylation	Biological Process	1	P53609
4	GO:0043170	macromolecule metabolic process	Biological Process	57	O95478, Q6DKI1, Q5VV42, P62081, B5BU78, B2R823, Q5JR08, Q96T88, H0UI22, P62273, P53609, B6CGU5, P82914, Q92604, Q12872, A0A024RDF4, J3QR09, Q9Y6H1, Q9NY93, F8VZJ2, P63173, A0A024R8K7, P83881, A8K201, Q9H5M4, Q09472, Q13895, Q5TEC6, Q8NEF9, A0A087X1T2, Q9BVP2, P52735, A8KAQ3, Q9H9Y2, P08581, B2R841, P08582, B2R4U3, P17096, P62857, A0A024R2W4, F1JVV5, Q96GA3, Q6FHK1, C9JCN8, Q8N4P8, Q13823, Q8IY37,…
4	GO:0009991	response to extracellular stimulus	Biological Process	1	A0A087X1T2
4	GO:0008219	cell death	Biological Process	10	B6CGU5, Q09472, Q5JR08, C9JCN8, P08581, B2R841, A5YRV2, P52735, A8KAQ3, F6TR53
4	GO:0019637	organophosphate metabolic process	Biological Process	7	O75438, Q92604, A0A0A0MTB0, A0A097PY54, O43678, A0A140VJE0, P07311
4	GO:0044092	negative regulation of molecular function	Biological Process	4	Q8N4P8, B2R841, B2R4U3, A8KAQ3
4	GO:0048640	negative regulation of developmental growth	Biological Process	1	Q75MX0
4	GO:0042594	response to starvation	Biological Process	1	A0A087X1T2
4	GO:0006793	phosphorus metabolic process	Biological Process	14	Q9H5M4, O75438, Q92604, Q8N4P8, A0A0A0MTB0, A0A097PY54, O43678, B5BU78, Q5JR08, P08581, B2R841, A0A024R2W4, A0A140VJE0, P07311
4	GO:0006810	transport	Biological Process	33	Q9H5M4, A0A087X1T2, A0A0A0MTB0, P62081, A6NLH6, P52735, A8KAQ3, Q5JR08, Q6PJ25, Q03169, P08582, P62273, P17096, B4DT46, P62857, A0A024R2W4, Q86U90, B4DYY3, Q9HBR0, A0A024R7S3, O75438, A0A097PY54, A0A024RDF4, J3QR09, B0AZV9, D6RIZ4, B4DE48, B2R4N3, P62861, P63173, P83881, A8K7D9, P62269
4	GO:0070727	cellular macromolecule localization	Biological Process	18	Q9H5M4, A0A024R7S3, A0A087X1T2, Q9BVP2, J3QR09, P62081, B2R4N3, Q5JR08, P62861, P63173, B2R841, P62273, P83881, P62857, A0A024R2W4, A8K7D9, P62269, B4DYY3
4	GO:0010942	positive regulation of cell death	Biological Process	3	B6CGU5, Q5JR08, P52735
4	GO:1901657	glycosyl compound metabolic process	Biological Process	5	O75438, A0A097PY54, O43678, A0A140VJE0, P07311
4	GO:0007049	cell cycle	Biological Process	9	Q9H5M4, Q5JR08, Q09472, Q8N4P8, B2R841, B2R4U3, A5YRV2, D3DR37, O43805
4	GO:0051129	negative regulation of cellular component organization	Biological Process	6	Q5JR08, Q5TEC6, B2R841, P08582, P17096, Q75MX0
4	GO:0048638	regulation of developmental growth	Biological Process	1	Q75MX0
4	GO:0051701	interaction with host	Biological Process	2	A0A024R2W4, A8K7D9
4	GO:0032206	positive regulation of telomere maintenance	Biological Process	1	Q9BVP2
4	GO:0051302	regulation of cell division	Biological Process	2	Q5JR08, B1ALI9
4	GO:0035878	nail development	Biological Process	1	A0A024R8K7
4	GO:2001021	negative regulation of response to DNA damage stimulus	Biological Process	1	A5YRV2
4	GO:0071495	cellular response to endogenous stimulus	Biological Process	2	Q5JR08, Q09472
4	GO:0001568	blood vessel development	Biological Process	1	Q5JR08
4	GO:0035383	thioester metabolic process	Biological Process	1	O00767
4	GO:0030901	midbrain development	Biological Process	1	Q5JR08
4	GO:0010948	negative regulation of cell cycle process	Biological Process	3	Q09472, B2R841, A5YRV2
4	GO:0090068	positive regulation of cell cycle process	Biological Process	4	Q5JR08, Q09472, A5YRV2, B2R4U3
4	GO:0044766	multi-organism transport	Biological Process	1	A8K7D9
4	GO:0034446	substrate adhesion-dependent cell spreading	Biological Process	2	P08582, O15230
4	GO:0007275	multicellular organism development	Biological Process	21	B6CGU5, Q09472, O75911, Q13895, C9JCN8, Q14517, A0A087X1T2, O15230, A0A024RDF4, A0A0A0MTB0, P52735, Q75MX0, F8VZJ2, Q5JR08, Q96T88, P08581, Q6PJ25, A0A024R8K7, A0A024R2W4, B1ALI9, F1JVV5
4	GO:0033627	cell adhesion mediated by integrin	Biological Process	1	A5YRV2
4	GO:0046483	heterocycle metabolic process	Biological Process	46	O95478, Q09472, Q5TEC6, Q13895, Q8NEF9, Q9BVP2, A0A087X1T2, Q6DKI1, Q5VV42, P62081, O43678, Q9H9Y2, B2R823, Q96T88, P08581, B2R841, H0UI22, P62273, B2R4U3, P17096, A0A140VJE0, P62857, P07311, F1JVV5, Q96GA3, O75438, C9JCN8, Q12872, Q8N4P8, A0A097PY54, A0A024RDF4, J3QR09, Q9Y6H1, Q8IY37, B3KS36, Q5JXX1, Q9NY93, F8VZJ2, P62861, Q9BVJ6, P63173, A5YRV2, P83881, A8K7D9, P62269, A8K201
4	GO:0044723	single-organism carbohydrate metabolic process	Biological Process	1	P07311
4	GO:0048002	antigen processing and presentation of peptide antigen	Biological Process	1	B4DT46
4	GO:0031324	negative regulation of cellular metabolic process	Biological Process	12	Q5TEC6, Q09472, Q96T88, C9JCN8, Q8N4P8, B2R841, A0A087X1T2, A5YRV2, B2R4U3, A0A024RDF4, P17096, A0A024R2W4
4	GO:0021675	nerve development	Biological Process	1	Q75MX0
4	GO:1901343	negative regulation of vasculature development	Biological Process	1	Q5JR08
4	GO:1902115	regulation of organelle assembly	Biological Process	1	B2R841
4	GO:0045597	positive regulation of cell differentiation	Biological Process	1	Q5JR08
4	GO:0044248	cellular catabolic process	Biological Process	13	Q09472, J3QR09, P62081, Q6QN92, P62861, Q96T88, P63173, B2R841, B2R4U3, P62273, P83881, P62857, P62269
4	GO:0006403	RNA localization	Biological Process	1	A0A024RDF4
4	GO:0002251	organ or tissue specific immune response	Biological Process	1	P62861
4	GO:0007162	negative regulation of cell adhesion	Biological Process	3	Q8N4P8, P08582, A5YRV2
4	GO:1902580	single-organism cellular localization	Biological Process	12	A0A097PY54, J3QR09, P62081, P62861, P63173, P62273, P83881, P62857, A0A024R2W4, A8K7D9, P62269, B4DYY3
4	GO:0022607	cellular component assembly	Biological Process	19	Q9H5M4, Q5TEC6, Q09472, O75438, Q12872, O15230, B0AZV9, O43678, P52735, Q5JR08, P63173, B2R841, A0A024R8K7, B2R4U3, P17096, B4DT46, A0A024R2W4, H3BMQ2, B4DYY3
4	GO:0045787	positive regulation of cell cycle	Biological Process	4	Q5JR08, Q09472, A5YRV2, B2R4U3
4	GO:0050818	regulation of coagulation	Biological Process	1	P52735
4	GO:0006996	organelle organization	Biological Process	20	Q9H5M4, P82914, O75438, Q5TEC6, Q14517, A0A087X1T2, Q9BVP2, O15230, B0AZV9, O43678, A8KAQ3, B2R4N3, Q5JR08, B2R841, B2R4U3, P17096, D3DR37, A0A024R2W4, B4DYY3, Q6FHK1
4	GO:0051172	negative regulation of nitrogen compound metabolic process	Biological Process	9	Q09472, Q5TEC6, Q96T88, Q8N4P8, B2R841, A0A087X1T2, A5YRV2, A0A024RDF4, P17096
4	GO:0009896	positive regulation of catabolic process	Biological Process	2	B2R841, B2R4U3
4	GO:0044262	cellular carbohydrate metabolic process	Biological Process	1	Q2M2H8
4	GO:0090342	regulation of cell aging	Biological Process	1	P17096
4	GO:0080135	regulation of cellular response to stress	Biological Process	5	Q09472, P08581, A5YRV2, P17096, Q9Y6H1
4	GO:0045087	innate immune response	Biological Process	4	Q09472, P62861, A0A0A0MTB0, B4DT46
4	GO:0010883	regulation of lipid storage	Biological Process	1	A0A087X1T2
4	GO:0070482	response to oxygen levels	Biological Process	2	Q09472, Q9Y6H1
4	GO:1901360	organic cyclic compound metabolic process	Biological Process	50	O95478, Q6DKI1, Q5VV42, P62081, O43678, B5BU78, B2R823, Q96T88, H0UI22, P62273, A0A140VJE0, P07311, Q12872, A0A097PY54, A0A024RDF4, J3QR09, B4DE67, Q9Y6H1, Q9NY93, F8VZJ2, P63173, P83881, B3KRC6, A8K201, Q09472, Q5TEC6, Q13895, Q8NEF9, Q9BVP2, A0A087X1T2, Q9H9Y2, P08581, B2R841, B2R4U3, P17096, P62857, F1JVV5, Q96GA3, O75438, C9JCN8, Q8N4P8, B4DE48, Q8IY37, B3KS36, Q5JXX1, P62861, Q9BVJ6, A5YRV2,…
4	GO:0050792	regulation of viral process	Biological Process	2	Q09472, Q5TEC6
4	GO:0042127	regulation of cell proliferation	Biological Process	6	Q5JR08, C9JCN8, Q8N4P8, P08582, P53609, P17096
4	GO:0050817	coagulation	Biological Process	3	Q5TEC6, Q5JR08, P52735
4	GO:0044802	single-organism membrane organization	Biological Process	10	P62861, P63173, B2R841, P62273, P83881, J3QR09, P62081, P62857, P62269, B4DYY3
4	GO:0010633	negative regulation of epithelial cell migration	Biological Process	1	Q5JR08
4	GO:0048729	tissue morphogenesis	Biological Process	5	Q5JR08, P08581, Q14517, A0A024R8K7, O15230
4	GO:0032388	positive regulation of intracellular transport	Biological Process	3	B2R4N3, Q5JR08, A0A087X1T2
4	GO:0009266	response to temperature stimulus	Biological Process	1	Q09472
4	GO:0010941	regulation of cell death	Biological Process	8	B6CGU5, Q09472, Q5JR08, P08581, B2R841, A5YRV2, P52735, F6TR53
4	GO:0005975	carbohydrate metabolic process	Biological Process	2	Q2M2H8, P07311
4	GO:0060968	regulation of gene silencing	Biological Process	2	Q5TEC6, P17096
4	GO:0048857	neural nucleus development	Biological Process	1	Q5JR08
4	GO:0007565	female pregnancy	Biological Process	1	Q13895
4	GO:0006139	nucleobase-containing compound metabolic process	Biological Process	46	O95478, Q09472, Q5TEC6, Q13895, Q8NEF9, Q9BVP2, A0A087X1T2, Q6DKI1, Q5VV42, P62081, O43678, Q9H9Y2, B2R823, Q96T88, P08581, B2R841, H0UI22, P62273, B2R4U3, P17096, A0A140VJE0, P62857, P07311, F1JVV5, Q96GA3, O75438, C9JCN8, Q12872, Q8N4P8, A0A097PY54, A0A024RDF4, J3QR09, Q9Y6H1, Q8IY37, B3KS36, Q5JXX1, Q9NY93, F8VZJ2, P62861, Q9BVJ6, P63173, A5YRV2, P83881, A8K7D9, P62269, A8K201
4	GO:0007050	cell cycle arrest	Biological Process	2	Q09472, A5YRV2
4	GO:0043487	regulation of RNA stability	Biological Process	1	A0A024RDF4
4	GO:0001763	morphogenesis of a branching structure	Biological Process	1	P08581
4	GO:0031325	positive regulation of cellular metabolic process	Biological Process	18	B6CGU5, Q9H5M4, Q09472, C9JCN8, Q9BVP2, A0A087X1T2, A0A024RDF4, Q9Y6H1, Q5JR08, Q96T88, P08581, P08582, B2R841, A5YRV2, B2R4U3, B4DT46, P17096, F1JVV5
4	GO:0048736	appendage development	Biological Process	1	A0A024R8K7
4	GO:1901615	organic hydroxy compound metabolic process	Biological Process	3	O75911, B3KRC6, B4DE48
4	GO:0050921	positive regulation of chemotaxis	Biological Process	1	P08581
4	GO:0060341	regulation of cellular localization	Biological Process	5	B2R4N3, Q5JR08, A0A087X1T2, B2R841, Q9BVP2
4	GO:1900424	regulation of defense response to bacterium	Biological Process	1	B4DT46
5	GO:0060429	epithelium development	Biological Process	5	Q5JR08, P08581, Q14517, O15230, B1ALI9
5	GO:1905269	positive regulation of chromatin organization	Biological Process	1	A5YRV2
5	GO:0090169	regulation of spindle assembly	Biological Process	1	B2R841
5	GO:0030198	extracellular matrix organization	Biological Process	4	P08582, A0A024R8K7, O15230, A0A024R2W4
5	GO:0010558	negative regulation of macromolecule biosynthetic process	Biological Process	8	Q09472, Q5TEC6, Q96T88, Q8N4P8, B2R841, A0A087X1T2, A5YRV2, P17096
5	GO:0031329	regulation of cellular catabolic process	Biological Process	2	B2R841, B2R4U3
5	GO:0043488	regulation of mRNA stability	Biological Process	1	A0A024RDF4
5	GO:0075525	viral translational termination-reinitiation	Biological Process	1	Q6IAM0
5	GO:0007498	mesoderm development	Biological Process	1	A0A024R8K7
5	GO:0016482	cytosolic transport	Biological Process	1	A8KAQ3
5	GO:0061572	actin filament bundle organization	Biological Process	1	Q5JR08
5	GO:0010172	embryonic body morphogenesis	Biological Process	1	A0A024R2W4
5	GO:1901137	carbohydrate derivative biosynthetic process	Biological Process	4	A5YRV2, A0A097PY54, A0A024R2W4, A0A140VJE0
5	GO:0051338	regulation of transferase activity	Biological Process	5	Q5JR08, P08581, Q8N4P8, B2R841, B2R4U3
5	GO:1902531	regulation of intracellular signal transduction	Biological Process	7	Q52LW3, Q09472, Q5JR08, P08581, A5YRV2, A0A024R2W4, P52735
5	GO:0006839	mitochondrial transport	Biological Process	3	B2R4N3, A0A087X1T2, A0A097PY54
5	GO:0071456	cellular response to hypoxia	Biological Process	2	Q09472, Q9Y6H1
5	GO:0098742	cell-cell adhesion via plasma-membrane adhesion molecules	Biological Process	1	Q14517
5	GO:0065003	macromolecular complex assembly	Biological Process	12	Q9H5M4, O75438, Q5TEC6, Q09472, Q12872, B0AZV9, O43678, P63173, B2R4U3, P17096, B4DT46, H3BMQ2
5	GO:0007600	sensory perception	Biological Process	1	O75911
5	GO:0097031	mitochondrial respiratory chain complex I biogenesis	Biological Process	2	O75438, O43678
5	GO:0000088	mitotic prophase	Biological Process	1	B2R841
5	GO:0002478	antigen processing and presentation of exogenous peptide antigen	Biological Process	1	B4DT46
5	GO:1901565	organonitrogen compound catabolic process	Biological Process	2	Q09472, Q6QN92
5	GO:0008654	phospholipid biosynthetic process	Biological Process	1	Q92604
5	GO:0015849	organic acid transport	Biological Process	1	Q9HBR0
5	GO:1902410	mitotic cytokinetic process	Biological Process	1	Q5JR08
5	GO:1905330	regulation of morphogenesis of an epithelium	Biological Process	1	Q5JR08
5	GO:0006801	superoxide metabolic process	Biological Process	1	B4DT46
5	GO:0030336	negative regulation of cell migration	Biological Process	3	Q5JR08, Q8N4P8, A0A024R2W4
5	GO:0030111	regulation of Wnt signaling pathway	Biological Process	1	Q9H5M4
5	GO:2000772	regulation of cellular senescence	Biological Process	1	P17096
5	GO:0030516	regulation of axon extension	Biological Process	1	Q75MX0
5	GO:0051169	nuclear transport	Biological Process	3	P17096, A0A024R2W4, A8K7D9
5	GO:1901701	cellular response to oxygen-containing compound	Biological Process	3	Q5JR08, Q09472, P08581
5	GO:0032479	regulation of type I interferon production	Biological Process	1	Q09472
5	GO:0044267	cellular protein metabolic process	Biological Process	33	Q9H5M4, Q09472, Q5TEC6, Q9BVP2, Q6DKI1, P62081, B5BU78, Q5JR08, Q96T88, P08581, B2R841, P08582, H0UI22, B2R4U3, P62273, P53609, P62857, A0A024R2W4, Q6FHK1, B6CGU5, P82914, Q8N4P8, A0A024RDF4, J3QR09, B3KS36, Q5JXX1, F8VZJ2, Q6IAM0, P62861, P63173, A5YRV2, P83881, P62269
5	GO:0000281	mitotic cytokinesis	Biological Process	3	Q5JR08, B2R841, D3DR37
5	GO:0050768	negative regulation of neurogenesis	Biological Process	2	Q5JR08, Q75MX0
5	GO:0090224	regulation of spindle organization	Biological Process	1	B2R841
5	GO:1901361	organic cyclic compound catabolic process	Biological Process	9	P62861, P63173, P62273, P83881, J3QR09, P62081, P62857, B4DE48, P62269
5	GO:0060537	muscle tissue development	Biological Process	1	F8VZJ2
5	GO:0009790	embryo development	Biological Process	3	A0A024R8K7, O15230, A0A024R2W4
5	GO:0006896	Golgi to vacuole transport	Biological Process	1	A8KAQ3
5	GO:0008361	regulation of cell size	Biological Process	2	P52735, Q75MX0
5	GO:0009100	glycoprotein metabolic process	Biological Process	2	A5YRV2, A0A024R2W4
5	GO:0046486	glycerolipid metabolic process	Biological Process	2	Q92604, A0A0A0MTB0
5	GO:0022408	negative regulation of cell-cell adhesion	Biological Process	1	Q8N4P8
5	GO:0007517	muscle organ development	Biological Process	1	F8VZJ2
5	GO:2001020	regulation of response to DNA damage stimulus	Biological Process	1	A5YRV2
5	GO:0009063	cellular amino acid catabolic process	Biological Process	2	Q09472, Q6QN92
5	GO:0051960	regulation of nervous system development	Biological Process	2	Q5JR08, Q75MX0
5	GO:0001649	osteoblast differentiation	Biological Process	1	Q8N4P8
5	GO:0045216	cell-cell junction organization	Biological Process	1	Q5JR08
5	GO:0006644	phospholipid metabolic process	Biological Process	2	Q92604, A0A0A0MTB0
5	GO:0007005	mitochondrion organization	Biological Process	6	B2R4N3, P82914, O75438, A0A087X1T2, O43678, Q6FHK1
5	GO:0000902	cell morphogenesis	Biological Process	7	Q9H5M4, Q5JR08, P08581, P08582, O15230, B4DYY3, Q75MX0
5	GO:0001655	urogenital system development	Biological Process	1	A0A024R8K7
5	GO:0014070	response to organic cyclic compound	Biological Process	1	Q09472
5	GO:0005996	monosaccharide metabolic process	Biological Process	1	P07311
5	GO:1903053	regulation of extracellular matrix organization	Biological Process	2	P08582, A0A024R2W4
5	GO:0036211	protein modification process	Biological Process	14	Q9H5M4, Q09472, Q8N4P8, Q9BVP2, Q5JXX1, B5BU78, Q5JR08, Q96T88, P08581, B2R841, B2R4U3, A5YRV2, P53609, A0A024R2W4
5	GO:0048199	vesicle targeting, to, from or within Golgi	Biological Process	1	B0AZV9
5	GO:0031326	regulation of cellular biosynthetic process	Biological Process	16	Q5TEC6, Q09472, C9JCN8, Q8N4P8, Q9BVP2, A0A087X1T2, A0A024RDF4, Q9Y6H1, F8VZJ2, Q6IAM0, Q96T88, P08581, B2R841, A5YRV2, P17096, F1JVV5
5	GO:0051223	regulation of protein transport	Biological Process	3	B2R4N3, Q5JR08, A0A087X1T2
5	GO:0008610	lipid biosynthetic process	Biological Process	4	O00767, Q92604, B4DE67, B3KRC6
5	GO:0009057	macromolecule catabolic process	Biological Process	11	P62861, Q96T88, P63173, B2R841, B2R4U3, P62273, P83881, J3QR09, P62081, P62857, P62269
5	GO:0000904	cell morphogenesis involved in differentiation	Biological Process	5	Q5JR08, P08581, P08582, O15230, Q75MX0
5	GO:0010878	cholesterol storage	Biological Process	1	A0A087X1T2
5	GO:0071702	organic substance transport	Biological Process	22	A0A024R7S3, A0A087X1T2, A0A024RDF4, A0A0A0MTB0, J3QR09, P62081, D6RIZ4, B4DE48, A8KAQ3, B2R4N3, Q5JR08, P62861, P63173, Q6PJ25, P62273, P83881, P62857, A0A024R2W4, A8K7D9, P62269, Q9HBR0, B4DYY3
5	GO:0007399	nervous system development	Biological Process	7	Q5JR08, Q09472, P08581, Q14517, A0A0A0MTB0, Q75MX0, F1JVV5
5	GO:0010557	positive regulation of macromolecule biosynthetic process	Biological Process	11	Q09472, C9JCN8, Q96T88, P08581, Q9BVP2, A0A087X1T2, A5YRV2, A0A024RDF4, P17096, Q9Y6H1, F1JVV5
5	GO:0045840	positive regulation of mitotic nuclear division	Biological Process	1	B2R4U3
5	GO:0051248	negative regulation of protein metabolic process	Biological Process	4	Q8N4P8, B2R841, B2R4U3, A0A024R2W4
5	GO:0031570	DNA integrity checkpoint	Biological Process	3	Q09472, B2R841, A5YRV2
5	GO:0032606	type I interferon production	Biological Process	1	Q09472
5	GO:0019439	aromatic compound catabolic process	Biological Process	8	P62861, P63173, P62273, P83881, J3QR09, P62081, P62857, P62269
5	GO:0009267	cellular response to starvation	Biological Process	1	A0A087X1T2
5	GO:0061138	morphogenesis of a branching epithelium	Biological Process	1	P08581
5	GO:0043069	negative regulation of programmed cell death	Biological Process	3	P08581, B2R841, A5YRV2
5	GO:0070201	regulation of establishment of protein localization	Biological Process	3	B2R4N3, Q5JR08, A0A087X1T2
5	GO:0007030	Golgi organization	Biological Process	1	Q9H5M4
5	GO:1903055	positive regulation of extracellular matrix organization	Biological Process	2	P08582, A0A024R2W4
5	GO:0034613	cellular protein localization	Biological Process	18	Q9H5M4, A0A024R7S3, A0A087X1T2, Q9BVP2, J3QR09, P62081, B2R4N3, Q5JR08, P62861, P63173, B2R841, P62273, P83881, P62857, A0A024R2W4, A8K7D9, P62269, B4DYY3
5	GO:0072358	cardiovascular system development	Biological Process	1	Q5JR08
5	GO:0051054	positive regulation of DNA metabolic process	Biological Process	1	Q9BVP2
5	GO:1903034	regulation of response to wounding	Biological Process	1	P52735
5	GO:0042572	retinol metabolic process	Biological Process	1	O75911
5	GO:0032481	positive regulation of type I interferon production	Biological Process	1	Q09472
5	GO:0009755	hormone-mediated signaling pathway	Biological Process	1	Q09472
5	GO:0031331	positive regulation of cellular catabolic process	Biological Process	2	B2R841, B2R4U3
5	GO:0001944	vasculature development	Biological Process	1	Q5JR08
5	GO:0031047	gene silencing by RNA	Biological Process	1	Q5TEC6
5	GO:0070507	regulation of microtubule cytoskeleton organization	Biological Process	1	B2R841
5	GO:0006508	proteolysis	Biological Process	6	B6CGU5, Q96T88, B2R841, P08582, B2R4U3, A0A024R2W4
5	GO:0006732	coenzyme metabolic process	Biological Process	3	O00767, O75438, P07311
5	GO:1901659	glycosyl compound biosynthetic process	Biological Process	2	A0A097PY54, A0A140VJE0
5	GO:0006887	exocytosis	Biological Process	1	Q03169
5	GO:0010638	positive regulation of organelle organization	Biological Process	5	B2R4N3, Q5JR08, A0A087X1T2, Q9BVP2, B2R4U3
5	GO:0034605	cellular response to heat	Biological Process	1	Q09472
5	GO:0051276	chromosome organization	Biological Process	5	Q5TEC6, B2R841, Q9BVP2, P17096, D3DR37
5	GO:0045934	negative regulation of nucleobase-containing compound metabolic process	Biological Process	8	Q09472, Q5TEC6, Q96T88, Q8N4P8, B2R841, A0A087X1T2, A5YRV2, P17096
5	GO:0000070	mitotic sister chromatid segregation	Biological Process	2	B2R841, D3DR37
5	GO:0030100	regulation of endocytosis	Biological Process	1	B4DT46
5	GO:0050000	chromosome localization	Biological Process	1	D3DR37
5	GO:0002429	immune response-activating cell surface receptor signaling pathway	Biological Process	2	Q09472, P52735
5	GO:0016053	organic acid biosynthetic process	Biological Process	2	O00767, B4DE67
5	GO:0016525	negative regulation of angiogenesis	Biological Process	1	Q5JR08
5	GO:0071310	cellular response to organic substance	Biological Process	9	Q5JR08, Q09472, Q13895, C9JCN8, P08581, A0A024RDF4, B4DT46, A8KAQ3, F1JVV5
5	GO:0031667	response to nutrient levels	Biological Process	1	A0A087X1T2
5	GO:0030031	cell projection assembly	Biological Process	3	Q9H5M4, Q5JR08, B4DYY3
5	GO:0019048	modulation by virus of host morphology or physiology	Biological Process	2	A0A024R2W4, A8K7D9
5	GO:1902582	single-organism intracellular transport	Biological Process	11	P62861, P63173, P62273, P83881, A0A097PY54, J3QR09, P62081, P62857, A0A024R2W4, A8K7D9, P62269
5	GO:0006525	arginine metabolic process	Biological Process	1	H0UI22
5	GO:0019054	modulation by virus of host process	Biological Process	1	A8K7D9
5	GO:0019083	viral transcription	Biological Process	9	Q09472, P62861, P63173, P62273, P83881, J3QR09, P62081, P62857, P62269
5	GO:0007093	mitotic cell cycle checkpoint	Biological Process	3	Q09472, B2R841, A5YRV2
5	GO:0071453	cellular response to oxygen levels	Biological Process	2	Q09472, Q9Y6H1
5	GO:0071156	regulation of cell cycle arrest	Biological Process	2	Q09472, A5YRV2
5	GO:0008202	steroid metabolic process	Biological Process	3	B4DE67, B3KRC6, B4DE48
5	GO:1902230	negative regulation of intrinsic apoptotic signaling pathway in response to DNA damage	Biological Process	1	A5YRV2
5	GO:0033629	negative regulation of cell adhesion mediated by integrin	Biological Process	1	A5YRV2
5	GO:0031327	negative regulation of cellular biosynthetic process	Biological Process	8	Q09472, Q5TEC6, Q96T88, Q8N4P8, B2R841, A0A087X1T2, A5YRV2, P17096
5	GO:0046903	secretion	Biological Process	1	Q03169
5	GO:0001667	ameboidal-type cell migration	Biological Process	4	Q5JR08, P08581, Q75MX0, B5BU78
5	GO:0006553	lysine metabolic process	Biological Process	1	Q09472
5	GO:0072594	establishment of protein localization to organelle	Biological Process	12	A0A087X1T2, J3QR09, P62081, B2R4N3, P62861, P63173, P62273, P83881, P62857, A0A024R2W4, A8K7D9, P62269
5	GO:2000379	positive regulation of reactive oxygen species metabolic process	Biological Process	1	B4DT46
5	GO:0036473	cell death in response to oxidative stress	Biological Process	1	P08581
5	GO:0198738	cell-cell signaling by wnt	Biological Process	2	Q9H5M4, Q5JR08
5	GO:0048634	regulation of muscle organ development	Biological Process	1	F8VZJ2
5	GO:2001233	regulation of apoptotic signaling pathway	Biological Process	2	B6CGU5, A5YRV2
5	GO:0022604	regulation of cell morphogenesis	Biological Process	3	Q5JR08, P08582, Q75MX0
5	GO:0032984	macromolecular complex disassembly	Biological Process	3	P82914, P17096, Q6FHK1
5	GO:0060562	epithelial tube morphogenesis	Biological Process	2	Q5JR08, P08581
5	GO:0036293	response to decreased oxygen levels	Biological Process	2	Q09472, Q9Y6H1
5	GO:0010628	positive regulation of gene expression	Biological Process	13	Q5TEC6, Q09472, C9JCN8, Q9BVP2, A0A087X1T2, A0A024RDF4, Q9Y6H1, Q96T88, P08581, P08582, A5YRV2, P17096, F1JVV5
5	GO:0016054	organic acid catabolic process	Biological Process	2	Q09472, Q6QN92
5	GO:0045089	positive regulation of innate immune response	Biological Process	2	Q09472, B4DT46
5	GO:1990138	neuron projection extension	Biological Process	1	Q75MX0
5	GO:0001707	mesoderm formation	Biological Process	1	A0A024R8K7
5	GO:0035556	intracellular signal transduction	Biological Process	9	B6CGU5, Q52LW3, Q09472, Q5JR08, P08581, B2R841, A5YRV2, A0A024R2W4, P52735
5	GO:0001736	establishment of planar polarity	Biological Process	1	Q5JR08
5	GO:0051188	cofactor biosynthetic process	Biological Process	2	O00767, O75438
5	GO:0006886	intracellular protein transport	Biological Process	14	A0A024R7S3, A0A087X1T2, J3QR09, P62081, B2R4N3, Q5JR08, P62861, P63173, P62273, P83881, P62857, A0A024R2W4, A8K7D9, P62269
5	GO:0044272	sulfur compound biosynthetic process	Biological Process	1	O00767
5	GO:1903428	positive regulation of reactive oxygen species biosynthetic process	Biological Process	1	B4DT46
5	GO:0034121	regulation of toll-like receptor signaling pathway	Biological Process	1	B4DT46
5	GO:0002764	immune response-regulating signaling pathway	Biological Process	3	Q09472, B4DT46, P52735
5	GO:0043603	cellular amide metabolic process	Biological Process	16	P82914, Q6DKI1, A0A024RDF4, J3QR09, P62081, B3KS36, F8VZJ2, Q6IAM0, P62861, P63173, H0UI22, P62273, P83881, P62857, P62269, Q6FHK1
5	GO:0072521	purine-containing compound metabolic process	Biological Process	5	O75438, A0A097PY54, O43678, A0A140VJE0, P07311
5	GO:0019219	regulation of nucleobase-containing compound metabolic process	Biological Process	18	Q09472, Q5TEC6, C9JCN8, Q12872, Q8N4P8, Q9BVP2, A0A087X1T2, A0A024RDF4, Q9Y6H1, F8VZJ2, Q96T88, P08581, B2R841, A5YRV2, B2R4U3, P17096, A8K7D9, F1JVV5
5	GO:1901617	organic hydroxy compound biosynthetic process	Biological Process	1	B3KRC6
5	GO:0001709	cell fate determination	Biological Process	1	O00458
5	GO:0048285	organelle fission	Biological Process	4	Q5JR08, B2R841, B2R4U3, D3DR37
5	GO:0031328	positive regulation of cellular biosynthetic process	Biological Process	11	Q09472, C9JCN8, Q96T88, P08581, Q9BVP2, A0A087X1T2, A5YRV2, A0A024RDF4, P17096, Q9Y6H1, F1JVV5
5	GO:0045935	positive regulation of nucleobase-containing compound metabolic process	Biological Process	10	Q09472, C9JCN8, Q96T88, P08581, Q9BVP2, A0A087X1T2, A5YRV2, P17096, Q9Y6H1, F1JVV5
5	GO:1902850	microtubule cytoskeleton organization involved in mitosis	Biological Process	2	Q5JR08, B2R841
5	GO:0010212	response to ionizing radiation	Biological Process	1	Q5JR08
5	GO:0042176	regulation of protein catabolic process	Biological Process	2	B2R841, B2R4U3
5	GO:0072001	renal system development	Biological Process	1	A0A024R8K7
5	GO:0051310	metaphase plate congression	Biological Process	1	D3DR37
5	GO:1905268	negative regulation of chromatin organization	Biological Process	1	P17096
5	GO:0060326	cell chemotaxis	Biological Process	1	P08581
5	GO:0010596	negative regulation of endothelial cell migration	Biological Process	1	Q5JR08
5	GO:0031023	microtubule organizing center organization	Biological Process	1	B2R841
5	GO:2000377	regulation of reactive oxygen species metabolic process	Biological Process	1	B4DT46
5	GO:0006753	nucleoside phosphate metabolic process	Biological Process	5	O75438, A0A097PY54, A0A140VJE0, O43678, P07311
5	GO:0008544	epidermis development	Biological Process	1	B1ALI9
5	GO:0010556	regulation of macromolecule biosynthetic process	Biological Process	16	Q5TEC6, Q09472, C9JCN8, Q8N4P8, Q9BVP2, A0A087X1T2, A0A024RDF4, Q9Y6H1, F8VZJ2, Q6IAM0, Q96T88, P08581, B2R841, A5YRV2, P17096, F1JVV5
5	GO:0043620	regulation of DNA-templated transcription in response to stress	Biological Process	2	Q09472, A5YRV2
5	GO:0030335	positive regulation of cell migration	Biological Process	3	Q5JR08, P08581, Q75MX0
5	GO:0007417	central nervous system development	Biological Process	1	Q5JR08
5	GO:0006757	ATP generation from ADP	Biological Process	1	P07311
5	GO:0006720	isoprenoid metabolic process	Biological Process	1	O75911
5	GO:0014031	mesenchymal cell development	Biological Process	1	Q75MX0
5	GO:0051247	positive regulation of protein metabolic process	Biological Process	12	B6CGU5, Q9H5M4, Q09472, Q9BVP2, A0A024RDF4, Q5JR08, Q96T88, P08581, P08582, B2R841, A5YRV2, B2R4U3
5	GO:0015893	drug transport	Biological Process	1	D6RIZ4
5	GO:0044270	cellular nitrogen compound catabolic process	Biological Process	8	P62861, P63173, P62273, P83881, J3QR09, P62081, P62857, P62269
5	GO:0019042	viral latency	Biological Process	1	P17096
5	GO:0006643	membrane lipid metabolic process	Biological Process	1	A0A0A0MTB0
5	GO:0071228	cellular response to tumor cell	Biological Process	1	B1ALI9
5	GO:0043001	Golgi to plasma membrane protein transport	Biological Process	1	B4DYY3
5	GO:0045930	negative regulation of mitotic cell cycle	Biological Process	3	Q09472, B2R841, A5YRV2
5	GO:0022904	respiratory electron transport chain	Biological Process	2	O75438, O43678
5	GO:0007080	mitotic metaphase plate congression	Biological Process	1	D3DR37
5	GO:0051851	modification by host of symbiont morphology or physiology	Biological Process	1	Q09472
5	GO:0016202	regulation of striated muscle tissue development	Biological Process	1	F8VZJ2
5	GO:0048666	neuron development	Biological Process	2	Q5JR08, Q75MX0
5	GO:0032270	positive regulation of cellular protein metabolic process	Biological Process	12	B6CGU5, Q9H5M4, Q5JR08, Q09472, Q96T88, P08581, P08582, Q9BVP2, B2R841, A5YRV2, B2R4U3, A0A024RDF4
5	GO:0030154	cell differentiation	Biological Process	16	B6CGU5, O00458, Q09472, C9JCN8, Q8N4P8, O15230, A8KAQ3, Q75MX0, Q5JR08, P08581, A0A024R8K7, P08582, P17096, A0A024R2W4, B1ALI9, F1JVV5
5	GO:0034654	nucleobase-containing compound biosynthetic process	Biological Process	23	Q09472, Q5TEC6, C9JCN8, Q9BVP2, A0A087X1T2, A0A097PY54, J3QR09, P62081, Q9Y6H1, F8VZJ2, Q96T88, P62861, P08581, P63173, B2R841, A5YRV2, P62273, P83881, P17096, A0A140VJE0, P62857, P62269, F1JVV5
5	GO:0006796	phosphate-containing compound metabolic process	Biological Process	14	Q9H5M4, O75438, Q92604, Q8N4P8, A0A0A0MTB0, A0A097PY54, O43678, B5BU78, Q5JR08, P08581, B2R841, A0A024R2W4, A0A140VJE0, P07311
5	GO:0032635	interleukin-6 production	Biological Process	1	B4DT46
5	GO:2000027	regulation of organ morphogenesis	Biological Process	1	Q5JR08
5	GO:1901362	organic cyclic compound biosynthetic process	Biological Process	25	Q09472, Q5TEC6, Q9BVP2, A0A087X1T2, P62081, Q96T88, P08581, B2R841, P62273, P17096, A0A140VJE0, P62857, F1JVV5, C9JCN8, A0A097PY54, B4DE67, J3QR09, Q9Y6H1, F8VZJ2, P62861, P63173, A5YRV2, P83881, B3KRC6, P62269
5	GO:0043434	response to peptide hormone	Biological Process	1	A8KAQ3
5	GO:0045333	cellular respiration	Biological Process	2	O75438, O43678
5	GO:0034248	regulation of cellular amide metabolic process	Biological Process	2	Q6IAM0, A0A024RDF4
5	GO:1902583	multi-organism intracellular transport	Biological Process	1	A8K7D9
5	GO:0070925	organelle assembly	Biological Process	4	Q9H5M4, Q5JR08, B2R841, B4DYY3
5	GO:0061640	cytoskeleton-dependent cytokinesis	Biological Process	3	Q5JR08, B2R841, D3DR37
5	GO:0097190	apoptotic signaling pathway	Biological Process	4	B6CGU5, Q09472, A5YRV2, A8KAQ3
5	GO:0043085	positive regulation of catalytic activity	Biological Process	6	B6CGU5, Q5JR08, Q96T88, P08581, B2R841, B2R4U3
5	GO:0016052	carbohydrate catabolic process	Biological Process	1	P07311
5	GO:1904259	regulation of basement membrane assembly involved in embryonic body morphogenesis	Biological Process	1	A0A024R2W4
5	GO:0060284	regulation of cell development	Biological Process	3	Q5JR08, P08582, Q75MX0
5	GO:0010717	regulation of epithelial to mesenchymal transition	Biological Process	1	A0A024R2W4
5	GO:0006563	L-serine metabolic process	Biological Process	1	Q6QN92
5	GO:1903146	regulation of mitophagy	Biological Process	1	A0A087X1T2
5	GO:0006909	phagocytosis	Biological Process	2	B4DT46, P52735
5	GO:0044283	small molecule biosynthetic process	Biological Process	5	O00767, O75438, B4DE67, B3KRC6, P07311
5	GO:0010594	regulation of endothelial cell migration	Biological Process	2	Q5JR08, P08581
5	GO:1902275	regulation of chromatin organization	Biological Process	3	Q96T88, A5YRV2, P17096
5	GO:0007599	hemostasis	Biological Process	3	Q5TEC6, Q5JR08, P52735
5	GO:0002009	morphogenesis of an epithelium	Biological Process	3	Q5JR08, P08581, O15230
5	GO:0043436	oxoacid metabolic process	Biological Process	7	O00767, Q09472, H0UI22, B4DE67, B3KRC6, Q6QN92, P07311
5	GO:1901342	regulation of vasculature development	Biological Process	1	Q5JR08
5	GO:0055123	digestive system development	Biological Process	1	A0A024R8K7
5	GO:0032870	cellular response to hormone stimulus	Biological Process	1	Q09472
5	GO:0031936	negative regulation of chromatin silencing	Biological Process	1	P17096
5	GO:0072524	pyridine-containing compound metabolic process	Biological Process	1	P07311
5	GO:0016042	lipid catabolic process	Biological Process	1	B4DE48
5	GO:0052312	modulation of transcription in other organism involved in symbiotic interaction	Biological Process	1	Q09472
5	GO:0044784	metaphase/anaphase transition of cell cycle	Biological Process	1	B2R841
5	GO:0006461	protein complex assembly	Biological Process	9	Q9H5M4, Q5TEC6, O75438, Q09472, B2R4U3, B4DT46, P17096, B0AZV9, O43678
5	GO:0051650	establishment of vesicle localization	Biological Process	1	B0AZV9
5	GO:0051439	regulation of ubiquitin-protein ligase activity involved in mitotic cell cycle	Biological Process	2	B2R841, B2R4U3
5	GO:0031344	regulation of cell projection organization	Biological Process	2	Q5JR08, Q75MX0
5	GO:0006900	membrane budding	Biological Process	1	B0AZV9
5	GO:0007067	mitotic nuclear division	Biological Process	4	Q5JR08, B2R841, B2R4U3, D3DR37
5	GO:0044782	cilium organization	Biological Process	2	Q9H5M4, B4DYY3
5	GO:0048545	response to steroid hormone	Biological Process	1	Q09472
5	GO:1900024	regulation of substrate adhesion-dependent cell spreading	Biological Process	1	P08582
5	GO:0050769	positive regulation of neurogenesis	Biological Process	1	Q5JR08
5	GO:1903900	regulation of viral life cycle	Biological Process	1	Q09472
5	GO:0010470	regulation of gastrulation	Biological Process	1	A0A024R2W4
5	GO:0006811	ion transport	Biological Process	7	O75438, Q6PJ25, P08582, A0A0A0MTB0, A0A097PY54, D6RIZ4, Q9HBR0
5	GO:0050766	positive regulation of phagocytosis	Biological Process	1	B4DT46
5	GO:0031669	cellular response to nutrient levels	Biological Process	1	A0A087X1T2
5	GO:1901293	nucleoside phosphate biosynthetic process	Biological Process	2	A0A097PY54, A0A140VJE0
5	GO:0072395	signal transduction involved in cell cycle checkpoint	Biological Process	2	Q09472, A5YRV2
5	GO:1903955	positive regulation of protein targeting to mitochondrion	Biological Process	2	B2R4N3, A0A087X1T2
5	GO:0000236	mitotic prometaphase	Biological Process	1	B2R841
5	GO:0044843	cell cycle G1/S phase transition	Biological Process	2	Q09472, A5YRV2
5	GO:0032467	positive regulation of cytokinesis	Biological Process	1	Q5JR08
5	GO:0019693	ribose phosphate metabolic process	Biological Process	4	O75438, A0A097PY54, O43678, P07311
5	GO:0006119	oxidative phosphorylation	Biological Process	2	O75438, O43678
5	GO:0010721	negative regulation of cell development	Biological Process	3	Q5JR08, P08582, Q75MX0
5	GO:1900034	regulation of cellular response to heat	Biological Process	1	Q09472
5	GO:0030168	platelet activation	Biological Process	2	Q5JR08, P52735
5	GO:0050919	negative chemotaxis	Biological Process	1	Q5JR08
5	GO:0031648	protein destabilization	Biological Process	1	B2R841
5	GO:0042476	odontogenesis	Biological Process	1	A0A024R8K7
5	GO:0006658	phosphatidylserine metabolic process	Biological Process	1	A0A0A0MTB0
5	GO:1902533	positive regulation of intracellular signal transduction	Biological Process	2	Q5JR08, P08581
5	GO:0009059	macromolecule biosynthetic process	Biological Process	31	Q09472, Q5TEC6, Q9BVP2, Q6DKI1, A0A087X1T2, P62081, Q96T88, P08581, B2R841, H0UI22, P62273, P17096, P62857, A0A024R2W4, F1JVV5, Q6FHK1, P82914, C9JCN8, Q92604, Q8N4P8, A0A024RDF4, J3QR09, Q9Y6H1, B3KS36, F8VZJ2, P62861, Q6IAM0, P63173, P83881, A5YRV2, P62269
5	GO:1901652	response to peptide	Biological Process	1	A8KAQ3
5	GO:0055098	response to low-density lipoprotein particle	Biological Process	1	A0A087X1T2
5	GO:0007369	gastrulation	Biological Process	2	A0A024R8K7, A0A024R2W4
5	GO:0007569	cell aging	Biological Process	1	P17096
5	GO:0034645	cellular macromolecule biosynthetic process	Biological Process	31	Q09472, Q5TEC6, Q9BVP2, Q6DKI1, A0A087X1T2, P62081, Q96T88, P08581, B2R841, H0UI22, P62273, P17096, P62857, A0A024R2W4, F1JVV5, Q6FHK1, P82914, C9JCN8, Q92604, Q8N4P8, A0A024RDF4, J3QR09, Q9Y6H1, B3KS36, F8VZJ2, P62861, Q6IAM0, P63173, P83881, A5YRV2, P62269
5	GO:1904029	regulation of cyclin-dependent protein kinase activity	Biological Process	2	Q8N4P8, B2R841
5	GO:0032675	regulation of interleukin-6 production	Biological Process	1	B4DT46
5	GO:0012501	programmed cell death	Biological Process	9	B6CGU5, Q09472, Q5JR08, P08581, B2R841, A5YRV2, P52735, A8KAQ3, F6TR53
5	GO:0071158	positive regulation of cell cycle arrest	Biological Process	2	Q09472, A5YRV2
5	GO:2001197	basement membrane assembly involved in embryonic body morphogenesis	Biological Process	1	A0A024R2W4
5	GO:0044724	single-organism carbohydrate catabolic process	Biological Process	1	P07311
5	GO:0055085	transmembrane transport	Biological Process	3	A0A097PY54, D6RIZ4, Q9HBR0
5	GO:0032507	maintenance of protein location in cell	Biological Process	1	A0A024R2W4
5	GO:0090304	nucleic acid metabolic process	Biological Process	41	O95478, Q13895, Q09472, Q5TEC6, Q8NEF9, Q6DKI1, Q9BVP2, A0A087X1T2, Q5VV42, P62081, Q9H9Y2, B2R823, Q96T88, P08581, B2R841, H0UI22, P62273, B2R4U3, P17096, P62857, Q96GA3, F1JVV5, C9JCN8, Q12872, Q8N4P8, A0A024RDF4, J3QR09, Q8IY37, Q9Y6H1, B3KS36, Q5JXX1, Q9NY93, F8VZJ2, Q9BVJ6, P62861, P63173, P83881, A5YRV2, A8K7D9, P62269, A8K201
5	GO:0016051	carbohydrate biosynthetic process	Biological Process	1	P07311
5	GO:0002758	innate immune response-activating signal transduction	Biological Process	2	Q09472, B4DT46
5	GO:0042384	cilium assembly	Biological Process	2	Q9H5M4, B4DYY3
5	GO:0070848	response to growth factor	Biological Process	2	Q5JR08, A8KAQ3
5	GO:0018130	heterocycle biosynthetic process	Biological Process	23	Q09472, Q5TEC6, C9JCN8, Q9BVP2, A0A087X1T2, A0A097PY54, J3QR09, P62081, Q9Y6H1, F8VZJ2, Q96T88, P62861, P08581, P63173, B2R841, A5YRV2, P62273, P83881, P17096, A0A140VJE0, P62857, P62269, F1JVV5
5	GO:0051225	spindle assembly	Biological Process	2	Q5JR08, B2R841
5	GO:0097485	neuron projection guidance	Biological Process	1	Q75MX0
5	GO:0010629	negative regulation of gene expression	Biological Process	9	Q09472, Q5TEC6, Q96T88, B2R841, A0A087X1T2, A5YRV2, A0A024RDF4, P17096, F1JVV5
5	GO:0045931	positive regulation of mitotic cell cycle	Biological Process	1	B2R4U3
5	GO:0034250	positive regulation of cellular amide metabolic process	Biological Process	1	A0A024RDF4
5	GO:1902882	regulation of response to oxidative stress	Biological Process	1	P08581
5	GO:0071826	ribonucleoprotein complex subunit organization	Biological Process	3	Q12872, P63173, H3BMQ2
5	GO:0002385	mucosal immune response	Biological Process	1	P62861
5	GO:0042060	wound healing	Biological Process	3	Q5TEC6, Q5JR08, P52735
5	GO:0019081	viral translation	Biological Process	1	Q6IAM0
5	GO:0009416	response to light stimulus	Biological Process	1	Q09472
5	GO:0032372	negative regulation of sterol transport	Biological Process	1	A0A087X1T2
5	GO:0002040	sprouting angiogenesis	Biological Process	1	Q5JR08
5	GO:1902667	regulation of axon guidance	Biological Process	1	Q75MX0
5	GO:0072657	protein localization to membrane	Biological Process	9	P62861, P63173, P62273, P83881, J3QR09, P62081, P62857, P62269, B4DYY3
5	GO:0030036	actin cytoskeleton organization	Biological Process	1	Q5JR08
5	GO:0017038	protein import	Biological Process	2	A0A024R2W4, A8K7D9
5	GO:0007016	cytoskeletal anchoring at plasma membrane	Biological Process	1	A0A024R2W4
5	GO:0006066	alcohol metabolic process	Biological Process	3	O75911, B3KRC6, B4DE48
5	GO:0030517	negative regulation of axon extension	Biological Process	1	Q75MX0
5	GO:0000302	response to reactive oxygen species	Biological Process	3	Q5JR08, P08581, B4DT46
5	GO:0015850	organic hydroxy compound transport	Biological Process	2	A0A087X1T2, D6RIZ4
5	GO:0071705	nitrogen compound transport	Biological Process	4	Q6PJ25, A0A0A0MTB0, A0A024RDF4, Q9HBR0
5	GO:1902402	signal transduction involved in mitotic DNA damage checkpoint	Biological Process	2	Q09472, A5YRV2
5	GO:0009072	aromatic amino acid family metabolic process	Biological Process	1	B5BU78
5	GO:0045732	positive regulation of protein catabolic process	Biological Process	2	B2R841, B2R4U3
5	GO:1901605	alpha-amino acid metabolic process	Biological Process	6	Q9H5M4, Q09472, H0UI22, B2R841, Q6QN92, B5BU78
5	GO:0032459	regulation of protein oligomerization	Biological Process	1	Q5TEC6
5	GO:0033043	regulation of organelle organization	Biological Process	6	B2R4N3, Q5JR08, B2R841, A0A087X1T2, Q9BVP2, B2R4U3
5	GO:0018342	protein prenylation	Biological Process	1	P53609
5	GO:1901661	quinone metabolic process	Biological Process	1	O75438
5	GO:0048864	stem cell development	Biological Process	1	Q75MX0
5	GO:0044282	small molecule catabolic process	Biological Process	3	Q09472, B4DE48, Q6QN92
5	GO:0043038	amino acid activation	Biological Process	1	H0UI22
5	GO:1903902	positive regulation of viral life cycle	Biological Process	1	Q09472
5	GO:0010467	gene expression	Biological Process	44	O95478, Q13895, Q09472, Q5TEC6, Q8NEF9, Q6DKI1, Q9BVP2, A0A087X1T2, P62081, Q5VV42, P52735, A8KAQ3, Q9H9Y2, B2R823, Q5JR08, Q96T88, P08581, B2R841, P08582, H0UI22, P62273, P17096, P62857, Q96GA3, F1JVV5, Q6FHK1, P82914, C9JCN8, Q12872, A0A024RDF4, J3QR09, Q8IY37, Q9Y6H1, B3KS36, Q9NY93, F8VZJ2, P62861, Q9BVJ6, Q6IAM0, P63173, P83881, A5YRV2, P62269, A8K201
5	GO:0033045	regulation of sister chromatid segregation	Biological Process	1	B2R841
5	GO:1900407	regulation of cellular response to oxidative stress	Biological Process	1	P08581
5	GO:0006954	inflammatory response	Biological Process	1	B4DT46
5	GO:0007160	cell-matrix adhesion	Biological Process	1	A0A024R8K7
5	GO:1903008	organelle disassembly	Biological Process	1	A0A087X1T2
5	GO:0030397	membrane disassembly	Biological Process	1	B2R841
5	GO:0006560	proline metabolic process	Biological Process	1	H0UI22
5	GO:0090407	organophosphate biosynthetic process	Biological Process	3	Q92604, A0A097PY54, A0A140VJE0
5	GO:0010992	ubiquitin homeostasis	Biological Process	1	B2R4U3
5	GO:0009112	nucleobase metabolic process	Biological Process	1	A0A140VJE0
5	GO:0046794	transport of virus	Biological Process	1	A8K7D9
5	GO:1901213	regulation of transcription from RNA polymerase II promoter involved in heart development	Biological Process	1	F8VZJ2
5	GO:0034329	cell junction assembly	Biological Process	3	Q5JR08, A0A024R8K7, O15230
5	GO:0051254	positive regulation of RNA metabolic process	Biological Process	10	Q09472, C9JCN8, Q96T88, P08581, Q9BVP2, A0A087X1T2, A5YRV2, P17096, Q9Y6H1, F1JVV5
5	GO:0006637	acyl-CoA metabolic process	Biological Process	1	O00767
5	GO:0010595	positive regulation of endothelial cell migration	Biological Process	2	Q5JR08, P08581
5	GO:0050821	protein stabilization	Biological Process	1	Q8N4P8
5	GO:0002474	antigen processing and presentation of peptide antigen via MHC class I	Biological Process	1	B4DT46
5	GO:0043393	regulation of protein binding	Biological Process	2	Q8N4P8, B2R841
5	GO:1905114	cell surface receptor signaling pathway involved in cell-cell signaling	Biological Process	2	Q9H5M4, Q5JR08
5	GO:1901987	regulation of cell cycle phase transition	Biological Process	4	Q09472, B2R841, A5YRV2, B2R4U3
5	GO:0051246	regulation of protein metabolic process	Biological Process	15	B6CGU5, Q9H5M4, Q09472, Q8N4P8, Q9BVP2, A0A024RDF4, Q5JR08, Q96T88, Q6IAM0, P08581, B2R841, P08582, B2R4U3, A5YRV2, A0A024R2W4
5	GO:0090150	establishment of protein localization to membrane	Biological Process	9	P62861, P63173, P62273, P83881, J3QR09, P62081, P62857, P62269, B4DYY3
5	GO:0006518	peptide metabolic process	Biological Process	16	P82914, Q6DKI1, A0A024RDF4, J3QR09, P62081, B3KS36, F8VZJ2, Q6IAM0, P62861, P63173, H0UI22, P62273, P83881, P62857, P62269, Q6FHK1
5	GO:0043413	macromolecule glycosylation	Biological Process	2	A5YRV2, A0A024R2W4
5	GO:0051100	negative regulation of binding	Biological Process	1	Q8N4P8
5	GO:0010563	negative regulation of phosphorus metabolic process	Biological Process	2	B2R841, A0A024R2W4
5	GO:0085029	extracellular matrix assembly	Biological Process	1	A0A024R2W4
5	GO:0038096	Fc-gamma receptor signaling pathway involved in phagocytosis	Biological Process	1	P52735
5	GO:0061387	regulation of extent of cell growth	Biological Process	1	Q75MX0
5	GO:0006631	fatty acid metabolic process	Biological Process	1	O00767
5	GO:0046700	heterocycle catabolic process	Biological Process	8	P62861, P63173, P62273, P83881, J3QR09, P62081, P62857, P62269
5	GO:0010812	negative regulation of cell-substrate adhesion	Biological Process	1	P08582
5	GO:0045765	regulation of angiogenesis	Biological Process	1	Q5JR08
5	GO:0007077	mitotic nuclear envelope disassembly	Biological Process	1	B2R841
5	GO:0044003	modification by symbiont of host morphology or physiology	Biological Process	2	A0A024R2W4, A8K7D9
5	GO:0048754	branching morphogenesis of an epithelial tube	Biological Process	1	P08581
5	GO:0042181	ketone biosynthetic process	Biological Process	1	O75438
5	GO:0022618	ribonucleoprotein complex assembly	Biological Process	3	Q12872, P63173, H3BMQ2
5	GO:0033993	response to lipid	Biological Process	1	Q09472
5	GO:0006974	cellular response to DNA damage stimulus	Biological Process	7	Q09472, Q5TEC6, B2R841, A5YRV2, B2R4U3, P17096, Q5JXX1
5	GO:0090398	cellular senescence	Biological Process	1	P17096
5	GO:0030177	positive regulation of Wnt signaling pathway	Biological Process	1	Q9H5M4
5	GO:0010771	negative regulation of cell morphogenesis involved in differentiation	Biological Process	3	Q5JR08, P08582, Q75MX0
5	GO:0060485	mesenchyme development	Biological Process	2	A0A024R2W4, Q75MX0
5	GO:0048858	cell projection morphogenesis	Biological Process	4	Q9H5M4, Q5JR08, B4DYY3, Q75MX0
5	GO:0050658	RNA transport	Biological Process	1	A0A024RDF4
5	GO:1901566	organonitrogen compound biosynthetic process	Biological Process	18	P82914, Q6DKI1, A0A024RDF4, A0A097PY54, J3QR09, P62081, B3KS36, F8VZJ2, P62861, Q6IAM0, P63173, H0UI22, P62273, P83881, P62857, A0A140VJE0, P62269, Q6FHK1
5	GO:0031345	negative regulation of cell projection organization	Biological Process	2	Q5JR08, Q75MX0
5	GO:0006998	nuclear envelope organization	Biological Process	1	B2R841
5	GO:0007166	cell surface receptor signaling pathway	Biological Process	11	B6CGU5, Q9H5M4, Q09472, Q5JR08, P08581, A0A024R8K7, O15230, B4DT46, P52735, A8KAQ3, Q75MX0
5	GO:0006665	sphingolipid metabolic process	Biological Process	1	A0A0A0MTB0
5	GO:0019731	antibacterial humoral response	Biological Process	1	P62861
5	GO:0043588	skin development	Biological Process	2	A0A024R8K7, B1ALI9
5	GO:0051336	regulation of hydrolase activity	Biological Process	5	B6CGU5, Q5JR08, Q96T88, P52735, A8KAQ3
5	GO:0016125	sterol metabolic process	Biological Process	2	B3KRC6, B4DE48
5	GO:0032755	positive regulation of interleukin-6 production	Biological Process	1	B4DT46
5	GO:0045736	negative regulation of cyclin-dependent protein serine/threonine kinase activity	Biological Process	1	B2R841
5	GO:0010994	free ubiquitin chain polymerization	Biological Process	1	B2R4U3
5	GO:0006342	chromatin silencing	Biological Process	2	Q5TEC6, P17096
5	GO:0032465	regulation of cytokinesis	Biological Process	1	Q5JR08
5	GO:0035384	thioester biosynthetic process	Biological Process	1	O00767
5	GO:0000090	mitotic anaphase	Biological Process	2	B2R841, B2R4U3
5	GO:1903557	positive regulation of tumor necrosis factor superfamily cytokine production	Biological Process	1	B4DT46
5	GO:0008333	endosome to lysosome transport	Biological Process	2	Q5JR08, A8KAQ3
5	GO:0045088	regulation of innate immune response	Biological Process	2	Q09472, B4DT46
5	GO:0008643	carbohydrate transport	Biological Process	1	A8KAQ3
5	GO:0000278	mitotic cell cycle	Biological Process	8	Q9H5M4, Q09472, Q5JR08, B2R841, A5YRV2, B2R4U3, D3DR37, O43805
5	GO:0006888	ER to Golgi vesicle-mediated transport	Biological Process	2	B0AZV9, A6NLH6
5	GO:0001894	tissue homeostasis	Biological Process	1	B4DYY3
5	GO:2000181	negative regulation of blood vessel morphogenesis	Biological Process	1	Q5JR08
5	GO:0051604	protein maturation	Biological Process	1	P08582
5	GO:0030522	intracellular receptor signaling pathway	Biological Process	1	Q09472
5	GO:0021762	substantia nigra development	Biological Process	1	Q5JR08
5	GO:0051492	regulation of stress fiber assembly	Biological Process	1	Q5JR08
5	GO:1900037	regulation of cellular response to hypoxia	Biological Process	1	Q9Y6H1
5	GO:0044839	cell cycle G2/M phase transition	Biological Process	2	B2R841, O43805
5	GO:0042273	ribosomal large subunit biogenesis	Biological Process	2	Q6DKI1, Q9H9Y2
5	GO:0006544	glycine metabolic process	Biological Process	1	Q6QN92
5	GO:0007088	regulation of mitotic nuclear division	Biological Process	2	B2R841, B2R4U3
5	GO:0030163	protein catabolic process	Biological Process	3	Q96T88, B2R841, B2R4U3
5	GO:0007346	regulation of mitotic cell cycle	Biological Process	4	Q09472, B2R841, A5YRV2, B2R4U3
5	GO:0000165	MAPK cascade	Biological Process	2	P08581, A0A024R2W4
5	GO:0036089	cleavage furrow formation	Biological Process	1	Q5JR08
5	GO:1903202	negative regulation of oxidative stress-induced cell death	Biological Process	1	P08581
5	GO:0000087	mitotic M phase	Biological Process	2	B2R841, B2R4U3
5	GO:0010885	regulation of cholesterol storage	Biological Process	1	A0A087X1T2
5	GO:1902400	intracellular signal transduction involved in G1 DNA damage checkpoint	Biological Process	2	Q09472, A5YRV2
5	GO:0043068	positive regulation of programmed cell death	Biological Process	3	B6CGU5, Q5JR08, P52735
5	GO:0072359	circulatory system development	Biological Process	3	Q5JR08, F8VZJ2, Q75MX0
5	GO:0044271	cellular nitrogen compound biosynthetic process	Biological Process	30	Q09472, Q5TEC6, Q9BVP2, Q6DKI1, A0A087X1T2, P62081, Q96T88, P08581, B2R841, H0UI22, P62273, P17096, P62857, A0A140VJE0, F1JVV5, Q6FHK1, P82914, C9JCN8, A0A024RDF4, A0A097PY54, J3QR09, Q9Y6H1, B3KS36, F8VZJ2, P62861, Q6IAM0, P63173, P83881, A5YRV2, P62269
5	GO:0006869	lipid transport	Biological Process	2	Q6PJ25, A0A087X1T2
5	GO:0051052	regulation of DNA metabolic process	Biological Process	3	Q8N4P8, Q9BVP2, A8K7D9
5	GO:0006818	hydrogen transport	Biological Process	2	O75438, A0A097PY54
5	GO:0006446	regulation of translational initiation	Biological Process	1	Q6IAM0
5	GO:0043412	macromolecule modification	Biological Process	15	Q9H5M4, Q09472, Q8N4P8, Q9BVP2, Q5VV42, Q5JXX1, B5BU78, Q5JR08, Q96T88, P08581, B2R841, B2R4U3, A5YRV2, P53609, A0A024R2W4
5	GO:0015031	protein transport	Biological Process	16	A0A024R7S3, A0A087X1T2, J3QR09, P62081, B4DE48, B2R4N3, Q5JR08, P62861, P63173, P62273, P83881, P62857, A0A024R2W4, A8K7D9, P62269, B4DYY3
5	GO:0022617	extracellular matrix disassembly	Biological Process	1	P08582
5	GO:0042274	ribosomal small subunit biogenesis	Biological Process	2	P62081, P62857
5	GO:0060173	limb development	Biological Process	1	A0A024R8K7
5	GO:0010639	negative regulation of organelle organization	Biological Process	1	B2R841
5	GO:0016192	vesicle-mediated transport	Biological Process	9	Q9H5M4, A0A024R7S3, Q03169, B4DT46, B0AZV9, A6NLH6, P52735, B4DE48, A8KAQ3
5	GO:0045165	cell fate commitment	Biological Process	1	O00458
5	GO:0042542	response to hydrogen peroxide	Biological Process	2	Q5JR08, P08581
5	GO:0032990	cell part morphogenesis	Biological Process	4	Q9H5M4, Q5JR08, B4DYY3, Q75MX0
5	GO:0042742	defense response to bacterium	Biological Process	2	P62861, B4DT46
5	GO:0006493	protein O-linked glycosylation	Biological Process	2	A5YRV2, A0A024R2W4
5	GO:0032386	regulation of intracellular transport	Biological Process	3	B2R4N3, Q5JR08, A0A087X1T2
5	GO:0051303	establishment of chromosome localization	Biological Process	1	D3DR37
5	GO:0010468	regulation of gene expression	Biological Process	20	Q09472, Q5TEC6, C9JCN8, Q12872, Q9BVP2, A0A087X1T2, A0A024RDF4, P52735, Q9Y6H1, A8KAQ3, F8VZJ2, Q5JR08, Q96T88, Q6IAM0, P08581, B2R841, P08582, A5YRV2, P17096, F1JVV5
5	GO:0071560	cellular response to transforming growth factor beta stimulus	Biological Process	1	Q5JR08
5	GO:0032956	regulation of actin cytoskeleton organization	Biological Process	1	Q5JR08
5	GO:0033046	negative regulation of sister chromatid segregation	Biological Process	1	B2R841
5	GO:0044265	cellular macromolecule catabolic process	Biological Process	11	P62861, Q96T88, P63173, B2R841, B2R4U3, P62273, P83881, J3QR09, P62081, P62857, P62269
5	GO:0044772	mitotic cell cycle phase transition	Biological Process	5	Q09472, B2R841, B2R4U3, A5YRV2, O43805
5	GO:0098792	xenophagy	Biological Process	1	Q5TEC6
5	GO:0000819	sister chromatid segregation	Biological Process	2	B2R841, D3DR37
5	GO:0007009	plasma membrane organization	Biological Process	1	B4DYY3
5	GO:0051017	actin filament bundle assembly	Biological Process	1	Q5JR08
5	GO:0051174	regulation of phosphorus metabolic process	Biological Process	5	Q5JR08, P08581, Q8N4P8, B2R841, A0A024R2W4
5	GO:1904261	positive regulation of basement membrane assembly involved in embryonic body morphogenesis	Biological Process	1	A0A024R2W4
5	GO:0031333	negative regulation of protein complex assembly	Biological Process	1	Q5TEC6
5	GO:0045995	regulation of embryonic development	Biological Process	2	O15230, A0A024R2W4
5	GO:1903426	regulation of reactive oxygen species biosynthetic process	Biological Process	1	B4DT46
5	GO:1903827	regulation of cellular protein localization	Biological Process	5	B2R4N3, Q5JR08, B2R841, A0A087X1T2, Q9BVP2
5	GO:0034599	cellular response to oxidative stress	Biological Process	2	Q5JR08, P08581
5	GO:1903201	regulation of oxidative stress-induced cell death	Biological Process	1	P08581
5	GO:0034137	positive regulation of toll-like receptor 2 signaling pathway	Biological Process	1	B4DT46
5	GO:0032368	regulation of lipid transport	Biological Process	1	A0A087X1T2
5	GO:0031346	positive regulation of cell projection organization	Biological Process	1	Q5JR08
5	GO:0071824	protein-DNA complex subunit organization	Biological Process	2	Q5TEC6, P17096
5	GO:0000226	microtubule cytoskeleton organization	Biological Process	4	Q9H5M4, Q5JR08, B2R841, A0A024R2W4
5	GO:1901988	negative regulation of cell cycle phase transition	Biological Process	3	Q09472, B2R841, A5YRV2
5	GO:0050688	regulation of defense response to virus	Biological Process	1	Q5TEC6
5	GO:2001028	positive regulation of endothelial cell chemotaxis	Biological Process	1	P08581
5	GO:0051306	mitotic sister chromatid separation	Biological Process	1	B2R841
5	GO:2001234	negative regulation of apoptotic signaling pathway	Biological Process	1	A5YRV2
5	GO:0034655	nucleobase-containing compound catabolic process	Biological Process	8	P62861, P63173, P62273, P83881, J3QR09, P62081, P62857, P62269
5	GO:0031577	spindle checkpoint	Biological Process	1	B2R841
5	GO:0043094	cellular metabolic compound salvage	Biological Process	1	A0A140VJE0
5	GO:0051496	positive regulation of stress fiber assembly	Biological Process	1	Q5JR08
5	GO:0010911	regulation of isomerase activity	Biological Process	1	Q96T88
5	GO:0051253	negative regulation of RNA metabolic process	Biological Process	7	Q09472, Q5TEC6, Q96T88, B2R841, A0A087X1T2, A5YRV2, P17096
5	GO:1902532	negative regulation of intracellular signal transduction	Biological Process	2	A5YRV2, A0A024R2W4
5	GO:0016070	RNA metabolic process	Biological Process	37	O95478, Q13895, Q09472, Q5TEC6, Q8NEF9, Q6DKI1, Q9BVP2, A0A087X1T2, Q5VV42, P62081, Q9H9Y2, B2R823, Q96T88, P08581, B2R841, H0UI22, P62273, P17096, P62857, Q96GA3, F1JVV5, C9JCN8, Q12872, A0A024RDF4, J3QR09, Q8IY37, Q9Y6H1, Q9NY93, B3KS36, F8VZJ2, Q9BVJ6, P62861, P63173, P83881, A5YRV2, P62269, A8K201
5	GO:0051648	vesicle localization	Biological Process	1	B0AZV9
5	GO:1901032	negative regulation of response to reactive oxygen species	Biological Process	1	P08581
5	GO:0019058	viral life cycle	Biological Process	11	Q09472, Q6IAM0, P62861, P63173, P62273, P83881, J3QR09, P62081, P62857, A8K7D9, P62269
5	GO:0050918	positive chemotaxis	Biological Process	1	P08581
5	GO:0043086	negative regulation of catalytic activity	Biological Process	3	B2R841, B2R4U3, A8KAQ3
5	GO:0051252	regulation of RNA metabolic process	Biological Process	15	Q5TEC6, Q09472, C9JCN8, Q12872, Q9BVP2, A0A087X1T2, A0A024RDF4, Q9Y6H1, F8VZJ2, Q96T88, P08581, B2R841, A5YRV2, P17096, F1JVV5
5	GO:0002227	innate immune response in mucosa	Biological Process	1	P62861
5	GO:0031175	neuron projection development	Biological Process	2	Q5JR08, Q75MX0
5	GO:0002064	epithelial cell development	Biological Process	1	P08581
5	GO:0032269	negative regulation of cellular protein metabolic process	Biological Process	4	Q8N4P8, B2R841, B2R4U3, A0A024R2W4
5	GO:0007186	G-protein coupled receptor signaling pathway	Biological Process	1	A8KAQ3
5	GO:0033143	regulation of intracellular steroid hormone receptor signaling pathway	Biological Process	1	Q09472
5	GO:0006997	nucleus organization	Biological Process	2	B2R841, D3DR37
5	GO:0090132	epithelium migration	Biological Process	3	Q5JR08, P08581, B5BU78
5	GO:0042254	ribosome biogenesis	Biological Process	22	O95478, Q13895, P82914, Q6DKI1, J3QR09, P62081, Q8IY37, B3KS36, Q9NY93, Q9H9Y2, B2R823, Q9BVJ6, P62861, P63173, P62273, P83881, P62857, P62269, A8K201, H3BMQ2, Q96GA3, Q6FHK1
5	GO:0015748	organophosphate ester transport	Biological Process	1	Q6PJ25
5	GO:0007010	cytoskeleton organization	Biological Process	4	Q9H5M4, Q5JR08, B2R841, A0A024R2W4
5	GO:0016050	vesicle organization	Biological Process	2	B0AZV9, A8KAQ3
5	GO:0009116	nucleoside metabolic process	Biological Process	5	O75438, A0A097PY54, O43678, A0A140VJE0, P07311
5	GO:0043067	regulation of programmed cell death	Biological Process	8	B6CGU5, Q09472, Q5JR08, P08581, B2R841, A5YRV2, P52735, F6TR53
5	GO:0007034	vacuolar transport	Biological Process	3	Q5JR08, B4DE48, A8KAQ3
5	GO:1900025	negative regulation of substrate adhesion-dependent cell spreading	Biological Process	1	P08582
5	GO:0048332	mesoderm morphogenesis	Biological Process	1	A0A024R8K7
5	GO:2001026	regulation of endothelial cell chemotaxis	Biological Process	1	P08581
5	GO:0006325	chromatin organization	Biological Process	6	Q09472, Q5TEC6, Q96T88, A5YRV2, P17096, Q5JXX1
5	GO:0042692	muscle cell differentiation	Biological Process	2	O00458, A8KAQ3
5	GO:0071822	protein complex subunit organization	Biological Process	11	Q9H5M4, P82914, O75438, Q5TEC6, Q09472, B2R4U3, P17096, B4DT46, B0AZV9, O43678, Q6FHK1
5	GO:0030334	regulation of cell migration	Biological Process	6	Q5JR08, Q8N4P8, P08581, O15230, A0A024R2W4, Q75MX0
5	GO:0019043	establishment of viral latency	Biological Process	1	P17096
5	GO:1901616	organic hydroxy compound catabolic process	Biological Process	1	B4DE48
5	GO:0031347	regulation of defense response	Biological Process	3	Q09472, Q5TEC6, B4DT46
5	GO:0010562	positive regulation of phosphorus metabolic process	Biological Process	3	Q5JR08, P08581, B2R841
5	GO:1901989	positive regulation of cell cycle phase transition	Biological Process	1	B2R4U3
5	GO:0010720	positive regulation of cell development	Biological Process	1	Q5JR08
5	GO:0010770	positive regulation of cell morphogenesis involved in differentiation	Biological Process	1	Q5JR08
5	GO:0010324	membrane invagination	Biological Process	1	Q5JR08
5	GO:0009597	detection of virus	Biological Process	1	A0A0A0MTB0
5	GO:0006566	threonine metabolic process	Biological Process	1	Q6QN92
5	GO:0006259	DNA metabolic process	Biological Process	9	Q5TEC6, Q09472, Q96T88, Q8N4P8, Q9BVP2, B2R4U3, P17096, A8K7D9, Q5JXX1
5	GO:0060249	anatomical structure homeostasis	Biological Process	3	Q5TEC6, Q9BVP2, B4DYY3
5	GO:0031935	regulation of chromatin silencing	Biological Process	1	P17096
5	GO:0007596	blood coagulation	Biological Process	3	Q5JR08, Q5TEC6, P52735
5	GO:0019438	aromatic compound biosynthetic process	Biological Process	23	Q09472, Q5TEC6, C9JCN8, Q9BVP2, A0A087X1T2, A0A097PY54, J3QR09, P62081, Q9Y6H1, F8VZJ2, Q96T88, P62861, P08581, P63173, B2R841, A5YRV2, P62273, P83881, P17096, A0A140VJE0, P62857, P62269, F1JVV5
5	GO:0045839	negative regulation of mitotic nuclear division	Biological Process	1	B2R841
5	GO:0008366	axon ensheathment	Biological Process	1	A0A0A0MTB0
5	GO:0071706	tumor necrosis factor superfamily cytokine production	Biological Process	1	B4DT46
5	GO:0071478	cellular response to radiation	Biological Process	2	Q5JR08, Q09472
5	GO:0032268	regulation of cellular protein metabolic process	Biological Process	15	B6CGU5, Q9H5M4, Q09472, Q8N4P8, Q9BVP2, A0A024RDF4, Q5JR08, Q96T88, Q6IAM0, P08581, B2R841, P08582, B2R4U3, A5YRV2, A0A024R2W4
5	GO:1903555	regulation of tumor necrosis factor superfamily cytokine production	Biological Process	1	B4DT46
5	GO:0051053	negative regulation of DNA metabolic process	Biological Process	1	Q8N4P8
6	GO:0006554	lysine catabolic process	Biological Process	1	Q09472
6	GO:0043549	regulation of kinase activity	Biological Process	4	Q5JR08, Q8N4P8, P08581, B2R841
6	GO:0006915	apoptotic process	Biological Process	8	B6CGU5, Q09472, Q5JR08, B2R841, A5YRV2, P52735, A8KAQ3, F6TR53
6	GO:2001243	negative regulation of intrinsic apoptotic signaling pathway	Biological Process	1	A5YRV2
6	GO:0006820	anion transport	Biological Process	3	A0A0A0MTB0, D6RIZ4, Q9HBR0
6	GO:0050764	regulation of phagocytosis	Biological Process	1	B4DT46
6	GO:0016485	protein processing	Biological Process	1	P08582
6	GO:0051259	protein oligomerization	Biological Process	1	Q5TEC6
6	GO:0032091	negative regulation of protein binding	Biological Process	1	Q8N4P8
6	GO:0001755	neural crest cell migration	Biological Process	1	Q75MX0
6	GO:1902593	single-organism nuclear import	Biological Process	2	A0A024R2W4, A8K7D9
6	GO:0010769	regulation of cell morphogenesis involved in differentiation	Biological Process	3	Q5JR08, P08582, Q75MX0
6	GO:0051783	regulation of nuclear division	Biological Process	2	B2R841, B2R4U3
6	GO:0043401	steroid hormone mediated signaling pathway	Biological Process	1	Q09472
6	GO:0043409	negative regulation of MAPK cascade	Biological Process	1	A0A024R2W4
6	GO:0072331	signal transduction by p53 class mediator	Biological Process	2	Q09472, A5YRV2
6	GO:0006355	regulation of transcription, DNA-templated	Biological Process	13	Q09472, Q5TEC6, C9JCN8, A0A087X1T2, Q9BVP2, Q9Y6H1, F8VZJ2, Q96T88, P08581, B2R841, A5YRV2, P17096, F1JVV5
6	GO:0015807	L-amino acid transport	Biological Process	1	A0A0A0MTB0
6	GO:0006606	protein import into nucleus	Biological Process	2	A0A024R2W4, A8K7D9
6	GO:0071173	spindle assembly checkpoint	Biological Process	1	B2R841
6	GO:0034135	regulation of toll-like receptor 2 signaling pathway	Biological Process	1	B4DT46
6	GO:0032774	RNA biosynthetic process	Biological Process	21	Q5TEC6, Q09472, C9JCN8, Q9BVP2, A0A087X1T2, J3QR09, P62081, Q9Y6H1, F8VZJ2, Q96T88, P62861, P63173, P08581, B2R841, A5YRV2, P62273, P83881, P17096, P62857, P62269, F1JVV5
6	GO:0007043	cell-cell junction assembly	Biological Process	1	Q5JR08
6	GO:0002221	pattern recognition receptor signaling pathway	Biological Process	1	B4DT46
6	GO:0006650	glycerophospholipid metabolic process	Biological Process	2	Q92604, A0A0A0MTB0
6	GO:0007156	homophilic cell adhesion via plasma membrane adhesion molecules	Biological Process	1	Q14517
6	GO:1901606	alpha-amino acid catabolic process	Biological Process	2	Q09472, Q6QN92
6	GO:0045936	negative regulation of phosphate metabolic process	Biological Process	2	B2R841, A0A024R2W4
6	GO:1990778	protein localization to cell periphery	Biological Process	1	B4DYY3
6	GO:0001578	microtubule bundle formation	Biological Process	1	B2R841
6	GO:0007091	metaphase/anaphase transition of mitotic cell cycle	Biological Process	1	B2R841
6	GO:0034728	nucleosome organization	Biological Process	2	Q5TEC6, P17096
6	GO:0071174	mitotic spindle checkpoint	Biological Process	1	B2R841
6	GO:0001895	retina homeostasis	Biological Process	1	B4DYY3
6	GO:0070828	heterochromatin organization	Biological Process	1	P17096
6	GO:0061726	mitochondrion disassembly	Biological Process	1	A0A087X1T2
6	GO:0035058	nonmotile primary cilium assembly	Biological Process	1	B4DYY3
6	GO:1902806	regulation of cell cycle G1/S phase transition	Biological Process	2	Q09472, A5YRV2
6	GO:0006706	steroid catabolic process	Biological Process	1	B4DE48
6	GO:0006333	chromatin assembly or disassembly	Biological Process	2	Q5TEC6, P17096
6	GO:0032543	mitochondrial translation	Biological Process	2	P82914, Q6FHK1
6	GO:0006334	nucleosome assembly	Biological Process	1	Q5TEC6
6	GO:0010216	maintenance of DNA methylation	Biological Process	1	Q96T88
6	GO:0043537	negative regulation of blood vessel endothelial cell migration	Biological Process	1	Q5JR08
6	GO:0030855	epithelial cell differentiation	Biological Process	3	P08581, O15230, B1ALI9
6	GO:0006275	regulation of DNA replication	Biological Process	1	Q8N4P8
6	GO:0000086	G2/M transition of mitotic cell cycle	Biological Process	2	B2R841, O43805
6	GO:0033341	regulation of collagen binding	Biological Process	1	Q8N4P8
6	GO:0043241	protein complex disassembly	Biological Process	3	P82914, P17096, Q6FHK1
6	GO:0016266	O-glycan processing	Biological Process	1	A5YRV2
6	GO:0090002	establishment of protein localization to plasma membrane	Biological Process	1	B4DYY3
6	GO:0030182	neuron differentiation	Biological Process	3	Q5JR08, P08581, Q75MX0
6	GO:1902749	regulation of cell cycle G2/M phase transition	Biological Process	1	B2R841
6	GO:1901031	regulation of response to reactive oxygen species	Biological Process	1	P08581
6	GO:0010965	regulation of mitotic sister chromatid separation	Biological Process	1	B2R841
6	GO:0009163	nucleoside biosynthetic process	Biological Process	2	A0A097PY54, A0A140VJE0
6	GO:0007094	mitotic spindle assembly checkpoint	Biological Process	1	B2R841
6	GO:1901299	negative regulation of hydrogen peroxide-mediated programmed cell death	Biological Process	1	P08581
6	GO:0043122	regulation of I-kappaB kinase/NF-kappaB signaling	Biological Process	1	Q5JR08
6	GO:0006895	Golgi to endosome transport	Biological Process	1	A8KAQ3
6	GO:0071407	cellular response to organic cyclic compound	Biological Process	1	Q09472
6	GO:0032371	regulation of sterol transport	Biological Process	1	A0A087X1T2
6	GO:0042770	signal transduction in response to DNA damage	Biological Process	2	Q09472, A5YRV2
6	GO:0038027	apolipoprotein A-I-mediated signaling pathway	Biological Process	1	Q5JR08
6	GO:0052547	regulation of peptidase activity	Biological Process	1	B6CGU5
6	GO:0018344	protein geranylgeranylation	Biological Process	1	P53609
6	GO:0010912	positive regulation of isomerase activity	Biological Process	1	Q96T88
6	GO:0050684	regulation of mRNA processing	Biological Process	1	Q12872
6	GO:1903670	regulation of sprouting angiogenesis	Biological Process	1	Q5JR08
6	GO:0030518	intracellular steroid hormone receptor signaling pathway	Biological Process	1	Q09472
6	GO:0071363	cellular response to growth factor stimulus	Biological Process	2	Q5JR08, A8KAQ3
6	GO:0097193	intrinsic apoptotic signaling pathway	Biological Process	2	Q09472, A5YRV2
6	GO:1903206	negative regulation of hydrogen peroxide-induced cell death	Biological Process	1	P08581
6	GO:0090114	COPII-coated vesicle budding	Biological Process	1	B0AZV9
6	GO:0042278	purine nucleoside metabolic process	Biological Process	5	O75438, A0A097PY54, O43678, A0A140VJE0, P07311
6	GO:0035385	Roundabout signaling pathway	Biological Process	1	Q5JR08
6	GO:0006897	endocytosis	Biological Process	4	Q9H5M4, B4DT46, P52735, A8KAQ3
6	GO:0032200	telomere organization	Biological Process	2	Q5TEC6, Q9BVP2
6	GO:1903205	regulation of hydrogen peroxide-induced cell death	Biological Process	1	P08581
6	GO:0060538	skeletal muscle organ development	Biological Process	1	F8VZJ2
6	GO:0022008	neurogenesis	Biological Process	4	Q5JR08, P08581, Q75MX0, F1JVV5
6	GO:0006743	ubiquinone metabolic process	Biological Process	1	O75438
6	GO:1902680	positive regulation of RNA biosynthetic process	Biological Process	10	Q09472, C9JCN8, Q96T88, P08581, Q9BVP2, A0A087X1T2, A5YRV2, P17096, Q9Y6H1, F1JVV5
6	GO:0009117	nucleotide metabolic process	Biological Process	4	O75438, A0A097PY54, O43678, P07311
6	GO:2001141	regulation of RNA biosynthetic process	Biological Process	13	Q5TEC6, Q09472, C9JCN8, Q9BVP2, A0A087X1T2, Q9Y6H1, F8VZJ2, Q96T88, P08581, B2R841, A5YRV2, P17096, F1JVV5
6	GO:0042475	odontogenesis of dentin-containing tooth	Biological Process	1	A0A024R8K7
6	GO:0006901	vesicle coating	Biological Process	1	B0AZV9
6	GO:0006626	protein targeting to mitochondrion	Biological Process	2	B2R4N3, A0A087X1T2
6	GO:0072367	regulation of lipid transport by regulation of transcription from RNA polymerase II promoter	Biological Process	1	A0A087X1T2
6	GO:0043043	peptide biosynthetic process	Biological Process	16	P82914, Q6DKI1, A0A024RDF4, J3QR09, P62081, B3KS36, F8VZJ2, Q6IAM0, P62861, P63173, H0UI22, P62273, P83881, P62857, P62269, Q6FHK1
6	GO:0048017	inositol lipid-mediated signaling	Biological Process	1	Q5JR08
6	GO:0032986	protein-DNA complex disassembly	Biological Process	1	P17096
6	GO:0045892	negative regulation of transcription, DNA-templated	Biological Process	7	Q09472, Q5TEC6, Q96T88, B2R841, A0A087X1T2, A5YRV2, P17096
6	GO:0046164	alcohol catabolic process	Biological Process	1	B4DE48
6	GO:0009124	nucleoside monophosphate biosynthetic process	Biological Process	2	A0A097PY54, A0A140VJE0
6	GO:0033047	regulation of mitotic sister chromatid segregation	Biological Process	1	B2R841
6	GO:0033044	regulation of chromosome organization	Biological Process	2	B2R841, Q9BVP2
6	GO:0098732	macromolecule deacylation	Biological Process	1	Q09472
6	GO:1901796	regulation of signal transduction by p53 class mediator	Biological Process	2	Q09472, A5YRV2
6	GO:0046394	carboxylic acid biosynthetic process	Biological Process	2	O00767, B4DE67
6	GO:0061154	endothelial tube morphogenesis	Biological Process	1	Q5JR08
6	GO:0042552	myelination	Biological Process	1	A0A0A0MTB0
6	GO:0075733	intracellular transport of virus	Biological Process	1	A8K7D9
6	GO:0006414	translational elongation	Biological Process	2	P82914, Q6FHK1
6	GO:0031401	positive regulation of protein modification process	Biological Process	6	Q5JR08, P08581, B2R841, Q9BVP2, B2R4U3, A5YRV2
6	GO:0043623	cellular protein complex assembly	Biological Process	4	O75438, B2R4U3, B4DT46, O43678
6	GO:0010608	posttranscriptional regulation of gene expression	Biological Process	2	Q6IAM0, A0A024RDF4
6	GO:0009165	nucleotide biosynthetic process	Biological Process	1	A0A097PY54
6	GO:0006376	mRNA splice site selection	Biological Process	1	Q12872
6	GO:0002220	innate immune response activating cell surface receptor signaling pathway	Biological Process	1	Q09472
6	GO:1902229	regulation of intrinsic apoptotic signaling pathway in response to DNA damage	Biological Process	1	A5YRV2
6	GO:0044773	mitotic DNA damage checkpoint	Biological Process	2	Q09472, A5YRV2
6	GO:2001242	regulation of intrinsic apoptotic signaling pathway	Biological Process	1	A5YRV2
6	GO:0009142	nucleoside triphosphate biosynthetic process	Biological Process	1	A0A097PY54
6	GO:0030216	keratinocyte differentiation	Biological Process	1	B1ALI9
6	GO:0048625	myoblast fate commitment	Biological Process	1	O00458
6	GO:2000816	negative regulation of mitotic sister chromatid separation	Biological Process	1	B2R841
6	GO:0048841	regulation of axon extension involved in axon guidance	Biological Process	1	Q75MX0
6	GO:0043618	regulation of transcription from RNA polymerase II promoter in response to stress	Biological Process	2	Q09472, A5YRV2
6	GO:1990542	mitochondrial transmembrane transport	Biological Process	1	A0A097PY54
6	GO:0031058	positive regulation of histone modification	Biological Process	1	A5YRV2
6	GO:0008206	bile acid metabolic process	Biological Process	1	B4DE67
6	GO:0007518	myoblast fate determination	Biological Process	1	O00458
6	GO:0046782	regulation of viral transcription	Biological Process	1	Q09472
6	GO:1902652	secondary alcohol metabolic process	Biological Process	2	B3KRC6, B4DE48
6	GO:0051898	negative regulation of protein kinase B signaling	Biological Process	1	A0A024R2W4
6	GO:0043123	positive regulation of I-kappaB kinase/NF-kappaB signaling	Biological Process	1	Q5JR08
6	GO:0042776	mitochondrial ATP synthesis coupled proton transport	Biological Process	1	A0A097PY54
6	GO:0010976	positive regulation of neuron projection development	Biological Process	1	Q5JR08
6	GO:0034622	cellular macromolecular complex assembly	Biological Process	8	Q5TEC6, O75438, Q12872, P63173, B2R4U3, B4DT46, O43678, H3BMQ2
6	GO:0016055	Wnt signaling pathway	Biological Process	2	Q9H5M4, Q5JR08
6	GO:0045666	positive regulation of neuron differentiation	Biological Process	1	Q5JR08
6	GO:0030038	contractile actin filament bundle assembly	Biological Process	1	Q5JR08
6	GO:0060271	cilium morphogenesis	Biological Process	2	Q9H5M4, B4DYY3
6	GO:0043039	tRNA aminoacylation	Biological Process	1	H0UI22
6	GO:2001251	negative regulation of chromosome organization	Biological Process	1	B2R841
6	GO:0006633	fatty acid biosynthetic process	Biological Process	1	O00767
6	GO:0006401	RNA catabolic process	Biological Process	8	P62861, P63173, P62273, P83881, J3QR09, P62081, P62857, P62269
6	GO:0030162	regulation of proteolysis	Biological Process	4	B6CGU5, B2R841, P08582, B2R4U3
6	GO:0009123	nucleoside monophosphate metabolic process	Biological Process	5	O75438, A0A097PY54, A0A140VJE0, O43678, P07311
6	GO:0006163	purine nucleotide metabolic process	Biological Process	4	O75438, A0A097PY54, O43678, P07311
6	GO:0043462	regulation of ATPase activity	Biological Process	1	Q96T88
6	GO:0000082	G1/S transition of mitotic cell cycle	Biological Process	2	Q09472, A5YRV2
6	GO:0051785	positive regulation of nuclear division	Biological Process	1	B2R4U3
6	GO:0016310	phosphorylation	Biological Process	9	Q9H5M4, Q5JR08, O75438, P08581, Q8N4P8, B2R841, A0A024R2W4, O43678, P07311
6	GO:0050691	regulation of defense response to virus by host	Biological Process	1	Q5TEC6
6	GO:0033108	mitochondrial respiratory chain complex assembly	Biological Process	2	O75438, O43678
6	GO:0034220	ion transmembrane transport	Biological Process	1	A0A097PY54
6	GO:0007219	Notch signaling pathway	Biological Process	1	Q09472
6	GO:0010631	epithelial cell migration	Biological Process	3	Q5JR08, P08581, B5BU78
6	GO:0000245	spliceosomal complex assembly	Biological Process	1	Q12872
6	GO:0007179	transforming growth factor beta receptor signaling pathway	Biological Process	1	Q5JR08
6	GO:0032680	regulation of tumor necrosis factor production	Biological Process	1	B4DT46
6	GO:0006464	cellular protein modification process	Biological Process	14	Q9H5M4, Q09472, Q8N4P8, Q9BVP2, Q5JXX1, B5BU78, Q5JR08, Q96T88, P08581, B2R841, B2R4U3, A5YRV2, P53609, A0A024R2W4
6	GO:0050772	positive regulation of axonogenesis	Biological Process	1	Q5JR08
6	GO:0009064	glutamine family amino acid metabolic process	Biological Process	1	H0UI22
6	GO:0006977	DNA damage response, signal transduction by p53 class mediator resulting in cell cycle arrest	Biological Process	2	Q09472, A5YRV2
6	GO:0048333	mesodermal cell differentiation	Biological Process	1	A0A024R8K7
6	GO:0006364	rRNA processing	Biological Process	17	O95478, Q13895, Q6DKI1, J3QR09, P62081, Q8IY37, Q9H9Y2, B2R823, Q9BVJ6, P62861, P63173, P62273, P83881, P62857, P62269, A8K201, Q96GA3
6	GO:0006281	DNA repair	Biological Process	4	Q5TEC6, Q09472, B2R4U3, P17096
6	GO:0006612	protein targeting to membrane	Biological Process	8	P62861, P63173, P62273, P83881, J3QR09, P62081, P62857, P62269
6	GO:0051081	nuclear envelope disassembly	Biological Process	1	B2R841
6	GO:0006694	steroid biosynthetic process	Biological Process	2	B4DE67, B3KRC6
6	GO:0034614	cellular response to reactive oxygen species	Biological Process	2	Q5JR08, P08581
6	GO:0007218	neuropeptide signaling pathway	Biological Process	1	A8KAQ3
6	GO:0031032	actomyosin structure organization	Biological Process	1	Q5JR08
6	GO:0033619	membrane protein proteolysis	Biological Process	1	A0A024R2W4
6	GO:0045815	positive regulation of gene expression, epigenetic	Biological Process	3	Q5TEC6, Q09472, P17096
6	GO:0002431	Fc receptor mediated stimulatory signaling pathway	Biological Process	1	P52735
6	GO:0016311	dephosphorylation	Biological Process	1	B5BU78
6	GO:1903317	regulation of protein maturation	Biological Process	1	P08582
6	GO:0044819	mitotic G1/S transition checkpoint	Biological Process	2	Q09472, A5YRV2
6	GO:0007096	regulation of exit from mitosis	Biological Process	1	B2R4U3
6	GO:0032868	response to insulin	Biological Process	1	A8KAQ3
6	GO:0097191	extrinsic apoptotic signaling pathway	Biological Process	2	B6CGU5, A8KAQ3
6	GO:0071479	cellular response to ionizing radiation	Biological Process	1	Q5JR08
6	GO:0009069	serine family amino acid metabolic process	Biological Process	3	Q9H5M4, B2R841, Q6QN92
6	GO:0006733	oxidoreduction coenzyme metabolic process	Biological Process	2	O75438, P07311
6	GO:0043604	amide biosynthetic process	Biological Process	16	P82914, Q6DKI1, A0A024RDF4, J3QR09, P62081, B3KS36, F8VZJ2, Q6IAM0, P62861, P63173, H0UI22, P62273, P83881, P62857, P62269, Q6FHK1
6	GO:0006812	cation transport	Biological Process	4	O75438, Q6PJ25, P08582, A0A097PY54
6	GO:0010977	negative regulation of neuron projection development	Biological Process	2	Q5JR08, Q75MX0
6	GO:0071616	acyl-CoA biosynthetic process	Biological Process	1	O00767
6	GO:0045814	negative regulation of gene expression, epigenetic	Biological Process	2	Q5TEC6, P17096
6	GO:0006096	glycolytic process	Biological Process	1	P07311
6	GO:1903319	positive regulation of protein maturation	Biological Process	1	P08582
6	GO:0016127	sterol catabolic process	Biological Process	1	B4DE48
6	GO:0000077	DNA damage checkpoint	Biological Process	3	Q09472, B2R841, A5YRV2
6	GO:0009259	ribonucleotide metabolic process	Biological Process	4	O75438, A0A097PY54, O43678, P07311
6	GO:0006546	glycine catabolic process	Biological Process	1	Q6QN92
6	GO:0090091	positive regulation of extracellular matrix disassembly	Biological Process	1	P08582
6	GO:0048762	mesenchymal cell differentiation	Biological Process	2	A0A024R2W4, Q75MX0
6	GO:1903825	organic acid transmembrane transport	Biological Process	1	Q9HBR0
6	GO:0019318	hexose metabolic process	Biological Process	1	P07311
6	GO:0090307	mitotic spindle assembly	Biological Process	2	Q5JR08, B2R841
6	GO:0043632	modification-dependent macromolecule catabolic process	Biological Process	3	Q96T88, B2R841, B2R4U3
6	GO:0002042	cell migration involved in sprouting angiogenesis	Biological Process	1	Q5JR08
6	GO:0008156	negative regulation of DNA replication	Biological Process	1	Q8N4P8
6	GO:0031400	negative regulation of protein modification process	Biological Process	4	Q8N4P8, B2R841, B2R4U3, A0A024R2W4
6	GO:0061041	regulation of wound healing	Biological Process	1	P52735
6	GO:0003382	epithelial cell morphogenesis	Biological Process	1	P08581
6	GO:0014032	neural crest cell development	Biological Process	1	Q75MX0
6	GO:0043066	negative regulation of apoptotic process	Biological Process	2	B2R841, A5YRV2
6	GO:0071383	cellular response to steroid hormone stimulus	Biological Process	1	Q09472
6	GO:0001885	endothelial cell development	Biological Process	1	P08581
6	GO:0016197	endosomal transport	Biological Process	3	Q5JR08, B4DE48, A8KAQ3
6	GO:0048227	plasma membrane to endosome transport	Biological Process	1	A8KAQ3
6	GO:0045665	negative regulation of neuron differentiation	Biological Process	2	Q5JR08, Q75MX0
6	GO:0009101	glycoprotein biosynthetic process	Biological Process	2	A5YRV2, A0A024R2W4
6	GO:0009913	epidermal cell differentiation	Biological Process	1	B1ALI9
6	GO:0009132	nucleoside diphosphate metabolic process	Biological Process	1	P07311
6	GO:0010822	positive regulation of mitochondrion organization	Biological Process	2	B2R4N3, A0A087X1T2
6	GO:0051495	positive regulation of cytoskeleton organization	Biological Process	1	Q5JR08
6	GO:0032760	positive regulation of tumor necrosis factor production	Biological Process	1	B4DT46
6	GO:0043484	regulation of RNA splicing	Biological Process	1	Q12872
6	GO:2000371	regulation of DNA topoisomerase (ATP-hydrolyzing) activity	Biological Process	1	Q96T88
6	GO:0065004	protein-DNA complex assembly	Biological Process	1	Q5TEC6
6	GO:0043087	regulation of GTPase activity	Biological Process	1	P52735
6	GO:0007041	lysosomal transport	Biological Process	2	Q5JR08, A8KAQ3
6	GO:0007044	cell-substrate junction assembly	Biological Process	2	A0A024R8K7, O15230
6	GO:0010715	regulation of extracellular matrix disassembly	Biological Process	1	P08582
6	GO:0000723	telomere maintenance	Biological Process	2	Q5TEC6, Q9BVP2
6	GO:0008630	intrinsic apoptotic signaling pathway in response to DNA damage	Biological Process	2	Q09472, A5YRV2
6	GO:0015917	aminophospholipid transport	Biological Process	1	Q6PJ25
6	GO:0031056	regulation of histone modification	Biological Process	1	A5YRV2
6	GO:0051146	striated muscle cell differentiation	Biological Process	1	A8KAQ3
6	GO:0051784	negative regulation of nuclear division	Biological Process	1	B2R841
6	GO:0010975	regulation of neuron projection development	Biological Process	2	Q5JR08, Q75MX0
6	GO:0033365	protein localization to organelle	Biological Process	16	Q9H5M4, A0A087X1T2, Q9BVP2, J3QR09, P62081, B2R4N3, P62861, P63173, B2R841, P62273, P83881, P62857, A0A024R2W4, A8K7D9, B4DYY3, P62269
6	GO:0032375	negative regulation of cholesterol transport	Biological Process	1	A0A087X1T2
6	GO:0033048	negative regulation of mitotic sister chromatid segregation	Biological Process	1	B2R841
6	GO:0006417	regulation of translation	Biological Process	2	Q6IAM0, A0A024RDF4
6	GO:0048863	stem cell differentiation	Biological Process	1	Q75MX0
6	GO:0072368	regulation of lipid transport by negative regulation of transcription from RNA polymerase II promoter	Biological Process	1	A0A087X1T2
6	GO:0043491	protein kinase B signaling	Biological Process	1	A0A024R2W4
6	GO:0048675	axon extension	Biological Process	1	Q75MX0
6	GO:1903362	regulation of cellular protein catabolic process	Biological Process	2	B2R841, B2R4U3
6	GO:0015918	sterol transport	Biological Process	1	A0A087X1T2
6	GO:0072431	signal transduction involved in mitotic G1 DNA damage checkpoint	Biological Process	2	Q09472, A5YRV2
6	GO:0010458	exit from mitosis	Biological Process	1	B2R4U3
6	GO:0060828	regulation of canonical Wnt signaling pathway	Biological Process	1	Q9H5M4
6	GO:0038179	neurotrophin signaling pathway	Biological Process	1	A8KAQ3
6	GO:0061418	regulation of transcription from RNA polymerase II promoter in response to hypoxia	Biological Process	1	Q09472
6	GO:0051493	regulation of cytoskeleton organization	Biological Process	2	Q5JR08, B2R841
6	GO:0090402	oncogene-induced cell senescence	Biological Process	1	P17096
6	GO:0042590	antigen processing and presentation of exogenous peptide antigen via MHC class I	Biological Process	1	B4DT46
6	GO:0099024	plasma membrane invagination	Biological Process	1	Q5JR08
6	GO:0003159	morphogenesis of an endothelium	Biological Process	1	Q5JR08
6	GO:0007229	integrin-mediated signaling pathway	Biological Process	2	A0A024R8K7, O15230
6	GO:0072401	signal transduction involved in DNA integrity checkpoint	Biological Process	2	Q09472, A5YRV2
6	GO:0044257	cellular protein catabolic process	Biological Process	3	Q96T88, B2R841, B2R4U3
6	GO:0072522	purine-containing compound biosynthetic process	Biological Process	2	A0A097PY54, A0A140VJE0
6	GO:0007264	small GTPase mediated signal transduction	Biological Process	3	Q52LW3, Q5JR08, P52735
6	GO:0042967	acyl-carrier-protein biosynthetic process	Biological Process	2	Q09472, Q92604
6	GO:1901298	regulation of hydrogen peroxide-mediated programmed cell death	Biological Process	1	P08581
6	GO:0051436	negative regulation of ubiquitin-protein ligase activity involved in mitotic cell cycle	Biological Process	1	B2R4U3
6	GO:0042891	antibiotic transport	Biological Process	1	D6RIZ4
6	GO:0046395	carboxylic acid catabolic process	Biological Process	2	Q09472, Q6QN92
6	GO:0048812	neuron projection morphogenesis	Biological Process	2	Q5JR08, Q75MX0
6	GO:0070301	cellular response to hydrogen peroxide	Biological Process	2	Q5JR08, P08581
6	GO:0045937	positive regulation of phosphate metabolic process	Biological Process	3	Q5JR08, P08581, B2R841
6	GO:0015931	nucleobase-containing compound transport	Biological Process	1	A0A024RDF4
6	GO:0046390	ribose phosphate biosynthetic process	Biological Process	1	A0A097PY54
6	GO:0045862	positive regulation of proteolysis	Biological Process	4	B6CGU5, B2R841, P08582, B2R4U3
6	GO:0000280	nuclear division	Biological Process	4	Q5JR08, B2R841, B2R4U3, D3DR37
6	GO:0050434	positive regulation of viral transcription	Biological Process	1	Q09472
6	GO:0040029	regulation of gene expression, epigenetic	Biological Process	3	Q5TEC6, Q09472, P17096
6	GO:0010821	regulation of mitochondrion organization	Biological Process	2	B2R4N3, A0A087X1T2
6	GO:0051297	centrosome organization	Biological Process	1	B2R841
6	GO:0071396	cellular response to lipid	Biological Process	1	Q09472
6	GO:0071103	DNA conformation change	Biological Process	2	Q5TEC6, P17096
6	GO:0015749	monosaccharide transport	Biological Process	1	A8KAQ3
6	GO:1903673	mitotic cleavage furrow formation	Biological Process	1	Q5JR08
6	GO:0006396	RNA processing	Biological Process	21	O95478, Q13895, Q12872, Q6DKI1, A0A024RDF4, J3QR09, Q5VV42, P62081, Q8IY37, Q9NY93, Q9H9Y2, B2R823, Q9BVJ6, P62861, P63173, P62273, P83881, P62857, P62269, A8K201, Q96GA3
6	GO:0051345	positive regulation of hydrolase activity	Biological Process	2	Q5JR08, Q96T88
6	GO:0051346	negative regulation of hydrolase activity	Biological Process	1	A8KAQ3
6	GO:1904837	beta-catenin-TCF complex assembly	Biological Process	1	Q09472
6	GO:0048208	COPII vesicle coating	Biological Process	1	B0AZV9
6	GO:0043174	nucleoside salvage	Biological Process	1	A0A140VJE0
6	GO:0090175	regulation of establishment of planar polarity	Biological Process	1	Q5JR08
6	GO:0048193	Golgi vesicle transport	Biological Process	3	B0AZV9, A6NLH6, A8KAQ3
6	GO:0051603	proteolysis involved in cellular protein catabolic process	Biological Process	3	Q96T88, B2R841, B2R4U3
6	GO:0051348	negative regulation of transferase activity	Biological Process	2	B2R841, B2R4U3
6	GO:0007411	axon guidance	Biological Process	1	Q75MX0
6	GO:0009066	aspartate family amino acid metabolic process	Biological Process	2	Q09472, Q6QN92
6	GO:0034660	ncRNA metabolic process	Biological Process	19	O95478, Q13895, Q6DKI1, J3QR09, P62081, Q5VV42, Q8IY37, Q9H9Y2, B2R823, Q9BVJ6, P62861, P63173, H0UI22, P62273, P83881, P62857, P62269, A8K201, Q96GA3
6	GO:0060765	regulation of androgen receptor signaling pathway	Biological Process	1	Q09472
6	GO:0007167	enzyme linked receptor protein signaling pathway	Biological Process	5	Q5JR08, P08581, B4DT46, P52735, A8KAQ3
6	GO:0051438	regulation of ubiquitin-protein transferase activity	Biological Process	2	B2R841, B2R4U3
6	GO:1904814	regulation of protein localization to chromosome, telomeric region	Biological Process	1	Q9BVP2
6	GO:0016071	mRNA metabolic process	Biological Process	9	P62861, Q12872, P63173, P62273, P83881, J3QR09, P62081, P62857, P62269
6	GO:0007249	I-kappaB kinase/NF-kappaB signaling	Biological Process	1	Q5JR08
6	GO:0031497	chromatin assembly	Biological Process	2	Q5TEC6, P17096
6	GO:0050953	sensory perception of light stimulus	Biological Process	1	O75911
6	GO:0097468	programmed cell death in response to reactive oxygen species	Biological Process	1	P08581
6	GO:0019752	carboxylic acid metabolic process	Biological Process	7	O00767, Q09472, H0UI22, B4DE67, B3KRC6, Q6QN92, P07311
6	GO:0044774	mitotic DNA integrity checkpoint	Biological Process	2	Q09472, A5YRV2
6	GO:0006310	DNA recombination	Biological Process	1	A8K7D9
6	GO:0036294	cellular response to decreased oxygen levels	Biological Process	2	Q09472, Q9Y6H1
6	GO:0006338	chromatin remodeling	Biological Process	1	P17096
6	GO:0000079	regulation of cyclin-dependent protein serine/threonine kinase activity	Biological Process	2	Q8N4P8, B2R841
6	GO:0044744	protein targeting to nucleus	Biological Process	2	A0A024R2W4, A8K7D9
6	GO:0072655	establishment of protein localization to mitochondrion	Biological Process	2	B2R4N3, A0A087X1T2
6	GO:0006605	protein targeting	Biological Process	12	A0A087X1T2, J3QR09, P62081, B2R4N3, P62861, P63173, P62273, P83881, P62857, A0A024R2W4, A8K7D9, P62269
6	GO:0072659	protein localization to plasma membrane	Biological Process	1	B4DYY3
6	GO:0009411	response to UV	Biological Process	1	Q09472
6	GO:0006144	purine nucleobase metabolic process	Biological Process	1	A0A140VJE0
6	GO:0031498	chromatin disassembly	Biological Process	1	P17096
6	GO:0051896	regulation of protein kinase B signaling	Biological Process	1	A0A024R2W4
6	GO:0046165	alcohol biosynthetic process	Biological Process	1	B3KRC6
6	GO:0000018	regulation of DNA recombination	Biological Process	1	A8K7D9
6	GO:1900180	regulation of protein localization to nucleus	Biological Process	1	B2R841
6	GO:0019362	pyridine nucleotide metabolic process	Biological Process	1	P07311
6	GO:0034308	primary alcohol metabolic process	Biological Process	1	O75911
6	GO:0010498	proteasomal protein catabolic process	Biological Process	2	B2R841, B2R4U3
6	GO:0042773	ATP synthesis coupled electron transport	Biological Process	2	O75438, O43678
6	GO:0006570	tyrosine metabolic process	Biological Process	1	B5BU78
6	GO:0008203	cholesterol metabolic process	Biological Process	2	B3KRC6, B4DE48
6	GO:0075713	establishment of integrated proviral latency	Biological Process	1	P17096
6	GO:0048641	regulation of skeletal muscle tissue development	Biological Process	1	F8VZJ2
6	GO:0006721	terpenoid metabolic process	Biological Process	1	O75911
6	GO:0015914	phospholipid transport	Biological Process	1	Q6PJ25
6	GO:1901992	positive regulation of mitotic cell cycle phase transition	Biological Process	1	B2R4U3
6	GO:0043101	purine-containing compound salvage	Biological Process	1	A0A140VJE0
6	GO:0050767	regulation of neurogenesis	Biological Process	2	Q5JR08, Q75MX0
6	GO:0015711	organic anion transport	Biological Process	3	A0A0A0MTB0, D6RIZ4, Q9HBR0
6	GO:1902099	regulation of metaphase/anaphase transition of cell cycle	Biological Process	1	B2R841
6	GO:0046364	monosaccharide biosynthetic process	Biological Process	1	P07311
6	GO:0006120	mitochondrial electron transport, NADH to ubiquinone	Biological Process	2	O75438, O43678
6	GO:0061564	axon development	Biological Process	2	Q5JR08, Q75MX0
6	GO:0052472	modulation by host of symbiont transcription	Biological Process	1	Q09472
6	GO:0072413	signal transduction involved in mitotic cell cycle checkpoint	Biological Process	2	Q09472, A5YRV2
6	GO:0035767	endothelial cell chemotaxis	Biological Process	1	P08581
6	GO:0051347	positive regulation of transferase activity	Biological Process	3	Q5JR08, B2R841, B2R4U3
6	GO:0000183	chromatin silencing at rDNA	Biological Process	1	Q5TEC6
6	GO:0043065	positive regulation of apoptotic process	Biological Process	3	B6CGU5, Q5JR08, P52735
6	GO:1902807	negative regulation of cell cycle G1/S phase transition	Biological Process	2	Q09472, A5YRV2
6	GO:1903747	regulation of establishment of protein localization to mitochondrion	Biological Process	2	B2R4N3, A0A087X1T2
6	GO:0019220	regulation of phosphate metabolic process	Biological Process	5	Q5JR08, P08581, Q8N4P8, B2R841, A0A024R2W4
6	GO:0072599	establishment of protein localization to endoplasmic reticulum	Biological Process	8	P62861, P63173, P62273, P83881, J3QR09, P62081, P62857, P62269
6	GO:1903311	regulation of mRNA metabolic process	Biological Process	1	Q12872
6	GO:0048667	cell morphogenesis involved in neuron differentiation	Biological Process	2	Q5JR08, Q75MX0
6	GO:1904030	negative regulation of cyclin-dependent protein kinase activity	Biological Process	1	B2R841
6	GO:0006412	translation	Biological Process	16	P82914, Q6DKI1, A0A024RDF4, J3QR09, P62081, B3KS36, F8VZJ2, Q6IAM0, P62861, P63173, H0UI22, P62273, P83881, P62857, P62269, Q6FHK1
6	GO:0051056	regulation of small GTPase mediated signal transduction	Biological Process	3	Q52LW3, Q5JR08, P52735
6	GO:0060191	regulation of lipase activity	Biological Process	2	Q5JR08, A8KAQ3
6	GO:0043535	regulation of blood vessel endothelial cell migration	Biological Process	1	Q5JR08
6	GO:0033157	regulation of intracellular protein transport	Biological Process	3	B2R4N3, Q5JR08, A0A087X1T2
6	GO:1902679	negative regulation of RNA biosynthetic process	Biological Process	7	Q09472, Q5TEC6, Q96T88, B2R841, A0A087X1T2, A5YRV2, P17096
6	GO:1901663	quinone biosynthetic process	Biological Process	1	O75438
6	GO:0016126	sterol biosynthetic process	Biological Process	1	B3KRC6
6	GO:0002768	immune response-regulating cell surface receptor signaling pathway	Biological Process	2	Q09472, P52735
6	GO:0006913	nucleocytoplasmic transport	Biological Process	2	A0A024R2W4, A8K7D9
6	GO:1901797	negative regulation of signal transduction by p53 class mediator	Biological Process	1	A5YRV2
6	GO:0035337	fatty-acyl-CoA metabolic process	Biological Process	1	O00767
6	GO:0015992	proton transport	Biological Process	2	O75438, A0A097PY54
6	GO:0050771	negative regulation of axonogenesis	Biological Process	2	Q5JR08, Q75MX0
6	GO:1902166	negative regulation of intrinsic apoptotic signaling pathway in response to DNA damage by p53 class mediator	Biological Process	1	A5YRV2
6	GO:0032640	tumor necrosis factor production	Biological Process	1	B4DT46
6	GO:0015904	tetracycline transport	Biological Process	1	D6RIZ4
6	GO:2000113	negative regulation of cellular macromolecule biosynthetic process	Biological Process	8	Q09472, Q5TEC6, Q96T88, Q8N4P8, B2R841, A0A087X1T2, A5YRV2, P17096
6	GO:0009141	nucleoside triphosphate metabolic process	Biological Process	4	O75438, A0A097PY54, O43678, P07311
6	GO:0042981	regulation of apoptotic process	Biological Process	7	B6CGU5, Q5JR08, Q09472, B2R841, A5YRV2, P52735, F6TR53
6	GO:0006865	amino acid transport	Biological Process	1	Q9HBR0
6	GO:0045893	positive regulation of transcription, DNA-templated	Biological Process	10	Q09472, Q96T88, C9JCN8, P08581, Q9BVP2, A0A087X1T2, A5YRV2, P17096, Q9Y6H1, F1JVV5
6	GO:0006351	transcription, DNA-templated	Biological Process	13	Q09472, Q5TEC6, C9JCN8, A0A087X1T2, Q9BVP2, Q9Y6H1, F8VZJ2, Q96T88, P08581, B2R841, A5YRV2, P17096, F1JVV5
6	GO:2001252	positive regulation of chromosome organization	Biological Process	1	Q9BVP2
6	GO:0001738	morphogenesis of a polarized epithelium	Biological Process	1	Q5JR08
6	GO:1902284	neuron projection extension involved in neuron projection guidance	Biological Process	1	Q75MX0
6	GO:0031399	regulation of protein modification process	Biological Process	9	Q09472, Q5JR08, Q8N4P8, P08581, B2R841, Q9BVP2, B2R4U3, A5YRV2, A0A024R2W4
6	GO:1901673	regulation of mitotic spindle assembly	Biological Process	1	B2R841
6	GO:0070831	basement membrane assembly	Biological Process	1	A0A024R2W4
6	GO:0071711	basement membrane organization	Biological Process	1	A0A024R2W4
6	GO:0042554	superoxide anion generation	Biological Process	1	B4DT46
6	GO:0031536	positive regulation of exit from mitosis	Biological Process	1	B2R4U3
6	GO:1903364	positive regulation of cellular protein catabolic process	Biological Process	2	B2R841, B2R4U3
6	GO:0032460	negative regulation of protein oligomerization	Biological Process	1	Q5TEC6
6	GO:0036474	cell death in response to hydrogen peroxide	Biological Process	1	P08581
6	GO:0016569	chromatin modification	Biological Process	4	Q09472, Q96T88, A5YRV2, Q5JXX1
6	GO:0034453	microtubule anchoring	Biological Process	1	A0A024R2W4
6	GO:0045445	myoblast differentiation	Biological Process	1	O00458
6	GO:0071482	cellular response to light stimulus	Biological Process	1	Q09472
6	GO:0032981	mitochondrial respiratory chain complex I assembly	Biological Process	2	O75438, O43678
6	GO:0043408	regulation of MAPK cascade	Biological Process	2	P08581, A0A024R2W4
6	GO:0009108	coenzyme biosynthetic process	Biological Process	2	O00767, O75438
6	GO:1902100	negative regulation of metaphase/anaphase transition of cell cycle	Biological Process	1	B2R841
6	GO:0006260	DNA replication	Biological Process	1	Q8N4P8
6	GO:0050830	defense response to Gram-positive bacterium	Biological Process	1	P62861
6	GO:2000112	regulation of cellular macromolecule biosynthetic process	Biological Process	16	Q5TEC6, Q09472, C9JCN8, Q8N4P8, Q9BVP2, A0A087X1T2, A0A024RDF4, Q9Y6H1, F8VZJ2, Q96T88, Q6IAM0, P08581, B2R841, A5YRV2, P17096, F1JVV5
6	GO:0003158	endothelium development	Biological Process	2	Q5JR08, P08581
6	GO:0031532	actin cytoskeleton reorganization	Biological Process	1	Q5JR08
6	GO:0048207	vesicle targeting, rough ER to cis-Golgi	Biological Process	1	B0AZV9
6	GO:1901991	negative regulation of mitotic cell cycle phase transition	Biological Process	3	Q09472, B2R841, A5YRV2
6	GO:0009451	RNA modification	Biological Process	1	Q5VV42
6	GO:0014706	striated muscle tissue development	Biological Process	1	F8VZJ2
6	GO:0009119	ribonucleoside metabolic process	Biological Process	5	O75438, A0A097PY54, O43678, A0A140VJE0, P07311
6	GO:1903671	negative regulation of sprouting angiogenesis	Biological Process	1	Q5JR08
6	GO:0033559	unsaturated fatty acid metabolic process	Biological Process	1	O00767
6	GO:0045727	positive regulation of translation	Biological Process	1	A0A024RDF4
6	GO:0071526	semaphorin-plexin signaling pathway	Biological Process	2	P08581, Q75MX0
6	GO:1901990	regulation of mitotic cell cycle phase transition	Biological Process	4	Q09472, B2R841, B2R4U3, A5YRV2
7	GO:0006400	tRNA modification	Biological Process	1	Q5VV42
7	GO:0016101	diterpenoid metabolic process	Biological Process	1	O75911
7	GO:0030330	DNA damage response, signal transduction by p53 class mediator	Biological Process	2	Q09472, A5YRV2
7	GO:0061136	regulation of proteasomal protein catabolic process	Biological Process	1	B2R841
7	GO:0006166	purine ribonucleoside salvage	Biological Process	1	A0A140VJE0
7	GO:0001886	endothelial cell morphogenesis	Biological Process	1	P08581
7	GO:0019319	hexose biosynthetic process	Biological Process	1	P07311
7	GO:0009201	ribonucleoside triphosphate biosynthetic process	Biological Process	1	A0A097PY54
7	GO:0060192	negative regulation of lipase activity	Biological Process	1	A8KAQ3
7	GO:1903214	regulation of protein targeting to mitochondrion	Biological Process	2	B2R4N3, A0A087X1T2
7	GO:0006613	cotranslational protein targeting to membrane	Biological Process	8	P62861, P63173, P62273, P83881, J3QR09, P62081, P62857, P62269
7	GO:0008645	hexose transport	Biological Process	1	A8KAQ3
7	GO:0009156	ribonucleoside monophosphate biosynthetic process	Biological Process	2	A0A097PY54, A0A140VJE0
7	GO:0046939	nucleotide phosphorylation	Biological Process	1	P07311
7	GO:0009161	ribonucleoside monophosphate metabolic process	Biological Process	5	O75438, A0A097PY54, A0A140VJE0, O43678, P07311
7	GO:0017004	cytochrome complex assembly	Biological Process	1	B4DT46
7	GO:0006892	post-Golgi vesicle-mediated transport	Biological Process	1	A8KAQ3
7	GO:0010944	negative regulation of transcription by competitive promoter binding	Biological Process	1	A5YRV2
7	GO:1902403	signal transduction involved in mitotic DNA integrity checkpoint	Biological Process	2	Q09472, A5YRV2
7	GO:0009144	purine nucleoside triphosphate metabolic process	Biological Process	4	O75438, A0A097PY54, O43678, P07311
7	GO:0006335	DNA replication-dependent nucleosome assembly	Biological Process	1	Q5TEC6
7	GO:0042455	ribonucleoside biosynthetic process	Biological Process	2	A0A097PY54, A0A140VJE0
7	GO:1903507	negative regulation of nucleic acid-templated transcription	Biological Process	7	Q09472, Q5TEC6, Q96T88, B2R841, A0A087X1T2, A5YRV2, P17096
7	GO:0009068	aspartate family amino acid catabolic process	Biological Process	1	Q09472
7	GO:0009145	purine nucleoside triphosphate biosynthetic process	Biological Process	1	A0A097PY54
7	GO:0043542	endothelial cell migration	Biological Process	3	Q5JR08, P08581, B5BU78
7	GO:0009150	purine ribonucleotide metabolic process	Biological Process	4	O75438, A0A097PY54, O43678, P07311
7	GO:0048699	generation of neurons	Biological Process	4	Q5JR08, P08581, Q75MX0, F1JVV5
7	GO:0046578	regulation of Ras protein signal transduction	Biological Process	1	P52735
7	GO:0042772	DNA damage response, signal transduction resulting in transcription	Biological Process	1	A5YRV2
7	GO:0051170	nuclear import	Biological Process	2	A0A024R2W4, A8K7D9
7	GO:0034644	cellular response to UV	Biological Process	1	Q09472
7	GO:0007169	transmembrane receptor protein tyrosine kinase signaling pathway	Biological Process	5	Q5JR08, P08581, B4DT46, P52735, A8KAQ3
7	GO:0033673	negative regulation of kinase activity	Biological Process	1	B2R841
7	GO:2000134	negative regulation of G1/S transition of mitotic cell cycle	Biological Process	2	Q09472, A5YRV2
7	GO:0006744	ubiquinone biosynthetic process	Biological Process	1	O75438
7	GO:1901985	positive regulation of protein acetylation	Biological Process	1	A5YRV2
7	GO:0006336	DNA replication-independent nucleosome assembly	Biological Process	1	Q5TEC6
7	GO:0061512	protein localization to cilium	Biological Process	1	B4DYY3
7	GO:1903050	regulation of proteolysis involved in cellular protein catabolic process	Biological Process	2	B2R841, B2R4U3
7	GO:0097659	nucleic acid-templated transcription	Biological Process	13	Q5TEC6, Q09472, C9JCN8, Q9BVP2, A0A087X1T2, Q9Y6H1, F8VZJ2, Q96T88, P08581, B2R841, A5YRV2, P17096, F1JVV5
7	GO:0000726	non-recombinational repair	Biological Process	1	Q5TEC6
7	GO:0001932	regulation of protein phosphorylation	Biological Process	5	Q5JR08, P08581, Q8N4P8, B2R841, A0A024R2W4
7	GO:0007265	Ras protein signal transduction	Biological Process	3	Q52LW3, Q5JR08, P52735
7	GO:0031365	N-terminal protein amino acid modification	Biological Process	1	Q09472
7	GO:0009199	ribonucleoside triphosphate metabolic process	Biological Process	4	O75438, A0A097PY54, O43678, P07311
7	GO:0048024	regulation of mRNA splicing, via spliceosome	Biological Process	1	Q12872
7	GO:0008625	extrinsic apoptotic signaling pathway via death domain receptors	Biological Process	1	A8KAQ3
7	GO:0097498	endothelial tube lumen extension	Biological Process	1	Q5JR08
7	GO:0006302	double-strand break repair	Biological Process	1	Q5TEC6
7	GO:0042326	negative regulation of phosphorylation	Biological Process	2	B2R841, A0A024R2W4
7	GO:1902653	secondary alcohol biosynthetic process	Biological Process	1	B3KRC6
7	GO:0035066	positive regulation of histone acetylation	Biological Process	1	A5YRV2
7	GO:0070647	protein modification by small protein conjugation or removal	Biological Process	5	Q96T88, Q8N4P8, B2R841, Q9BVP2, B2R4U3
7	GO:0034502	protein localization to chromosome	Biological Process	2	B2R841, Q9BVP2
7	GO:0018193	peptidyl-amino acid modification	Biological Process	6	Q9H5M4, Q09472, B2R841, Q9BVP2, A5YRV2, Q5JXX1
7	GO:0002479	antigen processing and presentation of exogenous peptide antigen via MHC class I, TAP-dependent	Biological Process	1	B4DT46
7	GO:0032787	monocarboxylic acid metabolic process	Biological Process	5	O00767, B4DE67, B3KRC6, Q6QN92, P07311
7	GO:0009071	serine family amino acid catabolic process	Biological Process	1	Q6QN92
7	GO:0003333	amino acid transmembrane transport	Biological Process	1	Q9HBR0
7	GO:0034470	ncRNA processing	Biological Process	18	O95478, Q13895, Q6DKI1, J3QR09, P62081, Q5VV42, Q8IY37, Q9H9Y2, B2R823, Q9BVJ6, P62861, P63173, P62273, P83881, P62857, P62269, A8K201, Q96GA3
7	GO:0098655	cation transmembrane transport	Biological Process	1	A0A097PY54
7	GO:0043149	stress fiber assembly	Biological Process	1	Q5JR08
7	GO:0007519	skeletal muscle tissue development	Biological Process	1	F8VZJ2
7	GO:0038093	Fc receptor signaling pathway	Biological Process	1	P52735
7	GO:0014902	myotube differentiation	Biological Process	1	A8KAQ3
7	GO:0034504	protein localization to nucleus	Biological Process	3	B2R841, A0A024R2W4, A8K7D9
7	GO:0035336	long-chain fatty-acyl-CoA metabolic process	Biological Process	1	O00767
7	GO:0010257	NADH dehydrogenase complex assembly	Biological Process	2	O75438, O43678
7	GO:0034724	DNA replication-independent nucleosome organization	Biological Process	1	Q5TEC6
7	GO:0002181	cytoplasmic translation	Biological Process	1	P83881
7	GO:0035601	protein deacylation	Biological Process	1	Q09472
7	GO:0045047	protein targeting to ER	Biological Process	8	P62861, P63173, P62273, P83881, J3QR09, P62081, P62857, P62269
7	GO:0001934	positive regulation of protein phosphorylation	Biological Process	3	Q5JR08, P08581, B2R841
7	GO:0016233	telomere capping	Biological Process	1	Q5TEC6
7	GO:0010421	hydrogen peroxide-mediated programmed cell death	Biological Process	1	P08581
7	GO:0090051	negative regulation of cell migration involved in sprouting angiogenesis	Biological Process	1	Q5JR08
7	GO:0045446	endothelial cell differentiation	Biological Process	1	P08581
7	GO:0044783	G1 DNA damage checkpoint	Biological Process	2	Q09472, A5YRV2
7	GO:0002230	positive regulation of defense response to virus by host	Biological Process	1	Q5TEC6
7	GO:0000122	negative regulation of transcription from RNA polymerase II promoter	Biological Process	4	Q09472, Q96T88, A0A087X1T2, B2R841
7	GO:0006415	translational termination	Biological Process	2	P82914, Q6FHK1
7	GO:0030301	cholesterol transport	Biological Process	1	A0A087X1T2
7	GO:0048011	neurotrophin TRK receptor signaling pathway	Biological Process	1	A8KAQ3
7	GO:0006397	mRNA processing	Biological Process	1	Q12872
7	GO:0002224	toll-like receptor signaling pathway	Biological Process	1	B4DT46
7	GO:0035065	regulation of histone acetylation	Biological Process	1	A5YRV2
7	GO:0060071	Wnt signaling pathway, planar cell polarity pathway	Biological Process	1	Q5JR08
7	GO:0001933	negative regulation of protein phosphorylation	Biological Process	2	B2R841, A0A024R2W4
7	GO:0031581	hemidesmosome assembly	Biological Process	1	A0A024R8K7
7	GO:0043543	protein acylation	Biological Process	3	Q09472, A5YRV2, Q5JXX1
7	GO:0030001	metal ion transport	Biological Process	2	O75438, P08582
7	GO:0042775	mitochondrial ATP synthesis coupled electron transport	Biological Process	2	O75438, O43678
7	GO:0046471	phosphatidylglycerol metabolic process	Biological Process	1	Q92604
7	GO:0009185	ribonucleoside diphosphate metabolic process	Biological Process	1	P07311
7	GO:0042325	regulation of phosphorylation	Biological Process	5	Q5JR08, P08581, Q8N4P8, B2R841, A0A024R2W4
7	GO:0006418	tRNA aminoacylation for protein translation	Biological Process	1	H0UI22
7	GO:0031572	G2 DNA damage checkpoint	Biological Process	1	B2R841
7	GO:0019464	glycine decarboxylation via glycine cleavage system	Biological Process	1	Q6QN92
7	GO:0006165	nucleoside diphosphate phosphorylation	Biological Process	1	P07311
7	GO:0072332	intrinsic apoptotic signaling pathway by p53 class mediator	Biological Process	2	Q09472, A5YRV2
7	GO:0050770	regulation of axonogenesis	Biological Process	2	Q5JR08, Q75MX0
7	GO:0090370	negative regulation of cholesterol efflux	Biological Process	1	A0A087X1T2
7	GO:0045859	regulation of protein kinase activity	Biological Process	3	Q5JR08, Q8N4P8, B2R841
7	GO:0034723	DNA replication-dependent nucleosome organization	Biological Process	1	Q5TEC6
7	GO:0014033	neural crest cell differentiation	Biological Process	1	Q75MX0
7	GO:0006695	cholesterol biosynthetic process	Biological Process	1	B3KRC6
7	GO:0006357	regulation of transcription from RNA polymerase II promoter	Biological Process	12	Q09472, Q96T88, C9JCN8, P08581, B2R841, A0A087X1T2, Q9BVP2, A5YRV2, P17096, Q9Y6H1, F8VZJ2, F1JVV5
7	GO:0006470	protein dephosphorylation	Biological Process	1	B5BU78
7	GO:0045944	positive regulation of transcription from RNA polymerase II promoter	Biological Process	8	Q09472, Q96T88, P08581, Q9BVP2, A0A087X1T2, A5YRV2, Q9Y6H1, F1JVV5
7	GO:0052548	regulation of endopeptidase activity	Biological Process	1	B6CGU5
7	GO:1902254	negative regulation of intrinsic apoptotic signaling pathway by p53 class mediator	Biological Process	1	A5YRV2
7	GO:0070613	regulation of protein processing	Biological Process	1	P08582
7	GO:0007409	axonogenesis	Biological Process	2	Q5JR08, Q75MX0
7	GO:0070126	mitochondrial translational termination	Biological Process	2	P82914, Q6FHK1
7	GO:0006399	tRNA metabolic process	Biological Process	2	H0UI22, Q5VV42
7	GO:0090049	regulation of cell migration involved in sprouting angiogenesis	Biological Process	1	Q5JR08
7	GO:0045841	negative regulation of mitotic metaphase/anaphase transition	Biological Process	1	B2R841
7	GO:0009127	purine nucleoside monophosphate biosynthetic process	Biological Process	1	A0A097PY54
7	GO:0006402	mRNA catabolic process	Biological Process	8	P62861, P63173, P62273, P83881, J3QR09, P62081, P62857, P62269
7	GO:0019941	modification-dependent protein catabolic process	Biological Process	3	Q96T88, B2R841, B2R4U3
7	GO:0006607	NLS-bearing protein import into nucleus	Biological Process	2	A0A024R2W4, A8K7D9
7	GO:0006699	bile acid biosynthetic process	Biological Process	1	B4DE67
7	GO:1902253	regulation of intrinsic apoptotic signaling pathway by p53 class mediator	Biological Process	1	A5YRV2
7	GO:0006289	nucleotide-excision repair	Biological Process	1	Q09472
7	GO:0098660	inorganic ion transmembrane transport	Biological Process	1	A0A097PY54
7	GO:1903052	positive regulation of proteolysis involved in cellular protein catabolic process	Biological Process	2	B2R841, B2R4U3
7	GO:0051443	positive regulation of ubiquitin-protein transferase activity	Biological Process	2	B2R841, B2R4U3
7	GO:0070972	protein localization to endoplasmic reticulum	Biological Process	8	P62861, P63173, P62273, P83881, J3QR09, P62081, P62857, P62269
7	GO:0090311	regulation of protein deacetylation	Biological Process	1	Q09472
7	GO:0042451	purine nucleoside biosynthetic process	Biological Process	2	A0A097PY54, A0A140VJE0
7	GO:0042771	intrinsic apoptotic signaling pathway in response to DNA damage by p53 class mediator	Biological Process	2	Q09472, A5YRV2
7	GO:1904666	regulation of ubiquitin protein ligase activity	Biological Process	2	B2R841, B2R4U3
7	GO:0051258	protein polymerization	Biological Process	1	B2R4U3
7	GO:0051004	regulation of lipoprotein lipase activity	Biological Process	1	A8KAQ3
7	GO:0033342	negative regulation of collagen binding	Biological Process	1	Q8N4P8
7	GO:1902165	regulation of intrinsic apoptotic signaling pathway in response to DNA damage by p53 class mediator	Biological Process	1	A5YRV2
7	GO:0010954	positive regulation of protein processing	Biological Process	1	P08582
7	GO:0006366	transcription from RNA polymerase II promoter	Biological Process	12	Q09472, C9JCN8, A0A087X1T2, Q9BVP2, Q9Y6H1, F8VZJ2, Q96T88, P08581, B2R841, A5YRV2, P17096, F1JVV5
7	GO:0031571	mitotic G1 DNA damage checkpoint	Biological Process	2	Q09472, A5YRV2
7	GO:0009126	purine nucleoside monophosphate metabolic process	Biological Process	4	O75438, A0A097PY54, O43678, P07311
7	GO:0031507	heterochromatin assembly	Biological Process	1	P17096
7	GO:0070585	protein localization to mitochondrion	Biological Process	2	B2R4N3, A0A087X1T2
7	GO:0007601	visual perception	Biological Process	1	O75911
7	GO:0051262	protein tetramerization	Biological Process	1	Q5TEC6
7	GO:0043624	cellular protein complex disassembly	Biological Process	2	P82914, Q6FHK1
7	GO:0046128	purine ribonucleoside metabolic process	Biological Process	5	O75438, A0A097PY54, O43678, A0A140VJE0, P07311
7	GO:0008380	RNA splicing	Biological Process	1	Q12872
7	GO:0006509	membrane protein ectodomain proteolysis	Biological Process	1	A0A024R2W4
7	GO:0032509	endosome transport via multivesicular body sorting pathway	Biological Process	1	A8KAQ3
7	GO:0015825	L-serine transport	Biological Process	1	A0A0A0MTB0
7	GO:0032374	regulation of cholesterol transport	Biological Process	1	A0A087X1T2
7	GO:0036003	positive regulation of transcription from RNA polymerase II promoter in response to stress	Biological Process	1	A5YRV2
7	GO:0070125	mitochondrial translational elongation	Biological Process	2	P82914, Q6FHK1
7	GO:1902600	hydrogen ion transmembrane transport	Biological Process	1	A0A097PY54
7	GO:1903508	positive regulation of nucleic acid-templated transcription	Biological Process	10	Q09472, C9JCN8, Q96T88, P08581, Q9BVP2, A0A087X1T2, A5YRV2, P17096, Q9Y6H1, F1JVV5
7	GO:0030071	regulation of mitotic metaphase/anaphase transition	Biological Process	1	B2R841
7	GO:1901983	regulation of protein acetylation	Biological Process	1	A5YRV2
7	GO:1903322	positive regulation of protein modification by small protein conjugation or removal	Biological Process	3	B2R841, Q9BVP2, B2R4U3
7	GO:0006337	nucleosome disassembly	Biological Process	1	P17096
7	GO:1905039	carboxylic acid transmembrane transport	Biological Process	1	Q9HBR0
7	GO:0006636	unsaturated fatty acid biosynthetic process	Biological Process	1	O00767
7	GO:0032781	positive regulation of ATPase activity	Biological Process	1	Q96T88
7	GO:0046942	carboxylic acid transport	Biological Process	2	A0A0A0MTB0, Q9HBR0
7	GO:0006284	base-excision repair	Biological Process	1	P17096
7	GO:0016072	rRNA metabolic process	Biological Process	17	O95478, Q13895, Q6DKI1, J3QR09, P62081, Q8IY37, Q9H9Y2, B2R823, Q9BVJ6, P62861, P63173, P62273, P83881, P62857, P62269, A8K201, Q96GA3
7	GO:0030521	androgen receptor signaling pathway	Biological Process	1	Q09472
7	GO:0060193	positive regulation of lipase activity	Biological Process	1	Q5JR08
7	GO:0016570	histone modification	Biological Process	4	Q09472, Q96T88, A5YRV2, Q5JXX1
7	GO:1903321	negative regulation of protein modification by small protein conjugation or removal	Biological Process	2	Q8N4P8, B2R4U3
7	GO:0009260	ribonucleotide biosynthetic process	Biological Process	1	A0A097PY54
7	GO:0050657	nucleic acid transport	Biological Process	1	A0A024RDF4
7	GO:0043923	positive regulation by host of viral transcription	Biological Process	1	Q09472
7	GO:0006006	glucose metabolic process	Biological Process	1	P07311
7	GO:0033674	positive regulation of kinase activity	Biological Process	1	Q5JR08
7	GO:0009135	purine nucleoside diphosphate metabolic process	Biological Process	1	P07311
7	GO:2000045	regulation of G1/S transition of mitotic cell cycle	Biological Process	2	Q09472, A5YRV2
7	GO:0045664	regulation of neuron differentiation	Biological Process	2	Q5JR08, Q75MX0
7	GO:0042327	positive regulation of phosphorylation	Biological Process	3	Q5JR08, P08581, B2R841
7	GO:0048015	phosphatidylinositol-mediated signaling	Biological Process	1	Q5JR08
7	GO:1901800	positive regulation of proteasomal protein catabolic process	Biological Process	1	B2R841
7	GO:0006707	cholesterol catabolic process	Biological Process	1	B4DE48
7	GO:0006323	DNA packaging	Biological Process	2	Q5TEC6, P17096
7	GO:1903533	regulation of protein targeting	Biological Process	2	B2R4N3, A0A087X1T2
7	GO:0001837	epithelial to mesenchymal transition	Biological Process	1	A0A024R2W4
7	GO:0051444	negative regulation of ubiquitin-protein transferase activity	Biological Process	1	B2R4U3
7	GO:0051291	protein heterooligomerization	Biological Process	1	Q5TEC6
7	GO:0046949	fatty-acyl-CoA biosynthetic process	Biological Process	1	O00767
7	GO:0060070	canonical Wnt signaling pathway	Biological Process	1	Q9H5M4
7	GO:0051437	positive regulation of ubiquitin-protein ligase activity involved in regulation of mitotic cell cycle transition	Biological Process	2	B2R841, B2R4U3
7	GO:2000373	positive regulation of DNA topoisomerase (ATP-hydrolyzing) activity	Biological Process	1	Q96T88
7	GO:0035567	non-canonical Wnt signaling pathway	Biological Process	1	Q5JR08
7	GO:0002223	stimulatory C-type lectin receptor signaling pathway	Biological Process	1	Q09472
7	GO:0043161	proteasome-mediated ubiquitin-dependent protein catabolic process	Biological Process	2	B2R841, B2R4U3
7	GO:0043297	apical junction assembly	Biological Process	1	Q5JR08
7	GO:0031638	zymogen activation	Biological Process	1	P08582
7	GO:0006164	purine nucleotide biosynthetic process	Biological Process	1	A0A097PY54
7	GO:0007178	transmembrane receptor protein serine/threonine kinase signaling pathway	Biological Process	1	Q5JR08
7	GO:1903506	regulation of nucleic acid-templated transcription	Biological Process	13	Q09472, Q5TEC6, C9JCN8, A0A087X1T2, Q9BVP2, Q9Y6H1, F8VZJ2, Q96T88, P08581, B2R841, A5YRV2, P17096, F1JVV5
7	GO:0015672	monovalent inorganic cation transport	Biological Process	2	O75438, A0A097PY54
7	GO:0043252	sodium-independent organic anion transport	Biological Process	1	D6RIZ4
7	GO:0072330	monocarboxylic acid biosynthetic process	Biological Process	2	O00767, B4DE67
7	GO:1903320	regulation of protein modification by small protein conjugation or removal	Biological Process	4	Q8N4P8, B2R841, Q9BVP2, B2R4U3
7	GO:0043921	modulation by host of viral transcription	Biological Process	1	Q09472
7	GO:0046496	nicotinamide nucleotide metabolic process	Biological Process	1	P07311
7	GO:0048846	axon extension involved in axon guidance	Biological Process	1	Q75MX0
7	GO:0006468	protein phosphorylation	Biological Process	6	Q9H5M4, Q5JR08, P08581, Q8N4P8, B2R841, A0A024R2W4
8	GO:0034134	toll-like receptor 2 signaling pathway	Biological Process	1	B4DT46
8	GO:0010755	regulation of plasminogen activation	Biological Process	1	P08582
8	GO:2000758	positive regulation of peptidyl-lysine acetylation	Biological Process	1	A5YRV2
8	GO:0031145	anaphase-promoting complex-dependent catabolic process	Biological Process	2	B2R841, B2R4U3
8	GO:0070198	protein localization to chromosome, telomeric region	Biological Process	1	Q9BVP2
8	GO:0010874	regulation of cholesterol efflux	Biological Process	1	A0A087X1T2
8	GO:0098662	inorganic cation transmembrane transport	Biological Process	1	A0A097PY54
8	GO:0045860	positive regulation of protein kinase activity	Biological Process	1	Q5JR08
8	GO:0031396	regulation of protein ubiquitination	Biological Process	3	Q8N4P8, B2R841, B2R4U3
8	GO:2000756	regulation of peptidyl-lysine acetylation	Biological Process	1	A5YRV2
8	GO:0015758	glucose transport	Biological Process	1	A8KAQ3
8	GO:0035023	regulation of Rho protein signal transduction	Biological Process	1	P52735
8	GO:0016574	histone ubiquitination	Biological Process	1	Q96T88
8	GO:0051290	protein heterotetramerization	Biological Process	1	Q5TEC6
8	GO:0048013	ephrin receptor signaling pathway	Biological Process	2	Q5JR08, P52735
8	GO:0033344	cholesterol efflux	Biological Process	1	A0A087X1T2
8	GO:0090043	regulation of tubulin deacetylation	Biological Process	1	Q09472
8	GO:0001523	retinoid metabolic process	Biological Process	1	O75911
8	GO:1904667	negative regulation of ubiquitin protein ligase activity	Biological Process	1	B2R4U3
8	GO:0008033	tRNA processing	Biological Process	1	Q5VV42
8	GO:0000041	transition metal ion transport	Biological Process	1	P08582
8	GO:0048010	vascular endothelial growth factor receptor signaling pathway	Biological Process	3	Q5JR08, B4DT46, P52735
8	GO:0018107	peptidyl-threonine phosphorylation	Biological Process	1	B2R841
8	GO:0015985	energy coupled proton transport, down electrochemical gradient	Biological Process	1	A0A097PY54
8	GO:0009205	purine ribonucleoside triphosphate metabolic process	Biological Process	4	O75438, A0A097PY54, O43678, P07311
8	GO:0036148	phosphatidylglycerol acyl-chain remodeling	Biological Process	1	Q92604
8	GO:0016573	histone acetylation	Biological Process	3	Q09472, A5YRV2, Q5JXX1
8	GO:0061614	pri-miRNA transcription from RNA polymerase II promoter	Biological Process	1	Q9BVP2
8	GO:0000398	mRNA splicing, via spliceosome	Biological Process	1	Q12872
8	GO:1904668	positive regulation of ubiquitin protein ligase activity	Biological Process	2	B2R841, B2R4U3
8	GO:2000116	regulation of cysteine-type endopeptidase activity	Biological Process	1	B6CGU5
8	GO:0046487	glyoxylate metabolic process	Biological Process	1	Q6QN92
8	GO:0018105	peptidyl-serine phosphorylation	Biological Process	2	Q9H5M4, B2R841
8	GO:0038094	Fc-gamma receptor signaling pathway	Biological Process	1	P52735
8	GO:0006511	ubiquitin-dependent protein catabolic process	Biological Process	3	Q96T88, B2R841, B2R4U3
8	GO:0031398	positive regulation of protein ubiquitination	Biological Process	2	B2R841, B2R4U3
8	GO:0032434	regulation of proteasomal ubiquitin-dependent protein catabolic process	Biological Process	1	B2R841
8	GO:0018205	peptidyl-lysine modification	Biological Process	4	Q09472, Q9BVP2, A5YRV2, Q5JXX1
8	GO:0035986	senescence-associated heterochromatin focus assembly	Biological Process	1	P17096
8	GO:0031397	negative regulation of protein ubiquitination	Biological Process	2	Q8N4P8, B2R4U3
8	GO:0009152	purine ribonucleotide biosynthetic process	Biological Process	1	A0A097PY54
8	GO:0006094	gluconeogenesis	Biological Process	1	P07311
8	GO:0010756	positive regulation of plasminogen activation	Biological Process	1	P08582
8	GO:0006814	sodium ion transport	Biological Process	1	O75438
8	GO:0032436	positive regulation of proteasomal ubiquitin-dependent protein catabolic process	Biological Process	1	B2R841
8	GO:0006473	protein acetylation	Biological Process	3	Q09472, A5YRV2, Q5JXX1
8	GO:1902893	regulation of pri-miRNA transcription from RNA polymerase II promoter	Biological Process	1	Q9BVP2
8	GO:0035338	long-chain fatty-acyl-CoA biosynthetic process	Biological Process	1	O00767
8	GO:0071900	regulation of protein serine/threonine kinase activity	Biological Process	3	Q5JR08, Q8N4P8, B2R841
8	GO:0000375	RNA splicing, via transesterification reactions	Biological Process	1	Q12872
8	GO:0000956	nuclear-transcribed mRNA catabolic process	Biological Process	8	P62861, P63173, P62273, P83881, J3QR09, P62081, P62857, P62269
8	GO:0006420	arginyl-tRNA aminoacylation	Biological Process	1	H0UI22
8	GO:0046034	ATP metabolic process	Biological Process	4	O75438, A0A097PY54, O43678, P07311
8	GO:0006283	transcription-coupled nucleotide-excision repair	Biological Process	1	Q09472
8	GO:0071168	protein localization to chromatin	Biological Process	1	B2R841
8	GO:2000060	positive regulation of protein ubiquitination involved in ubiquitin-dependent protein catabolic process	Biological Process	2	B2R841, B2R4U3
8	GO:0006614	SRP-dependent cotranslational protein targeting to membrane	Biological Process	8	P62861, P63173, P62273, P83881, J3QR09, P62081, P62857, P62269
8	GO:0038095	Fc-epsilon receptor signaling pathway	Biological Process	1	P52735
8	GO:1902895	positive regulation of pri-miRNA transcription from RNA polymerase II promoter	Biological Process	1	Q9BVP2
8	GO:0046031	ADP metabolic process	Biological Process	1	P07311
8	GO:0006469	negative regulation of protein kinase activity	Biological Process	1	B2R841
8	GO:0090240	positive regulation of histone H4 acetylation	Biological Process	1	A5YRV2
8	GO:0018210	peptidyl-threonine modification	Biological Process	1	B2R841
8	GO:0033233	regulation of protein sumoylation	Biological Process	1	Q9BVP2
8	GO:0031639	plasminogen activation	Biological Process	1	P08582
8	GO:2000058	regulation of protein ubiquitination involved in ubiquitin-dependent protein catabolic process	Biological Process	2	B2R841, B2R4U3
8	GO:0006474	N-terminal protein amino acid acetylation	Biological Process	1	Q09472
8	GO:0090239	regulation of histone H4 acetylation	Biological Process	1	A5YRV2
8	GO:0010799	regulation of peptidyl-threonine phosphorylation	Biological Process	1	B2R841
8	GO:0033235	positive regulation of protein sumoylation	Biological Process	1	Q9BVP2
8	GO:0009206	purine ribonucleoside triphosphate biosynthetic process	Biological Process	1	A0A097PY54
8	GO:0009167	purine ribonucleoside monophosphate metabolic process	Biological Process	4	O75438, A0A097PY54, O43678, P07311
8	GO:0006476	protein deacetylation	Biological Process	1	Q09472
8	GO:0046129	purine ribonucleoside biosynthetic process	Biological Process	2	A0A097PY54, A0A140VJE0
8	GO:0007266	Rho protein signal transduction	Biological Process	3	Q52LW3, Q5JR08, P52735
8	GO:0006978	DNA damage response, signal transduction by p53 class mediator resulting in transcription of p21 class mediator	Biological Process	1	A5YRV2
8	GO:0006303	double-strand break repair via nonhomologous end joining	Biological Process	1	Q5TEC6
8	GO:0010800	positive regulation of peptidyl-threonine phosphorylation	Biological Process	1	B2R841
8	GO:0006090	pyruvate metabolic process	Biological Process	1	P07311
8	GO:0009179	purine ribonucleoside diphosphate metabolic process	Biological Process	1	P07311
8	GO:0051005	negative regulation of lipoprotein lipase activity	Biological Process	1	A8KAQ3
8	GO:0018874	benzoate metabolic process	Biological Process	1	P07311
8	GO:0018209	peptidyl-serine modification	Biological Process	2	Q9H5M4, B2R841
8	GO:0043534	blood vessel endothelial cell migration	Biological Process	1	Q5JR08
8	GO:0032446	protein modification by small protein conjugation	Biological Process	5	Q96T88, Q8N4P8, B2R841, Q9BVP2, B2R4U3
8	GO:0009168	purine ribonucleoside monophosphate biosynthetic process	Biological Process	1	A0A097PY54
9	GO:0018076	N-terminal peptidyl-lysine acetylation	Biological Process	1	Q09472
9	GO:0090042	tubulin deacetylation	Biological Process	1	Q09472
9	GO:0000377	RNA splicing, via transesterification reactions with bulged adenosine as nucleophile	Biological Process	1	Q12872
9	GO:0006475	internal protein amino acid acetylation	Biological Process	3	Q09472, A5YRV2, Q5JXX1
9	GO:0000184	nuclear-transcribed mRNA catabolic process, nonsense-mediated decay	Biological Process	8	P62861, P63173, P62273, P83881, J3QR09, P62081, P62857, P62269
9	GO:0015986	ATP synthesis coupled proton transport	Biological Process	1	A0A097PY54
9	GO:0016925	protein sumoylation	Biological Process	1	Q9BVP2
9	GO:0046323	glucose import	Biological Process	1	A8KAQ3
9	GO:0043969	histone H2B acetylation	Biological Process	1	Q09472
9	GO:0006826	iron ion transport	Biological Process	1	P08582
9	GO:0043967	histone H4 acetylation	Biological Process	2	Q09472, A5YRV2
9	GO:0042787	protein ubiquitination involved in ubiquitin-dependent protein catabolic process	Biological Process	3	Q96T88, B2R841, B2R4U3
9	GO:0071901	negative regulation of protein serine/threonine kinase activity	Biological Process	1	B2R841
9	GO:0018394	peptidyl-lysine acetylation	Biological Process	3	Q09472, A5YRV2, Q5JXX1
9	GO:0016567	protein ubiquitination	Biological Process	4	Q96T88, Q8N4P8, B2R841, B2R4U3
9	GO:0071902	positive regulation of protein serine/threonine kinase activity	Biological Process	1	Q5JR08
9	GO:0006754	ATP biosynthetic process	Biological Process	1	A0A097PY54
10	GO:0018393	internal peptidyl-lysine acetylation	Biological Process	3	Q09472, A5YRV2, Q5JXX1
10	GO:0051865	protein autoubiquitination	Biological Process	1	Q96T88
10	GO:0097286	iron ion import	Biological Process	1	P08582
10	GO:0000209	protein polyubiquitination	Biological Process	1	B2R4U3
11	GO:0070979	protein K11-linked ubiquitination	Biological Process	1	B2R4U3
11	GO:0070936	protein K48-linked ubiquitination	Biological Process	1	B2R4U3

## Sheet: MF
GO function annotation and analysis different expressed proteins of OXA vs. control MF
Level	GO_ID	Term	Type	Seqs_Num	Sequences
1	GO:0003674	molecular_function	Molecular Function	100	Q6DKI1, A0A0A0MTB0, B3KXW2, B3KNS8, Q5VV42, P62081, H0YNP9, Q5JR08, Q96T88, Q6PJ25, H0UI22, Q9NSI2, B4DYY3, A0A0S2Z5K6, P82914, Q92604, A0A097PY54, Q9Y6H1, D6RIZ4, Q6QN92, B4DND9, F8VZJ2, P63173, A0A024R8K7, B3KRC6, H3BMQ2, Q9H5M4, Q09472, Q13895, Q8NEF9, Q9BVP2, P52735, A8KAQ3, E9PM82, Q9Y3C1, P17096, B1ALI9, Q9Y6A5, F1JVV5, Q6FHK1, O00458, O75911, A0A024R7S3, C9JCN8, Q14517, Q13823, B4DE48, Q8I…
2	GO:0009055	electron carrier activity	Molecular Function	2	O75911, B4DT46
2	GO:0003824	catalytic activity	Molecular Function	33	O00767, Q9H5M4, Q09472, Q9BVP2, A0A087X1T2, Q5VV42, H0YNP9, B5BU78, Q5JR08, Q96T88, Q6PJ25, P08581, H0UI22, B2R841, B2R4U3, P53609, P17096, B4DT46, A0A140VJE0, P07311, B6CGU5, O75438, O75911, Q92604, Q8N4P8, Q13823, A0A097PY54, B4DE67, Q2M2H8, Q8IY37, Q6QN92, Q9NY93, B3KRC6
2	GO:0005215	transporter activity	Molecular Function	6	Q6PJ25, A0A097PY54, A0A0A0MTB0, D6RIZ4, A8K7D9, Q9HBR0
2	GO:0005488	binding	Molecular Function	90	O95478, Q6DKI1, Q96EX3, B3KXW2, B3KNS8, P62081, Q5VV42, H0YNP9, Q5T280, B2R823, Q5JR08, Q96T88, Q6PJ25, H0UI22, Q9NSI2, P62273, P53609, D3DR37, A0A140VJE0, A0A0S2Z5K6, B4DYY3, B6CGU5, Q52LW3, P82914, Q12872, A0A024RDF4, J3QR09, B0AZV9, Q2M2H8, Q9Y6H1, O43805, Q9NY93, B4DND9, F8VZJ2, P63173, A0A024R8K7, P83881, B3KRC6, H3BMQ2, O00767, Q9H5M4, Q09472, Q13895, Q5TEC6, Q8NEF9, A0A087X1T2, Q9BVP2, A6N…
2	GO:0005198	structural molecule activity	Molecular Function	14	P82914, A0A024R7S3, O15230, J3QR09, P62081, B3KS36, P62861, P63173, P62273, P83881, P62857, A0A024R2W4, P62269, Q6FHK1
2	GO:0000988	transcription factor activity, protein binding	Molecular Function	3	Q09472, A5YRV2, P17096
2	GO:0001071	nucleic acid binding transcription factor activity	Molecular Function	5	C9JCN8, Q96T88, A0A087X1T2, P17096, F1JVV5
2	GO:0060089	molecular transducer activity	Molecular Function	3	P08581, A0A024R8K7, A8KAQ3
2	GO:0004871	signal transducer activity	Molecular Function	3	Q5JR08, P08581, A8KAQ3
2	GO:0098772	molecular function regulator	Molecular Function	2	Q52LW3, P52735
3	GO:0090484	drug transporter activity	Molecular Function	1	D6RIZ4
3	GO:0030234	enzyme regulator activity	Molecular Function	1	Q52LW3
3	GO:0016491	oxidoreductase activity	Molecular Function	5	O00767, O75438, O75911, B4DT46, B3KRC6
3	GO:1905361	L-serine transporter activity	Molecular Function	1	A0A0A0MTB0
3	GO:0016874	ligase activity	Molecular Function	1	H0UI22
3	GO:0000989	transcription factor activity, transcription factor binding	Molecular Function	3	Q09472, A5YRV2, P17096
3	GO:0003735	structural constituent of ribosome	Molecular Function	11	P82914, P62861, P63173, P62273, P83881, J3QR09, P62081, P62857, P62269, B3KS36, Q6FHK1
3	GO:0044877	macromolecular complex binding	Molecular Function	6	Q09472, Q5TEC6, Q96T88, B2R841, O15230, P17096
3	GO:1901363	heterocyclic compound binding	Molecular Function	53	O95478, Q6DKI1, B3KXW2, B3KNS8, P62081, Q5T280, B2R823, Q5JR08, Q96T88, Q6PJ25, H0UI22, A0A140VJE0, P82914, Q12872, A0A024RDF4, J3QR09, Q9Y6H1, Q9NY93, B4DND9, P63173, P83881, B3KRC6, Q9H5M4, Q5TEC6, Q09472, Q13895, Q8NEF9, A0A087X1T2, Q9BVP2, E9PM82, Q9H9Y2, P08581, Q9Y3C1, B2R841, P17096, B4DT46, P62857, Q86U90, F1JVV5, Q6FHK1, O75911, C9JCN8, Q8N4P8, Q13823, Q8IY37, B3KS36, P62861, Q6IAM0, Q9B…
3	GO:0016829	lyase activity	Molecular Function	1	P17096
3	GO:0004872	receptor activity	Molecular Function	3	P08581, A0A024R8K7, A8KAQ3
3	GO:0008289	lipid binding	Molecular Function	2	B4DE48, F6TR53
3	GO:0022857	transmembrane transporter activity	Molecular Function	4	A0A097PY54, A0A0A0MTB0, D6RIZ4, Q9HBR0
3	GO:0097367	carbohydrate derivative binding	Molecular Function	11	Q9H5M4, Q5JR08, Q8N4P8, P08581, Q6PJ25, Q9BVP2, Q13823, B2R841, H0UI22, Q8IY37, Q9NY93
3	GO:0016740	transferase activity	Molecular Function	11	Q9H5M4, Q09472, Q96T88, Q92604, P08581, B2R841, B2R4U3, P53609, Q5VV42, A0A140VJE0, Q6QN92
3	GO:0003700	transcription factor activity, sequence-specific DNA binding	Molecular Function	5	C9JCN8, Q96T88, A0A087X1T2, P17096, F1JVV5
3	GO:0005515	protein binding	Molecular Function	63	Q96EX3, P62081, Q5VV42, H0YNP9, Q5JR08, Q96T88, Q6PJ25, Q9NSI2, D3DR37, B4DYY3, A0A0S2Z5K6, B6CGU5, Q52LW3, Q12872, A0A024RDF4, J3QR09, B0AZV9, Q9Y6H1, O43805, F8VZJ2, A0A024R8K7, P83881, H3BMQ2, Q9H5M4, Q09472, Q5TEC6, Q13895, A0A087X1T2, Q9BVP2, A6NLH6, P52735, A8KAQ3, Q75MX0, Q9H9Y2, P08581, Q03169, B2R841, P08582, B2R4U3, B4DT46, P17096, A0A024R2W4, P62857, B1ALI9, Q9Y6A5, F1JVV5, Q96GA3, Q6F…
3	GO:0016787	hydrolase activity	Molecular Function	15	B6CGU5, Q8N4P8, Q9BVP2, Q13823, A0A097PY54, B4DE67, Q2M2H8, Q8IY37, H0YNP9, Q9NY93, B5BU78, Q5JR08, Q6PJ25, P17096, P07311
3	GO:0005085	guanyl-nucleotide exchange factor activity	Molecular Function	1	P52735
3	GO:0097159	organic cyclic compound binding	Molecular Function	53	O95478, Q6DKI1, B3KXW2, B3KNS8, P62081, Q5T280, B2R823, Q5JR08, Q96T88, Q6PJ25, H0UI22, A0A140VJE0, P82914, Q12872, A0A024RDF4, J3QR09, Q9Y6H1, Q9NY93, B4DND9, P63173, P83881, B3KRC6, Q9H5M4, Q5TEC6, Q09472, Q13895, Q8NEF9, A0A087X1T2, Q9BVP2, E9PM82, Q9H9Y2, P08581, Q9Y3C1, B2R841, P17096, B4DT46, P62857, Q86U90, F1JVV5, Q6FHK1, O75911, C9JCN8, Q8N4P8, Q13823, Q8IY37, B3KS36, P62861, Q6IAM0, Q9B…
3	GO:0016853	isomerase activity	Molecular Function	1	A0A087X1T2
3	GO:0038023	signaling receptor activity	Molecular Function	2	P08581, A8KAQ3
3	GO:0008307	structural constituent of muscle	Molecular Function	1	A0A024R2W4
3	GO:0022892	substrate-specific transporter activity	Molecular Function	6	Q6PJ25, A0A097PY54, A0A0A0MTB0, A8K7D9, D6RIZ4, Q9HBR0
3	GO:0036094	small molecule binding	Molecular Function	15	Q9H5M4, O75911, Q8N4P8, Q9BVP2, Q13823, A0A024RDF4, Q8IY37, Q9NY93, Q5JR08, Q96T88, Q6IAM0, P08581, Q6PJ25, B2R841, H0UI22
3	GO:0033218	amide binding	Molecular Function	1	A8K7D9
3	GO:0043167	ion binding	Molecular Function	11	O00767, Q09472, Q96T88, Q6PJ25, Q14517, P08582, P62273, P53609, B3KXW2, B3KRC6, A0A024R2W4
3	GO:0030246	carbohydrate binding	Molecular Function	1	Q2M2H8
3	GO:0032451	demethylase activity	Molecular Function	1	B3KRC6
3	GO:0051540	metal cluster binding	Molecular Function	1	Q5VV42
4	GO:0016875	ligase activity, forming carbon-oxygen bonds	Molecular Function	1	H0UI22
4	GO:0019899	enzyme binding	Molecular Function	7	Q5JR08, P08581, B2R841, P17096, B1ALI9, A8K7D9, A8KAQ3
4	GO:0000981	RNA polymerase II transcription factor activity, sequence-specific DNA binding	Molecular Function	4	C9JCN8, A0A087X1T2, P17096, F1JVV5
4	GO:0000166	nucleotide binding	Molecular Function	15	Q9H5M4, O75911, Q8N4P8, Q9BVP2, Q13823, A0A024RDF4, Q8IY37, Q9NY93, Q5JR08, Q96T88, Q6IAM0, P08581, Q6PJ25, B2R841, H0UI22
4	GO:0003712	transcription cofactor activity	Molecular Function	3	Q09472, A5YRV2, P17096
4	GO:0016705	oxidoreductase activity, acting on paired donors, with incorporation or reduction of molecular oxygen	Molecular Function	2	O00767, B3KRC6
4	GO:0008565	protein transporter activity	Molecular Function	1	A8K7D9
4	GO:0042895	antibiotic transporter activity	Molecular Function	1	D6RIZ4
4	GO:0042277	peptide binding	Molecular Function	1	A8K7D9
4	GO:0005543	phospholipid binding	Molecular Function	2	B4DE48, F6TR53
4	GO:0016782	transferase activity, transferring sulfur-containing groups	Molecular Function	1	Q5VV42
4	GO:0016765	transferase activity, transferring alkyl or aryl (other than methyl) groups	Molecular Function	1	P53609
4	GO:0008013	beta-catenin binding	Molecular Function	1	Q09472
4	GO:0001882	nucleoside binding	Molecular Function	11	Q9H5M4, Q5JR08, Q8N4P8, P08581, Q6PJ25, Q9BVP2, Q13823, B2R841, H0UI22, Q8IY37, Q9NY93
4	GO:0002039	p53 binding	Molecular Function	1	A5YRV2
4	GO:0003682	chromatin binding	Molecular Function	4	Q5TEC6, Q09472, Q96T88, P17096
4	GO:0019787	ubiquitin-like protein transferase activity	Molecular Function	2	Q96T88, B2R4U3
4	GO:0005319	lipid transporter activity	Molecular Function	1	Q6PJ25
4	GO:0008047	enzyme activator activity	Molecular Function	1	Q52LW3
4	GO:0046983	protein dimerization activity	Molecular Function	4	Q5TEC6, A0A087X1T2, B4DT46, F1JVV5
4	GO:0015194	L-serine transmembrane transporter activity	Molecular Function	1	A0A0A0MTB0
4	GO:0004497	monooxygenase activity	Molecular Function	1	B3KRC6
4	GO:0004888	transmembrane signaling receptor activity	Molecular Function	2	P08581, A8KAQ3
4	GO:1901265	nucleoside phosphate binding	Molecular Function	15	Q9H5M4, O75911, Q8N4P8, Q9BVP2, Q13823, A0A024RDF4, Q8IY37, Q9NY93, Q5JR08, Q96T88, Q6IAM0, P08581, Q6PJ25, B2R841, H0UI22
4	GO:0016772	transferase activity, transferring phosphorus-containing groups	Molecular Function	4	Q9H5M4, P08581, B2R841, A0A140VJE0
4	GO:0016798	hydrolase activity, acting on glycosyl bonds	Molecular Function	1	Q2M2H8
4	GO:0016741	transferase activity, transferring one-carbon groups	Molecular Function	1	Q6QN92
4	GO:0005088	Ras guanyl-nucleotide exchange factor activity	Molecular Function	1	P52735
4	GO:0008022	protein C-terminus binding	Molecular Function	3	Q09472, A0A087X1T2, B4DE48
4	GO:0008233	peptidase activity	Molecular Function	1	B6CGU5
4	GO:0099600	transmembrane receptor activity	Molecular Function	2	P08581, A8KAQ3
4	GO:0016614	oxidoreductase activity, acting on CH-OH group of donors	Molecular Function	1	O75911
4	GO:0008134	transcription factor binding	Molecular Function	6	Q09472, C9JCN8, P17096, Q9Y6H1, B4DYY3, F1JVV5
4	GO:0050839	cell adhesion molecule binding	Molecular Function	1	O15230
4	GO:0005102	receptor binding	Molecular Function	8	Q09472, A0A024R8K7, O15230, P17096, A6NLH6, B4DE48, B4DYY3, Q75MX0
4	GO:0008092	cytoskeletal protein binding	Molecular Function	4	Q5JR08, Q9Y4B5, B2R841, A0A024R2W4
4	GO:0042393	histone binding	Molecular Function	2	Q5TEC6, Q96T88
4	GO:0051536	iron-sulfur cluster binding	Molecular Function	1	Q5VV42
4	GO:0016817	hydrolase activity, acting on acid anhydrides	Molecular Function	7	Q5JR08, Q8N4P8, Q6PJ25, A0A097PY54, Q8IY37, Q9NY93, P07311
4	GO:0019904	protein domain specific binding	Molecular Function	3	Q52LW3, B4DT46, A0A024R2W4
4	GO:0005030	neurotrophin receptor activity	Molecular Function	1	A8KAQ3
4	GO:0016835	carbon-oxygen lyase activity	Molecular Function	1	P17096
4	GO:0043169	cation binding	Molecular Function	11	O00767, Q09472, Q96T88, Q6PJ25, Q14517, P08582, P62273, P53609, B3KXW2, B3KRC6, A0A024R2W4
4	GO:0016788	hydrolase activity, acting on ester bonds	Molecular Function	3	P17096, B4DE67, B5BU78
4	GO:0046906	tetrapyrrole binding	Molecular Function	2	B4DT46, B3KRC6
4	GO:0060589	nucleoside-triphosphatase regulator activity	Molecular Function	1	Q52LW3
4	GO:0016860	intramolecular oxidoreductase activity	Molecular Function	1	A0A087X1T2
4	GO:0022891	substrate-specific transmembrane transporter activity	Molecular Function	4	A0A097PY54, A0A0A0MTB0, D6RIZ4, Q9HBR0
4	GO:0042802	identical protein binding	Molecular Function	1	F1JVV5
4	GO:0003676	nucleic acid binding	Molecular Function	45	O95478, Q5TEC6, Q13895, Q09472, Q8NEF9, Q9BVP2, Q6DKI1, A0A087X1T2, B3KNS8, B3KXW2, P62081, E9PM82, Q9H9Y2, Q5T280, B2R823, Q96T88, Q9Y3C1, H0UI22, P17096, P62857, A0A140VJE0, Q86U90, F1JVV5, Q6FHK1, P82914, Q12872, C9JCN8, Q8N4P8, Q13823, A0A024RDF4, J3QR09, Q8IY37, Q9Y6H1, B3KS36, Q9NY93, B4DND9, Q6IAM0, Q9BVJ6, Q9Y4B5, P62861, P63173, P83881, A5YRV2, A8K7D9, P62269
4	GO:0019838	growth factor binding	Molecular Function	2	A0A024R8K7, A8KAQ3
4	GO:0032553	ribonucleotide binding	Molecular Function	11	Q9H5M4, Q5JR08, Q8N4P8, P08581, Q6PJ25, Q9BVP2, Q13823, B2R841, H0UI22, Q8IY37, Q9NY93
4	GO:0032403	protein complex binding	Molecular Function	3	Q5TEC6, B2R841, O15230
4	GO:0016746	transferase activity, transferring acyl groups	Molecular Function	2	Q09472, Q92604
4	GO:0008398	sterol 14-demethylase activity	Molecular Function	1	B3KRC6
4	GO:0016651	oxidoreductase activity, acting on NAD(P)H	Molecular Function	2	O75438, B4DT46
5	GO:0003713	transcription coactivator activity	Molecular Function	2	Q09472, P17096
5	GO:0001067	regulatory region nucleic acid binding	Molecular Function	7	Q5TEC6, Q09472, C9JCN8, Q96T88, A0A087X1T2, A5YRV2, F1JVV5
5	GO:0005520	insulin-like growth factor binding	Molecular Function	1	A0A024R8K7
5	GO:0010997	anaphase-promoting complex binding	Molecular Function	1	B2R841
5	GO:0042169	SH2 domain binding	Molecular Function	1	A0A024R2W4
5	GO:0016298	lipase activity	Molecular Function	1	B4DE67
5	GO:0046872	metal ion binding	Molecular Function	11	O00767, Q09472, Q96T88, Q6PJ25, Q14517, P08582, P62273, P53609, B3KXW2, B3KRC6, A0A024R2W4
5	GO:0005178	integrin binding	Molecular Function	1	O15230
5	GO:0004659	prenyltransferase activity	Molecular Function	1	P53609
5	GO:0010465	nerve growth factor receptor activity	Molecular Function	1	A8KAQ3
5	GO:0005048	signal sequence binding	Molecular Function	1	A8K7D9
5	GO:0003954	NADH dehydrogenase activity	Molecular Function	1	O75438
5	GO:0051539	4 iron, 4 sulfur cluster binding	Molecular Function	1	Q5VV42
5	GO:0017166	vinculin binding	Molecular Function	1	A0A024R2W4
5	GO:0017124	SH3 domain binding	Molecular Function	1	B4DT46
5	GO:0005126	cytokine receptor binding	Molecular Function	1	A6NLH6
5	GO:0003723	RNA binding	Molecular Function	36	O95478, Q13895, Q8NEF9, Q9BVP2, Q6DKI1, B3KNS8, P62081, E9PM82, Q9H9Y2, Q5T280, B2R823, Q9Y3C1, H0UI22, Q86U90, P62857, A0A140VJE0, F1JVV5, Q6FHK1, P82914, Q12872, Q8N4P8, Q13823, A0A024RDF4, J3QR09, Q8IY37, B3KS36, Q9NY93, B4DND9, Q6IAM0, Q9BVJ6, Q9Y4B5, P62861, P63173, P83881, A8K7D9, P62269
5	GO:0005548	phospholipid transporter activity	Molecular Function	1	Q6PJ25
5	GO:0052689	carboxylic ester hydrolase activity	Molecular Function	1	B4DE67
5	GO:0051427	hormone receptor binding	Molecular Function	2	Q09472, P17096
5	GO:0042805	actinin binding	Molecular Function	1	A0A024R2W4
5	GO:0017076	purine nucleotide binding	Molecular Function	11	Q9H5M4, Q5JR08, Q8N4P8, P08581, Q6PJ25, Q9BVP2, Q13823, B2R841, H0UI22, Q8IY37, Q9NY93
5	GO:0005119	smoothened binding	Molecular Function	1	B4DYY3
5	GO:0003677	DNA binding	Molecular Function	11	Q5TEC6, Q09472, Q96T88, C9JCN8, A0A087X1T2, A5YRV2, A0A024RDF4, P17096, B3KXW2, Q9Y6H1, F1JVV5
5	GO:0042578	phosphoric ester hydrolase activity	Molecular Function	1	B5BU78
5	GO:0001664	G-protein coupled receptor binding	Molecular Function	2	A0A024R8K7, A6NLH6
5	GO:0016863	intramolecular oxidoreductase activity, transposing C=C bonds	Molecular Function	1	A0A087X1T2
5	GO:0015631	tubulin binding	Molecular Function	3	Q9Y4B5, B2R841, A0A024R2W4
5	GO:0019902	phosphatase binding	Molecular Function	1	P08581
5	GO:0032549	ribonucleoside binding	Molecular Function	11	Q9H5M4, Q5JR08, Q8N4P8, P08581, Q6PJ25, Q9BVP2, Q13823, B2R841, H0UI22, Q8IY37, Q9NY93
5	GO:0008493	tetracycline transporter activity	Molecular Function	1	D6RIZ4
5	GO:0003906	DNA-(apurinic or apyrimidinic site) lyase activity	Molecular Function	1	P17096
5	GO:0030379	neurotensin receptor activity, non-G-protein coupled	Molecular Function	1	A8KAQ3
5	GO:0005113	patched binding	Molecular Function	1	B4DYY3
5	GO:0046982	protein heterodimerization activity	Molecular Function	3	Q5TEC6, B4DT46, F1JVV5
5	GO:0005096	GTPase activator activity	Molecular Function	1	Q52LW3
5	GO:0030695	GTPase regulator activity	Molecular Function	1	Q52LW3
5	GO:0016876	ligase activity, forming aminoacyl-tRNA and related compounds	Molecular Function	1	H0UI22
5	GO:0016301	kinase activity	Molecular Function	4	Q9H5M4, P08581, B2R841, A0A140VJE0
5	GO:0004518	nuclease activity	Molecular Function	1	P17096
5	GO:0043121	neurotrophin binding	Molecular Function	1	A8KAQ3
5	GO:0004842	ubiquitin-protein transferase activity	Molecular Function	2	Q96T88, B2R4U3
5	GO:0016717	oxidoreductase activity, acting on paired donors, with oxidation of a pair of donors resulting in the reduction of molecular oxygen to two molecules of water	Molecular Function	1	O00767
5	GO:0070491	repressing transcription factor binding	Molecular Function	1	B4DYY3
5	GO:0005342	organic acid transmembrane transporter activity	Molecular Function	2	A0A0A0MTB0, Q9HBR0
5	GO:0001228	transcriptional activator activity, RNA polymerase II transcription regulatory region sequence-specific binding	Molecular Function	2	P17096, F1JVV5
5	GO:0038132	neuregulin binding	Molecular Function	1	A0A024R8K7
5	GO:0031491	nucleosome binding	Molecular Function	1	Q5TEC6
5	GO:0001227	transcriptional repressor activity, RNA polymerase II transcription regulatory region sequence-specific binding	Molecular Function	1	A0A087X1T2
5	GO:0001085	RNA polymerase II transcription factor binding	Molecular Function	2	Q09472, B4DYY3
5	GO:0020037	heme binding	Molecular Function	2	B4DT46, B3KRC6
5	GO:0033613	activating transcription factor binding	Molecular Function	1	Q09472
5	GO:0001883	purine nucleoside binding	Molecular Function	11	Q9H5M4, Q5JR08, Q8N4P8, P08581, Q6PJ25, Q9BVP2, Q13823, B2R841, H0UI22, Q8IY37, Q9NY93
5	GO:0061650	ubiquitin-like protein conjugating enzyme activity	Molecular Function	1	B2R4U3
5	GO:0042975	peroxisome proliferator activated receptor binding	Molecular Function	1	P17096
5	GO:0070325	lipoprotein particle receptor binding	Molecular Function	1	B4DE48
5	GO:0016709	oxidoreductase activity, acting on paired donors, with incorporation or reduction of molecular oxygen, NAD(P)H as one donor, and incorporation of one atom of oxygen	Molecular Function	1	B3KRC6
5	GO:0070011	peptidase activity, acting on L-amino acid peptides	Molecular Function	1	B6CGU5
5	GO:0042974	retinoic acid receptor binding	Molecular Function	1	P17096
5	GO:0016655	oxidoreductase activity, acting on NAD(P)H, quinone or similar compound as acceptor	Molecular Function	1	O75438
5	GO:0030165	PDZ domain binding	Molecular Function	1	Q52LW3
5	GO:0050664	oxidoreductase activity, acting on NAD(P)H, oxygen as acceptor	Molecular Function	1	B4DT46
5	GO:0016773	phosphotransferase activity, alcohol group as acceptor	Molecular Function	4	Q9H5M4, P08581, B2R841, A0A140VJE0
5	GO:0008168	methyltransferase activity	Molecular Function	1	Q6QN92
5	GO:0031490	chromatin DNA binding	Molecular Function	1	Q5TEC6
5	GO:0015075	ion transmembrane transporter activity	Molecular Function	2	A0A097PY54, D6RIZ4
5	GO:0035091	phosphatidylinositol binding	Molecular Function	2	B4DE48, F6TR53
5	GO:0005089	Rho guanyl-nucleotide exchange factor activity	Molecular Function	1	P52735
5	GO:0050497	transferase activity, transferring alkylthio groups	Molecular Function	1	Q5VV42
5	GO:0035064	methylated histone binding	Molecular Function	1	Q96T88
5	GO:0032555	purine ribonucleotide binding	Molecular Function	11	Q9H5M4, Q5JR08, Q8N4P8, P08581, Q6PJ25, Q9BVP2, Q13823, B2R841, H0UI22, Q8IY37, Q9NY93
5	GO:0017022	myosin binding	Molecular Function	1	Q5JR08
5	GO:0008327	methyl-CpG binding	Molecular Function	1	Q96T88
5	GO:0044389	ubiquitin-like protein ligase binding	Molecular Function	1	B1ALI9
5	GO:0042826	histone deacetylase binding	Molecular Function	1	A8K7D9
5	GO:0016747	transferase activity, transferring acyl groups other than amino-acyl groups	Molecular Function	2	Q09472, Q92604
5	GO:0003779	actin binding	Molecular Function	1	A0A024R2W4
5	GO:0051575	5'-deoxyribose-5-phosphate lyase activity	Molecular Function	1	P17096
5	GO:0016616	oxidoreductase activity, acting on the CH-OH group of donors, NAD or NADP as acceptor	Molecular Function	1	O75911
5	GO:0004553	hydrolase activity, hydrolyzing O-glycosyl compounds	Molecular Function	1	Q2M2H8
5	GO:0000982	transcription factor activity, RNA polymerase II core promoter proximal region sequence-specific binding	Molecular Function	2	C9JCN8, A0A087X1T2
5	GO:0019900	kinase binding	Molecular Function	1	B2R841
5	GO:0019199	transmembrane receptor protein kinase activity	Molecular Function	1	P08581
5	GO:0016818	hydrolase activity, acting on acid anhydrides, in phosphorus-containing anhydrides	Molecular Function	7	Q5JR08, Q8N4P8, Q6PJ25, A0A097PY54, Q8IY37, Q9NY93, P07311
5	GO:0035639	purine ribonucleoside triphosphate binding	Molecular Function	11	Q9H5M4, Q5JR08, Q8N4P8, P08581, Q6PJ25, Q9BVP2, Q13823, B2R841, H0UI22, Q8IY37, Q9NY93
6	GO:0051393	alpha-actinin binding	Molecular Function	1	A0A024R2W4
6	GO:0008135	translation factor activity, RNA binding	Molecular Function	1	Q6IAM0
6	GO:0071617	lysophospholipid acyltransferase activity	Molecular Function	1	Q92604
6	GO:0016791	phosphatase activity	Molecular Function	1	B5BU78
6	GO:0008318	protein prenyltransferase activity	Molecular Function	1	P53609
6	GO:0008509	anion transmembrane transporter activity	Molecular Function	1	D6RIZ4
6	GO:0043565	sequence-specific DNA binding	Molecular Function	9	Q5TEC6, C9JCN8, Q96T88, A0A087X1T2, A5YRV2, A0A024RDF4, P17096, Q9Y6H1, F1JVV5
6	GO:0030554	adenyl nucleotide binding	Molecular Function	7	Q9H5M4, P08581, Q6PJ25, B2R841, H0UI22, Q8IY37, Q9NY93
6	GO:0050750	low-density lipoprotein particle receptor binding	Molecular Function	1	B4DE48
6	GO:0001078	transcriptional repressor activity, RNA polymerase II core promoter proximal region sequence-specific binding	Molecular Function	1	A0A087X1T2
6	GO:0004033	aldo-keto reductase (NADP) activity	Molecular Function	1	O75911
6	GO:0008374	O-acyltransferase activity	Molecular Function	1	Q92604
6	GO:0004047	aminomethyltransferase activity	Molecular Function	1	Q6QN92
6	GO:0005525	GTP binding	Molecular Function	4	Q5JR08, Q8N4P8, Q9BVP2, Q13823
6	GO:0004012	phospholipid-translocating ATPase activity	Molecular Function	1	Q6PJ25
6	GO:0031625	ubiquitin protein ligase binding	Molecular Function	1	B1ALI9
6	GO:0008324	cation transmembrane transporter activity	Molecular Function	1	A0A097PY54
6	GO:0032561	guanyl ribonucleotide binding	Molecular Function	4	Q5JR08, Q8N4P8, Q9BVP2, Q13823
6	GO:0005509	calcium ion binding	Molecular Function	2	Q14517, A0A024R2W4
6	GO:0019903	protein phosphatase binding	Molecular Function	1	P08581
6	GO:0019205	nucleobase-containing compound kinase activity	Molecular Function	1	A0A140VJE0
6	GO:0000287	magnesium ion binding	Molecular Function	1	Q6PJ25
6	GO:0000247	C-8 sterol isomerase activity	Molecular Function	1	A0A087X1T2
6	GO:0019843	rRNA binding	Molecular Function	1	Q9H9Y2
6	GO:0019001	guanyl nucleotide binding	Molecular Function	4	Q5JR08, Q8N4P8, Q9BVP2, Q13823
6	GO:0004519	endonuclease activity	Molecular Function	1	P17096
6	GO:0016407	acetyltransferase activity	Molecular Function	1	Q09472
6	GO:0000975	regulatory region DNA binding	Molecular Function	7	Q5TEC6, Q09472, C9JCN8, Q96T88, A0A087X1T2, A5YRV2, F1JVV5
6	GO:0046914	transition metal ion binding	Molecular Function	6	O00767, Q09472, Q96T88, P08582, P62273, B3KRC6
6	GO:0004714	transmembrane receptor protein tyrosine kinase activity	Molecular Function	1	P08581
6	GO:0032550	purine ribonucleoside binding	Molecular Function	11	Q9H5M4, Q5JR08, Q8N4P8, P08581, Q6PJ25, Q9BVP2, Q13823, B2R841, H0UI22, Q8IY37, Q9NY93
6	GO:0019901	protein kinase binding	Molecular Function	1	B2R841
6	GO:0004745	retinol dehydrogenase activity	Molecular Function	1	O75911
6	GO:0032559	adenyl ribonucleotide binding	Molecular Function	7	Q9H5M4, P08581, Q6PJ25, B2R841, H0UI22, Q8IY37, Q9NY93
6	GO:0004771	sterol esterase activity	Molecular Function	1	B4DE67
6	GO:0016462	pyrophosphatase activity	Molecular Function	6	Q5JR08, Q8N4P8, Q6PJ25, A0A097PY54, Q8IY37, Q9NY93
6	GO:0030374	ligand-dependent nuclear receptor transcription coactivator activity	Molecular Function	1	P17096
6	GO:0050136	NADH dehydrogenase (quinone) activity	Molecular Function	1	O75438
6	GO:0003998	acylphosphatase activity	Molecular Function	1	P07311
6	GO:0043566	structure-specific DNA binding	Molecular Function	1	Q5TEC6
6	GO:0001103	RNA polymerase II repressing transcription factor binding	Molecular Function	1	B4DYY3
6	GO:0004001	adenosine kinase activity	Molecular Function	1	A0A140VJE0
6	GO:0004536	deoxyribonuclease activity	Molecular Function	1	P17096
6	GO:0003690	double-stranded DNA binding	Molecular Function	7	Q5TEC6, Q96T88, C9JCN8, A0A087X1T2, A5YRV2, P17096, F1JVV5
6	GO:0001102	RNA polymerase II activating transcription factor binding	Molecular Function	1	Q09472
6	GO:0046943	carboxylic acid transmembrane transporter activity	Molecular Function	2	A0A0A0MTB0, Q9HBR0
6	GO:0004672	protein kinase activity	Molecular Function	3	Q9H5M4, P08581, B2R841
6	GO:0015926	glucosidase activity	Molecular Function	1	Q2M2H8
6	GO:0061631	ubiquitin conjugating enzyme activity	Molecular Function	1	B2R4U3
6	GO:0031994	insulin-like growth factor I binding	Molecular Function	1	A0A024R8K7
6	GO:0008017	microtubule binding	Molecular Function	2	Q9Y4B5, B2R841
6	GO:0016215	acyl-CoA desaturase activity	Molecular Function	1	O00767
6	GO:0003684	damaged DNA binding	Molecular Function	1	Q09472
6	GO:0004175	endopeptidase activity	Molecular Function	1	B6CGU5
6	GO:0042379	chemokine receptor binding	Molecular Function	1	A6NLH6
6	GO:0048406	nerve growth factor binding	Molecular Function	1	A8KAQ3
6	GO:0035596	methylthiotransferase activity	Molecular Function	1	Q5VV42
6	GO:0008234	cysteine-type peptidase activity	Molecular Function	1	B6CGU5
6	GO:0044822	poly(A) RNA binding	Molecular Function	30	O95478, Q13895, Q8NEF9, Q9BVP2, Q6DKI1, B3KNS8, P62081, Q9H9Y2, Q5T280, B2R823, Q9Y3C1, H0UI22, P62857, A0A140VJE0, F1JVV5, Q6FHK1, P82914, Q8N4P8, Q13823, A0A024RDF4, J3QR09, B3KS36, Q9NY93, B4DND9, Q6IAM0, Q9BVJ6, Q9Y4B5, P83881, A8K7D9, P62269
6	GO:0008139	nuclear localization sequence binding	Molecular Function	1	A8K7D9
6	GO:0004812	aminoacyl-tRNA ligase activity	Molecular Function	1	H0UI22
6	GO:0016410	N-acyltransferase activity	Molecular Function	1	Q09472
6	GO:0003725	double-stranded RNA binding	Molecular Function	1	Q86U90
6	GO:0005524	ATP binding	Molecular Function	7	Q9H5M4, P08581, Q6PJ25, B2R841, H0UI22, Q8IY37, Q9NY93
6	GO:0035257	nuclear hormone receptor binding	Molecular Function	2	Q09472, P17096
6	GO:0031492	nucleosomal DNA binding	Molecular Function	1	Q5TEC6
6	GO:0046965	retinoid X receptor binding	Molecular Function	1	P17096
6	GO:0016175	superoxide-generating NADPH oxidase activity	Molecular Function	1	B4DT46
7	GO:0004197	cysteine-type endopeptidase activity	Molecular Function	1	B6CGU5
7	GO:0022890	inorganic cation transmembrane transporter activity	Molecular Function	1	A0A097PY54
7	GO:0035598	N6-threonylcarbomyladenosine methylthiotransferase activity	Molecular Function	1	Q5VV42
7	GO:0004814	arginine-tRNA ligase activity	Molecular Function	1	H0UI22
7	GO:0015171	amino acid transmembrane transporter activity	Molecular Function	2	A0A0A0MTB0, Q9HBR0
7	GO:0004713	protein tyrosine kinase activity	Molecular Function	1	P08581
7	GO:0019206	nucleoside kinase activity	Molecular Function	1	A0A140VJE0
7	GO:0008270	zinc ion binding	Molecular Function	3	Q09472, Q96T88, P62273
7	GO:0035258	steroid hormone receptor binding	Molecular Function	1	Q09472
7	GO:1990837	sequence-specific double-stranded DNA binding	Molecular Function	7	Q5TEC6, C9JCN8, Q96T88, A0A087X1T2, A5YRV2, P17096, F1JVV5
7	GO:0047144	2-acylglycerol-3-phosphate O-acyltransferase activity	Molecular Function	1	Q92604
7	GO:0004721	phosphoprotein phosphatase activity	Molecular Function	1	B5BU78
7	GO:0017111	nucleoside-triphosphatase activity	Molecular Function	6	Q5JR08, Q8N4P8, Q6PJ25, A0A097PY54, Q8IY37, Q9NY93
7	GO:0008080	N-acetyltransferase activity	Molecular Function	1	Q09472
7	GO:0044729	hemi-methylated DNA-binding	Molecular Function	1	Q96T88
7	GO:0042171	lysophosphatidic acid acyltransferase activity	Molecular Function	1	Q92604
7	GO:0042162	telomeric DNA binding	Molecular Function	1	A0A024RDF4
7	GO:0090599	alpha-glucosidase activity	Molecular Function	1	Q2M2H8
7	GO:0008137	NADH dehydrogenase (ubiquinone) activity	Molecular Function	1	O75438
7	GO:0004520	endodeoxyribonuclease activity	Molecular Function	1	P17096
7	GO:0016411	acylglycerol O-acyltransferase activity	Molecular Function	1	Q92604
7	GO:0004768	stearoyl-CoA 9-desaturase activity	Molecular Function	1	O00767
7	GO:0005506	iron ion binding	Molecular Function	3	O00767, P08582, B3KRC6
7	GO:0004674	protein serine/threonine kinase activity	Molecular Function	2	Q9H5M4, B2R841
7	GO:0048020	CCR chemokine receptor binding	Molecular Function	1	A6NLH6
7	GO:0008106	alcohol dehydrogenase (NADP+) activity	Molecular Function	1	O75911
7	GO:0008514	organic anion transmembrane transporter activity	Molecular Function	1	D6RIZ4
7	GO:0005008	hepatocyte growth factor-activated receptor activity	Molecular Function	1	P08581
7	GO:0004661	protein geranylgeranyltransferase activity	Molecular Function	1	P53609
7	GO:0003743	translation initiation factor activity	Molecular Function	1	Q6IAM0
7	GO:0044212	transcription regulatory region DNA binding	Molecular Function	7	Q5TEC6, Q09472, C9JCN8, Q96T88, A0A087X1T2, A5YRV2, F1JVV5
8	GO:0000976	transcription regulatory region sequence-specific DNA binding	Molecular Function	6	Q5TEC6, C9JCN8, Q96T88, A0A087X1T2, A5YRV2, F1JVV5
8	GO:0031730	CCR5 chemokine receptor binding	Molecular Function	1	A6NLH6
8	GO:0003924	GTPase activity	Molecular Function	2	Q5JR08, Q8N4P8
8	GO:0001159	core promoter proximal region DNA binding	Molecular Function	3	Q96T88, A0A087X1T2, A5YRV2
8	GO:0004662	CAAX-protein geranylgeranyltransferase activity	Molecular Function	1	P53609
8	GO:0070888	E-box binding	Molecular Function	1	A0A087X1T2
8	GO:0015077	monovalent inorganic cation transmembrane transporter activity	Molecular Function	1	A0A097PY54
8	GO:0050681	androgen receptor binding	Molecular Function	1	Q09472
8	GO:0003680	AT DNA binding	Molecular Function	1	P17096
8	GO:0035326	enhancer binding	Molecular Function	1	Q5TEC6
8	GO:0008138	protein tyrosine/serine/threonine phosphatase activity	Molecular Function	1	B5BU78
8	GO:0001012	RNA polymerase II regulatory region DNA binding	Molecular Function	5	Q5TEC6, C9JCN8, A0A087X1T2, A5YRV2, F1JVV5
8	GO:0004725	protein tyrosine phosphatase activity	Molecular Function	1	B5BU78
8	GO:0015175	neutral amino acid transmembrane transporter activity	Molecular Function	1	A0A0A0MTB0
8	GO:0001047	core promoter binding	Molecular Function	2	Q5TEC6, Q09472
8	GO:0004468	lysine N-acetyltransferase activity, acting on acetyl phosphate as donor	Molecular Function	1	Q09472
8	GO:0003841	1-acylglycerol-3-phosphate O-acyltransferase activity	Molecular Function	1	Q92604
8	GO:0016887	ATPase activity	Molecular Function	4	Q6PJ25, A0A097PY54, Q8IY37, Q9NY93
8	GO:0015179	L-amino acid transmembrane transporter activity	Molecular Function	1	A0A0A0MTB0
8	GO:0034212	peptide N-acetyltransferase activity	Molecular Function	1	Q09472
8	GO:0004386	helicase activity	Molecular Function	2	Q8IY37, Q9NY93
8	GO:0052650	NADP-retinol dehydrogenase activity	Molecular Function	1	O75911
9	GO:0015078	hydrogen ion transmembrane transporter activity	Molecular Function	1	A0A097PY54
9	GO:0070035	purine NTP-dependent helicase activity	Molecular Function	2	Q8IY37, Q9NY93
9	GO:0001158	enhancer sequence-specific DNA binding	Molecular Function	1	Q5TEC6
9	GO:0000977	RNA polymerase II regulatory region sequence-specific DNA binding	Molecular Function	5	Q5TEC6, C9JCN8, A0A087X1T2, A5YRV2, F1JVV5
9	GO:0022889	serine transmembrane transporter activity	Molecular Function	1	A0A0A0MTB0
9	GO:0001046	core promoter sequence-specific DNA binding	Molecular Function	1	Q5TEC6
9	GO:0042623	ATPase activity, coupled	Molecular Function	3	Q6PJ25, Q8IY37, Q9NY93
9	GO:0000987	core promoter proximal region sequence-specific DNA binding	Molecular Function	3	Q96T88, A0A087X1T2, A5YRV2
9	GO:0061733	peptide-lysine-N-acetyltransferase activity	Molecular Function	1	Q09472
9	GO:0003724	RNA helicase activity	Molecular Function	2	Q8IY37, Q9NY93
10	GO:0008026	ATP-dependent helicase activity	Molecular Function	2	Q8IY37, Q9NY93
10	GO:0008186	RNA-dependent ATPase activity	Molecular Function	1	Q9NY93
10	GO:0004004	ATP-dependent RNA helicase activity	Molecular Function	1	Q9NY93
10	GO:0000980	RNA polymerase II distal enhancer sequence-specific DNA binding	Molecular Function	1	Q5TEC6
10	GO:0000979	RNA polymerase II core promoter sequence-specific DNA binding	Molecular Function	1	Q5TEC6
10	GO:0000978	RNA polymerase II core promoter proximal region sequence-specific DNA binding	Molecular Function	2	A0A087X1T2, A5YRV2
10	GO:0043492	ATPase activity, coupled to movement of substances	Molecular Function	1	Q6PJ25
10	GO:0004402	histone acetyltransferase activity	Molecular Function	1	Q09472

## Sheet: CC
GO function annotation and analysis different expressed proteins of OXA vs. control CC
Level	GO_ID	Term	Type	Seqs_Num	Sequences
1	GO:0005575	cellular_component	Cellular Component	103	Q6DKI1, Q8N5I2, A0A0A0MTB0, B3KNS8, P62081, Q5VV42, O43678, Q5JR08, Q96T88, Q6PJ25, H0UI22, B4DYY3, P82914, Q92604, A0A097PY54, Q9Y6H1, D6RIZ4, Q9UJC5, Q6QN92, B4DND9, F8VZJ2, P63173, A0A024R8K7, B3KRC6, H3BMQ2, A8K201, D6RBD9, Q9H5M4, Q13895, Q09472, Q8NEF9, Q9BVP2, P52735, E9PM82, A8KAQ3, Q9Y3C1, P17096, B1ALI9, Q9Y6A5, F1JVV5, Q6FHK1, O75911, A0A024R7S3, C9JCN8, Q14517, Q13823, B4DE48, Q8IY37,…
2	GO:0099080	supramolecular complex	Cellular Component	2	Q9H5M4, B2R841
2	GO:0030054	cell junction	Cellular Component	11	Q5JR08, Q14517, P63173, A0A024R8K7, P62273, P17096, J3QR09, P62081, A0A024R2W4, P62269, B3KS36
2	GO:0044464	cell part	Cellular Component	99	Q6DKI1, Q8N5I2, A0A0A0MTB0, B3KNS8, P62081, Q5VV42, O43678, Q5JR08, Q96T88, Q6PJ25, H0UI22, B4DYY3, P82914, Q92604, A0A097PY54, Q9Y6H1, D6RIZ4, Q9UJC5, Q6QN92, B4DND9, F8VZJ2, P63173, A0A024R8K7, B3KRC6, H3BMQ2, A8K201, Q9H5M4, Q13895, Q09472, Q8NEF9, Q9BVP2, P52735, E9PM82, A8KAQ3, Q9Y3C1, P17096, B1ALI9, Q9Y6A5, F1JVV5, Q6FHK1, O75911, A0A024R7S3, C9JCN8, Q14517, Q13823, B4DE48, Q8IY37, Q6IAM0,…
2	GO:0044422	organelle part	Cellular Component	70	O95478, Q6DKI1, Q96EX3, B3KNS8, P62081, Q5VV42, O43678, B5BU78, B2R823, Q5JR08, Q96T88, Q6PJ25, H0UI22, P62273, D3DR37, A0A140VJE0, B4DYY3, P82914, Q92604, A0A024RDF4, A0A097PY54, J3QR09, D6RIZ4, O43805, Q9UJC5, Q6QN92, Q9NY93, B4DND9, P63173, P83881, B3KRC6, H3BMQ2, A8K201, O00767, Q9H5M4, Q09472, Q5TEC6, Q13895, A0A087X1T2, Q9BVP2, A8KAQ3, Q9H9Y2, B2R841, Q9Y3C1, B2R4U3, P17096, B4DT46, P62857,…
2	GO:0032991	macromolecular complex	Cellular Component	50	O95478, Q6DKI1, Q96EX3, P62081, O43678, Q5JR08, Q96T88, P62273, P53609, B4DYY3, B6CGU5, P82914, A0A097PY54, A0A024RDF4, J3QR09, Q9Y6H1, Q6QN92, F8VZJ2, P63173, A0A024R8K7, P83881, H3BMQ2, Q9H5M4, Q5TEC6, Q09472, A0A087X1T2, Q9H9Y2, Q03169, B2R841, B2R4U3, P17096, B4DT46, A0A024R2W4, P62857, F1JVV5, Q6FHK1, A0A024R7S3, O75438, C9JCN8, O15230, B4DE48, Q5JXX1, B3KS36, Q6IAM0, Q9Y4B5, Q9BVJ6, P62861,…
2	GO:0043226	organelle	Cellular Component	91	O95478, Q6DKI1, Q8N5I2, Q96EX3, A0A0A0MTB0, B3KNS8, P62081, Q5VV42, O43678, B5BU78, Q5T280, B2R823, Q5JR08, Q96T88, Q6PJ25, H0UI22, P62273, D3DR37, A0A140VJE0, B4DYY3, P07311, B6CGU5, Q52LW3, P82914, Q12872, Q92604, A0A024RDF4, A0A097PY54, B4DE67, J3QR09, Q2M2H8, Q9Y6H1, D6RIZ4, O43805, Q9UJC5, Q6QN92, Q9NY93, B4DND9, F8VZJ2, P63173, A0A024R8K7, P83881, B3KRC6, H3BMQ2, A8K201, O00767, Q9H5M4, Q09…
2	GO:0044421	extracellular region part	Cellular Component	28	Q5TEC6, Q9BVP2, Q8N5I2, A0A0A0MTB0, P62081, B5BU78, Q75MX0, Q5JR08, Q03169, P08582, P62273, P62857, A0A024R2W4, P07311, O75438, Q14517, O15230, A0A024RDF4, A0A097PY54, B4DE67, Q9UJC5, B3KS36, F8VZJ2, P62861, Q9Y4B5, A0A024R8K7, A5YRV2, P62269
2	GO:0044425	membrane part	Cellular Component	27	O00767, Q09472, A0A087X1T2, A6NLH6, Q5VV42, O43678, A8KAQ3, B5BU78, Q5JR08, Q6PJ25, P08581, P08582, B4DT46, A0A024R2W4, A0A024R7S3, O75438, O75911, Q92604, Q14517, O15230, A0A097PY54, D6RIZ4, Q9Y4B5, A0A024R8K7, A5YRV2, B3KRC6, D6RBD9
2	GO:0005576	extracellular region	Cellular Component	28	Q5TEC6, Q9BVP2, Q8N5I2, A0A0A0MTB0, P62081, B5BU78, Q75MX0, Q5JR08, Q03169, P08582, P62273, P62857, A0A024R2W4, P07311, O75438, Q14517, O15230, A0A024RDF4, A0A097PY54, B4DE67, Q9UJC5, B3KS36, F8VZJ2, P62861, Q9Y4B5, A0A024R8K7, A5YRV2, P62269
2	GO:0005623	cell	Cellular Component	100	Q6DKI1, Q8N5I2, A0A0A0MTB0, B3KNS8, P62081, Q5VV42, O43678, Q5JR08, Q96T88, Q6PJ25, H0UI22, B4DYY3, P82914, Q92604, A0A097PY54, Q9Y6H1, D6RIZ4, Q9UJC5, Q6QN92, B4DND9, F8VZJ2, P63173, A0A024R8K7, B3KRC6, H3BMQ2, A8K201, D6RBD9, Q9H5M4, Q13895, Q09472, Q8NEF9, Q9BVP2, P52735, E9PM82, A8KAQ3, Q9Y3C1, P17096, B1ALI9, Q9Y6A5, F1JVV5, Q6FHK1, O75911, A0A024R7S3, C9JCN8, Q14517, Q13823, B4DE48, Q8IY37,…
2	GO:0016020	membrane	Cellular Component	48	O00767, Q9H5M4, Q09472, Q5TEC6, Q13895, A0A087X1T2, Q9BVP2, Q8N5I2, A0A0A0MTB0, A6NLH6, Q5VV42, P62081, O43678, A8KAQ3, B5BU78, Q5JR08, Q6PJ25, P08581, P08582, B4DT46, D3DR37, A0A024R2W4, Q9HBR0, Q6FHK1, B6CGU5, P82914, A0A024R7S3, O75438, O75911, Q92604, Q8N4P8, Q14517, Q13823, O15230, A0A097PY54, J3QR09, Q2M2H8, D6RIZ4, B4DE48, Q5JXX1, Q9NY93, Q9Y4B5, A0A024R8K7, A5YRV2, B3KRC6, A8K7D9, P62269,…
2	GO:0031974	membrane-enclosed lumen	Cellular Component	45	O95478, Q9H5M4, Q13895, Q5TEC6, Q09472, Q9BVP2, A0A087X1T2, B3KNS8, P62081, Q9H9Y2, B2R823, Q96T88, Q9Y3C1, B2R841, H0UI22, P62273, B2R4U3, P17096, P62857, A0A024R2W4, A0A140VJE0, F1JVV5, Q96GA3, Q6FHK1, P82914, C9JCN8, Q8N4P8, Q13823, A0A024RDF4, J3QR09, Q8IY37, Q6QN92, Q9UJC5, B3KS36, Q9NY93, Q5JXX1, B4DND9, A0A024R8I8, Q9BVJ6, P62861, A5YRV2, A8K7D9, H3BMQ2, A8K201, P62269
3	GO:0019898	extrinsic component of membrane	Cellular Component	2	Q09472, Q5JR08
3	GO:0045178	basal part of cell	Cellular Component	1	P08581
3	GO:0098796	membrane protein complex	Cellular Component	10	O75438, Q09472, A0A024R7S3, A0A024R8K7, A0A087X1T2, O15230, A0A097PY54, B4DT46, A0A024R2W4, O43678
3	GO:0099081	supramolecular polymer	Cellular Component	2	Q9H5M4, B2R841
3	GO:0070161	anchoring junction	Cellular Component	10	Q5JR08, P63173, Q14517, P62273, P17096, J3QR09, P62081, A0A024R2W4, P62269, B3KS36
3	GO:0044424	intracellular part	Cellular Component	99	Q6DKI1, Q8N5I2, A0A0A0MTB0, B3KNS8, P62081, Q5VV42, O43678, Q5JR08, Q96T88, Q6PJ25, H0UI22, B4DYY3, P82914, Q92604, A0A097PY54, Q9Y6H1, D6RIZ4, Q9UJC5, Q6QN92, B4DND9, F8VZJ2, P63173, A0A024R8K7, B3KRC6, H3BMQ2, A8K201, Q9H5M4, Q13895, Q09472, Q8NEF9, Q9BVP2, P52735, A8KAQ3, E9PM82, Q9Y3C1, P17096, B1ALI9, Q9Y6A5, F1JVV5, Q6FHK1, O75911, A0A024R7S3, C9JCN8, Q14517, Q13823, B4DE48, Q8IY37, Q6IAM0,…
3	GO:0005929	cilium	Cellular Component	3	O75911, Q96EX3, B4DYY3
3	GO:0043228	non-membrane-bounded organelle	Cellular Component	48	O95478, Q6DKI1, Q96EX3, B3KNS8, P62081, B5BU78, Q5T280, B2R823, Q5JR08, Q96T88, P62273, D3DR37, B4DYY3, P82914, J3QR09, O43805, Q9NY93, B4DND9, P63173, P83881, H3BMQ2, A8K201, Q9H5M4, Q5TEC6, Q13895, Q09472, Q9BVP2, Q9H9Y2, B2R841, Q9Y3C1, B2R4U3, P17096, A0A024R2W4, P62857, Q9Y6A5, F1JVV5, Q6FHK1, Q8N4P8, Q13823, Q8IY37, B3KS36, Q5JXX1, A0A024R8I8, Q6IAM0, Q9Y4B5, P62861, A5YRV2, P62269
3	GO:0097458	neuron part	Cellular Component	1	O75911
3	GO:0030496	midbody	Cellular Component	3	Q9Y4B5, B2R841, D3DR37
3	GO:0005905	clathrin-coated pit	Cellular Component	2	A0A024R7S3, A8KAQ3
3	GO:0043227	membrane-bounded organelle	Cellular Component	81	O95478, Q8N5I2, A0A0A0MTB0, B3KNS8, Q5VV42, P62081, O43678, B5BU78, B2R823, Q5JR08, Q96T88, Q6PJ25, H0UI22, P62273, A0A140VJE0, P07311, B6CGU5, P82914, Q12872, Q92604, A0A024RDF4, A0A097PY54, B4DE67, J3QR09, Q2M2H8, Q9Y6H1, D6RIZ4, O43805, Q9UJC5, Q6QN92, Q9NY93, B4DND9, F8VZJ2, A0A024R8K7, B3KRC6, A8K201, H3BMQ2, O00767, Q9H5M4, Q09472, Q5TEC6, Q13895, A0A087X1T2, Q9BVP2, A6NLH6, A8KAQ3, Q75MX0,…
3	GO:0032153	cell division site	Cellular Component	1	Q5JR08
3	GO:0044441	ciliary part	Cellular Component	3	O75911, Q96EX3, B4DYY3
3	GO:0005615	extracellular space	Cellular Component	8	P62861, Q9Y4B5, Q03169, Q9BVP2, P08582, A5YRV2, O15230, A0A024R2W4
3	GO:0031090	organelle membrane	Cellular Component	14	O75911, P82914, A0A024R7S3, O75438, Q8N4P8, A0A087X1T2, A0A097PY54, O43678, D6RIZ4, B4DE48, Q5JR08, Q6PJ25, B4DT46, Q6FHK1
3	GO:0030055	cell-substrate junction	Cellular Component	11	Q5JR08, P63173, Q14517, A0A024R8K7, P62273, P17096, J3QR09, P62081, A0A024R2W4, P62269, B3KS36
3	GO:0070938	contractile ring	Cellular Component	1	A0A024R2W4
3	GO:0032993	protein-DNA complex	Cellular Component	1	Q5TEC6
3	GO:1990204	oxidoreductase complex	Cellular Component	4	O75438, B4DT46, O43678, Q6QN92
3	GO:0043229	intracellular organelle	Cellular Component	86	O95478, Q6DKI1, Q96EX3, B3KNS8, P62081, Q5VV42, O43678, B5BU78, Q5T280, B2R823, Q5JR08, Q96T88, Q6PJ25, H0UI22, P62273, D3DR37, A0A140VJE0, B4DYY3, B6CGU5, Q52LW3, P82914, Q12872, Q92604, A0A024RDF4, A0A097PY54, B4DE67, J3QR09, Q2M2H8, Q9Y6H1, D6RIZ4, O43805, Q9UJC5, Q6QN92, Q9NY93, B4DND9, P63173, A0A024R8K7, P83881, B3KRC6, H3BMQ2, A8K201, O00767, Q9H5M4, Q09472, Q5TEC6, Q13895, A0A087X1T2, Q9B…
3	GO:0005911	cell-cell junction	Cellular Component	2	Q5JR08, Q14517
3	GO:0031975	envelope	Cellular Component	6	P82914, O75438, Q8N4P8, A0A097PY54, O43678, Q6FHK1
3	GO:0070062	extracellular exosome	Cellular Component	24	Q5TEC6, O75438, Q14517, Q8N5I2, O15230, A0A024RDF4, A0A097PY54, A0A0A0MTB0, B4DE67, P62081, Q9UJC5, B3KS36, B5BU78, F8VZJ2, Q75MX0, Q5JR08, A0A024R8K7, P08582, P62273, A5YRV2, P62857, A0A024R2W4, P62269, P07311
3	GO:0070469	respiratory chain	Cellular Component	2	O75438, O43678
3	GO:0044455	mitochondrial membrane part	Cellular Component	3	O75438, A0A097PY54, O43678
3	GO:0005886	plasma membrane	Cellular Component	20	O75911, Q09472, A0A024R7S3, Q14517, O15230, Q8N5I2, A0A0A0MTB0, A8KAQ3, Q5JXX1, B5BU78, Q5JR08, Q9Y4B5, P08581, Q6PJ25, A0A024R8K7, P08582, A5YRV2, B4DT46, A0A024R2W4, B3KRC6
3	GO:0043230	extracellular organelle	Cellular Component	24	Q5TEC6, Q8N5I2, A0A0A0MTB0, P62081, B5BU78, Q75MX0, Q5JR08, P08582, P62273, P62857, A0A024R2W4, P07311, O75438, Q14517, O15230, A0A024RDF4, A0A097PY54, B4DE67, Q9UJC5, B3KS36, F8VZJ2, A0A024R8K7, A5YRV2, P62269
3	GO:0000313	organellar ribosome	Cellular Component	2	P82914, Q6FHK1
3	GO:0098589	membrane region	Cellular Component	2	A0A024R7S3, A8KAQ3
3	GO:0071944	cell periphery	Cellular Component	21	O75911, Q09472, A0A024R7S3, Q14517, O15230, Q8N5I2, A0A0A0MTB0, A8KAQ3, Q5JXX1, B5BU78, Q5JR08, Q9Y4B5, P08581, Q03169, Q6PJ25, A0A024R8K7, P08582, A5YRV2, B4DT46, A0A024R2W4, B3KRC6
3	GO:0000785	chromatin	Cellular Component	6	Q5TEC6, Q09472, Q96T88, A5YRV2, P17096, F1JVV5
3	GO:0043233	organelle lumen	Cellular Component	45	O95478, Q9H5M4, Q13895, Q5TEC6, Q09472, Q9BVP2, A0A087X1T2, B3KNS8, P62081, Q9H9Y2, B2R823, Q96T88, Q9Y3C1, B2R841, H0UI22, P62273, B2R4U3, P17096, P62857, A0A024R2W4, A0A140VJE0, F1JVV5, Q96GA3, Q6FHK1, P82914, C9JCN8, Q8N4P8, Q13823, A0A024RDF4, J3QR09, Q8IY37, Q6QN92, Q9UJC5, B3KS36, Q9NY93, Q5JXX1, B4DND9, A0A024R8I8, Q9BVJ6, P62861, A5YRV2, A8K7D9, H3BMQ2, A8K201, P62269
3	GO:0005789	endoplasmic reticulum membrane	Cellular Component	8	O00767, Q5JR08, O75911, Q92604, A0A087X1T2, B4DT46, Q5VV42, B3KRC6
3	GO:0005622	intracellular	Cellular Component	99	Q6DKI1, Q8N5I2, A0A0A0MTB0, B3KNS8, P62081, Q5VV42, O43678, Q5JR08, Q96T88, Q6PJ25, H0UI22, B4DYY3, P82914, Q92604, A0A097PY54, Q9Y6H1, D6RIZ4, Q9UJC5, Q6QN92, B4DND9, F8VZJ2, P63173, A0A024R8K7, B3KRC6, H3BMQ2, A8K201, Q9H5M4, Q13895, Q09472, Q8NEF9, Q9BVP2, P52735, A8KAQ3, E9PM82, Q9Y3C1, P17096, B1ALI9, Q9Y6A5, F1JVV5, Q6FHK1, O75911, A0A024R7S3, C9JCN8, Q14517, Q13823, B4DE48, Q8IY37, Q6IAM0,…
3	GO:1903561	extracellular vesicle	Cellular Component	24	Q5TEC6, Q8N5I2, A0A0A0MTB0, P62081, B5BU78, Q75MX0, Q5JR08, P08582, P62273, P62857, A0A024R2W4, P07311, O75438, Q14517, O15230, A0A024RDF4, A0A097PY54, B4DE67, Q9UJC5, B3KS36, F8VZJ2, A0A024R8K7, A5YRV2, P62269
3	GO:0098590	plasma membrane region	Cellular Component	3	O75911, Q9Y4B5, P08581
3	GO:0043234	protein complex	Cellular Component	32	Q9H5M4, Q5TEC6, Q09472, A0A087X1T2, O43678, Q5JR08, Q96T88, Q03169, B2R841, B2R4U3, P53609, P17096, B4DT46, A0A024R2W4, B4DYY3, F1JVV5, B6CGU5, A0A024R7S3, O75438, C9JCN8, O15230, A0A097PY54, Q9Y6H1, B4DE48, Q6QN92, Q5JXX1, F8VZJ2, Q9Y4B5, Q6IAM0, A0A024R8K7, A5YRV2, A8K7D9
3	GO:1990904	ribonucleoprotein complex	Cellular Component	18	O95478, P82914, Q6DKI1, A0A024RDF4, J3QR09, P62081, B3KS36, Q9H9Y2, Q9BVJ6, Q6IAM0, P62861, P63173, P83881, P62273, P62857, H3BMQ2, P62269, Q6FHK1
3	GO:0098552	side of membrane	Cellular Component	2	Q5JR08, B5BU78
3	GO:0098805	whole membrane	Cellular Component	6	A0A024R7S3, Q5JR08, Q6PJ25, B4DT46, B4DE48, A8KAQ3
3	GO:0031224	intrinsic component of membrane	Cellular Component	15	O00767, Q14517, A0A087X1T2, O15230, A6NLH6, D6RIZ4, A8KAQ3, Q6PJ25, P08581, P08582, A0A024R8K7, A5YRV2, B4DT46, A0A024R2W4, D6RBD9
3	GO:0042995	cell projection	Cellular Component	7	Q9H5M4, O75911, Q5JR08, A0A024R8K7, Q96EX3, A0A024R2W4, B4DYY3
3	GO:0048475	coated membrane	Cellular Component	1	A0A024R7S3
[truncated: 222 more rows]

## Sheet: Enrichment
GO function annotation and analysis different expressed proteins of OXA vs. control Enrichment
[truncated: 2,296 more rows]
